# Supplementary material for: Quantitative redox proteomics revealed molecular mechanisms of salt tolerance in the roots of sugar beet monomeric addition line M14
Source: Bot Stud. 2022 Mar 5;63:5. doi: 10.1186/s40529-022-00337-w (PMC8898211; doi:10.1186/s40529-022-00337-w)
Supplement: Supplementary file 5 — Additional file 5: Table S4. List of redox proteins identified using iodoTMTRAQ in BvM14 roots under control and 400 mM NaCl treatment. [file 40529_2022_337_MOESM5_ESM.xlsx]

## Sheet: PeptideGroups
Checked	Confidence	PSM Ambiguity	Sequence	Annotated Sequence	Modifications	Modifications (all possible sites)	Modifications in Master Proteins	Modifications in Master Proteins (all Sites)	Qvality PEP	Qvality q-value	SVM_Score	# Protein Groups	# Proteins	# PSMs	Master Protein Accessions	Protein Accessions	Positions in Master Proteins	# Missed Cleavages	Theo. MH+ [Da]	Sequence Length	Abundance Ratio: (F1, 127) / (F1, 126)	Abundance Ratio: (F1, 128) / (F1, 126)	Abundance Ratio: (F1, 129) / (F1, 126)	Abundance Ratio: (F1, 130) / (F1, 126)	Abundance Ratio: (F1, 131) / (F1, 126)	Abundance Ratio (log2): (F1, 127) / (F1, 126)	Abundance Ratio (log2): (F1, 128) / (F1, 126)	Abundance Ratio (log2): (F1, 129) / (F1, 126)	Abundance Ratio (log2): (F1, 130) / (F1, 126)	Abundance Ratio (log2): (F1, 131) / (F1, 126)	Abundances (Scaled): F1: 126, Control	Abundances (Scaled): F1: 127, Sample	Abundances (Scaled): F1: 128, Sample	Abundances (Scaled): F1: 129, Sample	Abundances (Scaled): F1: 130, Sample	Abundances (Scaled): F1: 131, Sample	Abundances (Normalized): F1: 126, Control	Abundances (Normalized): F1: 127, Sample	Abundances (Normalized): F1: 128, Sample	Abundances (Normalized): F1: 129, Sample	Abundances (Normalized): F1: 130, Sample	Abundances (Normalized): F1: 131, Sample	Abundance: F1: 126, Control	Abundance: F1: 127, Sample	Abundance: F1: 128, Sample	Abundance: F1: 129, Sample	Abundance: F1: 130, Sample	Abundance: F1: 131, Sample	Abundances Count: F1: 126, Control
FALSE	High	Unambiguous	TDNYCCNSGSCGPTDYSR	[K].TDNYCCNSGSCGPTDYSR.[Y]	3xiodoTMT6plex [C5; C6; C11]	3xiodoTMT6plex [C5; C6; C11]			0.0356248	0	0.341	1	1	1	731331163	731331163	731331163 [175-192]	0	2930.38	18	1.74	0.748	0.497	1.178	1.57	0.8	-0.42	-1.01	0.24	0.65	89.1	155.1	66.7	44.3	104.9	139.9	1105.9	1924.7	827.3	549.4	1302.3	1736	795.4	1081.4	555.5	288	1302.3	1058.9	1
FALSE	High	Unambiguous	ALMLQGVDILADAVAVTMGPK	[R].ALMLQGVDILADAVAVTMGPK.[G]	2xOxidation [M3; M18]	2xOxidation [M3; M18]			0.0130734	0	0.504	1	1	2	A0A1D1YFX2	A0A1D1YFX2	A0A1D1YFX2 [34-54]	0	2145.13	21
FALSE	High	Unambiguous	VKTAVEFWCPGVVSCADIVVLAAR	[R].VKTAVEFWCPGVVSCADIVVLAAR.[D]	2xiodoTMT6plex [C9; C15]	2xiodoTMT6plex [C9; C15]			0.103872	0.00224036	0.167	1	1	1	D8SVA9	D8SVA9	D8SVA9 [84-107]	1	3191.78	24	1.686	0.698	1.513	1.959	1.505	0.75	-0.52	0.6	0.97	0.59	71.8	121	50.1	108.6	140.6	108	499.1	841.7	348.3	755	977.7	751.2	359	472.9	233.9	395.8	977.7	458.2	1
FALSE	High	Unambiguous	IEVHEDACTCVGSVR	[K].IEVHEDACTCVGSVR.[R]	2xiodoTMT6plex [C8; C10]	2xiodoTMT6plex [C8; C10]			0.090171	0.000962316	0.19	1	1	1	731344151	731344151	731344151 [42-56]	0	2276.19	15	0.721	0.87	0.734	1.405	0.775	-0.47	-0.2	-0.45	0.49	-0.37	109	78.6	94.8	80	153.1	84.4	346.5	249.9	301.3	254.5	486.8	268.4	249.2	140.4	202.3	133.4	486.8	163.7	1
FALSE	High	Unambiguous	QAVEAQCPGVVSCSDILAIAAR	[K].QAVEAQCPGVVSCSDILAIAAR.[D]	2xiodoTMT6plex [C7; C13]	2xiodoTMT6plex [C7; C13]			0.168851	0.00563879	0.088	1	1	1	A0A2G9HTZ9	A0A2G9HTZ9	A0A2G9HTZ9 [108-129]	0	2859.56	22	1.333	1.316	1.594	0.715	1.397	0.41	0.4	0.67	-0.48	0.48	81.6	108.8	107.3	130	58.3	114	67	89.3	88.2	106.8	47.9	93.6	48.2	50.2	59.2	56	47.9	57.1	1
FALSE	High	Unambiguous	AAVENACPGVVSCADILTLAAR	[K].AAVENACPGVVSCADILTLAAR.[D]	2xiodoTMT6plex [C7; C13]	2xiodoTMT6plex [C7; C13]			0.0104127	0	0.541	1	5	3	A0A1J3EH71	Q42517; Q39034; A0A1J3EH71; A0A1J3JZX7; A0A178UQK5	A0A1J3EH71 [110-131]	0	2802.54	22	3.004	1.262	1.81	0.545	1.29	1.59	0.34	0.86	-0.88	0.37	67.3	202.3	85	121.9	36.7	86.9	835.3	2509.3	1054.4	1511.9	455.4	1077.6	600.8	1409.9	708	792.6	455.4	657.3	3
FALSE	High	Unambiguous	SDLENACPSTVSCADILTLAAR	[K].SDLENACPSTVSCADILTLAAR.[ED]	2xiodoTMT6plex [C7; C13]	2xiodoTMT6plex [C7; C13]			0.0512082	0	0.282	1	2	4	A0A1S2YYJ3	A0A1S2YYJ3; G7K821	A0A1S2YYJ3 [110-131]	0	2908.53	22	1.628	1.048	1.131	0.571	1.031	0.7	0.07	0.18	-0.81	0.04	93.6	152.4	98.1	105.9	53.5	96.5	2148.3	3496.7	2250.8	2429.6	1227.1	2214.6	1545.1	1964.7	1511.4	1273.7	1227.1	1350.8	4
FALSE	High	Unambiguous	SQVESVCPGVVSCADILAVAAR	[K].SQVESVCPGVVSCADILAVAAR.[DE]	2xiodoTMT6plex [C7; C13]	2xiodoTMT6plex [C7; C13]			0.0837559	0.000962316	0.202	1	4	1	731349376	1108958980; Q8VWP7; 731349378; 731349376	731349376 [156-177]	0	2832.55	22	0.658	0.546	0.687	1.162	1.39	-0.6	-0.87	-0.54	0.22	0.48	110.2	72.5	60.2	75.7	128.1	153.2	446	293.3	243.6	306.5	518.5	620.1	320.8	164.8	163.6	160.7	518.5	378.2	1
FALSE	High	Unambiguous	SAVEEACPGVVSCADTLALVAR	[K].SAVEEACPGVVSCADTLALVAR.[D]	2xiodoTMT6plex [C7; C13]	2xiodoTMT6plex [C7; C13]			0.127245	0.00257247	0.134	1	1	1	A0A061E9W0	A0A061E9W0	A0A061E9W0 [112-133]	0	2819.52	22	1.51	1.334	0.753	0.539	1.403	0.59	0.42	-0.41	-0.89	0.49	91.8	138.5	122.4	69.1	49.5	128.8	1115.6	1684.4	1488	840.3	601.7	1565.5	802.4	946.4	999.2	440.5	601.7	954.9	1
FALSE	High	Unambiguous	SQVENICPGVVSCADILAVAAR	[K].SQVENICPGVVSCADILAVAAR.[D]	2xiodoTMT6plex [C7; C13]	2xiodoTMT6plex [C7; C13]			0.0722624	0.000962316	0.226	1	4	1	A5AI69	A5AI68; A5AI69; D7TAH9; F6HG23	A5AI69 [119-140]	0	2873.57	22	0.495	0.569	0.887	0.747	0.847	-1.01	-0.81	-0.17	-0.42	-0.24	132	65.3	75.1	117.1	98.6	111.8	623.9	308.8	355	553.2	466.1	528.6	448.7	173.5	238.4	290	466.1	322.4	1
FALSE	High	Unambiguous	AAVEQACPHTVSCADILALTAR	[K].AAVEQACPHTVSCADILALTAR.[D]	2xiodoTMT6plex [C7; C13]	2xiodoTMT6plex [C7; C13]			0.181784	0.00627731	0.076	1	2	2	731337443	731337441; 731337443	731337443 [114-135]	0	2898.57	22	1.056	1.208	1.472	0.545	1.225	0.08	0.27	0.56	-0.88	0.29	92.2	97.4	111.4	135.7	50.3	113	118.3	124.9	143	174.2	64.5	144.9	85.1	70.2	96	91.3	64.5	88.4	2
FALSE	High	Selected	AALEAACPSTVSCADILALTAR	[K].AALEAACPSTVSCADILALTAR.[D]	2xiodoTMT6plex [C7; C13]	2xiodoTMT6plex [C7; C13]			0.206845	0.00685958	0.055	1	1	1	A0A0A9MG34	A0A0A9MG34	A0A0A9MG34 [114-135]	0	2805.54	22	0.602	0.572	0.947	0.362	0.849	-0.73	-0.81	-0.08	-1.46	-0.24	138.5	83.4	79.2	131.2	50.2	117.6	37.3	22.4	21.3	35.3	13.5	31.6	26.8	12.6	14.3	18.5	13.5	19.3	1
FALSE	High	Unambiguous	ASVEAVCPGVVSCADILAITAR	[K].ASVEAVCPGVVSCADILAITAR.[D]	2xiodoTMT6plex [C7; C13]	2xiodoTMT6plex [C7; C13]			0.00617349	0	0.626	1	4	1	A0A287X935	A0A287X935; F2DVY5; M0VBL3; A0A287X9B0	A0A287X935 [105-126]	0	2803.56	22	3.112	1.245	1.891	0.54	1.395	1.64	0.32	0.92	-0.89	0.48	65.3	203.3	81.3	123.5	35.3	91.2	393.9	1225.9	490.4	744.7	212.7	549.6	283.3	688.8	329.3	390.4	212.7	335.2	1
FALSE	High	Unambiguous	VIDYACGAGADCR	[KR].VIDYACGAGADCR.[A]	2xiodoTMT6plex [C6; C12]	2xiodoTMT6plex [C6; C12]			0.11391	0.00257247	0.152	1	2	1	731339169	A0A0K9RV30; 731339169	731339169 [37-49]	0	1972.01	13	1.059	0.839	1.192	1.01	1.165	0.08	-0.25	0.25	0.01	0.22	95.8	101.4	80.4	114.1	96.7	111.6	488.3	517	409.8	582	493.3	568.9	351.2	290.5	275.2	305.1	493.3	347	1
FALSE	High	Unambiguous	VTDFCASCAGDLNLSQQAFNQIADTR	[R].VTDFCASCAGDLNLSQQAFNQIADTR.[A]	2xiodoTMT6plex [C5; C8]	2xiodoTMT6plex [C5; C8]			0.000895057	0	0.94	1	1	2	731353627	731353627	731353627 [90-115]	0	3446.72	26	0.505	0.52	0.666	1.487	1.777	-0.98	-0.94	-0.59	0.57	0.83	100.8	50.9	52.4	67.1	149.8	179	665.3	336.2	346.1	443.1	989	1182.2	478.5	188.9	232.4	232.3	989	721.1	2
FALSE	High	Unambiguous	VTDLCDSCAGDLNLSQEAFNVIADTR	[R].VTDLCDSCAGDLNLSQEAFNVIADTR.[A]	2xiodoTMT6plex [C5; C8]	2xiodoTMT6plex [C5; C8]			0.00013057	0	1.253	1	1	7	731339890	731339890	731339890 [91-116]	0	3428.72	26	0.399	0.348	0.527	1.119	1.32	-1.33	-1.52	-0.92	0.16	0.4	127.3	50.8	44.3	67.1	142.4	168.1	1416.5	565.3	492.5	746.4	1584.6	1870.2	1018.8	317.6	330.7	391.3	1584.6	1140.7	7
FALSE	High	Unambiguous	VVDLCPGCSANGLDLSQEAFSMIADPNAGR	[R].VVDLCPGCSANGLDLSQEAFSMIADPNAGR.[I]	2xiodoTMT6plex [C5; C8]	2xiodoTMT6plex [C5; C8]			0.00101845	0	0.919	1	1	1	731352762	731352762	731352762 [116-145]	0	3708.85	30	0.596	0.51	0.639	0.578	2.044	-0.75	-0.97	-0.65	-0.79	1.03	111.8	66.6	57	71.4	64.7	228.5	135	80.4	68.8	86.2	78.1	275.9	97.1	45.2	46.2	45.2	78.1	168.3	1
FALSE	High	Unambiguous	MDNLCCFSSVSQIVGGR	[-].MDNLCCFSSVSQIVGGR.[S]	2xiodoTMT6plex [C5; C6]; 1xAcetyl [N-Term]	2xiodoTMT6plex [C5; C6]; 1xAcetyl [N-Term]	731357976 1xAcetyl [N-Term]	731357976 1xAcetyl [N-Term]	0.116747	0.00257247	0.148	1	1	1	731357976	731357976	731357976 [1-17]	0	2516.28	17	1.185	1.175	1.231	2.167	1.362	0.25	0.23	0.3	1.12	0.45	73.9	87.6	86.9	91	160.1	100.7	495.3	587	582.1	609.6	1073	674.6	356.2	329.8	390.9	319.6	1073	411.5	1
FALSE	High	Unambiguous	LENLCPGTVSCADILAYAAR	[R].LENLCPGTVSCADILAYAAR.[D]	2xiodoTMT6plex [C5; C11]	2xiodoTMT6plex [C5; C11]			0.049353	0	0.288	1	2	1	A0A0J8CS88	A0A0J8CS88; 731321372	A0A0J8CS88 [119-138]	0	2738.47	20	0.676	0.627	0.845	0.675	1.351	-0.56	-0.67	-0.24	-0.57	0.43	116	78.4	72.7	98	78.3	156.7	779.2	526.8	488.5	658.5	525.8	1052.9	560.4	296	328	345.2	525.8	642.2	1
FALSE	High	Unambiguous	LEAACPKTVSCADILALAAR	[R].LEAACPKTVSCADILALAAR.[D]	2xiodoTMT6plex [C5; C11]	2xiodoTMT6plex [C5; C11]			0.0209918	0	0.427	1	1	1	J3L3F3	J3L3F3	J3L3F3 [148-167]	1	2674.51	20	1.954	1.227	1.713	1.682	1.662	0.97	0.3	0.78	0.75	0.73	65	126.9	79.7	111.3	109.2	107.9	82.2	160.5	100.8	140.8	138.2	136.6	59.1	90.2	67.7	73.8	138.2	83.3	1
FALSE	High	Selected	VEICQLPVGDGVTLCR	[R].VEICQLPVGDGVTLCR.[R]	2xiodoTMT6plex [C4; C15]	2xiodoTMT6plex [C4; C15]			0.00973153	0	0.552	1	45	1	731358219	C0PG46; Q7X6T5; Q5GLK6; A0A172Q4R0; Q6VWG8; A0A0S1MN70; A0A1V0E7H9; Q7X875; Q7X6T0; B6TML0; 731358219; C5Z4W3; Q8H2A1; A0A0K0K9S9; A0A1D6LLH8; Q7X5Y7; Q7XYW6; A0A1E5V7I5; Q7X874; Q9XGD5; V5YVG6; A0A088MTG2; C0P9Q1; B4FBY6; A0A172QB57; Q6VWH0; B8A3P7; Q7XYW7; K7VEA6; K9ND28; Q7XYW8; G1DE51; A0A1V0E7I9; A0A1V0E7K0; A0A1V0E7I8; A0A1L4AJB3; A0A1D6LLI0; A0A199URV1; A0A172QB77; A0A199VXN8; Q6VWJ0; A0A1…	731358219 [240-255]	0	2360.32	16	0.333	0.344	0.42	0.56	0.515	-1.58	-1.54	-1.25	-0.84	-0.96	189.1	63	65.1	79.5	105.9	97.4	830.8	276.9	285.8	349.1	465.3	427.9	597.5	155.6	191.9	183	465.3	261	1
FALSE	High	Rejected	VEICQLPVGDGISLCR	[R].VEICQLPVGDGISLCR.[R]	2xiodoTMT6plex [C4; C15]	2xiodoTMT6plex [C4; C15]			0.0464092	0	0.298	0	1	1		A0A251TMC3		0	2360.32	16
FALSE	High	Unambiguous	TVSCSANINAQCPQR	[R].TVSCSANINAQCPQR.[W]	2xiodoTMT6plex [C4; C12]	2xiodoTMT6plex [C4; C12]			0.00210433	0	0.801	1	1	2	731331149	731331149	731331149 [147-161]	0	2250.18	15	2.378	1.039	1.635	1.51	3.754	1.25	0.05	0.71	0.59	1.91	53	126.1	55.1	86.7	80.1	199.1	940	2235.2	976.5	1536.5	1419.5	3529.3	676.1	1255.9	655.7	805.5	1419.5	2152.7	2
FALSE	High	Unambiguous	GPCLNAPVCAMR	[R].GPCLNAPVCAMR.[V]	2xiodoTMT6plex [C3; C9]	2xiodoTMT6plex [C3; C9]			0.0172417	0	0.459	1	1	2	731338906	731338906	731338906 [92-103]	0	1890.03	12	1.19	0.963	1.064	0.827	1.64	0.25	-0.05	0.09	-0.27	0.71	89.8	106.8	86.5	95.5	74.2	147.2	846.1	1007	815.1	899.8	699.3	1387.7	608.5	565.8	547.3	471.7	699.3	846.4	2
FALSE	High	Unambiguous	NMCGVATCASYPVVA	[K].NMCGVATCASYPVVA.[-]	2xiodoTMT6plex [C3; C8]	2xiodoTMT6plex [C3; C8]			0.203064	0.00685958	0.058	1	50	2	A0A2P5RCS1	A0A2J6JSH7; B9RRA4; A0A1U8PG75; A0A0J8B8R9; A0A2P5YQB0; A0A0D2SIH7; A0A1J3HR59; V5N8E0; A0A0B0NTM4; A0A087GCH0; A0A0D2TCZ4; A0A2R6Q574; A0A2G2WCI0; A0A0D2RTJ0; A0A151SSL6; A0A1R3JAI3; A8J6X3; A0A2N9HDZ3; A0A2P5VRG2; A0A068CNX1; A0A022QM18; A0A1S3UWZ9; A0A0S3R8T0; A0A151RWE0; J3MXV5; A0A1D6ER43; A0A1R3H9Z0; A0A059CLY8; A0A067KCP8; A0A2P6RKQ5; A0A1U8JHL5; A0A0D2RTJ6; B1NC19; A0A1J3CZ40; A0A059CMD2;…	A0A2P5RCS1 [354-368]	0	2144.11	15	1.115	0.842	1.248	1.028	1.308	0.16	-0.25	0.32	0.04	0.39	91.7	102.3	77.3	114.5	94.3	120	1416	1578.8	1192.6	1767.3	1455.4	1852.4	1018.4	887.1	800.8	926.5	1455.4	1129.9	2
FALSE	High	Unambiguous	VTCVSGTNQGVPQPCR	[R].VTCVSGTNQGVPQPCR.[G]	2xiodoTMT6plex [C3; C15]	2xiodoTMT6plex [C3; C15]			4.56151e-05	0	1.424	1	1	8	731352762	731352762	731352762 [93-108]	0	2304.23	16	1.501	1.441	0.889	1.609	2.051	0.59	0.53	-0.17	0.69	1.04	70.7	106.1	101.8	62.8	113.7	144.9	4319.7	6483.9	6226	3841.6	6951.6	8860.6	3106.8	3643.1	4180.7	2013.9	6951.6	5404.5	8
FALSE	High	Unambiguous	LECDATLYGGTCR	[K].LECDATLYGGTCR.[Q]	2xiodoTMT6plex [C3; C12]	2xiodoTMT6plex [C3; C12]			0.109784	0.00224036	0.158	1	1	1	731350087	731350087	731350087 [95-107]	0	2060.07	13	1.271	1.085	1.073	1.043	1.131	0.35	0.12	0.1	0.06	0.18	90.8	115.5	98.6	97.5	94.8	102.8	749	952.2	813	803.8	781.4	847.3	538.7	535	545.9	421.4	781.4	516.8	1
FALSE	High	Selected	ECPGVVSCADILALASR	[KR].ECPGVVSCADILALASR.[D]	2xiodoTMT6plex [C2; C8]	2xiodoTMT6plex [C2; C8]			0.0941377	0.00187066	0.183	1	2	1	731356248	A0A0K9QWB4; 731356248	731356248 [119-135]	0	2362.3	17	0.604	0.627	0.561	1.131	0.892	-0.73	-0.67	-0.83	0.18	-0.17	124.6	75.3	78.2	69.9	141	111.1	347	209.7	217.7	194.6	392.6	309.5	249.6	117.8	146.2	102	392.6	188.8	1
FALSE	High	Rejected	ECPGVVSCADILALSAR	[K].ECPGVVSCADILALSAR.[D]	2xiodoTMT6plex [C2; C8]	2xiodoTMT6plex [C2; C8]			0.0964823	0.00187066	0.179	0	2	1		A0A200QL54; A0A1E5V589		0	2362.3	17
FALSE	High	Rejected	VCPGVVSCADILTLAAR	[RK].VCPGVVSCADILTLAAR.[D]	2xiodoTMT6plex [C2; C8]	2xiodoTMT6plex [C2; C8]			0.0270122	0	0.386	0	5	1		Q5QEB4; A0A0A0KHH0; A0A2G9GLB5; A0A2G9HQU5; O49192		0	2346.34	17
FALSE	High	Selected	VCPGVVSCADILAITAR	[K].VCPGVVSCADILAITAR.[D]	2xiodoTMT6plex [C2; C8]	2xiodoTMT6plex [C2; C8]			0.00760927	0	0.592	1	6	1	731316487	A0A218WCG3; A0A2H3Z9S8; A0A151TR07; 731316487; A0A0K9R0G7; A0A2I0I9E1	731316487 [115-131]	0	2346.34	17	1.099	0.811	1.176	2.195	1.08	0.14	-0.3	0.23	1.13	0.11	81.5	89.6	66.1	95.8	178.9	88	264.9	291.2	214.9	311.5	581.4	286.1	190.5	163.6	144.3	163.3	581.4	174.5	1
FALSE	High	Rejected	VCPGVVSCADIIIAATR	[R].VCPGVVSCADIIIAATR.[D]	2xiodoTMT6plex [C2; C8]	2xiodoTMT6plex [C2; C8]			0.018908	0	0.444	0	2	1		K7VGN6; A0A1B6QLT8		0	2346.34	17
FALSE	High	Unambiguous	GCVGCGSALFGSER	[K].GCVGCGSALFGSER.[S]	2xiodoTMT6plex [C2; C5]	2xiodoTMT6plex [C2; C5]			0.000452246	0	1.051	1	1	1	731319852	731319852	731319852 [129-142]	0	2001.04	14	0.774	0.629	0.904	1.277	1.11	-0.37	-0.67	-0.14	0.35	0.15	105.4	81.5	66.3	95.3	134.6	117	859.4	665.1	540.6	777.3	1097.5	954.2	618.1	373.7	363	407.5	1097.5	582	1
FALSE	High	Unambiguous	HTGAGLLSMANSGPGTNGCQFFITCAK	[K].HTGAGLLSMANSGPGTNGCQFFITCAK.[C]	2xiodoTMT6plex [C19; C25]	2xiodoTMT6plex [C19; C25]			0.100727	0.00224036	0.172	1	1	1	A0A2P4HWG1	A0A2P4HWG1	A0A2P4HWG1 [114-140]	0	3341.7	27	1.145	0.927	0.946	1.003	0.743	0.2	-0.11	-0.08	0	-0.43	104.1	119.2	96.5	98.5	104.4	77.3	720.6	825.1	668.1	681.6	722.8	535.3	518.3	463.6	448.6	357.3	722.8	326.5	1
FALSE	High	Unambiguous	LIGPDGQVSEFDAPDDCYILDSAENEGVEIPYSCR	[K].LIGPDGQVSEFDAPDDCYILDSAENEGVEIPYSCR.[A]	2xiodoTMT6plex [C17; C34]	2xiodoTMT6plex [C17; C34]			0.000324447	0	1.105	1	2	2	731349464	731349464; 731353570	731349464 [61-95]	0	4475.14	35	0.413	0.611	0.796	0.741	0.65	-1.28	-0.71	-0.33	-0.43	-0.62	142.5	58.9	87	113.4	105.6	92.6	251.1	103.8	153.4	199.9	186.1	163.3	180.6	58.3	103	104.8	186.1	99.6	1
FALSE	High	Unambiguous	AQNYVATAVQPCCQGISDAINNER	[K].AQNYVATAVQPCCQGISDAINNER.[S]	2xiodoTMT6plex [C12; C13]	2xiodoTMT6plex [C12; C13]			0.000502089	0	1.034	1	2	6	731341540	731341542; 731341540	731341540 [41-64]	0	3223.64	24	0.274	0.465	0.632	1.05	0.676	-1.87	-1.1	-0.66	0.07	-0.56	146.4	40.1	68.2	92.6	153.7	99	4809.6	1317.2	2238.5	3040	5048.1	3252.7	3459.2	740.1	1503.1	1593.7	5048.1	1984	6
FALSE	High	Unambiguous	CFTDCVDSFR	[RK].CFTDCVDSFR.[R]	2xiodoTMT6plex [C1; C5]	2xiodoTMT6plex [C1; C5]			0.217277	0.00825917	0.047	1	8	2	731334059	Q9XGX8; A0A200Q685; A0A022S3B2; S8EDL1; 731334059; A0A087SDK6; A0A1D2AGB9; A0A0K9QGR1	731334059 [43-52]	0	1850.93	10	1.082	0.995	1.128	1.608	1.442	0.11	-0.01	0.17	0.68	0.53	82.7	89.5	82.3	93.3	133	119.3	1806.3	1954.2	1796.8	2038	2903.7	2605.1	1299.1	1098	1206.5	1068.4	2903.7	1589	2
FALSE	High	Unambiguous	MQNDEGEIMDLYIPR	[-].MQNDEGEIMDLYIPR.[K]	1xOxidation [M9]; 1xAcetyl [N-Term]	1xOxidation [M9]; 1xAcetyl [N-Term]	731327015 1xAcetyl [N-Term]	731327015 1xAcetyl [N-Term]	0.00881954	0	0.568	1	1	3	731327015	731327015	731327015 [1-15]	0	1881.84	15
FALSE	High	Unambiguous	LVSAGIVQMR	[K].LVSAGIVQMR.[-]	1xOxidation [M9]	1xOxidation [M9]			0.041291	0	0.317	1	35	2	731330539	A0A1D6HEP1; B4FQT3; A0A1U8L5G3; J3LF94; B6U6S4; A0A1S3THD3; A0A0B0NC41; A0A0D9VIV0; A0A2P5WXA1; A0A0A9NIY1; A0A2H3YCU4; A0A0A9NXD3; A0A059CHJ9; A0A1E5WBA4; A0A0A9K660; A0A0S3T5G9; A0A0A9R8D7; 731330539; C5XS48; C4J4W3; A0A0P0VM71; A0A0A9P5P0; A0A151TJH1; A0A0E0K2Y7; A0A2I0B8R3; A0A0D3F859; M0TPL8; M0RP52; A0A1D1YTQ5; I1P2K0; B4FA63; K3YR55; A0A1U8JCI9; A0A0D2P1P4; A0A1D6HEP0	731330539 [571-580]	0	1089.61	10
FALSE	High	Unambiguous	IGTGSYISMAPHPDGSNR	[K].IGTGSYISMAPHPDGSNR.[A]	1xOxidation [M9]	1xOxidation [M9]			0.0362882	0	0.338	1	2	2	A0A0K9QSQ2	731344233; A0A0K9QSQ2	A0A0K9QSQ2 [220-237]	0	1875.87	18
FALSE	High	Unambiguous	NATNEAVQMSIGR	[R].NATNEAVQMSIGR.[K]	1xOxidation [M9]	1xOxidation [M9]			0.0153402	0	0.478	1	1	1	731320692	731320692	731320692 [156-168]	0	1406.67	13
FALSE	High	Unambiguous	NVGLEYCMSGLTGNTIDSHR	[K].NVGLEYCMSGLTGNTIDSHR.[L]	1xOxidation [M8]; 1xiodoTMT6plex [C7]	1xOxidation [M8]; 1xiodoTMT6plex [C7]			0.0129932	0	0.505	1	1	1	A0A1S3TTL2	A0A1S3TTL2	A0A1S3TTL2 [89-108]	0	2512.21	20	0.994	0.957	1.422	0.526	1.198	-0.01	-0.06	0.51	-0.93	0.26	98.4	97.8	94.2	140	51.8	117.9	79.7	79.2	76.2	113.3	41.9	95.4	57.3	44.5	51.2	59.4	41.9	58.2	1
FALSE	High	Rejected	SVCTEAGMFALR	[RK].SVCTEAGMFALR.[AES]	1xOxidation [M8]; 1xiodoTMT6plex [C3]	1xOxidation [M8]; 1xiodoTMT6plex [C3]			0.0935606	0.00187066	0.184	1	43	4	A0A0K9QG12	A0A1U8AME2; A0A0K9QG12; A0A1U8AQV7; V4SSD5; A0A2G9HUP9; W1NVS3; A0A2H5PSX9; D7TC80; V4SHG7; A0A2N9G596; A0A199UHD9; A0A061GE31; A0A2P4KWV3; M0TR36; M0UCL4; A0A176VCD4; A0A2P2M6P8; A0A2P4JV89; A0A1R3HJK1; A0A1D1Z087; A0A067ERB5; A0A067L7Y9; A0A061GCV2; A0A2C9W2S8; A0A2G9H892; A0A2P2M6U6; A0A2P4KZF4; D7KFD4; A0A2N9HV18; I0Z3C1; B9MUK8; A0A061S9M8; A0A2R6XR78; S8CZZ2; A0A2I0A7D2; A0A2P6QLC1; B9T505;…	A0A0K9QG12 [359-370]	0	1629.83	12
FALSE	High	Unambiguous	CALVYGQMNEPPGAR	[K].CALVYGQMNEPPGAR.[A]	1xOxidation [M8]; 1xiodoTMT6plex [C1]	1xOxidation [M8]; 1xiodoTMT6plex [C1]			0.00403864	0	0.695	4	251	5	A0A2P4LXF3; M0UCJ4; 731341013; A0A175YRR8	A0A287GJ54; A0A0A0KTA5; F2D5B2; O82722; D7M1G9; W5DDM7; A0A0D2VYM2; A0A1J7HJE4; A0A061E5Q6; A0A0A0KPJ2; A0A2H3XR79; A9NUR7; A0A1U8FHC9; A0A0K9NYL5; A0A1D5VBW3; A0A2P4LXF3; A0A0D2S1Z3; A0A059BEJ4; A0A2I0KLL8; A0A287LBT9; D8QQX5; A0A2I0XEZ3; A0A1U8EIM6; A0A1E5WI54; A0A0D2V4L6; A0A0D2VYM6; A0A0V0IJL8; A0A1J6K2R3; B8A7M8; A0A0E0L5G3; A0A1U8FNM3; P19023; A0A2G5F6M9; A0A0D3EGT2; A0A0S3SM21; A0A1U8F1W2;…	A0A2P4LXF3 [515-529]; M0UCJ4 [319-333]; 731341013 [289-303]; A0A175YRR8 [155-169]	0	1950.97	15	1.253	1.269	1.281	0.742	1.378	0.33	0.34	0.36	-0.43	0.46	86.7	108.6	110	111	64.3	119.4	1723.8	2159.8	2187.2	2208.3	1279.1	2375.4	1239.8	1213.5	1468.7	1157.7	1279.1	1448.9	5
FALSE	High	Rejected	SITLSHLMAPR	[K].SITLSHLMAPR.[L]	1xOxidation [M8]	1xOxidation [M8]			0.0982789	0.00187066	0.176	0	2	1		A0A1D5ZTF6; R7W5A3		0	1241.67	11
FALSE	High	Selected	TVTLSHIMAPR	[K].TVTLSHIMAPR.[L]	1xOxidation [M8]	1xOxidation [M8]			0.0982789	0.00187066	0.176	1	1	1	731342073	731342073	731342073 [38-48]	0	1241.67	11
FALSE	High	Unambiguous	ILNLINNMPGLNTLGISIAR	[K].ILNLINNMPGLNTLGISIAR.[A]	1xOxidation [M8]	1xOxidation [M8]			0.0215147	0	0.423	1	1	1	A0A2G3C5L3	A0A2G3C5L3	A0A2G3C5L3 [50-69]	0	2153.21	20
FALSE	High	Unambiguous	TGGPFGTMR	[KR].TGGPFGTMR.[FCLHYQKI]	1xOxidation [M8]	1xOxidation [M8]			0.136151	0.00292848	0.123	5	180	2	C3VQ49; 731359393; A0A2G2WJ41; A0A2R6P7L3; 731355965	Q9SMD3; K6ZYP6; Q5JBR8; M9V4H8; A0A0D3MWN6; A0A2C9V196; Q96399; A0A060N2B3; M9V5V2; A0A0D3MW78; A0A1S3WYG6; A0A166DFE9; R0GR27; A0A2H3Y2C6; A0A0D3MX97; A0A2K1Z169; A0A2R6PXQ9; A0A2R6QT82; A0A291NVZ6; A0A2L0RIT9; A0A067G3X2; A0A2K1Z165; A0A1U8GX01; A0A251VGB9; I2FJZ6; A0A078H5T6; C0KKH6; C3VQ49; A0A2H3XH20; A9P9V0; A0A022PVQ5; A1BQI2; V4SGF2; Q1W3C7; A0A087HLV2; A0A1D1XU38; K7AFX9; Q8W3J5; O22323;…	C3VQ49 [53-61]; 731359393 [53-61]; A0A2G2WJ41 [53-61]; A0A2R6P7L3 [53-61]; 731355965 [53-61]	0	939.435	9
FALSE	High	Unambiguous	LYMEARPMEEGLAEAIDEGR	[R].LYMEARPMEEGLAEAIDEGR.[IV]	1xOxidation [M8]	1xOxidation [M8]			0.00408862	0	0.693	1	15	1	A0A251STB4	B9SD38; A0A1D1Z1H1; K4CL74; A0A2J6LVB1; A0A2G2W631; A0A0J8BGW2; A0A0E0KM97; A0A199V0A3; A0A2P2MJI9; O23755; A0A2P5FD05; M0SK19; A0A103Y4H2; K4CL75; A0A251STB4	A0A251STB4 [1001-1020]	0	2296.06	20
FALSE	High	Unambiguous	SLGLNYNMEGLTGNTLDSHR	[K].SLGLNYNMEGLTGNTLDSHR.[L]	1xOxidation [M8]	1xOxidation [M8]			0.0183354	0	0.449	1	1	1	731316086	731316086	731316086 [91-110]	0	2208.03	20
FALSE	High	Selected	VSEQFTAMFR	[R].VSEQFTAMFR.[R]	1xOxidation [M8]	1xOxidation [M8]			0.0635071	0.000962316	0.247	5	256	1	731325985; A0A223HBR2; 731360530; J3LJ13; 731348756	A0A1U8HY47; A0A2G9HY56; M1BNF0; A0A0E0FK81; A0A251SNE7; B9I2F1; A0A1Y1I761; A0A1U8JUU9; A0A2H5NS51; N0DT81; Q40106; P28551; A0A2H5NCY8; A0A1D5X8S9; Q43697; A0A2H5NDH5; A0A178VS27; A0A1D5VCW1; P11482; B8ALG6; 731325985; A0A1U8JEV9; Q6VAF7; P29516; A0A0E0JW01; A0A2H5N0Y2; A0A251ST28; P18025; Q0ZUM9; A0A1D6C8W6; A0A067JZL4; Q65C76; A0A2G9FXJ1; A0A078FPV3; A3ANA0; E1CBS2; A0A2I4FGF9; A0A251N950; A0A1…	731325985 [381-390]; A0A223HBR2 [381-390]; 731360530 [386-395]; J3LJ13 [381-390]; 731348756 [381-390]	0	1231.58	10
FALSE	High	Selected	TAGPPVVMNPISR	[R].TAGPPVVMNPISR.[QR]	1xOxidation [M8]	1xOxidation [M8]			0.184034	0.00627731	0.074	1	124	1	A0A067K1B2	A0A199V1A0; B6SHY0; M1CLM7; A0A2H3Z709; A0A2G2YNQ7; A0A218WFV6; A0A2H3X6P9; A0A059ABZ4; A0A2R6S225; A0A0D3GC16; Q2HIQ2; A0A0A9LSJ4; R0IJU5; M1C6M0; A0A067K1B2; K3Y0F5; M1CLM8; B9S0H2; M4EWU5; A0A2I4FH50; A0A2J6K702; C6SZW7; M4C9Q4; A0A0B0MGC6; A0A1U8KVE4; W9RTH4; F6HKZ7; A0A118K7E3; A0A068VCS9; A0A1R3HLZ6; A0A1R3HLU9; A0A0D3DZT6; I1KW16; A0A2P5W1F2; A0A078FL74; A0A1U8HZW9; Q9MAL8; Q8GXJ9; A0A1S3C…	A0A067K1B2 [978-990]	0	1354.71	13
FALSE	High	Unambiguous	NGPLILEMDTYR	[KR].NGPLILEMDTYR.[Y]	1xOxidation [M8]	1xOxidation [M8]			0.101973	0.00224036	0.17	1	137	4	Q852R9	A0A1S3C2W9; V7C8V3; A0A2G5D9U5; A0A2N9EC57; A0A061E6P1; G5DW52; A0A1J3HUV8; A0A1J3C7I8; A0A0B2RAB4; P52903; A0A067JBT3; A0A166E9T6; A0A2P2JKW6; A0A078HN39; A0A2R6PBF4; A0A1J3K586; A0A1S2Z8M6; Q852R8; Q852S0; A0A0D2SDF0; A0A1J3J0D9; A0A1S3U8M3; A0A1S4ALQ5; V4KLQ6; V4ME43; A0A1S4C373; A0A0L9TF19; B9S2H9; A0A078FT15; A0A2G9HKI3; V7CHA1; A0A2J6K185; G7LEP9; A0A0R5QM77; V4MRI2; A0A2R6QR20; A0A0D2SJL8;…	Q852R9 [282-293]	0	1437.7	12
FALSE	High	Unambiguous	FSYGEPMNVESTTQALCDLALR	[R].FSYGEPMNVESTTQALCDLALR.[F]	1xOxidation [M7]; 1xiodoTMT6plex [C17]	1xOxidation [M7]; 1xiodoTMT6plex [C17]			0.000878694	0	0.943	1	1	1	731361751	731361751	731361751 [101-122]	0	2790.36	22	0.717	0.803	1.25	0.573	1.06	-0.48	-0.32	0.32	-0.8	0.08	111.1	79.6	89.1	138.8	63.6	117.8	191.9	137.6	154	239.8	109.9	203.5	138	77.3	103.4	125.7	109.9	124.1	1
FALSE	High	Unambiguous	YLTASAMFR	[R].YLTASAMFR.[GE-]	1xOxidation [M7]	1xOxidation [M7]			0.0907273	0.00187066	0.189	5	257	1	731325985; A0A223HBR2; 731360530; J3LJ13; 731348756	A0A2G9HY56; A0A151UFD6; M1BNF0; A0A0E0FK81; A0A251SNE7; B9I2F1; A0A1Y1I761; A0A2G9FZ19; B1PBW2; P33632; Q40106; P28551; A0A2H5NCY8; A0A1D5X8S9; Q43697; A0A2H5NDH5; A0A178VS27; A0A1D5VCW1; Q9ZRB1; A0A0A0YSN6; F6HKY1; B8ALG6; 731325985; A0A1U8JEV9; A0A2G9GI21; C5XMJ4; B3TKD1; P29516; A0A0E0JW01; P18025; Q0ZUM9; F6HLZ6; A0A1D6C8W6; A0A067JZL4; A0A0C9S5R5; P33631; Q65C76; A0A2G9FXJ1; A3ANA0; E1CBS2; …	731325985 [310-318]; A0A223HBR2 [310-318]; 731360530 [315-323]; J3LJ13 [310-318]; 731348756 [310-318]	0	1075.52	9
FALSE	High	Unambiguous	FKADDKMGHAQVNLQPIVSAAR	[R].FKADDKMGHAQVNLQPIVSAAR.[L]	1xOxidation [M7]	1xOxidation [M7]			0.0727082	0.000962316	0.225	1	1	1	A0A2I0KSN0	A0A2I0KSN0	A0A2I0KSN0 [77-98]	2	2412.25	22
FALSE	High	Unambiguous	DVFVKHMGLTDKDIVALSGGHTLGR	[R].DVFVKHMGLTDKDIVALSGGHTLGR.[CA]	1xOxidation [M7]	1xOxidation [M7]			0.0148757	0	0.483	1	7	1	A0A2R6P7L3	Q1W3C7; D8R8N9; H9BF88; D8QQ91; A0A2R6P7L3; A0A0N7H509; F4YFJ2	A0A2R6P7L3 [143-167]	2	2682.4	25
FALSE	High	Unambiguous	NNAFIDMSNTTR	[R].NNAFIDMSNTTR.[A]	1xOxidation [M7]	1xOxidation [M7]			0.149309	0.00333266	0.108	1	1	1	731312253	731312253	731312253 [18-29]	0	1399.63	12
FALSE	High	Unambiguous	LVELLMHPAPSVLIPALR	[R].LVELLMHPAPSVLIPALR.[T]	1xOxidation [M6]	1xOxidation [M6]			0.0524835	0	0.278	1	3	2	731320622	731320622; A0A1S3BY20; A0A0A0LJV2	731320622 [290-307]	0	1985.16	18
FALSE	High	Unambiguous	TLFSRMGLSDRDIVALSGGHTLGR	[R].TLFSRMGLSDRDIVALSGGHTLGR.[A]	1xOxidation [M6]	1xOxidation [M6]			0.132843	0.00257247	0.127	1	2	1	V4P2D5	V4P2D5; D7MBQ9	V4P2D5 [139-162]	2	2575.34	24
FALSE	High	Unambiguous	YFVDLMNR	[KR].YFVDLMNR.[Q]	1xOxidation [M6]	1xOxidation [M6]			0.147484	0.00292848	0.11	2	11	1	731313637; 731313641	A0A2C9WF26; A0A067KKA6; A0A2J6JUU0; A0A2C9WHF4; A0A0K9QLA8; A0A2C9U230; A0A059BYP5; A0A251VGB2; 731313637; A0A0K9QXY9; 731313641	731313637 [259-266]; 731313641 [260-267]	0	1073.51	8
FALSE	High	Unambiguous	TVLILMSDTGGGHRASAEAIKEAFR	[K].TVLILMSDTGGGHRASAEAIKEAFR.[I]	1xOxidation [M6]	1xOxidation [M6]			0.210697	0.00721273	0.052	1	1	1	A0A0D6R6J8	A0A0D6R6J8	A0A0D6R6J8 [13-37]	2	2646.37	25
FALSE	High	Unambiguous	IASISMMSQEELGAAREER	[R].IASISMMSQEELGAAREER.[Q]	1xOxidation [M6]	1xOxidation [M6]			0.00824262	0	0.579	1	1	1	731334119	731334119	731334119 [280-298]	1	2124.01	19
FALSE	High	Unambiguous	VFDCMQKPAFVFDGR	[K].VFDCMQKPAFVFDGR.[N]	1xOxidation [M5]; 1xiodoTMT6plex [C4]	1xOxidation [M5]; 1xiodoTMT6plex [C4]			0.0153402	0	0.478	1	1	1	A0A0S3T1M9	A0A0S3T1M9	A0A0S3T1M9 [433-447]	0	2105.05	15	1.146	1.057	1.315	0.658	1.352	0.2	0.08	0.4	-0.6	0.43	91.9	105.3	97.2	120.9	60.5	124.2	158.8	181.9	167.8	208.9	104.5	214.6	114.2	102.2	112.7	109.5	104.5	130.9	1
FALSE	High	Unambiguous	GMTGMVSIGDVVR	[K].GMTGMVSIGDVVR.[A]	1xOxidation [M5]	1xOxidation [M2; M5]			0.0230205	0	0.412	1	1	1	731346319	731346319	731346319 [169-181]	0	1337.66	13
FALSE	High	Unambiguous	LGEAMGLAVTGEGATSTER	[K].LGEAMGLAVTGEGATSTER.[S]	1xOxidation [M5]	1xOxidation [M5]			0.000380705	0	1.079	1	1	2	731350661	731350661	731350661 [188-206]	0	1865.89	19
FALSE	High	Unambiguous	VFFDMEVGNQPAGR	[R].VFFDMEVGNQPAGR.[I]	1xOxidation [M5]	1xOxidation [M5]			0.00685389	0	0.609	1	1	7	731357859	731357859	731357859 [6-19]	0	1582.73	14
FALSE	High	Unambiguous	LDDSMLISEDQFLAQHPGPVR	[K].LDDSMLISEDQFLAQHPGPVR.[I]	1xOxidation [M5]	1xOxidation [M5]			0.0858419	0.000962316	0.198	1	1	1	M5WFQ6	M5WFQ6	M5WFQ6 [699-719]	0	2384.16	21
FALSE	High	Unambiguous	VAEAMEVLR	[K].VAEAMEVLR.[NTSMKQ]	1xOxidation [M5]	1xOxidation [M5]			0.145681	0.00292848	0.112	2	240	1	A0A2H5P9E1; 731314870	A0A251UXA6; Q9M6E4; A0A2G9G3A9; A0A251MX68; A0A1R3GAX8; A0A2P5S2M5; A0A2I4E2V7; A0A0E0EPI0; A0A0P0XF64; A0A0B0P0A0; A0A0P0XEV9; A0A2C9V4D5; A0A1D6I0G9; M8A5D6; A0A0D2SE07; A0A1U8ARK1; A0A287WPW6; A0A0N7KQC7; A0A1Q3BI77; W9RY32; A0A2R6WQ95; A0A1U8J310; A0A2H3XU90; A0A199V0W1; A0A2H5NH94; A0A2K1JXS5; U5FRW2; A0A1D6ELG5; K3ZRC0; A0A2P5XAP1; A0A0K9RZM0; A0A067GWK3; A0A1R3KRZ7; A0A0E0EK55; A0A1B6QBF0;…	A0A2H5P9E1 [645-653]; 731314870 [628-636]	0	1033.53	9
FALSE	High	Unambiguous	IEYSMQLNASR	[K].IEYSMQLNASR.[IL]	1xOxidation [M5]	1xOxidation [M5]			0.0362882	0	0.338	1	235	1	A0A0A7B1S3	A0A200QT93; A0A0V0HNB8; A0A0C9RVF7; F6HMT9; A0A175Y968; A0A1J6I7D4; A0A2K1R8C4; A0A0B0NQZ3; Q84T14; A0A067LPH6; I3S5S1; A0A1U7YVS7; A0A0K9RV86; A0A0D2MY14; A0A2J6JW30; A0A0L9VQD9; I3RZI4; Q40272; N1QP32; A0A251NZ17; J3L2J5; I1KPH3; A0A251TI66; W5CSB4; A0A103XFY2; A0A0D2Q1C8; A0A2G3ADM6; A9NNQ7; A0A2I4EIU7; V4TM00; A0A1S2YJM5; A0A1U8F810; A0A0D2Q1D0; 731344477; A0A1D5WJH0; A0A0D9V3Q9; A0A0A7B1S3; …	A0A0A7B1S3 [69-79]	0	1327.63	11
FALSE	High	Unambiguous	AHTDMVTAIATPIDNSDMIVTASR	[R].AHTDMVTAIATPIDNSDMIVTASR.[D]	1xOxidation [M5]	1xOxidation [M5]			0.0320883	0	0.358	1	6	1	A0A0K9RIC1	A0A2H5Q9B7; A0A2P5AHD4; A0A067F699; A0A2P5DF52; 731334235; A0A0K9RIC1	A0A0K9RIC1 [13-36]	0	2546.22	24
FALSE	High	Unambiguous	RGGYMEVTGFSPEIR	[K].RGGYMEVTGFSPEIR.[ED]	1xOxidation [M5]	1xOxidation [M5]			0.00961257	0	0.554	1	18	1	K4BN60	A0A2R6QF70; A0A2R6R0I7; A0A2G3A3T6; A0A1S3CBU3; A0A1S4AAP9; A0A1S3CC99; A0A2G2WPD1; 731347888; A0A164X8N1; K4BN60; A0A2G3D1D6; A0A0A0LC12; A0A1J6L780; A0A1S3CDI5; A0A0V0IM68; A0A1S3ZP91; A0A142I5C3; A0A1U8FTE1	K4BN60 [401-415]	1	1714.82	15
FALSE	High	Unambiguous	VFSQMAENER	[K].VFSQMAENER.[T]	1xOxidation [M5]	1xOxidation [M5]			0.116032	0.00257247	0.149	1	1	1	731318984	731318984	731318984 [334-343]	0	1226.55	10
FALSE	High	Unambiguous	VTNMATGAQVTVR	[R].VTNMATGAQVTVR.[I]	1xOxidation [M4]	1xOxidation [M4]			0.0203562	0	0.432	1	1	10	731329194	731329194	731329194 [89-101]	0	1363.7	13
FALSE	High	Unambiguous	TIAMDGTEGLVR	[R].TIAMDGTEGLVR.[G]	1xOxidation [M4]	1xOxidation [M4]			0.0221865	0	0.418	3	248	8	A0A1D1YVH1; M0UCJ4; 731341013	A0A2N9FMY0; M7Y940; A0A0A0KTA5; F2D5B2; O82722; D7M1G9; A0A0D2VYM2; A0A1D1YVH1; A0A061E5Q6; A0A2I0KLQ5; A0A0A0KPJ2; A0A2H3XR79; A0A1U8FHC9; A0A0K9NYL5; A0A1D1Z6V8; A0A0D2S1Z3; K3Z538; A0A059BEJ4; A0A287LBT9; P37399; A0A2I0XEZ3; A0A1D5SCJ1; A0A1E5WI54; A0A0D2V4L6; A0A0D2VYM6; A0A1D6NFC0; A0A0V0IJL8; A0A1J6K2R3; B8A7M8; A0A0E0L5G3; A0A1U8FNM3; P19023; A0A2G5F6M9; A0A0D3EGT2; A0A1U8F1W2; A0A0D3B0C3;…	A0A1D1YVH1 [114-125]; M0UCJ4 [135-146]; 731341013 [132-143]	0	1278.64	12
FALSE	High	Rejected	HAGMAVAGLAADGR	[R].HAGMAVAGLAADGR.[Q]	1xOxidation [M4]	1xOxidation [M4]			0.0982789	0.00187066	0.176	0	13	1		A0A087GRD6; A0A0D3C289; D7LFI4; A0A1S2XHX9; A0A087HM16; A0A0D6R5R7; A0A078IBD0; R0FX62; A0A1J3EVY2; A0A1P8AX55; A0A178VXR9; A0A0C9SAC7; A0A1J3GL69		0	1312.64	14
FALSE	High	Rejected	AIGMHALLLDR	[KR].AIGMHALLLDR.[F]	1xOxidation [M4]	1xOxidation [M4]			0.185169	0.00627731	0.073	0	2	2		A0A2G5D2E1; A0A0A9CSQ1		0	1225.67	11
FALSE	High	Unambiguous	SGGMSNELYNTVAR	[K].SGGMSNELYNTVAR.[V]	1xOxidation [M4]	1xOxidation [M4]			0.0283745	0	0.378	1	7	1	731322146	M5XNZ7; A0A2I4F1Y7; 731322146; A0A2I4HPL3; A0A0K9RSM1; A0A1U8AY07; C0PRY4	731322146 [176-189]	0	1514.69	14
FALSE	High	Unambiguous	LREMSGSNIFAEGDRVEPR	[K].LREMSGSNIFAEGDRVEPR.[D]	1xOxidation [M4]	1xOxidation [M4]			0.173057	0.00596827	0.084	1	1	1	731338884	731338884	731338884 [259-277]	2	2179.06	19
FALSE	High	Unambiguous	ISKMEADLQAADR	[R].ISKMEADLQAADR.[L]	1xOxidation [M4]	1xOxidation [M4]			0.0431075	0	0.31	1	1	1	731316859	731316859	731316859 [114-126]	1	1463.72	13
FALSE	High	Unambiguous	NISRPSAPQFDDAPDYVNDIEEEMIR	[R].NISRPSAPQFDDAPDYVNDIEEEMIR.[A]	1xOxidation [M24]	1xOxidation [M24]			0.000975538	0	0.926	1	1	1	731331209	731331209	731331209 [189-214]	0	3037.38	26
FALSE	High	Unambiguous	VVDLCPGCSANGLDLSQEAFSMIADPNAGR	[R].VVDLCPGCSANGLDLSQEAFSMIADPNAGR.[I]	1xOxidation [M22]; 2xiodoTMT6plex [C5; C8]	1xOxidation [M22]; 2xiodoTMT6plex [C5; C8]			0.00201566	0	0.808	1	1	1	731352762	731352762	731352762 [116-145]	0	3724.85	30	0.456	0.376	0.566	0.624	1.689	-1.13	-1.41	-0.82	-0.68	0.76	127.4	58.1	48	72	79.4	215.1	288.4	131.5	108.6	163.1	179.8	486.9	207.4	73.9	72.9	85.5	179.8	297	1
FALSE	High	Unambiguous	TGQALVIGLYDEPVTPGQCNMIVER	[K].TGQALVIGLYDEPVTPGQCNMIVER.[L]	1xOxidation [M21]; 1xiodoTMT6plex [C19]	1xOxidation [M21]; 1xiodoTMT6plex [C19]			0.0754413	0.000962316	0.219	1	2	1	731317399	731317401; 731317399	731317399 [99-123]	0	3048.57	25	1.035	1.016	1.559	0.647	1.061	0.05	0.02	0.64	-0.63	0.09	95	98.3	96.5	148.1	61.4	100.8	287.5	297.6	292	448.3	185.9	305.1	206.8	167.2	196.1	235	185.9	186.1	1
FALSE	High	Unambiguous	VNPSGDARPPPLGGLSSLPEMDR	[R].VNPSGDARPPPLGGLSSLPEMDR.[M]	1xOxidation [M21]	1xOxidation [M21]			0.0455608	0	0.301	1	1	1	731357482	731357482	731357482 [345-367]	0	2378.18	23
FALSE	High	Unambiguous	VMCGHAGANLVPLVASNR	[R].VMCGHAGANLVPLVASNR.[I]	1xOxidation [M2]; 1xiodoTMT6plex [C3]	1xOxidation [M2]; 1xiodoTMT6plex [C3]			0.0175628	0	0.456	1	2	1	I0YLL7	I0YLL7; I0YLL3	I0YLL7 [200-217]	0	2154.15	18	1.272	1.343	1.249	0.668	1.08	0.35	0.42	0.32	-0.58	0.11	90.7	115.4	121.8	113.3	60.6	98	181	230.3	243	226	120.9	195.6	130.2	129.4	163.2	118.5	120.9	119.3	1
FALSE	High	Unambiguous	YMVLQGEPGAVIR	[K-].YMVLQGEPGAVIR.[GLRV]	1xOxidation [M2]	1xOxidation [M2]			0.0103488	0	0.542	1	255	22	731317399	731317401; A0A1J6I2I5; A0A2R6PUW2; Q9SNW5; A0A067ED73; A0A251V400; A0A0D3A3I1; J3N1Q9; V4TVJ4; A0A1Z5R3G7; A1Z294; A0A2P6RJY2; A0A1J7FZD4; A0A0K9QL47; A4KA53; Q9M7N0; A0A2R6Q509; A0A1J7HB80; A0A2G2VGU3; A0A0K9QD73; A4KA61; A0A0D3DWF5; A0A151TKB0; A0A2C9UAN5; G9B5V0; A5H0M3; P35082; A0A1U8PW33; B9RKF5; A0A0D3E3J2; A0A078IFC4; A0A022PZT8; A1KXK0; A0A2K2C067; Q9M7M8; A0A1S4AK54; A0A1U8MUB3; D3K177; …	731317399 [74-86]	0	1448.76	13
FALSE	High	Unambiguous	QMGLTDQDIVALSGGHTLGR	[K].QMGLTDQDIVALSGGHTLGR.[C]	1xOxidation [M2]	1xOxidation [M2]			0.000347155	0	1.094	1	6	6	731355965	Q42459; A0A022RBB3; Q94CF7; 731355965; A0A0K9RD46; A0A022R876	731355965 [148-167]	0	2085.04	20
FALSE	High	Unambiguous	QMGLSDQDIVVLSGGHTLGR	[K].QMGLSDQDIVVLSGGHTLGR.[C]	1xOxidation [M2]	1xOxidation [M2]			0.0547923	0.00054243	0.271	1	1	2	A0A2G2WJ41	A0A2G2WJ41	A0A2G2WJ41 [148-167]	0	2099.05	20
FALSE	High	Unambiguous	QMNPGATWIVYANPGQTAAR	[R].QMNPGATWIVYANPGQTAAR.[I]	1xOxidation [M2]	1xOxidation [M2]			0.00014057	0	1.241	1	1	1	731331165	731331165	731331165 [50-69]	0	2162.04	20
FALSE	High	Unambiguous	QMGLNDQDIVALSGGHTLGR	[K].QMGLNDQDIVALSGGHTLGR.[C]	1xOxidation [M2]	1xOxidation [M2]			0.000107905	0	1.284	1	1	4	731359393	731359393	731359393 [148-167]	0	2098.03	20
FALSE	High	Unambiguous	TMEINPENPIMEELR	[KR].TMEINPENPIMEELR.[K]	1xOxidation [M2]	1xOxidation [M2]			0.00617349	0	0.626	1	103	1	A0A151S4L4	A0A0D2NKS7; A0A103XYG1; A0A088AZU7; A0A2R6PQB8; M0RF29; A0A061F4G1; A0A290YK42; A0A2P0JAG7; G7K4R2; A0A2C9VY21; A0A1U8KPM5; B6EBD6; F6HCU9; A0A0B0P7S1; A0A251ST32; A0A0B0P9T0; A0A2K3P5V8; G1EN32; A0A022R4F5; A0A059BWW7; A0A2R6QT48; A0A2R6QT40; B9T1Q8; S8DFN4; A0A1U8KPL8; A0A1D1Z6E1; A0A2K3NGM9; A0A2P5ELD6; A0A0B2QUV0; D6C500; A0A2N9J2E3; A0A1U7ZIF9; B6EBD7; I1M6E1; A0A151S4L4; A0A2P2M1B8; M0TZS7;…	A0A151S4L4 [610-624]	0	1831.86	15
FALSE	High	Unambiguous	SMQAIVEQVR	[R].SMQAIVEQVR.[I]	1xOxidation [M2]	1xOxidation [M2]			0.108442	0.00224036	0.16	1	1	1	731342073	731342073	731342073 [180-189]	0	1176.6	10
FALSE	High	Unambiguous	IMNVIGEPIDHR	[R].IMNVIGEPIDHR.[G]	1xOxidation [M2]	1xOxidation [M2]			0.0351893	0	0.343	2	12	6	731341013; A0A175YRR8	A0A2G5F6M9; G1JSJ8; A0A2P6R1E7; A0A2G5F6L1; A0A0K9QAM7; A0A2P6P210; A0A2G5F6R8; 731341013; A0A2G5F6N3; A0A0K9RQ86; A0A175YRR8; A0A175YHH7	731341013 [166-177]; A0A175YRR8 [32-43]	0	1409.72	12
FALSE	High	Unambiguous	TMPVEDHVEPSYFEMPSVSAETSR	[K].TMPVEDHVEPSYFEMPSVSAETSR.[S]	1xOxidation [M2]	1xOxidation [M2]			0.00539225	0	0.648	1	1	1	731327209	731327209	731327209 [331-354]	0	2741.21	24
FALSE	High	Rejected	VMANQEAVDIAR	[K].VMANQEAVDIAR.[RK]	1xOxidation [M2]	1xOxidation [M2]			0.076375	0.000962316	0.217	0	26	1		K7M9R7; I1MDW9; A0A1S3CQR0; A0A0S3S214; A0A0R0JU00; V7CQ92; A0A2I4GFD6; A0A0L9VH32; A2Q6E4; A0A2I4GFC9; A0A2P5CKH5; A0A1S3VKX5; A0A2P5G1N7; A0A2P5CKG3; V7BR11; I1KUC9; A0A2P5A438; A0A2I4DZ64; A0A2K3L509; A0A2P4ISQ8; A0A2I4DZ50; A0A0B2SD91; G7KB93; A0A2I4DSK0; A0A0A0LHJ2; A0A2N9FJ90		0	1332.66	12
FALSE	High	Unambiguous	LMDAVDEYIPDPVR	[K].LMDAVDEYIPDPVR.[QV]	1xOxidation [M2]	1xOxidation [M2]			0.0667099	0.000962316	0.239	2	91	1	731317922; A0A218XR74	C6T9K9; A0A0D2SY38; A0A2C9VU30; A0A2G2ZWE9; A0A2G2XVC5; A0A0A0K909; A5BV56; A0A0K9Q7G6; J3LUT2; A0A0V0IBV9; A0A2K3P8S5; M0ZWY7; A0A078GB51; C6T8W5; R0H6S8; A0A0L9U8T5; K4CUX6; A0A0D3E058; A0A078G6J1; A0A0D2PLR5; K4A9U9; A0A0B0PC77; A0A2C9WMS6; A0A1J7HTE2; Q9FUZ6; A0A2N9GWL3; A0A2K1XVA6; I1GKU6; 731317922; D7MIK9; A0A0D9W1G4; A0A1D6GD78; A0A2G5DMM7; A0A2P5SQK5; Q10AI6; A0A1U8LSB5; A0A2K1XVA5; A0A1…	731317922 [249-262]; A0A218XR74 [245-258]	0	1648.79	14
FALSE	High	Unambiguous	VMQNNAAVFR	[RK].VMQNNAAVFR.[T]	1xOxidation [M2]	1xOxidation [M2]			0.19213	0.00652397	0.067	1	132	2	731337301	A0A0D2TYL9; A0A2G3AAH8; A0A0K9NU31; M0TDM1; A0A0E0LGQ8; A0A199V9W0; A0A0A9RAJ0; A0A2K3PI34; A0A0B0PMX6; A9TP02; A0A0S3R454; A0A0E0AK20; B9FVD6; A0A1D6HRY4; A0A199VUR0; A0A200Q207; A0A078GVQ2; A0A0D2T1P6; A0A251S412; D7MLY6; I1J8V9; A0A2P5S8U0; A0A0D9WVA6; A0A1U7Y773; A0A0L9TPB1; A0A176WLL3; A0A1E5VME1; A0A1U8FPG4; A0A150GEU4; A0A2G3D7Q7; V4MDN9; A0A0C9QU62; A0A1U8JUC8; A0A0A7M870; A0A2P5FXL5; A0A…	731337301 [509-518]	0	1165.58	10
FALSE	High	Rejected	FMVIQGEPGAVIR	[K].FMVIQGEPGAVIR.[G]	1xOxidation [M2]	1xOxidation [M2]			0.0104127	0	0.541	0	5	4		A0A1U8JHY4; Q7Y253; G9B5N7; A0A2P5R9P0; G9B5W4		0	1432.76	13
FALSE	High	Unambiguous	LQQQCPQGSASTLVVPMDTR	[R].LQQQCPQGSASTLVVPMDTR.[T]	1xOxidation [M17]; 1xiodoTMT6plex [C5]	1xOxidation [M17]; 1xiodoTMT6plex [C5]			0.0208631	0	0.428	1	1	1	731321380	731321380	731321380 [230-249]	0	2504.28	20	0.814	0.849	0.959	0.857	1.207	-0.3	-0.24	-0.06	-0.22	0.27	105.5	85.9	89.6	101.2	90.4	127.4	130.1	105.9	110.5	124.8	111.5	157.1	93.6	59.5	74.2	65.4	111.5	95.8	1
FALSE	High	Unambiguous	EESSYEGNYNSYGRFAMGLNNGGGGGYNDRFMK	[K].EESSYEGNYNSYGRFAMGLNNGGGGGYNDRFMK.[L]	1xOxidation [M17]	1xOxidation [M17]			0.156839	0.00409645	0.1	1	3	1	W8E7P1	W8EB93; K7MEQ8; W8E7P1	W8E7P1 [218-250]	2	3657.54	33
FALSE	High	Unambiguous	IELFAQARDCLLPMGITSENVAHR	[K].IELFAQARDCLLPMGITSENVAHR.[F]	1xOxidation [M14]; 1xiodoTMT6plex [C10]	1xOxidation [M14]; 1xiodoTMT6plex [C10]			0.0341237	0	0.348	1	1	1	A0A199UJ48	A0A199UJ48	A0A199UJ48 [30-53]	1	3029.59	24	1.152	1.197	1.39	0.755	1.159	0.2	0.26	0.48	-0.4	0.21	90.2	103.9	107.9	125.4	68.1	104.6	264.7	304.9	316.8	368	200	306.9	190.4	171.3	212.7	192.9	200	187.2	1
FALSE	High	Unambiguous	CGNVASILSFNDVMER	[R].CGNVASILSFNDVMER.[D]	1xOxidation [M14]; 1xiodoTMT6plex [C1]	1xOxidation [M14]; 1xiodoTMT6plex [C1]			0.114613	0.00257247	0.151	1	2	1	D8TDC5	D8RQD2; D8TDC5	D8TDC5 [263-278]	0	2100.04	16	0.938	0.913	0.947	0.709	0.949	-0.09	-0.13	-0.08	-0.5	-0.08	110	103.2	100.4	104.2	78	104.3	225.5	211.6	205.8	213.6	160	214	162.2	118.9	138.2	112	160	130.5	1
FALSE	High	Unambiguous	TQVTVEYYNDNGAMVPVR	[K].TQVTVEYYNDNGAMVPVR.[V]	1xOxidation [M14]	1xOxidation [M14]			0.00401387	0	0.696	1	99	1	A0A0D2RES8	B9RN65; 731336846; A0A0S3S040; V4TBY9; A0A0B2R3E0; A0A2G9I0K1; A0A2P2LZS5; A0A1S3TPW0; Q4H1G3; A0A059DEJ0; A0A1U8P0L0; C6TNG2; A0A2I0KJD9; A0A2N9HK39; A0A2P5WWU3; A0A0D3B8Y9; A0A059DE20; V4L2F1; A0A1U8DXE0; A0A067H499; A0A1J3D2A7; V4LHS9; D7M483; D3Y1Y5; A0A067JWS1; A0A2G9FYS7; A0A2G3AVE4; C6THI6; A0A2K1XU18; A0A2G9HPL3; I1NBG9; A0A1S4DWS2; W9RAW2; A0A1J3G626; M4C9N5; A0A2G2UVA4; A7LBN2; A0A1J3EP…	A0A0D2RES8 [175-192]	0	2071.98	18
FALSE	High	Unambiguous	NSTVVAGGGAIDMEVSR	[K].NSTVVAGGGAIDMEVSR.[H]	1xOxidation [M13]	1xOxidation [M13]			0.153027	0.00373344	0.104	1	1	1	731328839	731328839	731328839 [405-421]	0	1678.81	17
FALSE	High	Selected	LAYVALDFEEEMATSQSSSSIEK	[K].LAYVALDFEEEMATSQSSSSIEK.[S]	1xOxidation [M12]	1xOxidation [M12]			0.132028	0.00257247	0.128	1	1	1	A0A096P7W5	A0A096P7W5	A0A096P7W5 [218-240]	0	2551.18	23
FALSE	High	Unambiguous	FNTIGVSDAISMGTR	[R].FNTIGVSDAISMGTR.[G]	1xOxidation [M12]	1xOxidation [M12]			0.0270122	0	0.386	1	72	1	A0A200R2E1	A0A1D1YZH9; A0A1J3ET87; A0A1U8EW31; A0A2C9UE54; W9R9B5; A0A2R6S0S6; A0A2P2JPR8; A0A118JU55; A0A2K2B8Q8; A0A1J3K3C9; A0A2P5DHU7; B9H085; A0A0K9NLI2; A0A0A0L6U0; G7IRL3; A0A067JC64; M4DEV1; M4EHV2; A0A251SF80; A0A022QV93; B9GMG3; K4C234; A0A078I644; A0A2R6R970; S8CBL9; A0A2J6K9P4; A0A078FY76; A0A1S3ZK66; K4DF90; A0A2G2Y9A0; A0A2G3B349; A0A1S3VKE4; A0A2G9HGU1; D7L507; A0A1S2XCF6; A0A0L9VFM8; A0A0V0H…	A0A200R2E1 [141-155]	0	1584.77	15
FALSE	High	Unambiguous	ADRDESSPYAAMLAAQDVSQR	[K].ADRDESSPYAAMLAAQDVSQR.[C]	1xOxidation [M12]	1xOxidation [M12]			0.0042163	0	0.688	2	109	1	A0A162ADI1; A0A2K1YH76	A0A1S3X3E1; A0A251N9N1; A0A162ADI1; A0A1U8EGK0; A0A2P5WEL8; A0A061GKY0; A0A061GW32; A0A2P5XLR8; A0A0D2SYF1; A0A2G9GC36; A0A2P5RQ37; M0TWT0; A0A218XCW4; A0A118K3B3; A9PIB5; A0A199VAK1; A0A2K2C1M8; A0A2P4LU54; A0A2I0HUF8; A0A218WUT2; A0A2G9HHT2; A0A2R6PY85; A0A251NPU5; A0A2P5SBA1; A0A2N9J0U8; A0A2P5QMV9; A0A2C9UF24; A0A1D1Z3U1; M5W2M2; A0A2N9EFI6; A0A2K1YH55; A0A2K2C1Q0; A0A218XC98; 731344994; A9PD…	A0A162ADI1 [1149-1169]; A0A2K1YH76 [63-83]	1	2297.05	21
FALSE	High	Unambiguous	GSDHLRGVFGHMGLSDKDIVALSGGHTLGR	[K].GSDHLRGVFGHMGLSDKDIVALSGGHTLGR.[C]	1xOxidation [M12]	1xOxidation [M12]			0.0223234	0	0.417	1	1	1	B1A3K6	B1A3K6	B1A3K6 [138-167]	2	3105.56	30
FALSE	High	Unambiguous	VSSGVNQAAGFMGR	[R].VSSGVNQAAGFMGR.[S]	1xOxidation [M12]	1xOxidation [M12]			0.0461246	0	0.299	1	1	1	731322733	731322733	731322733 [113-126]	0	1396.66	14
FALSE	High	Unambiguous	SFSDQGLSTTDMVALSGAHTIGQAR	[K].SFSDQGLSTTDMVALSGAHTIGQAR.[C]	1xOxidation [M12]	1xOxidation [M12]			0.0163133	0	0.468	1	2	1	731316489	731316489; O81266	731316489 [178-202]	0	2566.22	25
FALSE	High	Unambiguous	AFVAKGLSVGDMVALSGAHSIGR	[R].AFVAKGLSVGDMVALSGAHSIGR.[S]	1xOxidation [M12]	1xOxidation [M12]			0.0362882	0	0.338	1	1	1	A0A118JW68	A0A118JW68	A0A118JW68 [169-191]	1	2259.19	23
FALSE	High	Unambiguous	VSGPVVVADGMGGAAMYELVR	[-].VSGPVVVADGMGGAAMYELVR.[V]	1xOxidation [M11]; 1xAcetyl [N-Term]	1xOxidation [M11]; 1xAcetyl [N-Term]	A0A1E5VBA7 1xAcetyl [N-Term]	A0A1E5VBA7 1xAcetyl [N-Term]	0.134487	0.00292848	0.125	1	1	2	A0A1E5VBA7	A0A1E5VBA7	A0A1E5VBA7 [1-21]	0	2136.05	21
FALSE	High	Unambiguous	DAGVISGLNVMR	[K].DAGVISGLNVMR.[I]	1xOxidation [M11]	1xOxidation [M11]			0.0593529	0.00054243	0.258	1	170	1	731318762	A0A2H3YRJ8; A0A1J6KP74; A0A0D6R5C5; Q41374; A0A2H3XJ11; C5YZA1; A0A140CZC8; B6U1E4; P27322; A0A287P8H5; E2D555; A0A287P8H0; A0A1D5Y2X9; A0A2I4EV32; A0A2H3X0X4; M0ZI18; A0A0C9RYG3; A0A2R6P7V0; A0A1I9TK81; A0A172C1A5; B8LRY5; K7VW90; C5WPF7; A0A2R6PF91; K4D9L9; A2XF40; A0A1D5XLU9; A0A1J3G3Z2; A0A1J6LB17; Q84QJ3; J3LMG9; A0A072UM13; A0A1C9EIF2; A0A1D1Z153; Q67BD0; A0A1R3K3I3; A0A1S4E1V9; A0A0E0CYR7;…	731318762 [164-175]	0	1247.64	12
FALSE	High	Unambiguous	LDVAPSSNYTMDPITR	[K].LDVAPSSNYTMDPITR.[S]	1xOxidation [M11]	1xOxidation [M11]			0.0305477	0	0.366	1	2	1	731322090	731322090; 731322094	731322090 [157-172]	0	1795.85	16
FALSE	High	Unambiguous	FARKGLSLDEMVTLSGAHSIGR	[R].FARKGLSLDEMVTLSGAHSIGR.[S]	1xOxidation [M11]	1xOxidation [M11]			0.0410379	0	0.318	1	1	1	A0A2P4HUZ7	A0A2P4HUZ7	A0A2P4HUZ7 [164-185]	2	2361.23	22
FALSE	High	Unambiguous	TTLVANTSNMPVAAR	[R].TTLVANTSNMPVAAR.[E]	1xOxidation [M10]	1xOxidation [M10]			0.00529367	0	0.651	2	246	1	Q39442; A0A1E5VBA7	A0A067DVI5; O04054; A0A151SGF9; A0A1D6CRA6; A0A087SME3; C0PHC0; Q38676; A0A1D6SC42; E1ZT42; A9RGW5; R0GDS5; B3SGC7; A0A2H3XCP3; I0YKZ3; A0A0A7LU40; A0A0E0Q163; A0A022PZI2; A0A061G8X4; A0A1Y1I8P3; A0A2P5W5A3; Q39291; M1CTC4; W9S238; A0A061RM85; A0A0V0IQG7; A0A287XSJ3; A0A0P0AE40; A0A1J7IEI4; M8A7G5; M0RYR1; A0A2P6VKQ0; A0A2R6XJY8; A0A061QJE9; C1MIH4; A0A1J3DEQ8; A0A166EQ15; M4CHF0; A5BYV7; A0A1Y5I…	Q39442 [312-326]; A0A1E5VBA7 [258-272]	0	1561.8	15
FALSE	High	Unambiguous	AFATGGYAAMQR	[RK].AFATGGYAAMQR.[VI]	1xOxidation [M10]	1xOxidation [M10]			0.0478585	0	0.293	3	252	1	M5XCR9; A0A059BL19; A0A067KUZ2	A0A2P5XC84; A0A0P0VY65; A0A218X869; B9T0A7; T2DMJ6; A0A0A0L679; A0A218XAB8; A0A2P5EZE4; A0A0E0EMG7; J3LPE0; A0A0L9UZF5; A0A0A9JHN1; A0A2J6M612; A0A1D5TN87; A0A078G7H9; A0A2K2ACZ0; A0A0D6QVS2; D3YIJ4; A0A2I0HU62; A2XHI6; A0A0K9S2N1; A0A1S2Z6X5; A0A067XH53; K4D5G8; A0A199VM73; A0A0E0QBF6; A0A2H3XZ24; A0A0E0LW43; O24052; A0A1U8AJ62; A0A2H3XDQ3; A0A2P5R414; B9RJN2; R0IS21; V7BTN3; A0A2J6LK70; A0A2K2A…	M5XCR9 [318-329]; A0A059BL19 [244-255]; A0A067KUZ2 [226-237]	0	1259.58	12
FALSE	High	Unambiguous	NAIENYAYNMR	[KR].NAIENYAYNMR.[N]	1xOxidation [M10]	1xOxidation [M10]			0.0324854	0	0.356	1	253	16	731318762	F6HLD8; A0A1D5W3T1; A0A1J6KP74; A0A199W1V6; A0A1J6IP41; A0A151S7R0; A0A1Y1IIH5; A0A1U8IVE8; A0A1R3JR04; A0A1U8PHA9; A0A140CZC8; A0A1J6J259; P27322; A0A2J6KN06; A0A2I4FI38; A0A1D5Y2X9; I1R2A1; A0A2I4EV32; A0A2G3BK04; A0A2R6P7V0; I1PWC2; A0A172C1A5; M1CSI8; A0A2R6PF91; A0A2P5RBH9; A0A0F7CS07; A0A1B6PKD4; A0A1S2XU44; O48563; A0A0E0J5I6; A0A1J6LB17; Q84QJ3; A0A0D3BQP4; A7Y7I0; A0A1U7ZN79; V7BFT8; A0A…	731318762 [546-556]; [1421-1431]	0	1374.61	11
FALSE	High	Selected	MTNFCTNFQVDEIGR	[-].MTNFCTNFQVDEIGR.[V]	1xOxidation [M1]; 1xiodoTMT6plex [C5]	1xOxidation [M1]; 1xiodoTMT6plex [C5]			0.0444536	0	0.305	1	1	1	M8C108	M8C108	M8C108 [1-15]	0	2120.01	15	1.658	0.936	1.421	0.504	1.201	0.73	-0.09	0.51	-0.99	0.26	89.3	148.1	83.6	126.8	45	107.3	66.3	110	62.1	94.2	33.4	79.7	47.7	61.8	41.7	49.4	33.4	48.6	1
FALSE	High	Unambiguous	MGQLGVLSGNQGEIR	[K].MGQLGVLSGNQGEIR.[A]	1xOxidation [M1]	1xOxidation [M1]			0.00120242	0	0.892	1	1	9	731313639	731313639	731313639 [306-320]	0	1574.8	15
FALSE	High	Unambiguous	MLSPHILGEEHYNTAR	[R-].MLSPHILGEEHYNTAR.[G]	1xOxidation [M1]	1xOxidation [M1]			0.000717293	0	0.976	2	98	12	731341013; A0A175YRR8	D7M1G9; A0A0D2VYM2; A0A061E5Q6; A0A1U8FHC9; A0A0K9NYL5; A0A0D2S1Z3; A0A1U8EIM6; A0A0D2V4L6; A0A0D3EGT2; A0A0D3AH59; A0A0D3B0C3; A0A1S3CT27; A0A1U7Z806; C6GFP3; M4CP75; R0H666; Q8H135; F6HFL0; M4EIN3; G1JSJ8; A0A2P5S6E2; A0A087G5U2; A0A0D2TNE4; S8DTS7; A0A2R6QQP9; A0A2H5PRB4; M4EIN4; P29685; A0A0D3AI87; B9HWA2; F6GTT2; A0A078HSM2; A0A078GA38; S8C857; A0A0D3EGT1; A0A067LEH6; A0A067FNL4; A0A0B0MTN9;…	731341013 [431-446]; A0A175YRR8 [297-312]	0	1883.91	16
FALSE	High	Unambiguous	MIGTNAFQDTPIVEVTR	[R].MIGTNAFQDTPIVEVTR.[S]	1xOxidation [M1]	1xOxidation [M1]			0.0896182	0.000962316	0.191	1	1	1	A0A2G9HC54	A0A2G9HC54	A0A2G9HC54 [150-166]	0	1907.95	17
FALSE	High	Unambiguous	MGQIGVLTGTQGEIR	[K].MGQIGVLTGTQGEIR.[TR]	1xOxidation [M1]	1xOxidation [M1]			0.00127085	0	0.883	1	5	30	731313637	A0A0K9QLA8; A0A0K9RJU8; A0A1E5V0N4; 731313637; K3Y890	731313637 [307-321]	0	1575.82	15
FALSE	High	Unambiguous	MAVPQIEDIVR	[RK].MAVPQIEDIVR.[AG]	1xOxidation [M1]	1xOxidation [M1]			0.0518419	0	0.28	2	16	1	731334617; K4BJI5	W1PEW4; M0ZZ09; V7AZT1; A0A2R6PDJ0; 731334617; M0ZZ08; A0A2R6QG75; A0A1U8FY11; A0A0V0IB76; A0A0K9PCY0; F6I1P0; A0A1R3H055; A0A2G2X7N3; K4BJI5; A0A2G3CXR3; A0A2G3A0K9	731334617 [344-354]; K4BJI5 [340-350]	0	1286.68	11
FALSE	High	Rejected	MLAPHILGEEHYNTAR	[R].MLAPHILGEEHYNTAR.[G]	1xOxidation [M1]	1xOxidation [M1]			0.00142838	0	0.864	0	2	16		A0A2P2L6D7; A0A2P2L699		0	1867.91	16
FALSE	High	Unambiguous	MRQQQQQQQQQAQLLQQQQQQQQQQR	[R].MRQQQQQQQQQAQLLQQQQQQQQQQR.[E]	1xOxidation [M1]	1xOxidation [M1]			0.0842726	0.000962316	0.201	1	1	3	A0A2K3DVX7	A0A2K3DVX7	A0A2K3DVX7 [2887-2912]	1	3336.63	26
FALSE	High	Unambiguous	MSQLSVLTGSQGEIR	[K].MSQLSVLTGSQGEIR.[A]	1xOxidation [M1]	1xOxidation [M1]			0.00131054	0	0.878	2	2	3	731313633; 731313635	731313633; 731313635	731313633 [304-318]; 731313635 [307-321]	0	1621.82	15
FALSE	High	Unambiguous	MGLNDRDIVVLSGSHSLGR	[R].MGLNDRDIVVLSGSHSLGR.[A]	1xOxidation [M1]	1xOxidation [M1]			0.000674508	0	0.986	1	2	3	731337647	1108929373; 731337647	731337647 [146-164]	1	2042.04	19
FALSE	High	Unambiguous	MGQLGVLTGSQGEIR	[K].MGQLGVLTGSQGEIR.[A]	1xOxidation [M1]	1xOxidation [M1]			0.00249977	0	0.773	1	1	19	731313641	731313641	731313641 [308-322]	0	1561.8	15
FALSE	High	Unambiguous	MGQVEVLTGSAGQIR	[K].MGQVEVLTGSAGQIR.[K]	1xOxidation [M1]	1xOxidation [M1]			0.00715539	0	0.602	1	1	2	A0A0J8B6A2	A0A0J8B6A2	A0A0J8B6A2 [309-323]	0	1561.8	15
FALSE	High	Unambiguous	MTDAEELTVEER	[K].MTDAEELTVEER.[N]	1xOxidation [M1]	1xOxidation [M1]			0.00775097	0	0.589	1	2	2	731315739	731315739; A0A0K9RJW8	731315739 [36-47]	0	1438.64	12
FALSE	High	Rejected	MANIGVLTGTQGEIR	[K].MANIGVLTGTQGEIR.[T]	1xOxidation [M1]	1xOxidation [M1]			0.0395511	0	0.324	0	1	4		A0A1Q3D311		0	1575.82	15
FALSE	High	Rejected	MANIGVLTGQTGEIR	[K].MANIGVLTGQTGEIR.[K]	1xOxidation [M1]	1xOxidation [M1]			0.200582	0.00652397	0.06	0	1	1		A0A2G5E9T9		0	1575.82	15
FALSE	High	Unambiguous	MNISSSSFSIWPPTQR	[K].MNISSSSFSIWPPTQR.[T]	1xOxidation [M1]	1xOxidation [M1]			0.0117755	0	0.521	1	1	1	731314788	731314788	731314788 [37-52]	0	1853.89	16
FALSE	High	Unambiguous	MQAGATVTLR	[K].MQAGATVTLR.[N]	1xOxidation [M1]	1xOxidation [M1]			0.0547923	0.00054243	0.271	1	1	1	731342761	731342761	731342761 [78-87]	0	1063.56	10
FALSE	High	Unambiguous	MVALSGAHTIGQAR	[-].MVALSGAHTIGQAR.[C]	1xOxidation [M1]	1xOxidation [M1]			0.174124	0.00596827	0.083	1	1	1	W5ECF6	W5ECF6	W5ECF6 [1-14]	0	1427.74	14
FALSE	High	Unambiguous	MVASEDIGR	[R-].MVASEDIGR.[Q]	1xOxidation [M1]	1xOxidation [M1]			0.124153	0.00257247	0.138	1	43	1	731354052	A0A200QDP4; A0A1U8EY90; A0A2G2X3V8; A0A2H3Y9Q8; A0A1S4AI50; K4C003; A0A103YN96; A0A1U7UWM6; A0A0D9WIU6; A0A1U8F8N5; A0A2I0AU11; P29677; A0A251SYY4; A0A2K1YND4; A0A2J6JSH8; M0ZHB0; A0A0V0I061; K4DBV1; A0A2G2VFT6; A0A199VYR6; A0A2G3BNX8; A0A1U8E1T5; A0A2J6L0T0; A0A251TQA8; A0A1S3YE85; A0A0V0IHT9; A0A2G5F997; A0A2H3YJK1; A0A2G5F9A8; 731354054; A0A2I0X2K3; A0A2K1YNE3; A0A0K9QV60; Q41440; A0A1U8EY01; …	731354052 [437-445]	0	993.467	9
FALSE	High	Unambiguous	MGDIRPLTGSQGEIR	[K].MGDIRPLTGSQGEIR.[K]	1xOxidation [M1]	1xOxidation [M1]			0.0953028	0.00187066	0.181	1	1	2	A0A1S3CNG5	A0A1S3CNG5	A0A1S3CNG5 [305-319]	0	1645.83	15
FALSE	High	Rejected	MANIGVLTGQSGEIR	[K].MANIGVLTGQSGEIR.[K]	1xOxidation [M1]	1xOxidation [M1]			0.0452814	0	0.302	0	2	1		A0A2P4N783; A0A2N9FY10		0	1561.8	15
FALSE	High	Selected	MAAMIDQLQIR	[RK].MAAMIDQLQIR.[D]	1xOxidation [M1]	1xOxidation [M1; M4]			0.0402877	0	0.321	1	9	1	731334059	A0A2G2VXD4; K4AH70; 731334059; A0A1S3ZIV3; A0A2G3BK60; A0A1U8EGY2; B4FU14; A0A0K9QGR1; B6U5W6	731334059 [20-30]	0	1305.67	11
FALSE	High	Unambiguous	MSTGYNILTR	[R-].MSTGYNILTR.[DE]	1xOxidation [M1]	1xOxidation [M1]			0.034546	0	0.346	1	69	5	731361266	731361266; V7C6J2; A0A2P5RIT3; A0A1J6J974; A0A1S4BQK3; A0A1S3EBV0; A0A1U8FPN0; A0A2G2XB06; A0A1U8P381; K7MS03; A0A1S3T9S2; A0A0B0MCL4; A0A0D2P6E6; A0A0V0HHA6; A9PHU5; C1E420; S8D985; M1C263; A0A2G9I4H2; A0A2K1XRM3; A0A0B2R464; I1KXF0; A0A2P5Q759; A0A2C9DNP5; A0A2G3A416; A0A1S3UIY7; I3S798; I3SNG7; H2D5S7; I3SL66; A0A2G3D1R5; G7IUC0; I1KXF3; A0A1U8B8F4; W9QSD8; A0A151TBQ9; O82531; A9PD57; A0A1S3Y1…	731361266 [35-44]	0	1171.58	10
FALSE	High	Unambiguous	MLGGGGVDGAIHR	[R-K].MLGGGGVDGAIHR.[TA]	1xOxidation [M1]	1xOxidation [M1]			0.0146037	0	0.486	1	51	1	D8UFN4	A0A0E0GM31; B8AUA7; E1ZEJ1; A0A1D1ZZX5; B8AP03; A0A0Q3JWT9; A0A1D2AC09; K4AED8; A0A0A9L9A9; A0A199VSI8; A0A2J8A0B2; A0A0E0KDF7; A0A0A9DPJ4; A0A0D9Z700; B9FZ02; B8AUA9; A0A1B6QND3; A0A250XK20; A0A0P0VY29; I1QFI8; A0A2I0BHE5; A0A1U7ZVN4; A0A200R3I4; A0A0E0NUQ1; I1H5R1; A0A0E0D055; A0A2P6TU41; J3LNJ8; A0A2K3DK97; M0S977; A0A0P0XBR6; D8UFN4; 731320101; I1PB36; A0A0P0X0G3; A0A2I0WTD6; A0A0A9RLG6; A0A0…	D8UFN4 [1696-1708]	0	1255.62	13
FALSE	High	Unambiguous	MGNIAPLTGSRGEIR	[K].MGNIAPLTGSRGEIR.[ER]	1xOxidation [M1]	1xOxidation [M1]			0.0354064	0	0.342	1	4	1	731337449	A0A199UT12; 731337449; Q9M4Z4; A0A0K9RHJ5	731337449 [320-334]	1	1587.83	15
FALSE	High	Unambiguous	VGMMVQQTVNQR	[K].VGMMVQQTVNQR.[F]	1xOxidation [M]	1xOxidation [M3; M4]			0.0874404	0.000962316	0.195	1	1	3	731348057	731348057	731348057 [248-259]	0	1406.69	12
FALSE	High	Unambiguous	QVKAMQDPEIQNILSDPIMR	[R].QVKAMQDPEIQNILSDPIMR.[Q]	1xOxidation [M]	1xOxidation [M5; M19]			0.109111	0.00224036	0.159	1	1	2	A0A1U8ABL7	A0A1U8ABL7	A0A1U8ABL7 [518-537]	1	2342.18	20
FALSE	High	Unambiguous	SGAIMLMSDGMQNAGGDAR	[R].SGAIMLMSDGMQNAGGDAR.[D]	1xOxidation [M]	1xOxidation [M7; M11]			0.0172417	0	0.459	1	1	2	731329875	731329875	731329875 [170-188]	0	1897.82	19
FALSE	High	Unambiguous	TSPFVYTQCQAIHAR	[K].TSPFVYTQCQAIHAR.[S]	1xiodoTMT6plex [C9]	1xiodoTMT6plex [C9]			0.0745191	0.000962316	0.221	1	2	1	731362823	731362823; A0A0K9R3N2	731362823 [121-135]	0	2051.07	15	1.367	1.598	1.515	1.24	1.423	0.45	0.68	0.6	0.31	0.51	73.7	100.7	117.8	111.6	91.3	104.9	410.6	561.2	656.3	622	509	584.3	295.3	315.3	440.7	326.1	509	356.4	1
FALSE	High	Unambiguous	ADGLGVSSCIER	[R].ADGLGVSSCIER.[SC]	1xiodoTMT6plex [C9]	1xiodoTMT6plex [C9]			0.0466955	0	0.297	1	34	1	A0A2P5R6U5	Q41135; A0A067KSG7; A0A218VU33; A0A061GD13; D7MRY8; F4KHF4; A0A0K9QZ99; A0A2K1YH41; A0A1R3FVQ2; A0A2P5R6U5; A0A0D2Q6E2; B8LS12; 731373256; A0A1U8PRS3; A0A2P2LT33; A0A1U8ND02; A0A1R3H8A4; R0G9Q4; A0A176WKY2; M4QUT0; A0A2I0KHL7; A0A2K2ATX7; A0A061GDU8; P52410; A0A059CDF1; A0A0D6QW60; A0A059CCR5; Q000L3; A0A2C9UGA7; A0A2P5XM64; B9H3Z7; A0A2R6PY47; B9I105; A0A0B0PD43	A0A2P5R6U5 [433-444]	0	1535.8	12	0.697	0.971	1.008	0.834	0.997	-0.52	-0.04	0.01	-0.26	0	108.9	76	105.8	109.8	90.9	108.6	840.3	585.9	815.9	847.1	701	837.9	604.4	329.2	547.9	444.1	701	511.1	1
FALSE	High	Unambiguous	FVNSGTEACMGVIR	[R].FVNSGTEACMGVIR.[L]	1xiodoTMT6plex [C9]	1xiodoTMT6plex [C9]			0.0157223	0	0.474	1	102	4	A0A0K9RN52	B9SLG6; P42799; A0A1S3C0V8; A0A022Q7P9; A0A2P5FD46; A0A067FAU3; A0A103XWC9; A0A2P5QPI8; A0A1U8LDA9; A0A067FAN6; A0A1J3HHY8; A0A1P8BGJ8; V4NHK7; A0A2C9VRN2; A0A178UF15; 731334556; M1D5Y8; A0A1U8FYQ4; D7LS04; S8CLD8; A0A200R3Z0; A0A2P2K2X8; B9IFG3; A0A161YDY7; Q40147; Q9AVF5; A0A2G3CEM8; A0A0A0K488; A0A1U8HHQ1; A0A2P5SPD1; M0T543; M4F436; W9R5H4; A0A1S4D6G2; A0A2G9H458; A0A2P4KFN8; A0A1J3G333; A0A2…	A0A0K9RN52 [164-177]	0	1812.93	14	1.304	1.309	1.071	0.739	1.043	0.38	0.39	0.1	-0.44	0.06	92.8	121	121.5	99.4	68.6	96.8	1456.3	1899.4	1906.8	1559.6	1076	1519.5	1047.4	1067.2	1280.4	817.6	1076	926.8	2
FALSE	High	Unambiguous	VALEPGISCWR	[R].VALEPGISCWR.[C]	1xiodoTMT6plex [C9]	1xiodoTMT6plex [C9]			0.164748	0.0044837	0.092	2	128	2	731363489; A0A2P5C9W0	A0A1S8ACI0; A0A061G0Z5; A0A068U4P0; Q3C2L6; B7FI45; A0A2G3DF00; B8B9C4; A0A199UXZ2; A0A2I4FGA5; A0A0D2NLX5; A0A0D3H2T7; A0A078J5R3; Q93X81; A0A2K3L211; A0A200PWA1; M0SQC7; A0A0V0I7B6; A0A1D6D4L7; A0A067F1Z6; A0A2H5NMD8; 731363489; M1D596; V4LTW0; A0A2P5D9F5; A0A287WLF1; A0A1D6C0R9; A0A164YS71; D7TMY3; A0A0D2RX67; A0A1B1ZAC7; A0A2G5EMK8; A0A2P5WC14; A0A058ZZ74; A0A2H5NM57; A0A0C9RJR6; A0A067EYF3; …	731363489 [99-109]; A0A2P5C9W0 [101-111]	0	1559.86	11	0.65	0.708	0.686	0.728	0.609	-0.62	-0.5	-0.54	-0.46	-0.71	136.9	89	97	93.9	99.6	83.4	702.3	456.5	497.6	481.6	511	427.9	505.1	256.5	334.1	252.5	511	261	1
FALSE	High	Unambiguous	NQGGFDMICSGR	[R].NQGGFDMICSGR.[D]	1xiodoTMT6plex [C9]	1xiodoTMT6plex [C9]			0.0217809	0	0.421	1	198	4	731350936	A0A2P2JS00; A9P9M1; A0A2G2WD23; A0A287W624; A0A1J3GI63; A0A1J3E960; A0A2G9GM62; A0A103Y3V4; A0A2G2XFR3; A0A199UDM7; A0A067JMI1; A0A287W699; U5QUH1; A0A0D3D5Y7; A0A0D2VGQ4; R0GTR0; A0A1D6D1Q3; A9YVC9; A0A059CBA3; C0P567; A0A2P5YBQ1; V7BRN7; A0A2P5SBM9; A0A1S3YUZ1; A0A1J3F494; V4UL30; A0A0V0IHP3; A0A058ZYU3; A0A078GX24; R0IRV4; Q0MRD3; V4L759; A0A1J3FD85; A0A1J3ILE8; A0A2G5D3L7; W5HEW7; M0SCS1; C5Z…	731350936 [157-168]	0	1613.77	12	0.785	1.14	1.048	1.168	0.86	-0.35	0.19	0.07	0.22	-0.22	100	78.4	114	104.8	116.8	86	745.7	585	850.3	781.7	871.3	641.4	536.3	328.7	571	409.8	871.3	391.2	2
FALSE	High	Unambiguous	QLTDNVYVCR	[-].QLTDNVYVCR.[S]	1xiodoTMT6plex [C9]	1xiodoTMT6plex [C9]			0.0623462	0.00054243	0.25	1	2	1	A0A287HDI6	A0A287HDI6; A0A287HDM0	A0A287HDI6 [1-10]	0	1539.82	10	1.609	1.135	1.275	0.975	1.642	0.69	0.18	0.35	-0.04	0.72	78.6	126.5	89.2	100.2	76.6	129	664.2	1068.9	753.8	846.9	647.3	1090.4	477.7	600.6	506.2	444	647.3	665.1	1
FALSE	High	Unambiguous	FGDEIYTICESTGR	[R].FGDEIYTICESTGR.[L]	1xiodoTMT6plex [C9]	1xiodoTMT6plex [C9]			0.00751625	0	0.594	1	1	1	A0A0J8B5I8	A0A0J8B5I8	A0A0J8B5I8 [13-26]	0	1919.94	14	0.663	0.97	1.056	0.901	0.889	-0.59	-0.04	0.08	-0.15	-0.17	109.5	72.6	106.2	115.7	98.7	97.3	658.5	436.6	638.7	695.7	593.5	585.1	473.6	245.3	428.9	364.7	593.5	356.9	1
FALSE	High	Unambiguous	SNSSVAAVCTNEMNR	[K].SNSSVAAVCTNEMNR.[A]	1xiodoTMT6plex [C9]	1xiodoTMT6plex [C9]			0.00456724	0	0.675	1	1	2	731333738	731333738	731333738 [141-155]	0	1911.92	15	0.513	0.588	0.557	0.635	0.403	-0.96	-0.77	-0.84	-0.65	-1.31	162.3	83.3	95.5	90.4	103.1	65.5	2106	1080.9	1238.9	1172.6	1337.8	849.6	1514.7	607.3	831.9	614.7	1337.8	518.2	2
FALSE	High	Unambiguous	SDEAVQGFCLASR	[K].SDEAVQGFCLASR.[G]	1xiodoTMT6plex [C9]	1xiodoTMT6plex [C9]			0.0612064	0.00054243	0.253	1	1	1	731322585	731322585	731322585 [16-28]	0	1711.86	13	0.596	0.928	0.943	0.695	0.805	-0.75	-0.11	-0.09	-0.52	-0.31	120.8	72	112.1	113.9	84	97.2	420.7	250.6	390.5	396.6	292.6	338.6	302.6	140.8	262.2	207.9	292.6	206.5	1
FALSE	High	Unambiguous	VEVTGPEQCPEEGRLPDAGPPSPAQHLR	[R].VEVTGPEQCPEEGRLPDAGPPSPAQHLR.[D]	1xiodoTMT6plex [C9]	1xiodoTMT6plex [C9]			0.00129452	0	0.88	1	2	1	731312443	731312443; 731312445	731312443 [192-219]	1	3295.67	28	0.576	0.639	0.652	0.661	0.727	-0.8	-0.65	-0.62	-0.6	-0.46	141	81.2	90.1	91.9	93.2	102.6	615.9	354.5	393.3	401.5	407	447.9	443	199.2	264.1	210.5	407	273.2	1
FALSE	High	Unambiguous	YGINMSLQCVR	[K].YGINMSLQCVR.[N]	1xiodoTMT6plex [C9]	1xiodoTMT6plex [C9]			0.0227391	0	0.414	1	1	1	731350097	731350097	731350097 [95-105]	0	1612.85	11	0.741	0.851	1.059	0.715	0.87	-0.43	-0.23	0.08	-0.48	-0.2	114.6	84.9	97.5	121.3	82	99.7	482.2	357.4	410.3	510.5	344.9	419.4	346.8	200.8	275.5	267.6	344.9	255.8	1
FALSE	High	Unambiguous	VGEGPAAQCISGFTALDVPPPR	[K].VGEGPAAQCISGFTALDVPPPR.[G]	1xiodoTMT6plex [C9]	1xiodoTMT6plex [C9]			0.00131054	0	0.878	1	1	1	731351009	731351009	731351009 [464-485]	0	2511.32	22	0.559	0.88	0.75	1.173	0.868	-0.84	-0.18	-0.42	0.23	-0.2	114.7	64.1	101	86	134.6	99.6	302.3	168.9	266	226.6	354.5	262.3	217.4	94.9	178.6	118.8	354.5	160	1
FALSE	High	Unambiguous	ILNYANELCER	[R].ILNYANELCER.[L]	1xiodoTMT6plex [C9]	1xiodoTMT6plex [C9]			0.00656508	0	0.616	1	4	8	731376286	A0A2C9UDV2; 731376286; Q94KV2; A0A2C9UDI6	731376286 [410-420]	0	1666.88	11	1.041	1.14	1.017	1.393	1.024	0.06	0.19	0.02	0.48	0.03	90.7	94.4	103.4	92.2	126.4	92.9	3636.8	3784.2	4144.4	3697.3	5065.8	3723.1	2615.7	2126.2	2782.9	1938.3	5065.8	2270.9	8
FALSE	High	Unambiguous	TIAPFNVCVDPSTFPASR	[K].TIAPFNVCVDPSTFPASR.[G]	1xiodoTMT6plex [C8]	1xiodoTMT6plex [C8]			0.0374214	0	0.333	1	1	1	731375712	731375712	731375712 [322-339]	0	2251.17	18	3.143	1.051	5.03	0.414	4.388	1.65	0.07	2.33	-1.27	2.13	39.9	125.5	42	200.9	16.5	175.2	108.7	341.7	114.2	546.9	45	477.1	78.2	192	76.7	286.7	45	291	1
FALSE	High	Unambiguous	IGAINVVCSSADAATR	[R].IGAINVVCSSADAATR.[VS]	1xiodoTMT6plex [C8]	1xiodoTMT6plex [C8]			0.00155681	0	0.85	1	20	2	731316797	V4LTS4; A0A1J3ICV7; M4E5B5; M4D4B0; A0A078FKE4; A0A166HSV2; A0A0D3A2Q4; R0F5A4; Q56WQ1; B9DG21; V4MMH1; A0A1J3E9H9; 731316797; D7MAT0; P46248; A0A0D3DGZ9; F4JTH0; U6JMB1; A0A0D3DHA7; A0A1J3FER2	731316797 [313-328]	0	1877.01	16	0.872	0.953	1.184	0.896	1.12	-0.2	-0.07	0.24	-0.16	0.16	99.6	86.8	95	117.9	89.2	111.5	974.5	849.3	929.1	1153.7	873.1	1091.4	700.9	477.2	623.9	604.8	873.1	665.7	2
FALSE	High	Unambiguous	FGSLLASCSYDGR	[K].FGSLLASCSYDGR.[VIA]	1xiodoTMT6plex [C8]	1xiodoTMT6plex [C8]			0.0354064	0	0.342	1	53	2	M5X563	A0A061GCL8; I3S8Z5; A0A0R0J154; 731353131; A9P8P9; K7MQS2; A0A072UXW2; I1KYB6; A0A1U8AIZ1; A0A067LI06; A0A2P2JJI4; A0A2C9VP28; T2DNC6; A0A0K9RWT0; A0A059D1A1; B9IEJ8; A0A2I4G5J8; A0A1R3H8E6; M5X563; A0A2P6RX87; A0A1S3V1E5; A0A0B2PT40; A0A0A0KCU3; A0A1S3UI19; V7BFI5; A0A0S3SUI7; C6TE87; A0A151U2B9; A0A1R3KXA2; A0A2K1ZH16; A0A1D1YSP1; D7UPN0; A0A2I4GVC8; A0A2K3L6J4; B9RQG1; A0A2R6RUN4; A0A2K1YRQ5; …	M5X563 [175-187]	0	1704.86	13	1.022	0.93	0.533	0.721	0.661	0.03	-0.1	-0.91	-0.47	-0.6	123.3	126	114.7	65.7	88.8	81.5	516	527.2	480	275.1	371.8	341.2	371.1	296.2	322.3	144.2	371.8	208.1	1
FALSE	High	Unambiguous	MTPTTLACIGAAAETALPPTHPLR	[-].MTPTTLACIGAAAETALPPTHPLR.[R]	1xiodoTMT6plex [C8]	1xiodoTMT6plex [C8]			0.0608311	0.00054243	0.254	1	1	1	M8AU58	M8AU58	M8AU58 [1-24]	0	2762.49	24	1.42	1.192	1.592	0.736	1.478	0.51	0.25	0.67	-0.44	0.56	80.9	114.8	96.4	128.8	59.5	119.6	105.8	150.2	126.1	168.4	77.9	156.4	76.1	84.4	84.7	88.3	77.9	95.4	1
FALSE	High	Unambiguous	QTPDPILCEASLR	[K].QTPDPILCEASLR.[S]	1xiodoTMT6plex [C8]	1xiodoTMT6plex [C8]			0.0315017	0	0.361	1	1	1	731348205	731348205	731348205 [44-56]	0	1771.96	13	0.653	0.493	0.991	0.922	0.835	-0.61	-1.02	-0.01	-0.12	-0.26	122.6	80.1	60.4	121.5	113.1	102.3	277.4	181.2	136.7	274.9	255.8	231.5	199.5	101.8	91.8	144.1	255.8	141.2	1
FALSE	High	Unambiguous	QSGALHVCFEGAEDLPGGGGSKYGTSVTR	[K].QSGALHVCFEGAEDLPGGGGSKYGTSVTR.[E]	1xiodoTMT6plex [C8]	1xiodoTMT6plex [C8]			0.222688	0.00972005	0.043	1	1	1	A0A151QMI1	A0A151QMI1	A0A151QMI1 [112-140]	1	3209.58	29	1.037	1.034	1.468	0.597	1.285	0.05	0.05	0.55	-0.74	0.36	93.4	96.9	96.6	137.2	55.8	120.1	27.8	28.8	28.7	40.8	16.6	35.7	20	16.2	19.3	21.4	16.6	21.8	1
FALSE	High	Unambiguous	VGYYTQYCQQLGVSPGNNLR	[R].VGYYTQYCQQLGVSPGNNLR.[C]	1xiodoTMT6plex [C8]	1xiodoTMT6plex [C8]			0.000469246	0	1.045	1	2	1	731352263	Q9XFW7; 731352263	731352263 [245-264]	0	2589.31	20	0.692	0.602	0.625	1.04	1.075	-0.53	-0.73	-0.68	0.06	0.1	119.2	82.5	71.8	74.5	124	128.1	402.9	278.7	242.6	251.8	419.1	433	289.8	156.6	162.9	132	419.1	264.1	1
FALSE	High	Unambiguous	IAEEAGACAVMALER	[R].IAEEAGACAVMALER.[V]	1xiodoTMT6plex [C8]	1xiodoTMT6plex [C8]			0.00979157	0	0.551	1	145	2	A0A251NKT4	A0A1E5V997; A0A2P4I6J6; A0A1J3ECI1; A0A200PLL3; K3Z2D3; A0A2P5Y9Y8; A0A0D9WBP2; A0A0E0B704; A0A2P4IY20; I6YMA7; B4FQA2; A0A1J7HN27; R0FXV1; A0A1D6HR41; Q3S861; A0A2P5SS14; Q45FF1; F6GUR4; M1CZB0; A2YH94; A0A1R3IR38; A0A2P5CPK0; A0A067JNQ7; A0A1R3JS81; A0A0D6QZ88; A0A1U8HBA8; M4DKV2; A0A2K3JN70; A0A2I0X530; A0A1U7YLK6; A3BFP4; A0A0D2VY65; A0A0E0EBZ7; K4CA57; A0A2C9V9S7; A0A2P5STN1; A0A2P5Q5R3; A0A…	A0A251NKT4 [52-66]	0	1862.97	15	0.53	0.659	0.849	0.768	0.557	-0.92	-0.6	-0.24	-0.38	-0.84	137.5	72.9	90.6	116.7	105.6	76.6	647.5	343.1	426.7	549.6	497.2	360.5	465.7	192.8	286.5	288.1	497.2	219.9	1
FALSE	High	Unambiguous	QLLEAAGCST	[K].QLLEAAGCST.[-]	1xiodoTMT6plex [C8]	1xiodoTMT6plex [C8]			0.184034	0.00627731	0.074	1	1	1	731332985	731332985	731332985 [80-89]	0	1321.7	10	0.927	0.978	1.055	0.725	0.862	-0.11	-0.03	0.08	-0.46	-0.21	108.2	100.3	105.8	114.1	78.4	93.3	1057.8	981	1034.6	1116.1	766.6	912	760.8	551.2	694.7	585.1	766.6	556.3	1
FALSE	High	Unambiguous	IGETVPGCDER	[KR].IGETVPGCDER.[V]	1xiodoTMT6plex [C8]	1xiodoTMT6plex [C8]			0.0731568	0.000962316	0.224	1	18	1	731363127	A0A2I4E3K5; G7L217; A0A1Q3C0I2; G7KKX1; A0A072U7C6; A0A1S2XK21; A0A2I4EKQ6; A0A2I4E3K3; A0A2I4EKP9; A0A1S3DXB3; G7KKX0; A0A2I4EKP8; A0A2H3ZI88; V7BZ92; A0A2H3ZI84; A0A2I4EKQ1; A0A0A7LU74; 731363127	731363127 [75-85]	0	1504.76	11	0.817	1.06	0.926	0.933	0.846	-0.29	0.08	-0.11	-0.1	-0.24	107.5	87.8	113.9	99.5	100.3	90.9	452.2	369.3	479.2	418.7	421.9	382.5	325.2	207.5	321.8	219.5	421.9	233.3	1
FALSE	High	Unambiguous	NSFYASTCPGVEGIVR	[R].NSFYASTCPGVEGIVR.[S]	1xiodoTMT6plex [C8]	1xiodoTMT6plex [C8]			0.0111415	0	0.53	1	1	1	731353308	731353308	731353308 [24-39]	0	2029.04	16	0.85	1.01	0.907	0.993	1.459	-0.23	0.01	-0.14	-0.01	0.55	96.5	82	97.4	87.5	95.8	140.8	571	485.3	576.5	518.1	566.9	833.2	410.7	272.7	387.1	271.6	566.9	508.2	1
FALSE	High	Unambiguous	SGDLVSYCAEEGVR	[R].SGDLVSYCAEEGVR.[VIL]	1xiodoTMT6plex [C8]	1xiodoTMT6plex [C8]			0.138686	0.00292848	0.12	1	69	1	A0A1Q3CSB7	A0A2P5QIQ3; A0A2H5PXF1; A0A251NJ09; A0A2G5DQI3; A0A1R3GUL4; A0A1S3C3K4; A0A1V1G375; A0A2K3MVH5; A0A1U8PGU1; A0A2C9UBA1; A0A164ZMM6; A0A2P5FN68; A0A2K1WUH9; Q9SNX8; A0A061GJ64; A0A061GJL6; A0A067KMK5; A0A2G9HEA1; A5BIP4; W9R5Q7; A0A2G5EB47; A0A2I4G6R8; A0A151RDE3; A0A1S2YP36; I1MWZ7; A0A2P5DMS6; B9RNW8; A0A0K0K9Q6; A0A0C9S3Y4; V4UH48; A0A2P5XI75; A0A0D6RAZ5; A0A1Q3CSB7; A0A2I4H2E1; A0A1U8JGJ0; P81…	A0A1Q3CSB7 [188-201]	0	1813.9	14	0.45	0.516	1.092	1	0.585	-1.15	-0.95	0.13	0	-0.77	129.2	58.2	66.7	141.1	129.2	75.5	498.3	224.4	257.2	544.4	498.5	291.3	358.4	126.1	172.7	285.4	498.5	177.7	1
FALSE	High	Unambiguous	STSTSISCLAIAAAPENVNSALNVIANMQQQNHR	[R].STSTSISCLAIAAAPENVNSALNVIANMQQQNHR.[V]	1xiodoTMT6plex [C8]	1xiodoTMT6plex [C8]			0.000180885	0	1.2	1	1	1	731319852	731319852	731319852 [383-416]	0	3882.98	34	1.251	1.004	1.614	1.389	1.333	0.32	0.01	0.69	0.47	0.41	79	98.9	79.4	127.5	109.8	105.4	24.5	30.6	24.6	39.5	34	32.6	17.6	17.2	16.5	20.7	34	19.9	1
FALSE	High	Unambiguous	LGSVSDYCVR	[RK].LGSVSDYCVR.[H]	1xiodoTMT6plex [C8]	1xiodoTMT6plex [C8]			0.0508942	0	0.283	1	59	4	A0A0J8BEJ7	A0A1U7WGT9; A0A0V0HSF1; A0A2G9HGA3; A0A0V0HMM4; A0A2G2WW51; A0A2R6PUB9; A0A251T8Y0; A0A290YXS6; M1BP29; A0A1S4BIX5; A0A0K9P512; A0A165ZEI2; M1CCB4; A0A251RSN3; G7IRL4; A0A1U8EDL5; A0A2G3CK94; A0A2G2Y4J8; M1A221; S8ED92; A0A1U8H6U5; A0A1S4DAF5; A9NNA0; A0A0K9RQ02; A0A1S4BYU5; A0A103Y7X1; A0A068CDE2; A0A1U7W5G4; A0A161ZR62; K4CXK7; A0A1S4BYU3; A0A2G2XZH7; A0A1S2XF60; A0A2J6MI88; A0A068UC39; A0A1S4A…	A0A0J8BEJ7 [206-215]	0	1427.75	10	0.673	0.882	0.621	0.722	0.476	-0.57	-0.18	-0.69	-0.47	-1.07	137.2	92.3	121.1	85.1	99	65.3	2674.8	1799.7	2360.3	1659.7	1930.5	1272.9	1923.8	1011.2	1584.9	870.1	1930.5	776.4	4
FALSE	High	Unambiguous	EFEQARNCLLPMGITSENVAHR	[K].EFEQARNCLLPMGITSENVAHR.[F]	1xiodoTMT6plex [C8]	1xiodoTMT6plex [C8]			0.00765621	0	0.591	1	1	1	Q42918	Q42918	Q42918 [185-206]	1	2844.44	22	0.752	0.787	1.085	0.492	1.159	-0.41	-0.35	0.12	-1.02	0.21	113.7	85.6	89.5	123.4	55.9	131.9	24.6	18.5	19.4	26.7	12.1	28.5	17.7	10.4	13	14	12.1	17.4	1
FALSE	High	Unambiguous	SIQESASCIVR	[K].SIQESASCIVR.[V]	1xiodoTMT6plex [C8]	1xiodoTMT6plex [C8]			0.0307362	0	0.365	1	1	1	A0A0J8CIE0	A0A0J8CIE0	A0A0J8CIE0 [273-283]	0	1521.83	11	0.359	0.519	0.613	0.501	0.855	-1.48	-0.95	-0.71	-1	-0.23	156	55.9	81	95.6	78.1	133.4	1045	374.8	542.5	640.2	523.1	894	751.6	210.6	364.3	335.6	523.1	545.3	1
FALSE	High	Unambiguous	SDDFSSLCGPVLDDVR	[R].SDDFSSLCGPVLDDVR.[L]	1xiodoTMT6plex [C8]	1xiodoTMT6plex [C8]			0.0155301	0	0.476	1	4	4	731320229	731320229; A0A218XP04; A0A0K9QAK5; A0A2I0HNZ9	731320229 [345-360]	0	2054.01	16	0.469	0.801	1.051	2.995	0.792	-1.09	-0.32	0.07	1.58	-0.34	84.4	39.6	67.6	88.7	252.9	66.8	413.1	193.6	330.8	434	1237.3	327.1	297.1	108.8	222.1	227.5	1237.3	199.5	2
FALSE	High	Unambiguous	LENSGNCSYDVDYETR	[R].LENSGNCSYDVDYETR.[A]	1xiodoTMT6plex [C7]	1xiodoTMT6plex [C7]			0.00844791	0	0.575	1	1	1	731332586	731332586	731332586 [170-185]	0	2193.99	16	0.401	0.782	0.51	1.763	0.481	-1.32	-0.35	-0.97	0.82	-1.06	121.5	48.7	95	62	214.3	58.5	511.7	205	400.2	260.9	902.2	246.1	368	115.2	268.7	136.8	902.2	150.1	1
FALSE	High	Unambiguous	SLGLIVCR	[R].SLGLIVCR.[G]	1xiodoTMT6plex [C7]	1xiodoTMT6plex [C7]			0.18067	0.00627731	0.077	1	13	2	A0A1D1Z0S0	731332670; A0A1U8E6T1; 731344499; A0A1S2Z6Y4; A8IFM6; A0A1D1Z0S0; K4CQZ3; G7L5K6; A0A2R6QKU7; A0A2P5FFD8; A0A2G3BIF2; I3SC15; A0A2G2YPD2	A0A1D1Z0S0 [95-102]	0	1189.73	8	0.978	0.925	1.246	0.721	1.174	-0.03	-0.11	0.32	-0.47	0.23	99.3	97.1	91.8	123.7	71.6	116.6	647.4	632.9	598.5	806.5	466.5	760.1	465.6	355.6	401.9	422.8	466.5	463.6	1
FALSE	High	Unambiguous	AINGGECGGGNTPAVNAR	[R].AINGGECGGGNTPAVNAR.[V]	1xiodoTMT6plex [C7]	1xiodoTMT6plex [C7]			0.00391634	0	0.7	1	2	2	731352251	731352251; 731352261	731352251 [226-243]	0	1987	18	0.388	0.662	0.604	1.208	0.808	-1.37	-0.59	-0.73	0.27	-0.31	128.5	49.8	85.1	77.6	155.2	103.8	862	334.2	571	520.4	1041.6	696.8	620	187.8	383.4	272.8	1041.6	425	2
FALSE	High	Unambiguous	MNEAQVCVSTTNR	[R].MNEAQVCVSTTNR.[N]	1xiodoTMT6plex [C7]	1xiodoTMT6plex [C7]			0.0612064	0.00054243	0.253	1	19	1	A0A022RUV0	A0A0D2NN49; A0A0B0NMZ6; A0A0D2RYL4; A0A1U8I236; A0A022RUV0; M1B1N3; A0A1U8GPD4; A0A1D2AEH5; A0A1U8HXI0; A0A1U8I250; A0A1U7Z286; A0A0A0LEJ4; A0A1U8HRM6; A0A061EN00; A0A0D2Q523; 731374883; K4BDZ7; A0A0V0IEW2; A0A087SJV4	A0A022RUV0 [504-516]	0	1781.88	13	0.437	0.622	0.661	0.62	0.563	-1.19	-0.69	-0.6	-0.69	-0.83	153.7	67.2	95.6	101.6	95.3	86.6	1454.9	635.7	904.4	961.6	901.6	819.6	1046.4	357.2	607.3	504.1	901.6	499.9	1
FALSE	High	Unambiguous	FFASYNCDR	[R].FFASYNCDR.[TAI]	1xiodoTMT6plex [C7]	1xiodoTMT6plex [C7]			0.0768462	0.000962316	0.216	1	43	2	A0A0K9QSQ2	A0A1D6A2E8; Q15MQ3; A0A0E0RKJ4; Q5IUP5; N1QTG9; A0A1D5YV03; Q5IUU8; A0A1D6MV21; Q5IUU4; M7ZN32; Q5URV9; C3TX93; C5YT19; A0A0E0JCV4; A3CJV0; A0A096UTI5; Q5IUU9; H2KWT0; A0A1D5YV02; Q2QLJ8; Q5IUV7; Q5IUP0; Q5IUR3; J3NFD6; A0A0E0DNS3; K3Z4A7; I1R897; I1IG10; C3TX91; Q5IUR5; B4G154; Q5IUW4; A0A0D9Y1W2; A0A0E0BVR7; 731344233; W5FMK7; Q5IUQ9; A0A1D5YV01; A0A0E0JCV5; A0A1D5ZGC1; A0A1E5W7B7; A0A0K9QSQ2; …	A0A0K9QSQ2 [299-307]	0	1451.69	9	0.763	0.75	0.839	0.774	0.896	-0.39	-0.42	-0.25	-0.37	-0.16	119.5	91.2	89.6	100.3	92.4	107.1	1311.3	1000.6	983	1100.4	1014.4	1175	943.1	562.2	660.1	576.9	1014.4	716.7	2
FALSE	High	Unambiguous	TELIFFCSPNNPTGAAATR	[K].TELIFFCSPNNPTGAAATR.[E]	1xiodoTMT6plex [C7]	1xiodoTMT6plex [C7]			0.00339976	0	0.723	1	2	2	731317741	A0A0K9QWE6; 731317741	731317741 [238-256]	0	2339.2	19	0.759	0.865	0.764	0.832	0.624	-0.4	-0.21	-0.39	-0.26	-0.68	123.8	94	107.1	94.6	103.1	77.3	673.4	511.2	582.6	514.6	560.4	420.4	484.3	287.2	391.2	269.8	560.4	256.4	1
FALSE	High	Unambiguous	LYVTYYCPFAQR	[R].LYVTYYCPFAQR.[A]	1xiodoTMT6plex [C7]	1xiodoTMT6plex [C7]			0.0157223	0	0.474	1	1	1	731349336	731349336	731349336 [30-41]	0	1852.96	12	1.023	0.981	1.017	0.831	1.119	0.03	-0.03	0.02	-0.27	0.16	100.5	102.8	98.6	102.2	83.5	112.5	570.9	583.9	560.2	580.8	474.5	639.1	410.6	328.1	376.2	304.5	474.5	389.8	1
FALSE	High	Unambiguous	GSVSDYCVR	[R].GSVSDYCVR.[N]	1xiodoTMT6plex [C7]	1xiodoTMT6plex [C7]			0.199352	0.00652397	0.061	1	4	1	D5A9F7	D5A9S7; D5A9F7; A9NL40; D5ABU2	D5A9F7 [156-164]	0	1314.67	9	0.55	0.642	0.548	0.601	0.436	-0.86	-0.64	-0.87	-0.73	-1.2	158.9	87.3	102	87	95.5	69.3	3213	1765.9	2063.2	1759.7	1930.6	1402.2	2310.9	992.2	1385.4	922.5	1930.6	855.3	1
FALSE	High	Unambiguous	LYTAFTCPYAQR	[R].LYTAFTCPYAQR.[A]	1xiodoTMT6plex [C7]	1xiodoTMT6plex [C7]			0.01926	0	0.441	1	1	2	731360550	731360550	731360550 [30-41]	0	1762.91	12	2.377	0.921	2.223	0.957	1.591	1.25	-0.12	1.15	-0.06	0.67	66.2	157.2	60.9	147.1	63.3	105.3	678.1	1611.6	624.6	1507.7	648.8	1078.8	487.7	905.5	419.4	790.4	648.8	658	2
FALSE	High	Unambiguous	VAIYPECPNPELVR	[K].VAIYPECPNPELVR.[G]	1xiodoTMT6plex [C7]	1xiodoTMT6plex [C7]			0.00359324	0	0.714	1	1	2	A0A0J8B2W2	A0A0J8B2W2	A0A0J8B2W2 [158-171]	0	1929.05	14	0.366	0.444	0.558	0.786	0.379	-1.45	-1.17	-0.84	-0.35	-1.4	169.8	62.1	75.4	94.7	133.5	64.4	1734.8	634.7	770.5	967.9	1364	658.1	1247.7	356.6	517.4	507.4	1364	401.4	2
FALSE	High	Unambiguous	YTGESPCLLTIR	[R].YTGESPCLLTIR.[A]	1xiodoTMT6plex [C7]	1xiodoTMT6plex [C7]			0.0941377	0.00187066	0.183	1	1	1	731364888	731364888	731364888 [172-183]	0	1681.91	12	0.651	0.877	0.935	0.675	1.05	-0.62	-0.19	-0.1	-0.57	0.07	115.6	75.3	101.5	108.2	78	121.4	470.6	306.5	413	440.3	317.5	494.1	338.5	172.2	277.3	230.8	317.5	301.4	1
FALSE	High	Unambiguous	NVGLEYCMSGLTGNTIDSHR	[K].NVGLEYCMSGLTGNTIDSHR.[L]	1xiodoTMT6plex [C7]	1xiodoTMT6plex [C7]			0.0202314	0	0.433	1	1	2	A0A1S3TTL2	A0A1S3TTL2	A0A1S3TTL2 [89-108]	0	2496.22	20	1.264	1.198	1.396	0.638	1.503	0.34	0.26	0.48	-0.65	0.59	85.7	108.4	102.7	119.7	54.7	128.8	157	198.4	188.1	219.2	100.1	235.9	112.9	111.5	126.3	114.9	100.1	143.9	2
FALSE	High	Unambiguous	QDDQLFCESWR	[R].QDDQLFCESWR.[F]	1xiodoTMT6plex [C7]	1xiodoTMT6plex [C7]			0.0472734	0	0.295	1	1	1	731354034	731354034	731354034 [39-49]	0	1755.83	11	0.803	0.965	1.224	0.957	1.522	-0.32	-0.05	0.29	-0.06	0.61	92.7	74.5	89.5	113.5	88.7	141.1	363.7	292.2	351	445.2	348.2	553.7	261.6	164.2	235.7	233.4	348.2	337.7	1
FALSE	High	Unambiguous	WAALGECTR	[R].WAALGECTR.[N]	1xiodoTMT6plex [C7]	1xiodoTMT6plex [C7]			0.0792459	0.000962316	0.211	1	2	1	731364088	A0A2H3Y8N0; 731364088	731364088 [269-277]	0	1335.7	9	0.875	0.948	0.95	0.82	0.953	-0.19	-0.08	-0.07	-0.29	-0.07	108.2	94.7	102.6	102.7	88.7	103.1	648.5	567.6	615.1	615.9	531.7	618.1	466.4	318.9	413	322.9	531.7	377	1
FALSE	High	Unambiguous	GPEGYACRDPATLTTDDFVYTGFR	[R].GPEGYACRDPATLTTDDFVYTGFR.[G]	1xiodoTMT6plex [C7]	1xiodoTMT6plex [C7]			0.0020033	0	0.809	2	10	1	731345483; 731320497	731345483; 731320499; Q9FPQ1; 731345487; 731320513; 731345501; 731320497; 731345503; 731320507; Q84V63	731345483 [34-57]; 731320497 [34-57]	1	2981.43	24	0.893	0.759	0.926	0.542	2.572	-0.16	-0.4	-0.11	-0.88	1.36	89.7	80.1	68	83	48.6	230.6	394	351.9	298.9	364.7	213.5	1013.4	283.4	197.7	200.7	191.2	213.5	618.1	1
FALSE	High	Unambiguous	SLVAQNCDVPAEQQR	[K].SLVAQNCDVPAEQQR.[L]	1xiodoTMT6plex [C7]	1xiodoTMT6plex [C7]			0.00909496	0	0.563	1	1	3	731357482	731357482	731357482 [46-60]	0	1987.02	15	0.6	0.842	0.903	1.15	0.867	-0.74	-0.25	-0.15	0.2	-0.21	111.9	67.1	94.2	101.1	128.7	97	1752.4	1051.5	1475.2	1582.9	2015.9	1520	1260.4	590.8	990.6	829.8	2015.9	927.1	3
FALSE	High	Unambiguous	VVSAACEGEELTVEER	[K].VVSAACEGEELTVEER.[N]	1xiodoTMT6plex [C6]	1xiodoTMT6plex [C6]			0.0134816	0	0.499	2	2	3	731339703; 731339701	731339703; 731339701	731339703 [33-48]; 731339701 [33-48]	0	2050.03	16	0.612	0.891	1.001	0.977	0.819	-0.71	-0.17	0	-0.03	-0.29	113.2	69.3	100.9	113.3	110.6	92.7	1232.2	754.4	1098.2	1233.6	1204.4	1008.8	886.2	423.9	737.4	646.7	1204.4	615.3	3
FALSE	High	Unambiguous	MGVITCTLADFTSPVAPAR	[-].MGVITCTLADFTSPVAPAR.[L]	1xiodoTMT6plex [C6]	1xiodoTMT6plex [C6]			0.0223234	0	0.417	1	1	11	A0A0J8ES22	A0A0J8ES22	A0A0J8ES22 [1-19]	0	2279.21	19	0.946	1.339	1.213	0.628	1.143	-0.08	0.42	0.28	-0.67	0.19	95.7	90.5	128.2	116.1	60.1	109.4	1611	1523.7	2157.1	1953.9	1012.3	1841.6	1158.7	856.1	1448.5	1024.3	1012.3	1123.3	11
FALSE	High	Unambiguous	STFSYCLPSFR	[KR].STFSYCLPSFR.[ST]	1xiodoTMT6plex [C6]	1xiodoTMT6plex [C6]			0.114613	0.00257247	0.151	1	24	3	731319852	D7LZW7; A0A0K9QTC7; A9P9A2; A0A0B0N5X7; A0A2C9W531; Q9FL43; A0A0D3EH13; B9GWZ3; F4K5B9; A0A2P5YIF4; U5GV71; A0A2P5SRF2; A0A1U8LHI8; A0A0D2V0N9; R0H6Y1; A0A0K9R7P7; A0A2K2BRH7; M4CYK1; A0A2I0KJN3; 731319852; A0A218WZY4; A0A1U8IPS7; A9PBM7; A0A1D1Z0V6	731319852 [237-247]	0	1636.84	11	1.079	1.131	1.602	2.558	1.258	0.11	0.18	0.68	1.35	0.33	69.5	75	78.7	111.4	177.9	87.5	629.8	679.7	712.6	1008.9	1611	792.2	453	381.9	478.5	528.9	1611	483.2	3
FALSE	High	Unambiguous	NPELPCPYYITR	[K].NPELPCPYYITR.[D]	1xiodoTMT6plex [C6]	1xiodoTMT6plex [C6]			0.0464092	0	0.298	1	1	2	731364471	731364471	731364471 [62-73]	0	1794.94	12	0.489	0.503	0.332	0.556	0.411	-1.03	-0.99	-1.59	-0.85	-1.28	182.3	89.1	91.8	60.5	101.4	74.9	1873.3	915.2	943.1	621.7	1041.8	769.1	1347.3	514.2	633.3	325.9	1041.8	469.1	2
FALSE	High	Unambiguous	VASAQCLSGTGSLR	[R].VASAQCLSGTGSLR.[V]	1xiodoTMT6plex [C6]	1xiodoTMT6plex [C6]			0.01926	0	0.441	1	1	3	731353768	731353768	731353768 [99-112]	0	1678.91	14	1.74	1.498	1.268	0.983	1.051	0.8	0.58	0.34	-0.02	0.07	79.6	138.5	119.2	100.9	78.3	83.6	1751.3	3047.5	2622.7	2220	1722.3	1840.2	1259.6	1712.3	1761.1	1163.8	1722.3	1122.4	3
FALSE	High	Unambiguous	LMNAYCDR	[K].LMNAYCDR.[QK]	1xiodoTMT6plex [C6]	1xiodoTMT6plex [C6]			0.120393	0.00257247	0.143	1	232	1	A0A287MC57	M1C0J7; A0A218XMF5; R0H2J0; A0A0B0MH24; A9NN85; A0A2P6QCS2; A0A0V0H2J3; A0A2I0B7R1; A0A2G2X2Z2; A0A1Q3BWC7; A0A1U8J3V8; M7YD03; A0A1E5V9F4; A0A251SWS2; F2CW55; A0A0D9YJ82; A0A2H5PS56; A9TTS3; B9SU01; K4DBD9; A0A218VRF2; A0A2P4HMR7; A0A1U8HGE9; A0A0D9YJ81; M4EC90; D7TED8; Q9FLP6; M0TLI8; A0A1D5UUN4; A0A1Q3D074; M1C498; V4U4M1; D2X5S7; A0A072UWX4; A0A2K3LV39; V7B844; A0A067FF14; A0A2P2J2J7; V4UF13;…	A0A287MC57 [154-161]	0	1314.65	8	0.816	0.825	0.419	0.652	0.644	-0.29	-0.28	-1.25	-0.62	-0.64	137.7	112.4	113.6	57.7	89.8	88.6	657.7	537	542.7	275.6	429	423.3	473	301.7	364.4	144.5	429	258.2	1
FALSE	High	Unambiguous	ADSLPCPFYIGR	[K].ADSLPCPFYIGR.[E]	1xiodoTMT6plex [C6]	1xiodoTMT6plex [C6]			0.121883	0.00257247	0.141	1	1	1	731364406	731364406	731364406 [59-70]	0	1667.88	12	0.211	0.465	0.232	0.573	0.212	-2.24	-1.1	-2.1	-0.8	-2.24	222.8	47	103.6	51.8	127.7	47.2	621.9	131.3	289.2	144.6	356.4	131.7	447.3	73.8	194.2	75.8	356.4	80.3	1
FALSE	High	Unambiguous	NNGNPCDGDVLTDVTR	[K].NNGNPCDGDVLTDVTR.[Y]	1xiodoTMT6plex [C6]	1xiodoTMT6plex [C6]			0.100727	0.00224036	0.172	1	3	1	731336868	A0A2I4DV02; 731336868; A0A2I4HH71	731336868 [349-364]	0	2018.98	16	0.906	0.935	1.067	0.909	1.041	-0.14	-0.1	0.09	-0.14	0.06	102.4	92.8	95.8	109.3	93.1	106.6	339.4	307.4	317.4	362.2	308.4	353.3	244.1	172.7	213.1	189.9	308.4	215.5	1
FALSE	High	Unambiguous	FWEVVCDEHGLDPTGR	[K].FWEVVCDEHGLDPTGR.[YC]	1xiodoTMT6plex [C6]	1xiodoTMT6plex [C6]			0.18067	0.00627731	0.077	1	184	2	J3LJ13	A0A2H5NU63; A0A0D9V6W4; A0A0E0FK81; A0A0D9YGB0; B9I2F1; A0A097CPK2; A0A2I0JPG6; B9H8S3; A0A287LTU6; A0A061GU05; Q43697; Q9ZRB1; A0A1Q3CVI3; C5XMJ4; A0A1R3G5K5; A0A1U8BDJ4; A0A2G5EW64; A0A0C9S5R5; A0A2P5Y510; A9P8S7; A0A1R3J5D4; B6T505; A0A097CPL0; M0RHN8; A0A251N950; V4T2M6; W9QPA8; A2ZRW5; A0A287LTT9; A0A2C9W085; P29502; A0A0D2N930; P29514; J3KYV5; 731324610; T1LKT2; B7ZZ40; A0A1D6FAY2; A0A249Y7…	J3LJ13 [20-35]	0	2189.06	16	0.856	0.96	0.972	1.027	0.633	-0.22	-0.06	-0.04	0.04	-0.66	110.1	94.3	105.7	107	113.1	69.7	386.9	331.4	371.4	376	397.4	244.8	278.3	186.2	249.4	197.1	397.4	149.3	1
FALSE	High	Unambiguous	QEEVICPGVNSGFFDTMR	[K].QEEVICPGVNSGFFDTMR.[A]	1xiodoTMT6plex [C6]	1xiodoTMT6plex [C6]			0.0067701	0	0.611	1	1	1	731352863	731352863	731352863 [290-307]	0	2358.14	18	0.68	0.385	0.79	0.68	0.347	-0.56	-1.38	-0.34	-0.56	-1.53	154.6	105.2	59.5	122.1	105.1	53.6	1317.3	896.1	506.8	1040	895.2	456.6	947.4	503.5	340.3	545.2	895.2	278.5	1
FALSE	High	Unambiguous	NDMPCGSTIGPILASGVGIR	[R].NDMPCGSTIGPILASGVGIR.[T]	1xiodoTMT6plex [C5]	1xiodoTMT6plex [C5]			0.0298054	0	0.37	1	37	1	731327772	A0A2I0WJJ6; A0A1J7IY67; A0A0D6R3V7; A0A1U8MQJ6; A0A1D1XH39; W9S8L4; A0A1U8FXA5; A0A059CY79; D7SGV2; C5IH84; A0A200QY99; A0A2G3CCY5; A0A061FYT0; A0A1U7ZCI0; M0RIT2; A0A2P5WT54; K4BJY1; A0A199V4C0; A0A0C9S8A4; A0A1R3IN53; A0A2G2X870; A0A059CXI3; A0A1R3HN44; A0A0V0IE36; A0A2H3Z2T3; C5IH83; A0A2P2L4K4; M1B818; A0A0B0MCI8; A0A2P2L4G1; A0A2H3Z2U8; A0A2P2L4G3; 731327772; B9RAJ0; A0A2I4EW49; A0A2P2L4H0; …	731327772 [420-439]	0	2287.21	20	0.822	1.06	1.171	0.726	0.954	-0.28	0.08	0.23	-0.46	-0.07	104.6	86.1	110.9	122.6	76	99.8	230.2	189.4	244.1	269.7	167.2	219.7	165.6	106.4	163.9	141.4	167.2	134	1
FALSE	High	Unambiguous	LQQQCPQGSASTLVVPMDTR	[R].LQQQCPQGSASTLVVPMDTR.[T]	1xiodoTMT6plex [C5]	1xiodoTMT6plex [C5]			0.000103358	0	1.291	1	1	7	731321380	731321380	731321380 [230-249]	0	2488.28	20	0.833	0.965	1.037	1.18	1.1	-0.26	-0.05	0.05	0.24	0.14	98.1	81.7	94.7	101.7	115.8	108	2406.9	2005.3	2322.3	2495	2839.4	2648.7	1731.1	1126.7	1559.4	1308	2839.4	1615.6	7
FALSE	High	Unambiguous	VQNLCDAANEEVAEEER	[K].VQNLCDAANEEVAEEER.[V]	1xiodoTMT6plex [C5]	1xiodoTMT6plex [C5]			0.0487497	0	0.29	1	1	1	731349234	731349234	731349234 [220-236]	0	2248.07	17	0.569	0.812	0.672	0.776	0.659	-0.81	-0.3	-0.57	-0.37	-0.6	133.7	76	108.6	89.8	103.7	88.1	239.4	136.2	194.5	160.8	185.7	157.7	172.2	76.5	130.6	84.3	185.7	96.2	1
FALSE	High	Unambiguous	YAESCMYSPAYR	[K].YAESCMYSPAYR.[STQN]	1xiodoTMT6plex [C5]	1xiodoTMT6plex [C5]			0.0749788	0.000962316	0.22	1	22	2	A0A2P4L092	Q9M4Q9; V4SHQ1; A0A2I0B6H2; A0A067L0V8; A0A0J8B665; A0A059AJ14; A0A067ELH7; A0A0K9QX82; A0A2H5N207; A0A1R3HL27; A0A059AI03; A0A067E9B7; I4AXX7; G1DE54; A0A2C9UZ88; A0A1R3H887; A0A0K9RDB6; 731353916; A0A2P4L092; A0A067E9C1; A0A2I0KRC0; B9RQE8	A0A2P4L092 [641-652]	0	1769.82	12	1.023	1.284	1.123	1.117	1.118	0.03	0.36	0.17	0.16	0.16	90	92.1	115.6	101.1	100.5	100.6	1583.5	1620.5	2033.1	1778.6	1768.7	1770.5	1138.9	910.5	1365.2	932.4	1768.7	1079.9	2
FALSE	High	Unambiguous	FLEECLASANR	[K].FLEECLASANR.[H]	1xiodoTMT6plex [C5]	1xiodoTMT6plex [C5]			0.0100973	0	0.546	2	4	1	731377532; 731333999	A0A0K9RUA7; A0A0K9RCQ9; 731377532; 731333999	731377532 [441-451]; 731333999 [465-475]	0	1581.83	11	0.483	0.496	0.689	1.875	0.384	-1.05	-1.01	-0.54	0.91	-1.38	121.8	58.8	60.4	83.9	228.4	46.7	1047.1	505.5	519.7	721.2	1963.5	401.8	753.1	284	349	378.1	1963.5	245.1	1
FALSE	High	Unambiguous	NIISCGEDAIIR	[K].NIISCGEDAIIR.[V]	1xiodoTMT6plex [C5]	1xiodoTMT6plex [C5]			0.018792	0	0.445	1	1	1	731334129	731334129	731334129 [160-171]	0	1632.89	12	0.661	0.736	0.609	0.638	0.776	-0.6	-0.44	-0.72	-0.65	-0.37	135.7	89.8	99.9	82.6	86.6	105.3	642.9	425.2	473.3	391.4	410.2	498.7	462.4	238.9	317.8	205.2	410.2	304.2	1
FALSE	High	Unambiguous	ANGGCNNAYNYSYSR	[R].ANGGCNNAYNYSYSR.[F]	1xiodoTMT6plex [C5]	1xiodoTMT6plex [C5]			0.0213828	0	0.424	1	2	1	731331165	Q949L8; 731331165	731331165 [161-175]	0	1982.9	15	0.46	1.075	0.553	0.846	1.598	-1.12	0.1	-0.85	-0.24	0.68	108.4	49.8	116.6	60	91.8	173.3	408.1	187.6	438.9	225.9	345.3	652.2	293.5	105.4	294.7	118.4	345.3	397.8	1
FALSE	High	Unambiguous	LSLYCPGVGTR	[R].LSLYCPGVGTR.[W]	1xiodoTMT6plex [C5]	1xiodoTMT6plex [C5]			0.116032	0.00257247	0.149	1	1	1	731342327	731342327	731342327 [466-476]	0	1494.83	11	0.697	1.248	0.883	1.96	1.031	-0.52	0.32	-0.18	0.97	0.04	88	61.3	109.8	77.7	172.5	90.7	472	329.1	589.3	417	925.4	486.8	339.5	184.9	395.7	218.6	925.4	296.9	1
FALSE	High	Unambiguous	FDSGCGWPAFYEGLPGAITR	[K].FDSGCGWPAFYEGLPGAITR.[T]	1xiodoTMT6plex [C5]	1xiodoTMT6plex [C5]			0.0156259	0	0.475	1	1	1	731359814	731359814	731359814 [156-175]	0	2473.22	20	0.726	1.055	0.791	0.815	0.638	-0.46	0.08	-0.34	-0.3	-0.65	119.4	86.7	126	94.4	97.3	76.2	219.3	159.1	231.4	173.4	178.7	139.8	157.7	89.4	155.4	90.9	178.7	85.3	1
FALSE	High	Unambiguous	YAIICQENGLVPIVEPEILVDGSHDIDR	[R].YAIICQENGLVPIVEPEILVDGSHDIDR.[C]	1xiodoTMT6plex [C5]	1xiodoTMT6plex [C5]			0.00131054	0	0.878	1	8	6	731345323	A0A2G5D6M7; 731345323; A0A2G5DIJ2; A0A200Q2K8; A0A2G5D6N7; Q9M4M9; A0A200Q637; A0A022RI82	731345323 [169-196]	0	3436.8	28	0.812	0.801	0.916	0.727	0.97	-0.3	-0.32	-0.13	-0.46	-0.04	114.8	93.2	92	105.2	83.4	111.4	144.5	117.3	115.7	132.4	105	140.2	103.9	65.9	77.7	69.4	105	85.5	6
FALSE	High	Unambiguous	VEQLCPFPYDLVQR	[RK].VEQLCPFPYDLVQR.[E]	1xiodoTMT6plex [C5]	1xiodoTMT6plex [C5]			0.018223	0	0.45	1	73	1	731358722	A0A1J7GYD3; M1CNJ1; A0A2G2XA41; D9ZC07; A0A1S3DZJ4; A0A2K3LIE9; A0A0B2QU14; A0A1J7H347; D9ZC09; D9ZC29; A0A0S3SLG3; E9N1D1; A0A2G2ZFV9; V7B462; E9N1E3; D9ZC11; A0A2H5QIG2; K4BPJ0; A0A2G3CE35; I1NF12; A0A072W2L0; E9N1F4; E9N1G9; E9N1H4; G7KVS0; A0A1S3E3E2; D9ZC05; E9N1D7; E9N1D3; A0A151U7Z5; E9N1E0; A0A2P5DPW2; K7MVB9; E9N1C8; E9N1D9; A0A1U8GLQ5; A0A2K3NFT4; D9ZC12; E9N1G1; E9N1G8; A0A1S3V0Z8; A0A…	731358722 [929-942]	0	2036.08	14	0.661	0.882	0.982	1.022	1.016	-0.6	-0.18	-0.03	0.03	0.02	107.9	71.3	95.1	105.9	110.3	109.6	305.1	201.6	269	299.5	311.9	310	219.4	113.3	180.6	157	311.9	189.1	1
FALSE	High	Unambiguous	VLNACSEAEAWLR	[K].VLNACSEAEAWLR.[E]	1xiodoTMT6plex [C5]	1xiodoTMT6plex [C5]			0.0469835	0	0.296	1	1	1	731359455	731359455	731359455 [742-754]	0	1790.94	13	0.448	0.629	0.657	1.045	0.994	-1.16	-0.67	-0.61	0.06	-0.01	125.7	56.3	79	82.5	131.4	125	427	191.3	268.5	280.4	446.4	424.6	307.1	107.5	180.3	147	446.4	259	1
FALSE	High	Unambiguous	SSICYIDGDEGILR	[KR].SSICYIDGDEGILR.[Y]	1xiodoTMT6plex [C4]	1xiodoTMT6plex [C4]			0.169893	0.00563879	0.087	1	65	1	731356945	A0A2G5CRC5; A0A200QJ25; Q0E2K1; A0A2H3Y729; A0A2P6S031; A0A2H5PHC5; A0A0E0JXQ9; A0A2I4F961; A0A022QYH6; A0A1R3L7Q7; J3LB53; A0A199V476; A0A0D9VE32; A0A0D9YPP5; A0A1D5YZH3; A0A287EA59; A0A0K9QRK2; A0A251SMI6; A0A178VNV2; I1HZ21; A0A2P4H827; A0A2H5PHE1; F2D319; B9F4F6; Q6EUF8; A0A1D1YKQ4; A0A0D3F2T7; A0A0E0NC51; I1NYS4; D7LW72; A0A0A9NK74; A0A1U8BAL0; A0A2J6LZV2; M7ZHY4; A0A2H3ZF23; M8CUN3; A0A118K…	731356945 [116-129]	0	1869.96	14	0.93	1.074	1.204	0.798	1.265	-0.1	0.1	0.27	-0.33	0.34	95.7	89	102.8	115.2	76.3	121	224.7	208.9	241.3	270.5	179.2	284.1	161.6	117.4	162	141.8	179.2	173.3	1
FALSE	High	Unambiguous	VVSCADITSLAAR	[R].VVSCADITSLAAR.[E]	1xiodoTMT6plex [C4]	1xiodoTMT6plex [C4]			0.00920752	0	0.561	1	1	7	731313635	731313635	731313635 [126-138]	0	1634.91	13	0.665	1.056	0.883	2.098	1.784	-0.59	0.08	-0.18	1.07	0.83	80.1	53.3	84.6	70.8	168.2	143	1603.7	1066.1	1693.7	1416.3	3364.7	2860.6	1153.4	599	1137.3	742.5	3364.7	1744.8	7
FALSE	High	Unambiguous	VSDCGLAQLANPSTTPNR	[R].VSDCGLAQLANPSTTPNR.[V]	1xiodoTMT6plex [C4]	1xiodoTMT6plex [C4]			0.00794401	0	0.585	1	1	1	731319183	731319183	731319183 [507-524]	0	2173.12	18	0.675	0.838	0.893	0.734	0.917	-0.57	-0.25	-0.16	-0.45	-0.13	118.6	80.1	99.4	106	87.1	108.7	243.6	164.5	204.2	217.6	178.9	223.3	175.2	92.4	137.1	114.1	178.9	136.2	1
FALSE	High	Unambiguous	MIICGGSAYPR	[KR].MIICGGSAYPR.[ED]	1xiodoTMT6plex [C4]	1xiodoTMT6plex [C4]			0.0428432	0	0.311	1	13	4	731325199	I0Z1Y0; A0A1Z4EAY0; A0A0J8FG73; A0A1S3TQZ1; C1N3S0; T2DNH0; V7C610; A0A1J7J1X8; C1E3R7; A0A151SJ95; A0A0S3R1Q7; K8EGR8; 731325199	731325199 [248-258]	0	1496.79	11	0.631	1.585	0.781	1.157	0.873	-0.66	0.66	-0.36	0.21	-0.2	99.6	62.9	157.8	77.7	115.2	86.9	2289.4	1445.5	3627.8	1787.5	2648.5	1999.2	1646.6	812.2	2436	937.1	2648.5	1219.4	2
FALSE	High	Unambiguous	VLACFSNNLLR	[R].VLACFSNNLLR.[GRHCQ]	1xiodoTMT6plex [C4]	1xiodoTMT6plex [C4]			0.0635071	0.000962316	0.247	1	248	1	A0A061GZT7	A0A140G0E7; A0A1Q3C9H7; A0A151SAJ3; G7IAU0; A0A287MRX6; A0A1D6G3X3; A0A1D6G3X4; M4DQ52; A0A2N9GW26; A0A0D2W9J5; A0A2I0AVZ6; A0A2K3PPN3; F2CXY7; A0A251NP05; A0A0B0MPF4; Q9ZUY6; I1LTQ2; A0A2P5WE98; A0A1D6MXL7; G8CND1; A0A078GBF1; A0A1D5VVK7; A0A1E5UPQ6; I1LTQ1; A0A078GXH8; A0A2R6P7A2; A0A251VI87; A0A251VPH0; A0A1D6G3X2; A0A1D6G3X0; M8BLJ5; D7SN69; D2D333; A0A200Q6C8; A0A162A743; A0A1D1XN87; I1LKW8;…	A0A061GZT7 [298-308]	0	1578.9	11	1.14	1.009	0.947	0.843	1.134	0.19	0.01	-0.08	-0.25	0.18	98.8	112.6	99.7	93.5	83.3	112	455.5	519.2	459.7	431.3	384.2	516.6	327.6	291.7	308.7	226.1	384.2	315.1	1
FALSE	High	Selected	MDICSVHDVVLVGGSTR	[K].MDICSVHDVVLVGGSTR.[I]	1xiodoTMT6plex [C4]	1xiodoTMT6plex [C4]			0.0947185	0.00187066	0.182	1	1	1	A0A166FTZ6	A0A166FTZ6	A0A166FTZ6 [211-227]	0	2117.1	17	1.258	1.194	1.416	0.762	1.29	0.33	0.26	0.5	-0.39	0.37	86.7	109.1	103.5	122.8	66.1	111.8	146.4	184.2	174.8	207.3	111.6	188.9	105.3	103.5	117.4	108.7	111.6	115.2	1
FALSE	High	Unambiguous	MTACQLAAVGPVPTSSTMVQPQQPMSEYTQR	[R].MTACQLAAVGPVPTSSTMVQPQQPMSEYTQR.[K]	1xiodoTMT6plex [C4]	1xiodoTMT6plex [C4]			0.00020206	0	1.182	1	1	2	731324950	731324950	731324950 [239-269]	0	3666.79	31	0.623	0.811	0.877	0.605	0.548	-0.68	-0.3	-0.19	-0.72	-0.87	134.4	83.8	109	117.9	81.3	73.6	378	235.6	306.5	331.5	228.8	207.1	271.9	132.4	205.8	173.8	228.8	126.3	2
FALSE	High	Unambiguous	NVVCGDLAPVYDRR	[K].NVVCGDLAPVYDRR.[L]	1xiodoTMT6plex [C4]	1xiodoTMT6plex [C4]			0.0608311	0.00054243	0.254	1	1	4	731344067	731344067	731344067 [205-218]	1	1906.02	14	2.772	1.502	2.05	1.97	1.091	1.47	0.59	1.04	0.98	0.13	57.8	160.2	86.8	118.4	113.8	63	964	2672	1447.7	1976.2	1899.1	1051.4	693.3	1501.3	972.1	1036	1899.1	641.3	4
FALSE	High	Unambiguous	VIACVGETLEQR	[KR].VIACVGETLEQR.[ED-Q]	1xiodoTMT6plex [C4]	1xiodoTMT6plex [C4]			0.0125997	0	0.51	2	203	10	731315260; 731348961	A0A2P6SKH4; A0A2J6JYU9; A0A287K580; A0A2G3C4U3; A0A067FPN0; A0A1U8GX82; D1LWT8; B3F2T4; A0A059U7E2; A0A2P6UZB2; A0A1X9Y0Q6; B6SIG5; A0A2J6MDU6; A0A2P4JR05; M1CNK1; M0RV17; A0A1J6JAH6; A0A2I0X4M6; A0A1X9Y148; A0A1D6MLF6; D7SKE9; A0A2K1YXD7; A9P8M1; I1VW02; A0A0D3BXQ9; D7TLU7; A0A1D5VIX2; A0A0C9QSE0; A0A1U7ZTN7; A0A1S4D3H6; A0A068TV19; A0A103YEQ4; A0A199UEZ4; A0A103Y9S7; I1VW35; A0A2I4E560; A0A1D1Y…	731315260 [124-135]; 731348961 [124-135]	0	1646.91	12	1.029	1.223	0.881	0.694	1.206	0.04	0.29	-0.18	-0.53	0.27	99.4	102.4	121.6	87.6	69	120	8051.9	8288.4	9849.1	7095.6	5584.6	9712.8	5791.1	4657	6613.6	3719.8	5584.6	5924.3	10
FALSE	High	Rejected	VVSCADIATLAAR	[R].VVSCADIATLAAR.[E]	1xiodoTMT6plex [C4]	1xiodoTMT6plex [C4]			0.12803	0.00257247	0.133	0	2	2		A0A0K9QRB9; P93545		0	1618.91	13
FALSE	High	Unambiguous	NVVCGDLAPVYDR	[K].NVVCGDLAPVYDR.[R]	1xiodoTMT6plex [C4]	1xiodoTMT6plex [C4]			0.00308115	0	0.739	1	1	10	731344067	731344067	731344067 [205-217]	0	1749.92	13	1.542	1.076	1.348	1.126	0.543	0.62	0.11	0.43	0.17	-0.88	90.4	139.4	97.3	121.9	101.8	49.1	4353.9	6713	4683.6	5867.9	4901.5	2365.4	3131.4	3771.8	3145	3076.2	4901.5	1442.8	10
FALSE	High	Unambiguous	VVSCADLTALAAR	[R-].VVSCADLTALAAR.[DEQ]	1xiodoTMT6plex [C4]	1xiodoTMT6plex [C4]			0.0186768	0	0.446	1	26	21	731313639	Q94IQ1; A0A2I4GRR4; K4BTH7; A0A2I4GRS2; A0A0K9QU56; A0A2N9J1I4; A0A1U8AQM2; A0A2P5FEN0; 731313639; A0A2P5BV31; A0A0V0HSY9; A0A1S4C0F0; Q5PT37; Q43032; P84714; A0A2N9IZG7; I3T832; A0A068UT45; A0A1U7W0R4; V5T6X3; E2J5C4; M1CCJ9; P93547; A0A2R6R2Q5; C5XIN9; A0A166G7E2	731313639 [126-138]	0	1618.91	13	0.596	0.834	0.769	1.584	0.993	-0.75	-0.26	-0.38	0.66	-0.01	103.9	61.9	86.7	79.8	164.6	103.1	2294.4	1366.5	1914	1763.3	3635.5	2277.4	1650.2	767.8	1285.2	924.4	3635.5	1389.1	7
FALSE	High	Unambiguous	VIVCEYILPVAPETNHAAR	[K].VIVCEYILPVAPETNHAAR.[T]	1xiodoTMT6plex [C4]	1xiodoTMT6plex [C4]			0.0134816	0	0.499	1	1	1	731321402	731321402	731321402 [290-308]	0	2424.33	19	0.588	0.57	0.695	0.499	0.71	-0.77	-0.81	-0.53	-1	-0.49	147.7	86.9	84.2	102.6	73.7	104.9	476.9	280.5	271.6	331.3	237.8	338.6	343	157.6	182.4	173.7	237.8	206.5	1
FALSE	High	Rejected	VIACVGETLQER	[K].VIACVGETLQER.[E]	1xiodoTMT6plex [C4]	1xiodoTMT6plex [C4]			0.0982789	0.00187066	0.176	0	2	1		A0A2J6L9F1; Q41186		0	1646.91	12
FALSE	High	Unambiguous	NWFCTDQSR	[K].NWFCTDQSR.[S]	1xiodoTMT6plex [C4]	1xiodoTMT6plex [C4]			0.19213	0.00652397	0.067	1	2	1	731322678	A0A0K9RG39; 731322678	731322678 [545-553]	0	1485.71	9	0.715	0.956	0.646	1.224	1.059	-0.48	-0.06	-0.63	0.29	0.08	107.2	76.6	102.5	69.2	131.2	113.5	648.3	463.3	620	418.5	793.6	686.6	466.3	260.3	416.3	219.4	793.6	418.8	1
FALSE	High	Selected	VFDCMQKPAFVFDGR	[K].VFDCMQKPAFVFDGR.[N]	1xiodoTMT6plex [C4]	1xiodoTMT6plex [C4]			0.0847925	0.000962316	0.2	1	1	1	A0A0S3T1M9	A0A0S3T1M9	A0A0S3T1M9 [433-447]	0	2089.06	15	1.177	1.149	1.437	0.63	1.205	0.23	0.2	0.52	-0.67	0.27	90.9	107	104.5	130.7	57.3	109.6	70.6	83.1	81.2	101.5	44.5	85.1	50.8	46.7	54.5	53.2	44.5	51.9	1
FALSE	High	Unambiguous	INSCISIEPSLR	[K].INSCISIEPSLR.[M]	1xiodoTMT6plex [C4]	1xiodoTMT6plex [C4]			0.148393	0.00292848	0.109	1	1	1	B9T2R9	B9T2R9	B9T2R9 [560-571]	0	1660.93	12	1.094	1.192	1.436	0.845	1.43	0.13	0.25	0.52	-0.24	0.52	85.7	93.8	102.2	123.1	72.5	122.6	100.7	110.2	120	144.6	85.1	143.9	72.4	61.9	80.6	75.8	85.1	87.8	1
FALSE	High	Unambiguous	VVSCADITTLAAR	[R].VVSCADITTLAAR.[E]	1xiodoTMT6plex [C4]	1xiodoTMT6plex [C4]			0.0208631	0	0.428	1	1	7	731313633	731313633	731313633 [123-135]	0	1648.93	13	0.596	0.712	0.722	0.914	0.918	-0.75	-0.49	-0.47	-0.13	-0.12	123.4	73.6	87.9	89.1	112.7	113.3	3318.2	1978.9	2364.1	2395.8	3031.3	3046.8	2386.5	1111.9	1587.5	1256	3031.3	1858.4	7
FALSE	High	Unambiguous	RATCTINYGNELPLAQGINFG	[R].RATCTINYGNELPLAQGINFG.[-]	1xiodoTMT6plex [C4]	1xiodoTMT6plex [C4]			0.0619639	0.00054243	0.251	1	1	1	731348057	731348057	731348057 [488-508]	1	2581.34	21	0.912	1.024	1.019	0.85	1.152	-0.13	0.03	0.03	-0.23	0.2	100.7	91.9	103.1	102.7	85.6	116	337.6	307.9	345.6	344.1	287	388.9	242.8	173	232.1	180.4	287	237.2	1
FALSE	High	Unambiguous	LASCMIASGSDDGSFSIR	[R].LASCMIASGSDDGSFSIR.[D]	1xiodoTMT6plex [C4]	1xiodoTMT6plex [C4]			0.00473892	0	0.669	1	4	2	A0A2I0XJ63	A0A2I0XJ63; A0A199UJR3; A0A2I0IZF8; A0A0J8B2Z1	A0A2I0XJ63 [391-408]	0	2146.05	18	1.015	1.149	1.223	0.721	1.097	0.02	0.2	0.29	-0.47	0.13	96.7	98.2	111.1	118.2	69.8	106.1	232.8	236.4	267.3	284.6	167.9	255.3	167.4	132.8	179.5	149.2	167.9	155.7	1
FALSE	High	Unambiguous	MNCVQEWPEPIVR	[-].MNCVQEWPEPIVR.[V]	1xiodoTMT6plex [C3]; 1xAcetyl [N-Term]	1xiodoTMT6plex [C3]; 1xAcetyl [N-Term]	731315023 1xAcetyl [N-Term]	731315023 1xAcetyl [N-Term]	0.0953028	0.00187066	0.181	1	1	1	731315023	731315023	731315023 [1-13]	0	1972	13	0.694	0.799	0.983	1.01	0.743	-0.53	-0.32	-0.02	0.01	-0.43	114.7	79.7	91.7	112.8	115.9	85.3	85.4	59.3	68.2	83.9	86.2	63.4	61.4	33.3	45.8	44	86.2	38.7	1
FALSE	High	Unambiguous	IVCENTLDAR	[KR].IVCENTLDAR.[L]	1xiodoTMT6plex [C3]	1xiodoTMT6plex [C3]			0.101348	0.00224036	0.171	1	188	4	A0A0A7B1S3	A0A078JRB4; A0A078F1M7; A0A0V0HNB8; F6HMT9; A0A1J6I7D4; Q84T14; I3S5S1; A0A1U7YVS7; A0A0L9VQD9; I3RZI4; K3ZD99; A0A251NZ17; J3L2J5; I1KPH3; A0A2I4FLA8; A0A1J3CHC9; A0A1J3G1U8; A0A175YJB7; A0A0E0FIM5; A0A0D2Q1C8; A0A2G3ADM6; A9NNQ7; A0A0D2U984; V4N088; M4F2F0; A0A2I4EIU7; V4TM00; A0A178UT42; A0A1U8F810; 731344477; V4KKK0; A0A067G9Z2; A0A078JMF5; A0A0D9V3Q9; A0A0A7B1S3; R0GX67; A0A178VP35; A0A1U7ZR…	A0A0A7B1S3 [199-208]	0	1462.79	10	0.889	0.922	0.88	0.842	0.862	-0.17	-0.12	-0.18	-0.25	-0.21	111.2	98.9	102.5	97.9	93.6	95.9	2798.7	2487.6	2579.6	2462.4	2356.4	2413.3	2012.9	1397.7	1732.2	1290.9	2356.4	1472	4
FALSE	High	Unambiguous	QQCPTNVNPNLVVFMDPR	[K].QQCPTNVNPNLVVFMDPR.[T]	1xiodoTMT6plex [C3]	1xiodoTMT6plex [C3]			0.050272	0	0.285	1	1	1	731337871	731337871	731337871 [241-258]	0	2401.23	18	0.775	0.996	0.923	0.678	1.055	-0.37	-0.01	-0.12	-0.56	0.08	110.6	85.7	110.1	102	75	116.6	184.8	143.3	184.1	170.5	125.3	194.9	132.9	80.5	123.6	89.4	125.3	118.9	1
FALSE	High	Selected	NNCPYTVWGAAVPGGGQQMNSGSTWTVTANPGQQGAR	[K].NNCPYTVWGAAVPGGGQQMNSGSTWTVTANPGQQGAR.[I]	1xiodoTMT6plex [C3]	1xiodoTMT6plex [C3]			1.14326e-05	0	1.649	1	1	1	731331163	731331163	731331163 [34-70]	0	4091.94	37	0.726	1.017	0.607	1.177	1.788	-0.46	0.02	-0.72	0.23	0.84	95	69	96.6	57.7	111.8	169.9	109.3	79.4	111.1	66.4	128.6	195.4	78.6	44.6	74.6	34.8	128.6	119.2	1
FALSE	High	Unambiguous	AYCQSAATLNLLR	[R].AYCQSAATLNLLR.[ASD]	1xiodoTMT6plex [C3]	1xiodoTMT6plex [C3]			0.103872	0.00224036	0.167	2	136	1	M5XCR9; A0A059BL19	A0A218X869; B9T0A7; V4T255; A0A1U7XV16; A0A078G7H9; A0A2K2ACZ0; A0A0D6QVS2; D3YIJ4; A0A2G5E8H0; A0A2I0HU62; A0A067XH53; A0A2P6PIR9; A0A2P5R414; B9RJN2; R0IS21; A0A2K2AHK6; A0A2G5E8N8; H9C956; A0A2R6QYG0; A0A067F076; A0A1R3K2D8; A0A0K9R7P0; A0A0V0IHV9; A0A0D2S706; A0A103XX50; M0RMR2; A0A2K2ACX4; W9RWI1; A0A2J6LKY9; A0A2H5NEV2; A0A251TZC5; K4BTY6; A0A1J3FBQ6; A0A2H5NN99; G9BF70; A0A1Q3CSN6; A0A2R6R…	M5XCR9 [305-317]; A0A059BL19 [231-243]	0	1752.96	13	0.986	1.19	1.247	0.708	1.182	-0.02	0.25	0.32	-0.5	0.24	95	93.7	113.1	118.5	67.2	112.4	274	270.2	326.1	341.8	193.9	324	197.1	151.8	219	179.2	193.9	197.6	1
FALSE	High	Unambiguous	SICPSSGGDNNISPMDYATPR	[K].SICPSSGGDNNISPMDYATPR.[A]	1xiodoTMT6plex [C3]	1xiodoTMT6plex [C3]			0.00756262	0	0.593	1	1	1	731312143	731312143	731312143 [249-269]	0	2511.18	21	0.825	0.927	1.086	0.716	1.07	-0.28	-0.11	0.12	-0.48	0.1	106.7	88.1	98.9	115.9	76.3	114.1	325.4	268.6	301.6	353.3	232.8	348.1	234	150.9	202.5	185.2	232.8	212.3	1
FALSE	High	Rejected	NNCPYTVWGAAVPGGGKQMNSGSTWTVTANPGQQGAR	[K].NNCPYTVWGAAVPGGGKQMNSGSTWTVTANPGQQGAR.[I]	1xiodoTMT6plex [C3]	1xiodoTMT6plex [C3]			1.12928e-05	0	1.651	1	1	1	731331155	731331155	731331155 [91-127]	1	4091.98	37
FALSE	High	Unambiguous	LVCTLGPASR	[K].LVCTLGPASR.[STA]	1xiodoTMT6plex [C3]	1xiodoTMT6plex [C3]			0.206845	0.00685958	0.055	1	277	2	731317849	R0H345; A0A200QS20; A0A0D2P9F5; F2DEG3; K7TPR9; A0A078FIK7; A0A0E0KWT9; A0A2I0X6L8; A0A087GBD4; A0A2H5PZ24; A0A2I0AXN7; A0A103XHT2; A0A2J6JI06; A0A2K3LWD1; A0A1J7GXC6; A0A2J6M7X6; A0A2G9I6D3; Q6IUP7; A0A0K9RFR5; A0A1R3GIZ6; A0A0B0NNV6; A0A2G2XPN6; A0A1S2XJJ5; A0A067KZP4; V4LLW4; A0A1J6ITL2; A0A173N2C4; A0A2P5XUY2; M5W5K0; M4FC38; A0A1D5XJK1; M0T7I2; A0A2I0JYH9; A0A078G853; W1NNF7; A0A1E5VB24; Q5F…	731317849 [24-33]	0	1345.78	10	0.855	0.838	0.997	1.034	0.901	-0.23	-0.25	0	0.05	-0.15	106.7	91.2	89.4	106.4	110.3	96.1	536.8	459	449.9	535.4	555.1	483.8	386.1	257.9	302.1	280.7	555.1	295.1	1
FALSE	High	Unambiguous	AVCMISNSTSVAEVFSR	[RK].AVCMISNSTSVAEVFSR.[ILV]	1xiodoTMT6plex [C3]	1xiodoTMT6plex [C3]			0.00804233	0	0.583	2	252	1	A0A0D5MER0; A0A2G2V8B9	A0A251V7F1; M1SQ43; A0A067GNP4; A0A022R715; A0A078GVZ3; V4SZ59; A0A0S0N5Y9; A0A0D2T2R1; A0A1U8IE88; 731339295; X2F6P0; A0A2G5ENT8; A0A1Q3AYV8; A0A2G3D9Q8; A0A2C9V4F5; A0A161XEE0; A0A2I4HD86; A0A2G2Y9E2; A0A2R6RKU7; M1D0L3; A0A0S3T5B1; A0A2N9GCV5; Q93XB1; A0A2P4MVN0; A0A2R6R373; A0A0K9NLD4; A0A2G5DSW1; A0A1J7G8A9; D8SE24; P33629; A0A0A0KIM4; J9RUV2; A0A2R3TV97; A0A2G9GQS8; A0A2G5DTD9; A0A0D5MER0; …	A0A0D5MER0 [375-391]; A0A2G2V8B9 [374-390]	0	2130.09	17	1.062	1.216	1.141	0.655	1.024	0.09	0.28	0.19	-0.61	0.03	98.4	104.5	119.6	112.2	64.5	100.7	170.7	181.4	207.6	194.8	111.9	174.8	122.8	101.9	139.4	102.1	111.9	106.6	1
FALSE	High	Unambiguous	NVCTEAGMSAIR	[R].NVCTEAGMSAIR.[A]	1xiodoTMT6plex [C3]	1xiodoTMT6plex [C3]			0.0100354	0	0.547	1	128	1	A0A1U8HNI4	A0A1D6DFX7; A0A2R6RHE3; A0A0A0LNP0; M0U530; A0A0C9RX76; M5VVW6; A0A2I0A2V3; A0A2I4GIX3; A0A1S3BB45; M8B876; A9PEV6; B9H0U4; A0A0D2NAP9; A0A0D2QNZ9; W9S5D2; A0A1U8PD04; A0A287TU28; A0A2I4E7E6; B9H4F7; J3LAM7; A0A1D1YX25; 731358589; A0A2P5W899; A0A2P5XPE9; A0A1J7IPY8; B7FFY0; A0A1U8J9K4; A0A1U8HNI4; A0A2P2M9D9; A0A199UT52; A0A2G5EAM2; A0A200RA10; A0A0K9PA76; M0TIE9; A0A124SCB2; A0A1S2Y8C8; A0A0Q3K9…	A0A1U8HNI4 [543-554]	0	1580.81	12	0.792	1.15	1.116	1.056	0.88	-0.34	0.2	0.16	0.08	-0.18	100.1	79.3	115.1	111.7	105.7	88.1	636.5	504.4	732	710.2	672.3	560.4	457.8	283.4	491.5	372.3	672.3	341.8	1
FALSE	High	Unambiguous	LECDGGNPATVNAR	[R].LECDGGNPATVNAR.[I]	1xiodoTMT6plex [C3]	1xiodoTMT6plex [C3]			0.00621157	0	0.625	1	1	1	731352259	731352259	731352259 [239-252]	0	1745.88	14	0.451	0.504	0.55	1.029	0.85	-1.15	-0.99	-0.86	0.04	-0.23	136.9	61.7	69	75.3	140.8	116.3	382.8	172.5	192.9	210.4	393.8	325.3	275.3	96.9	129.5	110.3	393.8	198.4	1
FALSE	High	Unambiguous	HGCSNVVNLELLPQPPNSR	[R].HGCSNVVNLELLPQPPNSR.[A]	1xiodoTMT6plex [C3]	1xiodoTMT6plex [C3]			0.113212	0.00257247	0.153	1	3	1	731321657	731321663; 731321657; 731321661	731321657 [2006-2024]	0	2403.28	19	1.194	1.139	1.389	0.798	1.29	0.26	0.19	0.47	-0.33	0.37	88.1	105.2	100.4	122.4	70.3	113.6	78.7	94	89.7	109.3	62.8	101.5	56.6	52.8	60.2	57.3	62.8	61.9	1
FALSE	High	Selected	SVCTEAGMYAIR	[R].SVCTEAGMYAIR.[AS]	1xiodoTMT6plex [C3]	1xiodoTMT6plex [C3]			0.0722624	0.000962316	0.226	1	189	2	A0A103XLE4	A0A1D6AAJ0; A0A287VYF0; I1JS66; A0A2J7ZQ42; A0A199VP89; A0A2J6L7E7; A0A287UY80; A0A2H3ZEQ4; A0A0D3BQH0; A0A103YB16; A0A1R3HJJ7; A0A0A9U6S2; A0A0D9VLW8; K4LJM0; C6TEK4; U5FHC0; M1A1A0; A0A2R6PV42; A0A1D6HME5; A0A2K3KV55; A0A1D6AAJ1; A0A2P5DYB7; A0A0D2UHX3; A0A067KG48; A0A1R3H6K3; A0A1U8PHA3; V4NWE6; A0A1U8FAJ3; A0A1J6J5T4; A0A287VYJ3; A0A218WND7; C6TCR9; K4C745; A0A2I0JTP5; A0A1D1ZVS8; K3XX43; M4C…	A0A103XLE4 [600-611]	0	1629.83	12	0.976	1.1	1.133	0.833	1.015	-0.03	0.14	0.18	-0.26	0.02	99.1	96.7	109	112.2	82.5	100.5	1412.1	1378.3	1553	1599.5	1175.7	1432.7	1015.6	774.4	1042.8	838.5	1175.7	873.9	2
FALSE	High	Unambiguous	NNCPYTVWGAAVPGGGR	[KR].NNCPYTVWGAAVPGGGR.[Q]	1xiodoTMT6plex [C3]	1xiodoTMT6plex [C3]			0.000900579	0	0.939	1	3	13	731331165	Q6PP01; Q2A774; 731331165	731331165 [33-49]	0	2048.03	17	0.876	1.62	0.879	1.018	2.115	-0.19	0.7	-0.19	0.03	1.08	79.9	70	129.5	70.3	81.3	169	3709.4	3248.6	6009.9	3261.3	3774.5	7845.1	2667.9	1825.3	4035.6	1709.7	3774.5	4785.1	13
FALSE	High	Unambiguous	VDCGSLGIVSR	[R].VDCGSLGIVSR.[D]	1xiodoTMT6plex [C3]	1xiodoTMT6plex [C3]			0.058989	0.00054243	0.259	1	1	2	731323607	731323607	731323607 [178-188]	0	1434.79	11	0.537	1.129	0.874	1.083	1.036	-0.9	0.17	-0.19	0.12	0.05	106	56.9	119.7	92.7	114.9	109.8	508.3	272.8	573.6	444.3	550.6	526.4	365.6	153.3	385.2	232.9	550.6	321.1	2
FALSE	High	Rejected	NNCPYTVWAGAVPGGGR	[R].NNCPYTVWAGAVPGGGR.[Q]	1xiodoTMT6plex [C3]	1xiodoTMT6plex [C3]			0.0123694	0	0.513	0	3	7		Q8LSM9; A0A118JW60; A0A2J6M866		0	2048.03	17
FALSE	High	Unambiguous	SSCNSASSWMNQELDATSQR	[R].SSCNSASSWMNQELDATSQR.[R]	1xiodoTMT6plex [C3]	1xiodoTMT6plex [C3]			0.000214877	0	1.172	1	1	1	731312849	731312849	731312849 [228-247]	0	2531.15	20	0.669	0.49	0.825	0.699	0.623	-0.58	-1.03	-0.28	-0.52	-0.68	139.4	93.2	68.3	114.9	97.4	86.9	376.4	251.7	184.4	310.4	263.1	234.6	270.7	141.4	123.8	162.7	263.1	143.1	1
FALSE	High	Unambiguous	LNPLVSTLSLYDLAGTPGVAADCSHVNTR	[K].LNPLVSTLSLYDLAGTPGVAADCSHVNTR.[A]	1xiodoTMT6plex [C23]	1xiodoTMT6plex [C23]			6.67894e-05	0	1.362	1	1	7	731329081	731329081	731329081 [59-87]	0	3313.74	29	0.779	0.843	1.057	0.729	1	-0.36	-0.25	0.08	-0.46	0	110.9	86.5	93.6	117.3	80.8	110.9	634.4	494.4	535.1	670.7	462.2	634.3	456.3	277.8	359.3	351.6	462.2	386.9	7
FALSE	High	Unambiguous	NADVADTSDLNYSNQAQQSVCFQPATAR	[K].NADVADTSDLNYSNQAQQSVCFQPATAR.[T]	1xiodoTMT6plex [C21]	1xiodoTMT6plex [C21]			3.23247e-05	0	1.48	1	1	1	1108800291	1108800291	1108800291 [623-650]	0	3343.58	28	0.504	1.058	1.024	1.14	0.747	-0.99	0.08	0.03	0.19	-0.42	109.6	55.2	116	112.3	124.9	81.9	82.3	41.5	87.1	84.3	93.8	61.5	59.2	23.3	58.5	44.2	93.8	37.5	1
FALSE	High	Unambiguous	TGTPAESYDDFLAVLPGNDCR	[K].TGTPAESYDDFLAVLPGNDCR.[Y]	1xiodoTMT6plex [C20]	1xiodoTMT6plex [C20]			0.000209655	0	1.176	1	1	1	731336429	731336429	731336429 [50-70]	0	2570.24	21	0.742	0.906	1.084	0.945	0.694	-0.43	-0.14	0.12	-0.08	-0.53	111.7	82.9	101.2	121.1	105.6	77.6	77.4	57.5	70.1	83.9	73.2	53.8	55.7	32.3	47.1	44	73.2	32.8	1
FALSE	High	Unambiguous	FVGPALPVDQSNYEEMADFCRR	[R].FVGPALPVDQSNYEEMADFCRR.[T]	1xiodoTMT6plex [C20]	1xiodoTMT6plex [C20]			0.179562	0.00596827	0.078	1	1	1	A0A251Q192	A0A251Q192	A0A251Q192 [466-487]	1	2873.39	22	1.054	1.323	1.549	0.694	1.526	0.08	0.4	0.63	-0.53	0.61	84	88.5	111.1	130.1	58.3	128.1	35.5	37.4	46.9	54.9	24.6	54.1	25.5	21	31.5	28.8	24.6	33	1
FALSE	High	Unambiguous	VGEPSESYEDFTASIPADECR	[K].VGEPSESYEDFTASIPADECR.[Y]	1xiodoTMT6plex [C20]	1xiodoTMT6plex [C20]			7.36958e-05	0	1.346	1	1	1	731318668	731318668	731318668 [46-66]	0	2631.21	21	0.352	0.484	0.872	0.909	0.526	-1.5	-1.05	-0.2	-0.14	-0.93	144.8	51	70.1	126.3	131.6	76.1	242.9	85.6	117.6	211.9	220.8	127.7	174.7	48.1	79	111.1	220.8	77.9	1
FALSE	High	Unambiguous	TGGPAESYDDFLASLPESDCR	[K].TGGPAESYDDFLASLPESDCR.[Y]	1xiodoTMT6plex [C20]	1xiodoTMT6plex [C20]			0.0534609	0	0.275	1	1	1	731320854	731320854	731320854 [50-70]	0	2559.19	21	0.786	0.951	1.159	1.038	0.716	-0.35	-0.07	0.21	0.05	-0.48	106.2	83.5	101	123.1	110.2	76	77.2	60.7	73.4	89.5	80.1	55.3	55.5	34.1	49.3	46.9	80.1	33.7	1
FALSE	High	Unambiguous	YGGASYEVSASPTGADVDSCR	[K].YGGASYEVSASPTGADVDSCR.[A]	1xiodoTMT6plex [C20]	1xiodoTMT6plex [C20]			0.00015995	0	1.22	1	1	1	731318172	731318172	731318172 [293-313]	0	2421.12	21	0.805	0.785	0.998	1.609	0.888	-0.31	-0.35	0	0.69	-0.17	98.6	79.4	77.4	98.4	158.6	87.6	299.5	241.2	235	298.9	481.8	266.1	215.4	135.5	157.8	156.7	481.8	162.3	1
FALSE	High	Unambiguous	YCGSAVWDIIR	[K].YCGSAVWDIIR.[G]	1xiodoTMT6plex [C2]	1xiodoTMT6plex [C2]			0.0356248	0	0.341	1	1	1	1108900526	1108900526	1108900526 [262-272]	0	1611.85	11	0.992	1.056	1.036	0.769	0.973	-0.01	0.08	0.05	-0.38	-0.04	103	102.1	108.8	106.7	79.2	100.2	142.7	141.5	150.7	147.8	109.7	138.9	102.6	79.5	101.2	77.5	109.7	84.7	1
FALSE	High	Unambiguous	NCLPDSVVVQR	[R].NCLPDSVVVQR.[IV]	1xiodoTMT6plex [C2]	1xiodoTMT6plex [C2]			0.0219153	0	0.42	1	4	1	A0A0J8C157	O81920; A0A176WN80; A0A0J8C157; A9TFW5	A0A0J8C157 [86-96]	0	1558.86	11	0.674	1.099	0.902	1.001	0.668	-0.57	0.14	-0.15	0	-0.58	112.3	75.7	123.4	101.3	112.4	75	549.9	370.6	604.3	496	550.6	367.1	395.5	208.2	405.8	260	550.6	223.9	1
FALSE	High	Unambiguous	ICPLNSGDNNLGPLDVR	[R].ICPLNSGDNNLGPLDVR.[S]	1xiodoTMT6plex [C2]	1xiodoTMT6plex [C2]			0.000475053	0	1.043	1	1	8	731344680	731344680	731344680 [229-245]	0	2126.12	17	1.1	1.222	1.301	1.371	1.511	0.14	0.29	0.38	0.46	0.6	79.9	88	97.7	104	109.6	120.8	1725.5	1898.8	2107.7	2244.4	2365.5	2607.6	1241	1066.9	1415.3	1176.6	2365.5	1590.5	8
FALSE	High	Unambiguous	YCDGASFAGEGQDEANQMFFR	[R].YCDGASFAGEGQDEANQMFFR.[G]	1xiodoTMT6plex [C2]	1xiodoTMT6plex [C2]			0.000255256	0	1.144	1	1	1	731327310	731327310	731327310 [98-118]	0	2672.17	21	0.857	0.957	0.969	0.89	1.101	-0.22	-0.06	-0.05	-0.17	0.14	103.9	89.1	99.4	100.7	92.5	114.4	191.6	164.3	183.3	185.6	170.5	211	137.8	92.3	123.1	97.3	170.5	128.7	1
FALSE	High	Unambiguous	TCPSQSEAWVR	[K].TCPSQSEAWVR.[Y]	1xiodoTMT6plex [C2]	1xiodoTMT6plex [C2]			0.0472734	0	0.295	1	2	1	731374388	731374388; A0A0J8B3K4	731374388 [105-115]	0	1592.81	11	0.815	0.919	0.729	1.555	0.924	-0.29	-0.12	-0.46	0.64	-0.11	101	82.3	92.8	73.6	157	93.3	920.4	750.4	845.6	671.3	1431.3	850.6	662	421.6	567.8	351.9	1431.3	518.8	1
FALSE	High	Unambiguous	TCPQLFPTIR	[K].TCPQLFPTIR.[A]	1xiodoTMT6plex [C2]	1xiodoTMT6plex [C2]			0.0447279	0	0.304	1	1	8	731316487	731316487	731316487 [35-44]	0	1504.85	10	1.331	1.436	0.461	0.304	0.912	0.41	0.52	-1.12	-1.72	-0.13	110.2	146.7	158.2	50.9	33.5	100.5	2606.6	3470.2	3742.6	1202.9	792.4	2377.4	1874.7	1949.8	2513.1	630.6	792.4	1450.1	8
FALSE	High	Unambiguous	ICGENAVMGLPETGLAIIPGAGGTQR	[R].ICGENAVMGLPETGLAIIPGAGGTQR.[L]	1xiodoTMT6plex [C2]	1xiodoTMT6plex [C2]			0.00209143	0	0.802	1	1	1	731332257	731332257	731332257 [159-184]	0	2854.51	26	1.149	1.141	1.207	0.684	1.179	0.2	0.19	0.27	-0.55	0.24	94.3	108.4	107.6	113.9	64.5	111.2	85.8	98.6	97.8	103.6	58.7	101.2	61.7	55.4	65.7	54.3	58.7	61.7	1
FALSE	High	Unambiguous	VCMLGDAQHVEEAER	[K].VCMLGDAQHVEEAER.[I]	1xiodoTMT6plex [C2]	1xiodoTMT6plex [C2]			0.00350593	0	0.718	1	12	1	A0A1W0W0J9	G5DX05; A0A0K9RX67; A0A0K9QA00; A0A1W0W0J9; A0A1D6N6M3; A0A1D6N6M5; A0A0K9QZP2; C4J929; Q677B5; G5DX04; 731349468; 731376993	A0A1W0W0J9 [157-171]	0	2015.98	15	0.798	1.028	1.019	1.17	0.898	-0.33	0.04	0.03	0.23	-0.16	101.5	81	104.3	103.4	118.7	91.1	189	150.7	194.2	192.5	221	169.7	135.9	84.7	130.4	100.9	221	103.5	1
FALSE	High	Unambiguous	TCAQDEVIR	[R].TCAQDEVIR.[IVA]	1xiodoTMT6plex [C2]	1xiodoTMT6plex [C2]			0.151157	0.00333266	0.106	1	131	4	731316328	A0A1U8NAL9; A0A2P5WJU0; I3SFV6; A0A2K1ZX06; A0A2C9V8L6; A0A2I4G4G9; A0A2H5NB04; A0A2P5EMY5; I1L5M4; G7JUL6; A0A1U8FJB9; A0A059DIU5; A0A067DUF1; A0A061DVE3; A0A151TWH5; B9HNR7; A0A0D2S336; A0A022PXF0; T2DQ10; I3S2Q6; A0A2K1ZX04; T2DNR6; A0A078GS81; G7JTL9; A0A2K3NCG4; A0A2P5Y8A9; A0A2P4LK78; R0I3C5; A0A2P5AHV5; A0A218W4S9; A0A2P5QQW5; B9H9U1; A0A1U8I0V3; A0A0B0NJ27; A0A2G3DGV8; A0A103XPZ0; A0A2P5D…	731316328 [118-126]	0	1363.72	9	1.082	1.336	1.391	1.813	1.6	0.11	0.42	0.48	0.86	0.68	73	79	97.5	101.5	132.3	116.7	203.6	220.3	271.9	283.1	369	325.6	146.4	123.8	182.6	148.4	369	198.6	2
FALSE	High	Unambiguous	YCAPDPEQDFSR	[RG].YCAPDPEQDFSR.[G]	1xiodoTMT6plex [C2]	1xiodoTMT6plex [C2]			0.0390676	0	0.326	1	51	2	731352092	A0A022RPP7; A0A2C9VA14; A0A1D1Y6P4; V7B6G2; S8D021; A0A067F9P8; I1L6Z9; A0A2G5D1P9; A0A0K9RMV9; V4L8R6; A0A1J7GKB5; I1L700; F4IMR9; A0A067JGF3; A5C8C9; M4FFM4; A0A2R6RRW2; I1N383; A0A087G484; A0A151RQC2; A0A0D3AHB8; A0A1U7ZGF1; A0A1J3J8U5; V4M896; A0A2C9VBR6; W9RG58; A0A078HJX0; A0A2H3Y289; V4T008; A0A1D1ZF66; A0A068UDN2; B8LPV3; A0A178VWV3; D7SQY6; M4EJF1; A0A2G9HV24; O22925; A0A1S2YUD3; I1L701;…	731352092 [268-279]	0	1756.82	12	0.755	0.873	0.85	0.797	0.873	-0.41	-0.2	-0.23	-0.33	-0.2	116.6	88	101.7	99.1	92.9	101.7	735.8	555.5	642.2	625.3	586.2	642.2	529.2	312.1	431.2	327.8	586.2	391.7	2
FALSE	High	Unambiguous	ICSYAQGMNILR	[K].ICSYAQGMNILR.[ATVSEI]	1xiodoTMT6plex [C2]	1xiodoTMT6plex [C2]			0.0148757	0	0.483	2	391	12	A0A2H5P1K5; 731332004	A0A2G9H6Z3; A0A2I0ATH4; A0A218VVQ8; B9VWD5; A0A022RJX5; A0A1U8NRN0; A0A2G2VKI7; W8NX13; B6TX10; H8ZVR8; A0A1S6KBS6; A0A1S3CBC8; A0A251LQ27; A0A1S6KBR5; D7KSU5; A0A2K3PH80; F8T8Z6; A0A0C9RJ42; A0A078HMH2; A0A2I0KCK3; A0A2P5B4W5; A0A1J3GKN0; Q9SH69; A0A1J3CTD8; F8T8Z8; A0A2P5DMV2; A0A2H3XTI5; A0A1S6KBP9; A0A1S6KBU3; I1N6I4; E3V1H9; A0A0A9N9Z2; A0A2P6P6F1; A0A0D3CN92; A0A1Q3CIX8; A0A1S6KBT0; F8T8Y4;…	A0A2H5P1K5 [383-394]; 731332004 [430-441]	0	1697.9	12	1.312	1.317	1.463	0.988	1.347	0.39	0.4	0.55	-0.02	0.43	80.8	106	106.4	118.2	79.8	108.8	993.3	1303	1307.8	1453	981.2	1338	714.4	732.1	878.2	761.7	981.2	816.1	3
FALSE	High	Unambiguous	TCLEVLGNSEVR	[K].TCLEVLGNSEVR.[T]	1xiodoTMT6plex [C2]	1xiodoTMT6plex [C2]			0.0125997	0	0.51	1	2	4	1108782925	A0A0J8BEJ9; 1108782925	1108782925 [111-122]	0	1648.89	12	1.214	1.387	1.124	1.217	1.258	0.28	0.47	0.17	0.28	0.33	83.3	101.2	115.6	93.6	101.4	104.8	1011	1227.3	1402	1135.9	1230.2	1271.6	727.1	689.6	941.4	595.5	1230.2	775.6	4
FALSE	High	Unambiguous	QCGFVQFTNR	[K].QCGFVQFTNR.[SG]	1xiodoTMT6plex [C2]	1xiodoTMT6plex [C2]			0.0593529	0.00054243	0.258	1	3	1	731369905	Q84LL7; A0A0K9QSW8; 731369905	731369905 [315-324]	0	1528.79	10	0.996	1.324	0.985	0.877	1.259	-0.01	0.41	-0.02	-0.19	0.33	93.1	92.7	123.3	91.8	81.7	117.3	195.9	195.1	259.4	193	171.8	246.7	140.9	109.6	174.2	101.2	171.8	150.5	1
FALSE	High	Unambiguous	ICGLPSTR	[R].ICGLPSTR.[H]	1xiodoTMT6plex [C2]	1xiodoTMT6plex [C2]			0.121136	0.00257247	0.142	1	1	7	731354496	731354496	731354496 [70-77]	0	1175.68	8	0.602	1.341	0.682	2.135	1.211	-0.73	0.42	-0.55	1.09	0.28	86.1	51.8	115.4	58.7	183.7	104.2	4404.3	2651.2	5908.1	3004.3	9403	5333.7	3167.7	1489.6	3967.2	1575	9403	3253.3	7
FALSE	High	Unambiguous	ICNLIQSGVESGAR	[R].ICNLIQSGVESGAR.[L]	1xiodoTMT6plex [C2]	1xiodoTMT6plex [C2]			0.00765621	0	0.591	1	2	1	731359747	A0A2P6PQL0; 731359747	731359747 [367-380]	0	1775.96	14	1.302	1.307	1.329	0.782	1.385	0.38	0.39	0.41	-0.35	0.47	84.4	110	110.4	112.2	66	117	296.7	386.4	387.9	394.3	232.1	411	213.4	217.1	260.5	206.7	232.1	250.7	1
FALSE	High	Unambiguous	QCPAGNAGANIVVPMDPISPTISDTAYYR	[R].QCPAGNAGANIVVPMDPISPTISDTAYYR.[N]	1xiodoTMT6plex [C2]	1xiodoTMT6plex [C2]			4.88078e-05	0	1.413	1	2	1	A0A0J8CS88	A0A0J8CS88; 731321372	A0A0J8CS88 [239-267]	0	3350.67	29	0.716	0.823	0.957	0.623	1.205	-0.48	-0.28	-0.06	-0.68	0.27	112.7	80.7	92.8	107.9	70.2	135.8	180.8	129.4	148.8	173	112.6	217.9	130	72.7	99.9	90.7	112.6	132.9	1
FALSE	High	Unambiguous	VCQVIGAVVDVR	[KR].VCQVIGAVVDVR.[F]	1xiodoTMT6plex [C2]	1xiodoTMT6plex [C2]			0.0145142	0	0.487	3	47	7	A0A2P4LXF3; M0UCJ4; 731341013	A0A2N9FMY0; O82722; A0A2G3CFH8; A0A1U8FHC9; A0A2P4LXF3; A0A2I0XEZ3; A0A0V0IJL8; A0A1J6K2R3; A0A1U8F1W2; A0A1U7Z806; A0A1S4CK04; A0A1U7W1V5; A0A2I0VXW6; M0UCJ4; W8SRJ3; A0A1D1Y276; S8DTS7; A0A2R6QQP9; O82721; A0A2R6RKT4; M0SIS6; A0A2I0B6S3; S8C857; K4BX20; B9FLI4; A0A2G2VK08; A0A2R6P3X5; M1A5X1; A0A022RK32; 731341013; P17614; M1D096; A0A1U7ZWC8; A0A1S4A1J2; A0A2C9UKP7; A0A2R6P9T9; W1PDB9; A0A251PF…	A0A2P4LXF3 [86-97]; [312-323]; M0UCJ4 [88-99]; 731341013 [85-96]	0	1586.92	12	0.898	1.019	1.004	0.818	0.913	-0.16	0.03	0.01	-0.29	-0.13	106.2	95.3	108.2	106.6	86.8	96.9	1877.4	1685.1	1913.7	1884.4	1535.8	1714.1	1350.3	946.8	1285	987.9	1535.8	1045.5	7
FALSE	High	Unambiguous	VCTPYLPESVSGGTPAANER	[R].VCTPYLPESVSGGTPAANER.[V]	1xiodoTMT6plex [C2]	1xiodoTMT6plex [C2]			0.000235642	0	1.157	1	1	1	731342889	731342889	731342889 [143-162]	0	2377.2	20	0.785	0.939	0.927	0.632	0.997	-0.35	-0.09	-0.11	-0.66	0	113.6	89.2	106.7	105.3	71.8	113.3	236.8	186	222.3	219.6	149.7	236.1	170.3	104.5	149.3	115.1	149.7	144	1
FALSE	High	Unambiguous	TGQALVFGIYDEPVAPGQCNMVVER	[K].TGQALVFGIYDEPVAPGQCNMVVER.[L]	1xiodoTMT6plex [C19]	1xiodoTMT6plex [C19]			0.00256203	0	0.769	1	1	1	731354018	731354018	731354018 [99-123]	0	3022.53	25	1.794	1.804	1.57	0.896	1.172	0.84	0.85	0.65	-0.16	0.23	72.9	130.7	131.4	114.4	65.3	85.4	122.4	219.4	220.7	192.1	109.6	143.5	88	123.3	148.2	100.7	109.6	87.5	1
FALSE	High	Unambiguous	IPLFSAAGLPHNEIAAQICR	[K].IPLFSAAGLPHNEIAAQICR.[Q]	1xiodoTMT6plex [C19]	1xiodoTMT6plex [C19]			0.000963612	0	0.928	1	253	2	A0A1S3V652	A0A2H3XED9; A0A1U8AVD4; A0A1U8JD49; A0A1U8L4B6; A0A2G5C2R1; V4S5X8; A0A1U8PBX6; A0A1J6IVM9; M1CJD7; A0A1S3TW21; A0A0D6R2M7; A0A151RA52; Q40078; A0A078GXM7; A0A0K9PFW2; A0A2R6QQC3; A0A287X6Z4; A0A0V0IKS8; A0A022RJ66; A0A1E5WD61; M8CUW7; A0A2H3Z521; A0A1D6C4H7; A0A1S2XQE2; A0A068V209; A0A2P2MTW6; A0A1J3H7V9; A0A0E0C6N9; A0A061G2M5; W1NPH5; A0A161ZT90; A0A0D2P0L2; A0A0E0LCT3; V4KCP6; A0A1S3ZN23; A0A…	A0A1S3V652 [163-182]	0	2450.35	20	0.36	0.358	0.502	0.577	0.505	-1.47	-1.48	-1	-0.79	-0.99	181.7	65.5	65.1	91.1	104.8	91.8	411.8	148.4	147.6	206.6	237.6	208.1	296.2	83.4	99.1	108.3	237.6	126.9	1
FALSE	High	Unambiguous	TGQALVIGLYDEPVTPGQCNMIVER	[K].TGQALVIGLYDEPVTPGQCNMIVER.[L]	1xiodoTMT6plex [C19]	1xiodoTMT6plex [C19]			5.72709e-05	0	1.387	1	2	7	731317399	731317401; 731317399	731317399 [99-123]	0	3032.57	25	1.096	1.072	1.33	0.825	0.814	0.13	0.1	0.41	-0.28	-0.3	97.8	107.2	104.8	130	80.6	79.6	1722	1887.3	1846.3	2289.6	1420	1401.8	1238.5	1060.4	1239.8	1200.3	1420	855	7
FALSE	High	Rejected	IRRDVSQDGNHGLDIFVCGDQIR	[R].IRRDVSQDGNHGLDIFVCGDQIR.[K]	1xiodoTMT6plex [C18]	1xiodoTMT6plex [C18]			0.0890687	0.000962316	0.192	0	1	1		A0A2P2LQI2		2	2942.52	23
FALSE	High	Selected	IRQDLSQEGNHGLDIFVCGDQIR	[R].IRQDLSQEGNHGLDIFVCGDQIR.[K]	1xiodoTMT6plex [C18]	1xiodoTMT6plex [C18]			0.0324854	0	0.356	1	1	1	A0A2I0XB93	A0A2I0XB93	A0A2I0XB93 [344-366]	1	2942.51	23	1.365	1.279	1.226	0.834	1.075	0.45	0.36	0.29	-0.26	0.1	88.5	120.8	113.2	108.5	73.8	95.1	298.5	407.6	381.8	365.9	249	320.8	214.7	229	256.4	191.8	249	195.7	1
FALSE	High	Unambiguous	HNNYLESTGIFVNEGSPCA	[R].HNNYLESTGIFVNEGSPCA.[-]	1xiodoTMT6plex [C18]	1xiodoTMT6plex [C18]			0.0186768	0	0.446	1	1	1	731337645	731337645	731337645 [148-166]	0	2381.14	19	1.301	1.294	1.692	0.876	0.974	0.38	0.37	0.76	-0.19	-0.04	84.1	109.4	108.8	142.3	73.6	81.9	426.7	555.1	552.1	722.2	373.6	415.8	306.9	311.9	370.7	378.6	373.6	253.6	1
FALSE	High	Unambiguous	VAEIMIHNPGVEEDPACGPLIDSVAMR	[K].VAEIMIHNPGVEEDPACGPLIDSVAMR.[V]	1xiodoTMT6plex [C17]	1xiodoTMT6plex [C17]			0.000826282	0	0.953	1	1	1	731320229	731320229	731320229 [157-183]	0	3192.61	27	0.588	1.37	1.57	5.02	0.848	-0.77	0.45	0.65	2.33	-0.24	57.7	33.9	79.1	90.6	289.7	48.9	251.2	147.7	344.2	394.5	1261.2	213	180.7	83	231.1	206.8	1261.2	129.9	1
FALSE	High	Unambiguous	VSGVGDVEGSADAAAYCSIR	[R].VSGVGDVEGSADAAAYCSIR.[L]	1xiodoTMT6plex [C17]	1xiodoTMT6plex [C17]			0.000884115	0	0.942	1	1	1	731317968	731317968	731317968 [121-140]	0	2256.11	20	0.92	1.026	1.306	0.673	0.918	-0.12	0.04	0.39	-0.57	-0.12	102.7	94.5	105.3	134.1	69.1	94.3	211.3	194.5	216.8	276	142.3	194.1	152	109.3	145.6	144.7	142.3	118.4	1
FALSE	High	Unambiguous	FSYGEPMNVESTTQALCDLALR	[R].FSYGEPMNVESTTQALCDLALR.[F]	1xiodoTMT6plex [C17]	1xiodoTMT6plex [C17]			0.000128973	0	1.255	1	1	5	731361751	731361751	731361751 [101-122]	0	2774.37	22	0.585	0.781	0.952	0.961	0.892	-0.77	-0.36	-0.07	-0.06	-0.17	116	67.9	90.7	110.5	111.4	103.5	1564.9	916.2	1223	1490.3	1503.2	1395.5	1125.5	514.8	821.2	781.3	1503.2	851.2	5
FALSE	High	Unambiguous	FSYGEPMTVESTTQALCDLALR	[RK].FSYGEPMTVESTTQALCDLALR.[F]	1xiodoTMT6plex [C17]	1xiodoTMT6plex [C17]			2.91158e-05	0	1.497	1	169	6	731363918	A0A2N9EJI8; A0A2P5SMU9; A0A2P5FA57; A0A2H5Q6S0; A0A1U7XDB3; A0A0E0MH82; A0A0K9RE77; A0A0B2PLZ1; A0A067ESA1; A0A1S4B9N4; A0A2J6LQB8; A0A2P5Y2H0; F6HXL1; N1QY18; A0A200PZQ8; A0A0E0MH81; M4FHI3; A0A199VY06; V7BJF9; A0A2G5CQI5; A0A067L805; A0A2R6PT36; A0A2I4GBJ4; A0A2K2BYP5; A0A2P6Q782; A0A022S3P6; I3SRR7; A0A2G3ANC7; A0A2K3MSR6; A0A251U0T5; A0A2C9UYJ5; C6TGU2; A0A1D5YTY9; A0A2G2XDT8; I1IIA6; A0A1U8B…	731363918 [101-122]	0	2761.37	22	0.755	0.803	0.986	0.732	0.914	-0.4	-0.32	-0.02	-0.45	-0.13	115.6	87.3	92.8	114	84.6	105.7	595.6	449.9	478.3	587.3	435.9	544.5	428.4	252.8	321.2	307.9	435.9	332.1	3
FALSE	High	Unambiguous	FGEQAMVDAGNEAEGCR	[K].FGEQAMVDAGNEAEGCR.[M]	1xiodoTMT6plex [C16]	1xiodoTMT6plex [C16]			0.00106326	0	0.912	1	1	1	731348205	731348205	731348205 [134-150]	0	2112.96	17	1.081	0.719	1.383	1.279	0.975	0.11	-0.48	0.47	0.35	-0.04	93.2	100.8	67	129	119.2	90.9	566.3	612.1	407.2	783.4	724.1	552	407.3	343.9	273.4	410.7	724.1	336.7	1
FALSE	High	Unambiguous	QLGTPWADGTASISQCPINPGETFTYR	[R].QLGTPWADGTASISQCPINPGETFTYR.[F]	1xiodoTMT6plex [C16]	1xiodoTMT6plex [C16]			0.0400406	0	0.322	1	2	1	731355863	A0A0J8EGV0; 731355863	731355863 [101-127]	0	3239.6	27	2.538	2.862	1.23	5.283	3.578	1.34	1.52	0.3	2.4	1.84	36.4	92.3	104.1	44.8	192.2	130.2	8.1	20.5	23.1	9.9	42.6	28.9	5.8	11.5	15.5	5.2	42.6	17.6	1
FALSE	High	Unambiguous	LSPVEMESAGVALICHQQR	[K].LSPVEMESAGVALICHQQR.[V]	1xiodoTMT6plex [C15]	1xiodoTMT6plex [C15]			0.00144606	0	0.862	1	3	1	731317224	731317222; 731317224; 731317220	731317224 [278-296]	0	2397.26	19	0.471	0.462	0.501	0.525	0.767	-1.09	-1.11	-1	-0.93	-0.38	161.1	75.8	74.4	80.7	84.6	123.5	367.2	172.8	169.6	183.9	192.8	281.7	264.1	97.1	113.9	96.4	192.8	171.8	1
FALSE	High	Unambiguous	VESALVSIGDGVTLCR	[R].VESALVSIGDGVTLCR.[R]	1xiodoTMT6plex [C15]	1xiodoTMT6plex [C15]			0.00839612	0	0.576	1	1	1	731316647	731316647	731316647 [284-299]	0	1948.07	16	0.909	0.926	0.98	1.079	1.394	-0.14	-0.11	-0.03	0.11	0.48	95.4	86.7	88.4	93.5	102.9	133	254.7	231.5	235.9	249.7	274.8	355.1	183.2	130.1	158.4	130.9	274.8	216.6	1
FALSE	High	Unambiguous	YYGGNEHIDVIENLCR	[R].YYGGNEHIDVIENLCR.[S]	1xiodoTMT6plex [C15]	1xiodoTMT6plex [C15]			0.0220505	0	0.419	1	4	1	731325199	A0A1Z4EAY0; A0A0J8FG73; A0A0K9RCF9; 731325199	731325199 [132-147]	0	2224.1	16	0.66	0.824	0.874	1.014	0.933	-0.6	-0.28	-0.19	0.02	-0.1	113.1	74.7	93.2	98.8	114.7	105.5	481.8	318	396.9	421	488.7	449.5	346.5	178.7	266.5	220.7	488.7	274.2	1
FALSE	High	Unambiguous	HTPGTFTNQLQTSFCEPR	[R].HTPGTFTNQLQTSFCEPR.[L]	1xiodoTMT6plex [C15]	1xiodoTMT6plex [C15]			0.01926	0	0.441	1	7	3	731317706	731317706; A0A0C9RIM9; A0A0K9RT87; A0A0K9Q721; A0A0D6QYG9; A0A0K9S0H0; A0A199VWI1	731317706 [102-119]	0	2393.19	18	1.049	1.218	1.174	0.805	1.109	0.07	0.28	0.23	-0.31	0.15	94.4	99	115	110.9	76	104.7	1120	1174.7	1364.4	1315.2	901.1	1241.7	805.5	660	916.2	689.5	901.1	757.4	3
FALSE	High	Unambiguous	IESSLLSIGDGITLCR	[R].IESSLLSIGDGITLCR.[R]	1xiodoTMT6plex [C15]	1xiodoTMT6plex [C15]			0.0252452	0	0.397	1	6	6	A0A2P4NB14	A0A2P4NAT3; A0A1R3J060; A0A2P4NB14; 731343221; A0A0K9QF85; A0A1R3J017	A0A2P4NB14 [426-441]	0	2006.12	16	1.137	0.936	0.926	0.635	1.341	0.19	-0.1	-0.11	-0.66	0.42	100.4	114.2	94	93	63.7	134.7	365.9	416.1	342.5	339	232.3	490.9	263.2	233.8	230	177.7	232.3	299.4	2
FALSE	High	Unambiguous	TTTGSYTSSLPSNLCR	[K].TTTGSYTSSLPSNLCR.[H]	1xiodoTMT6plex [C15]	1xiodoTMT6plex [C15]			0.211997	0.00795661	0.051	1	1	1	731344501	731344501	731344501 [498-513]	0	2017.02	16	1.352	1.26	1.271	1.042	1.2	0.44	0.33	0.35	0.06	0.26	84.2	113.9	106.1	107	87.8	101	321.6	434.8	405.2	408.6	335.1	385.8	231.3	244.3	272.1	214.2	335.1	235.3	1
FALSE	High	Unambiguous	YTQGFSGADITEICQR	[KR].YTQGFSGADITEICQR.[AST]	1xiodoTMT6plex [C14]	1xiodoTMT6plex [C14]			0.000670372	0	0.987	2	253	2	A0A2H5Q625; A0A1S2XEL7	A0A1U7XIL8; A0A067EYL4; B9S0I1; A0A1S3ZVE8; V7D3U9; A0A2P5W8V3; A0A1U7XLI7; A0A0D2U360; A0A1J6JM35; A0A2G5C614; A0A2H5Q625; M4EZ46; A0A2I0VQC0; A0A176WK41; A0A1U8IS21; A0A1X9RU24; A0A1S4CL01; A0A200Q9B5; C4J0Z7; A0A0D2SWV1; F6GWA3; A0A2P5CH00; 731351877; A0A1D5S5V4; A0A0A7A593; Q9LZF6; A0A078FE76; A0A1J6JQY1; C0PBG2; V4LCV7; A0A287PL99; F2E3Y2; A0A1D5Y3Q3; A0A1D5XYT4; A0A0D2MBS1; A0A2R6PEX0; A0A2…	A0A2H5Q625 [694-709]; A0A1S2XEL7 [681-696]	0	2118.05	16	0.97	1.142	0.729	0.815	0.859	-0.04	0.19	-0.46	-0.29	-0.22	108.8	105.5	124.2	79.3	88.7	93.4	1201.6	1165.4	1371.9	876.3	979.6	1031.7	864.2	654.8	921.2	459.4	979.6	629.3	2
FALSE	High	Unambiguous	VATAISNFEPVTVCASPTQWSNAR	[K].VATAISNFEPVTVCASPTQWSNAR.[N]	1xiodoTMT6plex [C14]	1xiodoTMT6plex [C14]			0.000975538	0	0.926	1	1	2	A0A0J8CFT9	A0A0J8CFT9	A0A0J8CFT9 [49-72]	0	2878.47	24	1.333	1.789	0.936	1.441	1.778	0.41	0.84	-0.1	0.53	0.83	72.5	96.7	129.7	67.8	104.5	128.9	568.8	758.4	1017.4	532.2	819.6	1011.4	409.1	426.1	683.2	279	819.6	616.9	2
FALSE	High	Unambiguous	GLSPLPGSNNESWCQGLDGLASR	[K].GLSPLPGSNNESWCQGLDGLASR.[SC]	1xiodoTMT6plex [C14]	1xiodoTMT6plex [C14]			0.00080126	0	0.958	2	4	1	731345174; A0A1L1YPK5	A0A068TWW6; 731345174; A0A1L1YPK5; A0A1I9J7R1	731345174 [153-175]; A0A1L1YPK5 [92-114]	0	2687.34	23	0.672	0.627	0.708	0.558	0.913	-0.57	-0.67	-0.5	-0.84	-0.13	134	90	84	94.9	74.8	122.3	611.2	410.6	383.3	433	341.3	557.8	439.6	230.7	257.4	227	341.3	340.2	1
FALSE	High	Unambiguous	IAAVQALSGTGACR	[RK].IAAVQALSGTGACR.[LVM]	1xiodoTMT6plex [C13]	1xiodoTMT6plex [C13]			0.00116601	0	0.897	1	112	4	A0A2P5X5J0	B8B3J3; A0A1D6H679; A0A287X907; Q42803; A0A2P5X5J0; A0A0D2RUW3; A0A0D2SPS4; A0A1U8LW26; A0A1U8HXN2; M5WTW5; A0A1D6H681; A0A194YNT9; A0A161YEP9; A0A199W7K3; A0A1S3VKA9; W5I3E6; A0A2G9GJP9; Q43305; A0A2G5CSY6; A0A1S2YIY6; A0A0R0JTF7; A0A1D6CD35; A0A0D9WR26; A0A2G5CRS0; J3LB75; A0A2P5S597; A5C4K0; A0A0D9YPS2; K3XX32; A0A287T604; Q6EUS6; Q9ZTX1; I1Q2X9; A0A1D6AW90; A0A0E0G430; J3MEV7; A0A1D1XUN7; F2D…	A0A2P5X5J0 [267-280]	0	1646.92	14	1.204	1.204	1.197	0.937	1.237	0.27	0.27	0.26	-0.09	0.31	88.5	106.6	106.6	105.9	83	109.5	2838.3	3417.4	3417.2	3397.3	2660.8	3511.1	2041.4	1920.1	2294.6	1781	2660.8	2141.6	4
FALSE	High	Unambiguous	TLVSAAMTDQETCLDGFSHNRADR	[K].TLVSAAMTDQETCLDGFSHNRADR.[H]	1xiodoTMT6plex [C13]	1xiodoTMT6plex [C13]			0.165765	0.00487918	0.091	1	1	1	731347886	731347886	731347886 [178-201]	1	2967.43	24	1.183	1.284	1.487	1.454	1.517	0.24	0.36	0.57	0.54	0.6	75.7	89.5	97.2	112.6	110.1	114.9	317.4	375.4	407.5	471.9	461.5	481.5	228.3	210.9	273.6	247.4	461.5	293.7	1
FALSE	High	Unambiguous	TLVSAAMTDQETCLDGFSHNR	[K].TLVSAAMTDQETCLDGFSHNR.[A]	1xiodoTMT6plex [C13]	1xiodoTMT6plex [C13]			0.00437479	0	0.682	1	1	2	731347886	731347886	731347886 [178-198]	0	2625.26	21	0.605	0.73	0.677	1.523	0.701	-0.73	-0.45	-0.56	0.61	-0.51	114.6	69.3	83.6	77.6	174.5	80.4	651.4	394	475.4	441.2	992.4	456.9	468.5	221.4	319.2	231.3	992.4	278.7	2
FALSE	High	Unambiguous	EAALGNIPTIAFCDTDSPMR	[KR].EAALGNIPTIAFCDTDSPMR.[FYH]	1xiodoTMT6plex [C13]	1xiodoTMT6plex [C13]			0.0347591	0	0.345	2	142	1	A0A0D9X1I2; 731317706	A0A2I0WG81; A0A151SHX2; A0A1R3H6S3; A0A2P2K581; A0A2G2WM66; A0A0R0IZE4; A0A2R6PT00; A0A0A0K8X1; A0A1J7HDL8; A0A2I4G5R8; A0A0D2UGE0; A0A2G3AW33; 731347955; A0A0D9X1I2; A0A2N9EXJ1; A0A2R6PV46; A0A2K3JL02; V4SM89; A0A1R3HJW3; O80377; A0A218W701; A0A1U8PQM6; A0A2G3C9Z9; A0A251N2F5; A0A2K1XLJ4; A0A1S3VA58; A0A2P4IPM5; A0A124SDS8; A0A200PUT7; B7FID3; A0A1Q3B069; A0A2R6QFG0; A0A1U8IJU8; A0A2I4G7N3; G3BG…	A0A0D9X1I2 [140-159]; 731317706 [135-154]	0	2451.22	20	0.367	0.437	0.577	0.569	0.515	-1.44	-1.2	-0.79	-0.81	-0.96	173.2	63.6	75.6	99.9	98.5	89.2	205.4	75.5	89.7	118.5	116.8	105.7	147.7	42.4	60.2	62.1	116.8	64.5	1
FALSE	High	Unambiguous	EEEKVDYFNLPCPIPYEEIHR	[K].EEEKVDYFNLPCPIPYEEIHR.[E]	1xiodoTMT6plex [C12]	1xiodoTMT6plex [C12]			0.12882	0.00257247	0.132	1	1	1	A0A2N9HVW5	A0A2N9HVW5	A0A2N9HVW5 [21-41]	1	2949.47	21	0.973	0.848	1.635	0.702	1.434	-0.04	-0.24	0.71	-0.51	0.52	91	88.5	77.2	148.8	63.9	130.5	17.4	16.9	14.7	28.4	12.2	24.9	12.5	9.5	9.9	14.9	12.2	15.2	1
FALSE	High	Unambiguous	IWQGSEDGNYDCR	[R].IWQGSEDGNYDCR.[H]	1xiodoTMT6plex [C12]	1xiodoTMT6plex [C12]			0.00159559	0	0.846	1	3	2	A0A2C9UDZ8	731320676; A0A1Q3D7C9; A0A2C9UDZ8	A0A2C9UDZ8 [292-304]	0	1871.85	13	0.912	1.198	1.178	0.982	1.618	-0.13	0.26	0.24	-0.03	0.69	87.1	79.4	104.3	102.6	85.5	141	933.5	851.3	1118.4	1099.9	916.9	1510.8	671.4	478.3	751	576.6	916.9	921.5	2
FALSE	High	Unambiguous	VRHAGNPNVMVCER	[K].VRHAGNPNVMVCER.[G]	1xiodoTMT6plex [C12]	1xiodoTMT6plex [C12]			0.0490504	0	0.289	1	1	8	A0A061RA01	A0A061RA01	A0A061RA01 [159-172]	1	1911	14	1.608	1.347	1.399	0.895	0.818	0.69	0.43	0.48	-0.16	-0.29	84.9	136.5	114.3	118.7	76	69.5	5522.9	8882.7	7439	7723.9	4945.4	4519.4	3972.2	4990.9	4995.2	4049.2	4945.4	2756.6	8
FALSE	High	Unambiguous	IFNSDGSEPEMCGNGVR	[RK].IFNSDGSEPEMCGNGVR.[C]	1xiodoTMT6plex [C12]	1xiodoTMT6plex [C12]			0.00151898	0	0.854	1	126	2	A0A2G5D629	I1NA10; A0A061ESI3; B4FVI8; A0A1R3HR77; A0A2P6RA96; A0A1Q3B3X3; I3S5C7; A0A0D2QXF1; F6HQY5; A0A1R3JQQ2; A0A067DYN2; A0A1J3GYG2; A0A1J3F672; A0A2I0A8R1; I1IHA9; A0A199W221; A0A1S3BHL3; A0A1S2XPI4; A0A0D3BR82; C6T990; A0A1U8NM86; A0A059A6C8; A0A072U2R2; A0A1B6PDF1; A0A0E0BU76; B4F833; A0A2H5NYH8; A0A1D1Z093; A0A1U8A5A9; A0A2G5D655; A0A2R6PWV6; V4SNK7; M7ZST9; A0A1J3D5T3; B4FQ56; V4L478; A0A0L9U8W2;…	A0A2G5D629 [186-202]	0	2141	17	1.14	1.951	1.462	1.122	0.99	0.19	0.96	0.55	0.17	-0.02	78.3	89.3	152.7	114.4	87.8	77.5	851.1	970.5	1660	1243.9	954.5	842.2	612.1	545.3	1114.7	652.1	954.5	513.7	2
FALSE	High	Unambiguous	VATPEQAQEVHCELR	[K].VATPEQAQEVHCELR.[K]	1xiodoTMT6plex [C12]	1xiodoTMT6plex [C12]			0.00037605	0	1.081	1	1	9	731315260	731315260	731315260 [176-190]	0	2039.05	15	1.345	1.098	1	1.091	0.808	0.43	0.14	0	0.13	-0.31	94.6	127.3	103.9	94.6	103.2	76.4	6651.6	8948.2	7304.7	6649.6	7253.7	5374.1	4784	5027.7	4905	3486	7253.7	3277.9	9
FALSE	High	Unambiguous	NSAPLISMINTCFQQDGR	[K].NSAPLISMINTCFQQDGR.[R]	1xiodoTMT6plex [C12]	1xiodoTMT6plex [C12]			0.000981556	0	0.925	1	1	1	A0A0J8B2Q3	A0A0J8B2Q3	A0A0J8B2Q3 [300-317]	0	2324.17	18	0.769	0.773	0.833	1.311	0.861	-0.38	-0.37	-0.26	0.39	-0.22	108.2	83.2	83.6	90.1	141.8	93.2	337.7	259.7	261.1	281.2	442.6	290.8	242.9	145.9	175.3	147.4	442.6	177.4	1
FALSE	High	Unambiguous	TEQVVDYSNLPCPLPYEEIHR	[K].TEQVVDYSNLPCPLPYEEIHR.[E]	1xiodoTMT6plex [C12]	1xiodoTMT6plex [C12]			0.00539225	0	0.648	1	1	3	731347824	731347824	731347824 [21-41]	0	2831.42	21	0.52	0.664	0.638	0.732	0.516	-0.94	-0.59	-0.65	-0.45	-0.95	147.4	76.7	97.9	94	107.9	76.1	1012.8	526.6	672.2	645.9	741.1	522.5	728.4	295.9	451.4	338.6	741.1	318.7	3
FALSE	High	Unambiguous	YSNSDAVVYVGCGER	[K].YSNSDAVVYVGCGER.[G]	1xiodoTMT6plex [C12]	1xiodoTMT6plex [C12]			0.00177144	0	0.829	1	49	2	Q39442	O04054; A0A151SGF9; R0GDS5; A0A061G8X4; A0A2P5W5A3; Q39291; M4CHF0; G5DXS6; V4M7X4; A0A061GGY0; D7EYG6; A0A061GA72; A0A0S3T1C2; P13548; A0A1U8L944; I3NVX2; A0A0D2QE69; I1KG34; A0A1J3JVF0; M4F1X7; A0A1J7HTB3; Q4TUS1; A0A1S3VDJ9; A0A1J3GUP2; I1KVU0; P31405; Q9AVU8; A0A0D2TNU7; M4CVY8; Q39442; A0A1R3I0G6; Q42477; A0A0D9VCT6; A0A0K9RJR4; A0A0D3ARK5; A0A0D2T020; B9DHY6; A0A2P5R881; D7KVW2; A0A0D2UKJ6;…	Q39442 [268-282]	0	1947.94	15	0.531	0.727	0.703	0.993	0.609	-0.91	-0.46	-0.51	-0.01	-0.72	131.5	69.8	95.6	92.5	130.6	80.1	1060.3	562.8	770.5	745.6	1052.6	645.6	762.6	316.2	517.4	390.9	1052.6	393.8	2
FALSE	High	Unambiguous	VIDNFEYSAINCR	[R].VIDNFEYSAINCR.[S]	1xiodoTMT6plex [C12]	1xiodoTMT6plex [C12]			0.00459542	0	0.674	1	1	2	731330989	731330989	731330989 [42-54]	0	1872.95	13	0.795	0.761	0.956	1.582	0.739	-0.33	-0.39	-0.07	0.66	-0.44	102.9	81.8	78.2	98.3	162.8	76	1062	844.3	807.8	1015	1680.3	784.5	763.8	474.4	542.4	532.1	1680.3	478.5	2
FALSE	High	Unambiguous	TYFSATSAHTCTGDGNAMVAR	[R].TYFSATSAHTCTGDGNAMVAR.[A]	1xiodoTMT6plex [C11]	1xiodoTMT6plex [C11]			0.00205319	0	0.805	1	28	1	731337301	A0A0D2TYL9; A0A2K1ZNA2; A0A2K1ZNA1; A0A199VUR0; A0A0D2T1P6; A0A2K1ZNA5; A0A2P5ST36; D7SPF1; A0A118K1J8; A0A2K1ZN98; A0A2P5X9V8; V7CCV5; A0A1D1Y6I3; A0A1U8Q7K8; A0A2I4F485; S8EAY5; A0A1U7ZS49; A0A218WQ13; B9HEW3; A0A2I0ITU9; A5BGN3; A0A1U8AAB2; A0A1U8A8K2; A0A068U1I2; A0A1U8MY55; 731337301; A0A0D2PQ28; M0TBV9	731337301 [252-272]	0	2490.17	21	0.712	0.693	0.771	0.773	0.873	-0.49	-0.53	-0.37	-0.37	-0.2	124.4	88.6	86.2	96	96.2	108.6	687.3	489.6	476	530.1	531.6	599.9	494.3	275.1	319.6	277.9	531.6	365.9	1
FALSE	High	Unambiguous	VDLNVPLDDNCNITDDTRIR	[R].VDLNVPLDDNCNITDDTRIR.[A]	1xiodoTMT6plex [C11]	1xiodoTMT6plex [C11]			0.043641	0	0.308	1	2	1	731318922	731318922; A0A0K9S0R0	731318922 [24-43]	1	2630.34	20	1.781	1.693	3.827	1.171	2.786	0.83	0.76	1.94	0.23	1.48	48.9	87.2	82.9	187.3	57.3	136.4	163.4	291	276.5	625.3	191.3	455.1	117.5	163.5	185.7	327.8	191.3	277.6	1
FALSE	High	Unambiguous	LLLVTLGDQGCR	[K].LLLVTLGDQGCR.[Y]	1xiodoTMT6plex [C11]	1xiodoTMT6plex [C11]			0.00865831	0	0.571	1	2	1	731323052	Q42645; 731323052	731323052 [233-244]	0	1616.94	12	0.66	0.681	0.496	0.511	0.853	-0.6	-0.56	-1.01	-0.97	-0.23	142.8	94.3	97.2	70.8	72.9	121.9	583.1	385.1	396.9	289.2	297.8	497.6	419.4	216.4	266.5	151.6	297.8	303.5	1
FALSE	High	Unambiguous	VSNAEFGVDPCR	[R].VSNAEFGVDPCR.[G]	1xiodoTMT6plex [C11]	1xiodoTMT6plex [C11]			0.0918502	0.00187066	0.187	1	3	1	731325239	731325243; A0A0J8FG96; 731325239	731325239 [856-867]	0	1622.82	12	1.21	0.918	1.081	1.005	1.035	0.28	-0.12	0.11	0.01	0.05	96	116.2	88.1	103.8	96.5	99.4	439.6	532	403.4	475.4	441.7	455.1	316.2	298.9	270.9	249.2	441.7	277.6	1
FALSE	High	Unambiguous	VDLNVPLDDNCNITDDTR	[R].VDLNVPLDDNCNITDDTR.[I]	1xiodoTMT6plex [C11]	1xiodoTMT6plex [C11]			0.0112794	0	0.528	1	2	4	731318922	731318922; A0A0K9S0R0	731318922 [24-41]	0	2361.16	18	0.561	0.545	0.885	0.898	0.584	-0.83	-0.88	-0.18	-0.16	-0.78	134.2	75.3	73.1	118.7	120.4	78.3	1622	910.7	883.3	1435.2	1456.2	947	1166.6	511.7	593.1	752.4	1456.2	577.6	4
FALSE	High	Unambiguous	NSPYGLSDTECQLPER	[R].NSPYGLSDTECQLPER.[C]	1xiodoTMT6plex [C11]	1xiodoTMT6plex [C11]			0.000395015	0	1.073	1	2	5	1108912345	Q39436; 1108912345	1108912345 [338-353]	0	2138.04	16	0.551	0.673	1.477	2.053	1.397	-0.86	-0.57	0.56	1.04	0.48	83.9	46.3	56.5	123.9	172.2	117.2	1701.4	937.9	1145.7	2512.2	3492.7	2376.3	1223.7	527	769.3	1317	3492.7	1449.4	5
FALSE	High	Unambiguous	LGPFMQVLPICSR	[K].LGPFMQVLPICSR.[L]	1xiodoTMT6plex [C11]	1xiodoTMT6plex [C11]			0.0299893	0	0.369	1	102	3	B9T0N9	A0A0E0DT45; R0HZZ0; B9FJW3; A0A2I4EJ14; A0A1D6M6T9; I1L6X0; F2DMB5; A0A2P5B9Y0; A0A287SQW0; A0A1U8IMJ1; A0A1U8BFT3; A0A2G9GK53; A0A0E0A0S4; A0A287SQS7; J3MJJ0; A0A067JPA7; A0A078GRE9; A0A0K9R8R0; C0HGN4; A3BHY3; A0A1S4AX96; A0A1U7YXW0; A0A1U8E5L6; A0A068UCU1; A0A2C9VA53; A0A1D6FSF1; A0A078HF04; I1L6X1; A0A1U8KE54; A0A0E0PP31; A0A2G5DRK7; A0A0E0PP30; C5YZU7; J3M878; A0A2G5DRN0; A0A1D6HW73; A0A1R3K…	B9T0N9 [40-52]	0	1790	13	1.041	1.113	1.048	0.815	1.282	0.06	0.15	0.07	-0.3	0.36	95.3	99.2	106	99.8	77.6	122.1	193.7	201.6	215.5	203	157.8	248.2	139.3	113.3	144.7	106.4	157.8	151.4	1
FALSE	High	Unambiguous	MEVELIHPVACEEGMR	[K].MEVELIHPVACEEGMR.[F]	1xiodoTMT6plex [C11]	1xiodoTMT6plex [C11]			0.025874	0	0.393	1	1	1	1108926884	1108926884	1108926884 [505-520]	0	2172.08	16	0.494	0.712	0.915	0.803	0.719	-1.02	-0.49	-0.13	-0.32	-0.48	129.2	63.9	92	118.2	103.7	93	455.1	225	323.9	416.4	365.2	327.4	327.3	126.4	217.5	218.3	365.2	199.7	1
FALSE	High	Unambiguous	VVTIFSAPNYCYR	[K].VVTIFSAPNYCYR.[C]	1xiodoTMT6plex [C11]	1xiodoTMT6plex [C11]			0.0117033	0	0.522	1	251	1	A0A2P5B2C2	A0A2G3AHS5; B9H9Y9; A0A2R6PQN3; A0A1Q3D0W6; F2DDJ0; A0A161X442; M4DK42; A0A2G9GZB3; A0A251SCX7; A0A1U8MN16; O04860; A0A251N8M1; A0A0D2QQ19; A0A0L9U9H2; C0P9T1; 731325420; B9SM47; A0A1E5UL43; A0A0D3B6D2; A0A1U7X6F1; A0A251VL25; A0A0A9UNL4; V4LQR8; G8A1A9; M0SSX3; I1QUE7; A0A068VCD9; B4FLR7; A0A2C9W892; A0A2H3XVC5; A0A2P5RV77; A0A1S3YU06; A0A2G9I5X4; A0A067FA26; M0TQN9; A0A0V0I9Q0; C1KIY6; A0A0D9ZE…	A0A2P5B2C2 [748-760]	0	1861.98	13	0.835	1.093	0.957	0.881	0.922	-0.26	0.13	-0.06	-0.18	-0.12	105.5	88.1	115.3	100.9	92.9	97.3	406.1	339.2	443.9	388.6	357.9	374.6	292.1	190.6	298.1	203.7	357.9	228.5	1
FALSE	High	Unambiguous	ITQLTDNVYVCR	[K].ITQLTDNVYVCR.[S]	1xiodoTMT6plex [C11]	1xiodoTMT6plex [C11]			0.0773202	0.000962316	0.215	1	102	1	731318027	Q6R1M8; C5Z3R9; A0A0E0K5Q3; A0A199UXD1; A0A2P5WRH6; A0A2I0ABM7; W9S9W3; A0A251RDT6; A0A1U8MI26; V4P3R6; B7FGZ8; V7AXZ9; A0A2P5YAW8; C9DFB5; M4D453; A0A2P5QPH1; A0A1D6LKR5; I1K964; I3SPC4; A0A087GIK9; 731318027; A0A2N9I1I6; D7MB80; A0A1S3YP28; A0A0L9UGN8; A0A1R3GV32; B4FA84; A0A1U8F305; F4JRY2; A0A2I4GNX3; K4AE97; A0A2G5DKA5; J3LHH2; A0A2I0HJB3; B4FRJ3; B4UWD9; A0A078GSR5; Q5VPF1; A0A218WYF4; A0A1…	731318027 [48-59]	0	1753.95	12	0.725	0.83	0.807	0.755	0.82	-0.46	-0.27	-0.31	-0.41	-0.29	121.5	88.1	100.8	98.1	91.7	99.7	296.7	215.2	246.2	239.6	223.9	243.3	213.4	120.9	165.3	125.6	223.9	148.4	1
FALSE	High	Unambiguous	TTVGVAPTFTCTER	[R].TTVGVAPTFTCTER.[L]	1xiodoTMT6plex [C11]	1xiodoTMT6plex [C11]			0.0518419	0	0.28	1	4	1	A0A0K9QHB1	A0A0K9QJ95; 1108911406; A0A0K9QHB1; 731328552	A0A0K9QHB1 [190-203]	0	1811.95	14	1.131	1.219	1.072	0.742	0.913	0.18	0.29	0.1	-0.43	-0.13	98.7	111.7	120.4	105.8	73.2	90.2	351.8	397.8	428.7	376.9	260.9	321.3	253	223.5	287.9	197.6	260.9	196	1
FALSE	High	Unambiguous	DVEEDIIPTCR	[R].DVEEDIIPTCR.[EFTHC]	1xiodoTMT6plex [C10]	1xiodoTMT6plex [C10]			0.107777	0.00224036	0.161	1	130	2	A0A0E0KP46	V4UBC2; A2XRZ0; A0A1D5T9N9; A0A2J6MBD8; A0A0D3FUB0; A0A287INI8; M5XDT8; A0A2H5PHJ2; A0A0E0DCM1; A0A287INI1; A0A1D5TW01; Q7XQ49; A0A287I9T5; F2DLJ7; A0A2J6MBF6; A0A287INI9; C5Z396; A0A287I9U9; A0A0D3FUA9; J3LWU6; A0A2I0IX80; A0A0D9ZJ29; A0A1J3DBR4; A0A218WF35; A0A1D5T9P1; A0A1J3CTM1; A0A2P5FCR2; F4HPY8; A0A1D6RI04; O22627; T1M831; T1M2Y3; A2XRY9; F2E645; A0A1J3IV10; 731325021; A2Q5A8; A0A287INN8; …	A0A0E0KP46 [755-765]	0	1618.83	11	0.722	0.74	0.912	0.644	0.893	-0.47	-0.43	-0.13	-0.63	-0.16	122.2	88.2	90.4	111.3	78.7	109.1	726.8	525	538.1	662.5	468.2	649.2	522.7	295	361.3	347.3	468.2	396	2
FALSE	High	Selected	SLYQPQLPPCLQGTTVR	[R].SLYQPQLPPCLQGTTVR.[V]	1xiodoTMT6plex [C10]	1xiodoTMT6plex [C10]			0.0988852	0.00224036	0.175	1	3	1	A0A1J7HHJ5	A0A1J7HHJ5; A0A2I4FMX1; A0A118K4J6	A0A1J7HHJ5 [19-35]	0	2230.22	17	0.76	0.756	1.049	0.782	0.824	-0.4	-0.4	0.07	-0.35	-0.28	116	88.2	87.7	121.7	90.7	95.6	250	189.9	189	262.3	195.5	205.9	179.8	106.7	126.9	137.5	195.5	125.6	1
FALSE	High	Rejected	SQYLPQLPPCLQGTTVR	[R].SQYLPQLPPCLQGTTVR.[V]	1xiodoTMT6plex [C10]	1xiodoTMT6plex [C10]			0.118921	0.00257247	0.145	0	1	1		A0A0D3D171		0	2230.22	17
FALSE	High	Unambiguous	LLPDAVGTTCGQR	[R].LLPDAVGTTCGQR.[LVIM]	1xiodoTMT6plex [C10]	1xiodoTMT6plex [C10]			0.00660558	0	0.615	1	252	3	1108966238	F1BX57; E9KNK7; E9KNP3; Q1L5V5; A0A0D5CTT7; Q6SJP5; A0A2I0B885; Q8W1W2; A0A0P0WTZ1; A0A0U1VKZ6; E9KNN9; A0A2I4EZR2; A0A145WE46; D7US90; A0A1D8X9E2; Q1L5V8; A0A2G9H7N8; E9KNM5; M0RJE1; A0A0D2SIE3; E9KNK6; A0A1R3IUX0; Q2HWR2; E9KNP4; A0A1U8I6I4; Q9T0M9; A2YA91; Q4LEV1; Q9SLY1; A0A096YGX8; A0A151SSH8; A0A1L1W296; C0SW06; A0A1R3H9T6; G8XR51; J7MCM9; Q8GTA3; P30298; I0IK60; I1SUZ1; A0A199VHQ6; I1T4R7;…	1108966238 [335-347]	0	1659.9	13	0.626	0.896	0.689	1.009	0.533	-0.68	-0.16	-0.54	0.01	-0.91	126.3	79	113.1	86.9	127.4	67.3	2237.7	1399.8	2004.2	1540.7	2256.8	1193.2	1609.4	786.5	1345.8	807.7	2256.8	727.8	3
FALSE	High	Unambiguous	SLYKPELPPCLQGTTVR	[R].SLYKPELPPCLQGTTVR.[V]	1xiodoTMT6plex [C10]	1xiodoTMT6plex [C10]			0.0638989	0.000962316	0.246	1	3	1	Q41140	A0A2J6MJF0; Q41140; A0A118K4J4	Q41140 [19-35]	0	2231.24	17	0.687	0.73	0.867	0.956	0.612	-0.54	-0.45	-0.21	-0.06	-0.71	123.7	85	90.3	107.2	118.3	75.6	488.2	335.5	356.4	423.1	466.8	298.5	351.1	188.5	239.3	221.8	466.8	182.1	1
FALSE	High	Unambiguous	NATWTLSNFCR	[R].NATWTLSNFCR.[G]	1xiodoTMT6plex [C10]	1xiodoTMT6plex [C10]			0.170941	0.00563879	0.086	3	253	1	731320622; 731346765; 731327532	A0A1U8I828; A0A2G9GH76; A0A1S2XYI7; A0A067H1Q7; R0GNU8; A0A1U8K0B9; Q9SLX0; A0A0L9U970; A0A1R3IHJ1; A0A1U7XRK2; A0A1S3YZV1; A0A0S3RIG7; A4S2X9; A0A1U8MFF8; A0A2P6VHS5; A0A2P5PXL5; B8AY77; A0A0D2QRG1; R0H3W3; A0A2R6PNU1; A0A1D5VXC6; K4B1A3; M1AB60; A0A2P5D166; A0A1U8HPC2; A0A2H5NLI5; A0A0S3SQJ1; A0A067JV78; V4MA88; A0A0D3ASA7; A0A067HGK4; F4JL11; A0A1U8P4V6; M0TN57; M1CXI3; A0A0V0IM05; A0A0D2MY73;…	731320622 [221-231]; 731346765 [222-232]; 731327532 [223-233]	0	1641.84	11	1.164	1.245	0.92	0.815	1.078	0.22	0.32	-0.12	-0.3	0.11	96.4	112.3	120.1	88.7	78.6	104	489.6	569.9	609.5	450.2	398.8	527.9	352.1	320.2	409.3	236	398.8	322	1
FALSE	High	Unambiguous	VAPVTPFEFCYDEFPSTR	[R].VAPVTPFEFCYDEFPSTR.[V]	1xiodoTMT6plex [C10]	1xiodoTMT6plex [C10]			0.0103488	0	0.542	1	1	2	731333104	731333104	731333104 [329-346]	0	2434.2	18	0.768	1.467	0.487	2.09	0.458	-0.38	0.55	-1.04	1.06	-1.13	95.7	73.4	140.4	46.6	200	43.8	551.1	423.1	808.8	268.6	1152	252.3	396.4	237.7	543.1	140.8	1152	153.9	2
FALSE	High	Unambiguous	LDASHDESHCPGAAAR	[K].LDASHDESHCPGAAAR.[I]	1xiodoTMT6plex [C10]	1xiodoTMT6plex [C10]			0.134487	0.00292848	0.125	1	1	1	731326017	731326017	731326017 [160-175]	0	1965.94	16	1.254	1.009	1.308	0.914	1.315	0.33	0.01	0.39	-0.13	0.4	88.2	110.6	89.1	115.4	80.7	116	373	467.7	376.5	487.8	341	490.5	268.3	262.8	252.8	255.7	341	299.2	1
FALSE	High	Unambiguous	INVYYNEAGCGR	[R].INVYYNEAGCGR.[F]	1xiodoTMT6plex [C10]	1xiodoTMT6plex [C10]			0.00865831	0	0.571	1	2	7	731348756	A0A0K9QIW0; 731348756	731348756 [47-58]	0	1687.84	12	0.884	1.208	1.06	1.3	1.106	-0.18	0.27	0.08	0.38	0.15	91.5	80.9	110.5	97	118.9	101.2	4318.4	3816	5215	4577.7	5612.9	4777.1	3105.9	2144.1	3501.8	2399.8	5612.9	2913.8	7
FALSE	High	Unambiguous	VNVYYNEASCGR	[R].VNVYYNEASCGR.[FYHL]	1xiodoTMT6plex [C10]	1xiodoTMT6plex [C10]			0.00257783	0	0.768	2	254	7	731325985; J3LJ13	A0A0D2RXC7; A0A2G9HY56; A0A2I0J845; A0A2H5NU63; A0A0D3C2W7; A0A2R6PM77; A0A1S3YYR6; M4DPD8; A0A0E0FK81; V4NHI6; A0A2G5C5F8; A0A097CPK2; A0A199VTR1; A0A2I0JPG6; Q40106; J9RMU3; A0A287LTU6; A0A022Q2Q4; Q43697; A0A178VS27; Q9ZRB1; B8ALG6; 731325985; A0A1Q3CVI3; C5XMJ4; A0A1R3G5K5; P29516; P18025; A0A200QUC5; A0A1U8BDJ4; A0A067JZL4; A0A2G5EW64; A0A0C9S5R5; P33631; Q65C76; A0A1R3J5D4; B6T505; A0A218X1…	731325985 [47-58]; J3LJ13 [47-58]	0	1703.84	12	1.071	1.043	1.19	1.152	1.232	0.1	0.06	0.25	0.2	0.3	89.7	96	93.5	106.8	103.3	110.6	5754.4	6160.4	5999.6	6848.9	6628.3	7090.8	4138.7	3461.3	4028.7	3590.5	6628.3	4325	7
FALSE	High	Unambiguous	VKEFEQARNCLLPMGITSENVAHR	[K].VKEFEQARNCLLPMGITSENVAHR.[F]	1xiodoTMT6plex [C10]	1xiodoTMT6plex [C10]			0.00814186	0	0.581	1	1	1	Q42918	Q42918	Q42918 [183-206]	2	3071.61	24	1.215	1.324	1.686	0.858	1.478	0.28	0.4	0.75	-0.22	0.56	79.4	96.4	105.1	133.8	68.1	117.3	155.4	188.8	205.8	262.1	133.3	229.7	111.8	106.1	138.2	137.4	133.3	140.1	1
FALSE	High	Unambiguous	FSYSVPDMGCER	[K].FSYSVPDMGCER.[C]	1xiodoTMT6plex [C10]	1xiodoTMT6plex [C10]			0.0169265	0	0.462	1	1	2	731376583	731376583	731376583 [278-289]	0	1719.8	12	0.884	0.707	0.842	0.889	0.815	-0.18	-0.5	-0.25	-0.17	-0.29	116.8	103.3	82.5	98.3	103.9	95.2	1009.1	892.6	713	849.8	897.4	822.5	725.8	501.5	478.8	445.5	897.4	501.7	2
FALSE	High	Unambiguous	LADGLFLESCR	[K].LADGLFLESCR.[EQKDH]	1xiodoTMT6plex [C10]	1xiodoTMT6plex [C10]			0.127245	0.00257247	0.134	1	252	1	A0A165AAK6	A0A2G9I7Y7; 731357516; A0A0S3RIY5; A0A2I0W2W0; A0A2I4E0J5; A0A0S3T443; A0A022RJ80; D8SPP4; R0F7H8; A0A1D1YUK3; A0A1S4B4G8; A0A103YGN9; V7B9K5; A0A059AS74; A0A2K2AXK4; A0A1J6KDV5; A0A2C9WCY7; A0A2H3ZUW5; C0P7Q1; A0A0C9S6L7; I3T5L9; C5XWJ7; A0A1S3YYZ0; A0A251SQ58; A0A1D6RLV5; A0A2P5QYL6; R0F5W0; A0A2G2XFX0; A0A1U8FMB2; A0A287INM1; A0A1U8KVX8; A0A2I4DRG6; A0A1J3J622; A0A2G5EM87; A0A1J3H5L8; W1PY37; …	A0A165AAK6 [428-438]	0	1552.84	11	0.733	0.753	0.76	0.709	0.86	-0.45	-0.41	-0.4	-0.5	-0.22	124.6	91.3	93.9	94.7	88.4	107.2	455.1	333.5	342.8	345.8	322.7	391.5	327.3	187.4	230.2	181.3	322.7	238.8	1
FALSE	High	Unambiguous	CFVGGLAWATDDR	[R].CFVGGLAWATDDR.[ASTG-]	1xiodoTMT6plex [C1]	1xiodoTMT6plex [C1]			0.00656508	0	0.616	2	73	5	A0A061DZ10; 731358684	A0A178VQY8; C0Z387; C0Z2N6; Q6ASX7; O24187; A0A0D2V7C3; A0A2R6R1R2; A0A0P0W1Y6; A0A0P0W1U8; E5FXB3; A0A0D2W185; M0SJ71; A9NML8; I1PE90; H2KX69; B8AP37; B6VA25; A0A199VVH1; Q8VXC4; A0A0E0KHA7; A0A0E0RKD9; A0A0D9VX80; A0A0E0BVL0; A2ZN20; A0A0E0NZC7; A0A0D3FM91; A0A0E0NZC8; A6N0Q8; A0A0C4MM22; A0A0B0MVD1; A0A0B0PHF0; Q10FE7; I1GPP5; I3ZNU0; A0A061DZ10; A0A087GSM4; A0A0E0FET8; A0A078J5Z4; A0A0D9Y1Q9;…	A0A061DZ10 [10-22]; 731358684 [8-20]	0	1739.87	13	1.163	1.048	1.202	0.875	0.996	0.22	0.07	0.27	-0.19	-0.01	95.5	111.1	100.1	114.8	83.6	95.1	1115.4	1297.3	1168.9	1340.6	976.2	1110.4	802.2	728.9	784.9	702.8	976.2	677.3	5
FALSE	High	Unambiguous	CTSIAWVPR	[R].CTSIAWVPR.[G]	1xiodoTMT6plex [C1]	1xiodoTMT6plex [C1]			0.111828	0.00224036	0.155	1	1	1	731345808	731345808	731345808 [243-251]	0	1361.76	9	1.23	1.56	1.03	0.937	0.899	0.3	0.64	0.04	-0.09	-0.15	90.1	110.9	140.6	92.9	84.5	81	231.1	284.2	360.4	238.1	216.5	207.7	166.2	159.7	242	124.8	216.5	126.7	1
FALSE	High	Unambiguous	CPNLVNIVR	[R].CPNLVNIVR.[S]	1xiodoTMT6plex [C1]	1xiodoTMT6plex [C1]			0.0354064	0	0.342	1	1	8	731344680	731344680	731344680 [42-50]	0	1356.8	9	1.111	1.349	1.139	1.764	1.695	0.15	0.43	0.19	0.82	0.76	74.5	82.8	100.4	84.8	131.4	126.2	1719.8	1911.1	2319.5	1958.5	3033.7	2914.3	1236.9	1073.8	1557.5	1026.7	3033.7	1777.6	8
FALSE	High	Unambiguous	CGNVNFSFR	[SKGT].CGNVNFSFR.[TM]	1xiodoTMT6plex [C1]	1xiodoTMT6plex [C1]			0.0822248	0.000962316	0.205	1	47	1	A0A0C9S8X9	A0A0S3S1B9; V7D076; A0A1S2YCE7; A0A103YAX0; C6TN02; A0A2G2YF90; A0A072V1K4; A0A2R6REZ0; A0A1R3GR06; A0A0B2QVH3; A0A2K3P840; A0A2G2VNK9; A0A2R6QRE3; A0A1S3ZCF4; A0A1U8BN45; A0A118JY19; G7JBG4; A0A2G9H1A6; A0A2R6REI7; I1LN73; A0A0V0I4C2; A0A2J6JY27; 731343162; A0A0R0ETV2; A0A1S4D063; A0A175YR58; D7TAZ0; A0A1U8F446; A0A1S3TL26; A0A1R3IZX2; A0A0D6R1Y0; A0A2K2B8J7; A0A2G9H1U4; B9GZQ6; A0A0K9QB08; A0A2…	A0A0C9S8X9 [31-39]	0	1372.7	9	1.459	1.522	1.164	1.471	1.107	0.55	0.61	0.22	0.56	0.15	77.7	113.4	118.3	90.4	114.3	86	360.7	526.3	549.1	419.7	530.6	399.4	259.4	295.7	368.7	220	530.6	243.6	1
FALSE	High	Unambiguous	CGISDVFAYPGGASMEIHQALTR	[R].CGISDVFAYPGGASMEIHQALTR.[S]	1xiodoTMT6plex [C1]	1xiodoTMT6plex [C1]			6.97276e-05	0	1.355	1	41	1	A0A0M3TGF7	A0A0M4NDK0; A0A088FP22; V9TJP6; A0A088FL26; A0A125SL92; A0A1Q2U746; V9TFA4; G9FL28; G9FL15; A0A125SL91; A0A088Q0H1; A0A060GK13; A0A088FK40; A0A060GND0; A0A125SL95; V9TIM4; A0A088FL22; A0A060GP18; A0A088FP18; A0A088PY21; G9FL21; A0A088FK67; A0A060GVA9; G9FL23; G9FL19; A0A088FL17; A0A125SL94; A0A0M3TGF7; A0A088FK38; A0A0P0QMC7; V9TIL9; A0A088FNZ9; A0A125SL87; V9TH59; A0A088FK45; A0A125SL89; A0A088F…	A0A0M3TGF7 [82-104]	0	2752.37	23	1.212	1.208	1.554	0.527	1.38	0.28	0.27	0.64	-0.92	0.47	87.2	105.7	105.3	135.5	46	120.4	80.6	97.7	97.4	125.3	42.5	111.3	58	54.9	65.4	65.7	42.5	67.9	1
FALSE	High	Unambiguous	CTTISPTLVISNIGYR	[K].CTTISPTLVISNIGYR.[Q]	1xiodoTMT6plex [C1]	1xiodoTMT6plex [C1]			0.103235	0.00224036	0.168	1	1	1	1108975637	1108975637	1108975637 [260-275]	0	2067.15	16	1.214	1.081	1.012	0.807	1.187	0.28	0.11	0.02	-0.31	0.25	95.2	115.6	103	96.4	76.8	113	145.3	176.4	157.1	147.1	117.2	172.5	104.5	99.1	105.5	77.1	117.2	105.2	1
FALSE	High	Unambiguous	CGPAAEFNNVNWTQVR	[K].CGPAAEFNNVNWTQVR.[A]	1xiodoTMT6plex [C1]	1xiodoTMT6plex [C1]			0.000495951	0	1.036	1	1	5	731312253	731312253	731312253 [107-122]	0	2135.07	16	1.496	1.019	1.434	0.776	1.236	0.58	0.03	0.52	-0.37	0.31	86.2	129	87.8	123.6	66.9	106.5	1724.5	2580.3	1757	2472.5	1337.5	2131.3	1240.3	1449.8	1179.8	1296.2	1337.5	1300	5
FALSE	High	Unambiguous	CVFSLLR	[R].CVFSLLR.[D]	1xiodoTMT6plex [C1]	1xiodoTMT6plex [C1]			0.200582	0.00652397	0.06	1	1	1	731357289	731357289	731357289 [58-64]	0	1166.69	7	1.072	0.97	0.841	0.8	1.212	0.1	-0.04	-0.25	-0.32	0.28	101.8	109.1	98.7	85.6	81.4	123.4	69.4	74.4	67.3	58.4	55.5	84.1	49.9	41.8	45.2	30.6	55.5	51.3	1
FALSE	High	Unambiguous	CPFTGSVSIR	[K].CPFTGSVSIR.[G]	1xiodoTMT6plex [C1]	1xiodoTMT6plex [C1]			0.0324854	0	0.356	1	8	1	A0A0D6R3P6	A0A068VE07; A0A0D6R3P6; A0A2G9I065; 731316767; A0A0K9RPC5; U5CVW0; 731352879; A0A0K9QRZ2	A0A0D6R3P6 [63-72]	0	1395.76	10	1.292	1.501	1.556	1.208	1.303	0.37	0.59	0.64	0.27	0.38	76.3	98.6	114.6	118.8	92.2	99.5	374.7	484.1	562.5	583.1	452.8	488.4	269.5	272	377.7	305.7	452.8	297.9	1
FALSE	High	Unambiguous	CTQLDSNLQQR	[R].CTQLDSNLQQR.[V]	1xiodoTMT6plex [C1]	1xiodoTMT6plex [C1]			0.0918502	0.00187066	0.187	1	1	1	731370585	731370585	731370585 [76-86]	0	1634.85	11	1.21	1.359	1.448	0.87	1.442	0.27	0.44	0.53	-0.2	0.53	81.9	99.1	111.3	118.5	71.2	118.1	286.6	346.7	389.4	414.9	249.2	413.3	206.1	194.8	261.5	217.5	249.2	252.1	1
FALSE	High	Unambiguous	CENTALLGER	[RK].CENTALLGER.[K]	1xiodoTMT6plex [C1]	1xiodoTMT6plex [C1]			0.0461246	0	0.299	1	10	2	731317849	A0A0A0N2U8; W1PR98; K4AVE6; A0A2I0VUY7; F6HVY1; A0A2H3YL55; 731317849; A0A2P6Q8C4; Q9M511; S8C589	731317849 [166-175]	0	1434.76	10	1.153	1.088	1.181	1.044	0.93	0.21	0.12	0.24	0.06	-0.1	93.8	108.2	102	110.8	97.9	87.3	316.3	364.9	344	373.7	330.1	294.3	227.5	205	231	195.9	330.1	179.5	1
FALSE	High	Unambiguous	CGFSSLAVR	[R].CGFSSLAVR.[V]	1xiodoTMT6plex [C1]	1xiodoTMT6plex [C1]			0.0534609	0	0.275	1	24	3	A5BLN1	M1CRX9; A0A1U7XS56; A0A1J6KNJ6; A0A1S3YH99; A5BLN1; A0A022QIH2; A0A2R6RRZ1; A0A068V3E8; 731312816; A0A103XX44; D7U0W6; A0A2G2ZC41; A0A2J6M6Z2; A0A251TLE8; A0A200RBL6; A0A068TQ22; A0A2G3C8Z5; K4C7X1; A0A0K9RRI8; A0A0V0H9Y9; A0A1J6ISV3; A0A251RWN3; M1CRY0; A0A164W5F1	A5BLN1 [328-336]	0	1268.7	9	1.391	1.419	0.947	1.077	1.267	0.48	0.51	-0.08	0.11	0.34	84.5	117.5	119.9	80	91	107.1	2307.6	3208.8	3275.6	2185.3	2485.6	2924.7	1659.7	1802.9	2199.5	1145.6	2485.6	1783.9	3
FALSE	High	Unambiguous	CLVDVGGGLGHSVR	[K].CLVDVGGGLGHSVR.[F]	1xiodoTMT6plex [C1]	1xiodoTMT6plex [C1]			0.00178237	0	0.828	1	1	1	731311070	731311070	731311070 [210-223]	0	1697.93	14	1.061	1.129	0.838	1.139	0.985	0.09	0.18	-0.25	0.19	-0.02	97.5	103.5	110.1	81.7	111.1	96.1	165.9	176	187.3	139.1	189	163.5	119.3	98.9	125.8	72.9	189	99.7	1
FALSE	High	Unambiguous	CELQSALDINNQR	[R].CELQSALDINNQR.[Q]	1xiodoTMT6plex [C1]	1xiodoTMT6plex [C1]			0.00106326	0	0.912	1	1	2	731369461	731369461	731369461 [393-405]	0	1832.95	13	0.968	1.296	1.262	0.88	1.115	-0.05	0.37	0.34	-0.19	0.16	92	89.1	119.3	116.1	80.9	102.6	624.3	604.4	809.2	787.8	549.1	696.3	449	339.6	543.4	413	549.1	424.7	2
FALSE	High	Unambiguous	CDDGTFARAAVPSGASTGVYEALELR	[R].CDDGTFARAAVPSGASTGVYEALELR.[D]	1xiodoTMT6plex [C1]	1xiodoTMT6plex [C1]			0.061584	0.00054243	0.252	1	1	1	M0RUI7	M0RUI7	M0RUI7 [27-52]	1	2985.49	26	0.756	0.758	0.971	0.397	1.012	-0.4	-0.4	-0.04	-1.33	0.02	122.6	92.6	93	119.1	48.7	124	68.5	51.8	52	66.6	27.2	69.4	49.3	29.1	34.9	34.9	27.2	42.3	1
FALSE	High	Unambiguous	CLGFSTVQPVNPR	[R].CLGFSTVQPVNPR.[V]	1xiodoTMT6plex [C1]	1xiodoTMT6plex [C1]			0.0203562	0	0.432	1	2	1	731337809	731337809; A0A0K9QXI5	731337809 [68-80]	0	1746.95	13	1.431	1.492	1.394	0.914	1.471	0.52	0.58	0.48	-0.13	0.56	77.9	111.5	116.2	108.6	71.2	114.6	294.3	421.1	439	410.3	269	433	211.7	236.6	294.8	215.1	269	264.1	1
FALSE	High	Unambiguous	CVLIESSSPR	[K].CVLIESSSPR.[A]	1xiodoTMT6plex [C1]	1xiodoTMT6plex [C1]			0.0337065	0	0.35	1	2	2	731353609	731353609; 731353611	731353609 [97-106]	0	1419.78	10	1.841	1.233	1.416	1.101	1.277	0.88	0.3	0.5	0.14	0.35	76.3	140.4	94.1	108	83.9	97.4	553.7	1019.5	682.8	783.8	609.3	706.9	398.2	572.8	458.5	410.9	609.3	431.2	2
FALSE	High	Unambiguous	CAEYYAAGAR	[R].CAEYYAAGAR.[F]	1xiodoTMT6plex [C1]	1xiodoTMT6plex [C1]			0.0265184	0	0.389	1	1	4	731345323	731345323	731345323 [130-139]	0	1403.69	10	0.844	0.852	1.098	0.806	0.765	-0.24	-0.23	0.13	-0.31	-0.39	111.8	94.4	95.3	122.8	90.1	85.6	2505.2	2114.2	2134.7	2750.3	2019.1	1917.2	1801.8	1187.9	1433.4	1441.8	2019.1	1169.4	4
FALSE	High	Unambiguous	CTNVAFDYSGR	[R].CTNVAFDYSGR.[C]	1xiodoTMT6plex [C1]	1xiodoTMT6plex [C1]			0.0709414	0.000962316	0.229	1	1	1	A0A0J8B6Z7	A0A0J8B6Z7	A0A0J8B6Z7 [78-88]	0	1561.76	11	0.622	0.879	1.042	0.473	0.905	-0.68	-0.19	0.06	-1.08	-0.14	121.9	75.9	107.1	127	57.7	110.4	145.6	90.6	127.9	151.6	68.9	131.8	104.7	50.9	85.9	79.5	68.9	80.4	1
FALSE	High	Unambiguous	CPYYSVVQSQDDR	[R].CPYYSVVQSQDDR.[C]	1xiodoTMT6plex [C1]	1xiodoTMT6plex [C1]			0.00107641	0	0.91	1	1	34	731344067	731344067	731344067 [80-92]	0	1888.91	13	1.338	0.831	1.179	0.684	0.538	0.42	-0.27	0.24	-0.55	-0.89	107.7	144.1	89.5	127	73.7	57.9	20615.8	27583	17128.3	24302.2	14108.7	11089.6	14827.4	15498	11501.5	12740.2	14108.7	6764.1	34
FALSE	High	Unambiguous	CLLTSPHLVR	[K].CLLTSPHLVR.[SQERA]	1xiodoTMT6plex [C1]	1xiodoTMT6plex [C1]			0.0631178	0.00054243	0.248	1	12	1	A0A0K9QDW5	A0A162AJW0; A0A0K9QDW5; A0A2K2AK51; A0A0A0LKT7; A0A1Q3CE53; A0A2K2BDM5; 731336136; A0A2K2BDN0; A0A0K9QBT1; A0A2K2AK54; A0A1S3BMQ2; A0A2K2AK52	A0A0K9QDW5 [44-53]	0	1467.87	10	1.236	2.456	1.147	1.652	1.065	0.31	1.3	0.2	0.72	0.09	70.1	86.7	172.2	80.4	115.9	74.7	73	90.2	179.3	83.7	120.6	77.7	52.5	50.7	120.4	43.9	120.6	47.4	1
FALSE	High	Unambiguous	CFTSFSR	[RK].CFTSFSR.[S]	1xiodoTMT6plex [C1]	1xiodoTMT6plex [C1]			0.167816	0.00563879	0.089	1	10	1	A0A0P0LY91	G7JQS4; A0A1S2XC93; A0A1U8NC54; R9S9T1; A0A2P5Y475; A0A0D2STB5; A0A1J7H1C6; A0A0P0LY91; A0A1U8IUM9; A0A0J8BA53	A0A0P0LY91 [152-158]	0	1176.6	7	1.935	2.525	1.554	1.721	1.2	0.95	1.34	0.64	0.78	0.26	60.4	116.9	152.5	93.9	103.9	72.5	190.5	368.6	481	296	327.8	228.5	137	207.1	323	155.2	327.8	139.4	1
FALSE	High	Unambiguous	CALVYGQMNEPPGAR	[K].CALVYGQMNEPPGAR.[A]	1xiodoTMT6plex [C1]	1xiodoTMT6plex [C1]			0.000274807	0	1.132	4	251	19	A0A2P4LXF3; M0UCJ4; 731341013; A0A175YRR8	A0A287GJ54; A0A0A0KTA5; F2D5B2; O82722; D7M1G9; W5DDM7; A0A0D2VYM2; A0A1J7HJE4; A0A061E5Q6; A0A0A0KPJ2; A0A2H3XR79; A9NUR7; A0A1U8FHC9; A0A0K9NYL5; A0A1D5VBW3; A0A2P4LXF3; A0A0D2S1Z3; A0A059BEJ4; A0A2I0KLL8; A0A287LBT9; D8QQX5; A0A2I0XEZ3; A0A1U8EIM6; A0A1E5WI54; A0A0D2V4L6; A0A0D2VYM6; A0A0V0IJL8; A0A1J6K2R3; B8A7M8; A0A0E0L5G3; A0A1U8FNM3; P19023; A0A2G5F6M9; A0A0D3EGT2; A0A0S3SM21; A0A1U8F1W2;…	A0A2P4LXF3 [515-529]; M0UCJ4 [319-333]; 731341013 [289-303]; A0A175YRR8 [155-169]	0	1934.98	15	1.163	1.19	1.216	0.878	1.214	0.22	0.25	0.28	-0.19	0.28	90.1	104.8	107.2	109.5	79	109.3	6712.8	7810	7989.5	8163.2	5890.5	8147.7	4828	4388.2	5364.9	4279.5	5890.5	4969.7	19
FALSE	High	Unambiguous	MDDAEGVGGGGDPVEQFHR	[-].MDDAEGVGGGGDPVEQFHR.[N]	1xAcetyl [N-Term]	1xAcetyl [N-Term]	731330073 1xAcetyl [N-Term]	731330073 1xAcetyl [N-Term]	0.000238559	0	1.155	1	1	1	731330073	731330073	731330073 [1-19]	0	2014.86	19
FALSE	High	Unambiguous	MNSVEGMGELQHLQTLEGHTDR	[-].MNSVEGMGELQHLQTLEGHTDR.[V]	1xAcetyl [N-Term]	1xAcetyl [N-Term]	731365841 1xAcetyl [N-Term]	731365841 1xAcetyl [N-Term]	0.00229354	0	0.787	1	2	1	731365841	731365841; 731365843	731365841 [1-22]	0	2524.16	22
FALSE	High	Unambiguous	MLGVFSSSVVSPPEELVAAGSR	[-].MLGVFSSSVVSPPEELVAAGSR.[T]	1xAcetyl [N-Term]	1xAcetyl [N-Term]	731364516 1xAcetyl [N-Term]	731364516 1xAcetyl [N-Term]	0.00302482	0	0.742	1	2	1	731364516	731364516; A0A0K9RN92	731364516 [1-22]	0	2261.15	22
FALSE	High	Unambiguous	MDTSIQVQR	[-].MDTSIQVQR.[V]	1xAcetyl [N-Term]	1xAcetyl [N-Term]	731322096 1xAcetyl [N-Term]	731322096 1xAcetyl [N-Term]	0.129614	0.00257247	0.131	1	1	1	731322096	731322096	731322096 [1-9]	0	1119.55	9
FALSE	High	Unambiguous	KIGINGFGR	[-].KIGINGFGR.[I]	1xAcetyl [N-Term]	1xAcetyl [N-Term]	G9FP70 1xAcetyl [N-Term]	G9FP70 1xAcetyl [N-Term]	0.167816	0.00563879	0.089	1	13	1	G9FP70	H9B637; G3KB91; G3KB88; G9FP71; I3WB99; G9FP70; Q20FB3; H9B636; G9FP73; G9FP72; G3KB89; I3WB96; I3WB97	G9FP70 [1-9]	1	1003.57	9
FALSE	High	Unambiguous	MYRHMAATETRGGQPTDSGDAVVTLDQVPR	[-].MYRHMAATETRGGQPTDSGDAVVTLDQVPR.[W]	1xAcetyl [N-Term]	1xAcetyl [N-Term]	A0A251U2I5 1xAcetyl [N-Term]	A0A251U2I5 1xAcetyl [N-Term]	0.149309	0.00333266	0.108	1	1	1	A0A251U2I5	A0A251U2I5	A0A251U2I5 [1-30]	2	3301.57	30
FALSE	High	Unambiguous	MEGIPPDQQR	[-].MEGIPPDQQR.[L]	1xAcetyl [N-Term]	1xAcetyl [N-Term]	A0A2K1XCX9 1xAcetyl [N-Term]	A0A2K1XCX9 1xAcetyl [N-Term]	0.0736081	0.000962316	0.223	1	1	1	A0A2K1XCX9	A0A2K1XCX9	A0A2K1XCX9 [1-10]	0	1212.57	10
FALSE	High	Unambiguous	MDSHEISLR	[-].MDSHEISLR.[Q]	1xAcetyl [N-Term]	1xAcetyl [N-Term]	A0A0J8B6U7 1xAcetyl [N-Term]	A0A0J8B6U7 1xAcetyl [N-Term]	0.0490504	0	0.289	1	1	1	A0A0J8B6U7	A0A0J8B6U7	A0A0J8B6U7 [1-9]	0	1129.53	9
FALSE	High	Unambiguous	ADPELEAIRQR	[-].ADPELEAIRQR.[R]	1xAcetyl [N-Term]	1xAcetyl [N-Term]	I1PXM1 1xAcetyl [N-Term]	I1PXM1 1xAcetyl [N-Term]	0.0537907	0	0.274	1	6	1	I1PXM1	A0A2R6PY54; A0A2G3D4N7; I1PXM1; A0A2G3A7G5; A0A2R6QAF8; A0A2G2XE12	I1PXM1 [1-11]	1	1339.7	11
FALSE	High	Unambiguous	MEDYNHELSENSGAHQR	[-].MEDYNHELSENSGAHQR.[R]	1xAcetyl [N-Term]	1xAcetyl [N-Term]	731362002 1xAcetyl [N-Term]	731362002 1xAcetyl [N-Term]	0.00419045	0	0.689	1	1	1	731362002	731362002	731362002 [1-17]	0	2058.86	17
FALSE	High	Selected	MSAIDGATNGGGGGGALIELPHSLSSQQQQQQR	[-].MSAIDGATNGGGGGGALIELPHSLSSQQQQQQR.[Q]	1xAcetyl [N-Term]	1xAcetyl [N-Term]	A0A0K9R6R1 1xAcetyl [N-Term]	A0A0K9R6R1 1xAcetyl [N-Term]	0.190952	0.00652397	0.068	1	1	1	A0A0K9R6R1	A0A0K9R6R1	A0A0K9R6R1 [1-33]	0	3335.6	33
FALSE	High	Unambiguous	MDVGAQYNPR	[-].MDVGAQYNPR.[T]	1xAcetyl [N-Term]	1xAcetyl [N-Term]	1108956625 1xAcetyl [N-Term]	1108956625 1xAcetyl [N-Term]	0.0642931	0.000962316	0.245	1	2	1	1108956625	731348128; 1108956625	1108956625 [1-10]	0	1192.54	10
FALSE	High	Unambiguous	MEAQLVER	[-].MEAQLVER.[L]	1xAcetyl [N-Term]	1xAcetyl [N-Term]	731358704 1xAcetyl [N-Term]	731358704 1xAcetyl [N-Term]	0.177367	0.00596827	0.08	1	2	1	731358704	731358704; A0A0K9R0D8	731358704 [1-8]	0	1017.5	8
FALSE	High	Unambiguous	MESIQQIR	[-].MESIQQIR.[D]	1xAcetyl [N-Term]	1xAcetyl [N-Term]	731320060 1xAcetyl [N-Term]	731320060 1xAcetyl [N-Term]	0.213305	0.00825917	0.05	1	2	1	731320060	731320060; 731320062	731320060 [1-8]	0	1046.53	8
FALSE	High	Unambiguous	MEENSPALNPTSVVVTGTAR	[-].MEENSPALNPTSVVVTGTAR.[E]	1xAcetyl [N-Term]	1xAcetyl [N-Term]	731314455 1xAcetyl [N-Term]	731314455 1xAcetyl [N-Term]	0.000550612	0	1.019	1	1	1	731314455	731314455	731314455 [1-20]	0	2115.04	20
FALSE	High	Unambiguous	MDSDFGIPR	[-].MDSDFGIPR.[EQ]	1xAcetyl [N-Term]	1xAcetyl [N-Term]	Q41140 1xAcetyl [N-Term]; 731314194 1xAcetyl [N-Term]	Q41140 1xAcetyl [N-Term]; 731314194 1xAcetyl [N-Term]	0.106459	0.00224036	0.163	2	46	1	Q41140; 731314194	R0GGR3; A0A087GZQ2; A0A0D3D171; V4M8I3; A0A164YE52; A0A1Q3BDE6; A0A067H0B7; B9H5X2; A0A067KKJ2; A0A2K2BB99; F6I6W5; B9R8U5; V4L4L5; A0A061FEW0; A0A087HIX1; A0A078H4Z3; M4DGV8; D7KTU8; A0A0D3DQP0; A0A2K2BB94; A9PC61; A0A200PS19; A0A2K2AMR0; A0A0K9QFM3; A0A178W4Z8; A0A1X9IUE9; A0A2K2AMQ7; Q9C9K3; A0A1U8AK17; A0A2K2BB91; A0A0D3CBY0; A0A1U8AFE6; M4EAP9; U5GK69; B9GPM4; A0A2C9VY66; A0A2H5N550; A0A067H…	Q41140 [1-9]; 731314194 [1-9]	0	1079.48	9
FALSE	High	Unambiguous	MDLHQHHPHITTPTTNPSPNPNR	[-].MDLHQHHPHITTPTTNPSPNPNR.[T]	1xAcetyl [N-Term]	1xAcetyl [N-Term]	731312502 1xAcetyl [N-Term]	731312502 1xAcetyl [N-Term]	0.000767497	0	0.965	1	1	1	731312502	731312502	731312502 [1-23]	0	2684.27	23
FALSE	High	Unambiguous	MSMLDAFFKGGGGGGGGFR	[-].MSMLDAFFKGGGGGGGGFR.[G]	1xAcetyl [N-Term]	1xAcetyl [N-Term]	A0A1E5VQE6 1xAcetyl [N-Term]	A0A1E5VQE6 1xAcetyl [N-Term]	0.164748	0.0044837	0.092	1	1	2	A0A1E5VQE6	A0A1E5VQE6	A0A1E5VQE6 [1-19]	1	1890.86	19
FALSE	High	Unambiguous	MQNDEGEIMDLYIPR	[-].MQNDEGEIMDLYIPR.[K]	1xAcetyl [N-Term]	1xAcetyl [N-Term]	731327015 1xAcetyl [N-Term]	731327015 1xAcetyl [N-Term]	0.0231625	0	0.411	1	1	1	731327015	731327015	731327015 [1-15]	0	1865.84	15
FALSE	High	Unambiguous	MNHIAGAEEQIVTER	[-].MNHIAGAEEQIVTER.[L]	1xAcetyl [N-Term]	1xAcetyl [N-Term]	731323456 1xAcetyl [N-Term]	731323456 1xAcetyl [N-Term]	0.000717293	0	0.976	1	1	2	731323456	731323456	731323456 [1-15]	0	1739.84	15
FALSE	High	Unambiguous	MDVLYPQSSVSPSSR	[-].MDVLYPQSSVSPSSR.[L]	1xAcetyl [N-Term]	1xAcetyl [N-Term]	731362460 1xAcetyl [N-Term]	731362460 1xAcetyl [N-Term]	0.0186768	0	0.446	1	1	3	731362460	731362460	731362460 [1-15]	0	1694.81	15
FALSE	High	Unambiguous	MSGGPISQDWEPVVIR	[-].MSGGPISQDWEPVVIR.[K]	1xAcetyl [N-Term]	1xAcetyl [N-Term]	A0A1S2YJJ6 1xAcetyl [N-Term]	A0A1S2YJJ6 1xAcetyl [N-Term]	0.133662	0.00292848	0.126	1	1	1	A0A1S2YJJ6	A0A1S2YJJ6	A0A1S2YJJ6 [1-16]	0	1812.89	16
FALSE	High	Unambiguous	SLVANEEFQHILR	[-].SLVANEEFQHILR.[V]	1xAcetyl [N-Term]	1xAcetyl [N-Term]	A0A2R6QE27 1xAcetyl [N-Term]	A0A2R6QE27 1xAcetyl [N-Term]	0.00494739	0	0.662	1	3	6	A0A2R6QE27	S8BSV1; A0A2R6QE27; A0A2R6QU18	A0A2R6QE27 [1-13]	0	1597.83	13
FALSE	High	Unambiguous	MEDASVLQDRDGR	[-].MEDASVLQDRDGR.[F]	1xAcetyl [N-Term]	1xAcetyl [N-Term]	731328129 1xAcetyl [N-Term]	731328129 1xAcetyl [N-Term]	0.013399	0	0.5	1	3	1	731328129	731328129; 731328135; 731328133	731328129 [1-13]	1	1533.7	13
FALSE	High	Unambiguous	MDDVITDLPPPSR	[-].MDDVITDLPPPSR.[F]	1xAcetyl [N-Term]	1xAcetyl [N-Term]	731340280 1xAcetyl [N-Term]	731340280 1xAcetyl [N-Term]	0.0309258	0	0.364	1	3	6	731340280	731340280; A0A022QJN6; A0A2G9I827	731340280 [1-13]	0	1497.73	13
FALSE	High	Unambiguous	LREMSGSNIFAEGDRVEPR	[K].LREMSGSNIFAEGDRVEPR.[D]					0.00448375	0	0.678	1	1	2	731338884	731338884	731338884 [259-277]	2	2163.06	19
FALSE	High	Unambiguous	QNRPIPYWIR	[R].QNRPIPYWIR.[M]					0.201819	0.00652397	0.059	1	64	1	A0A2G2X4L7	M7Y712; A0A0E0HLS5; B6SJ78; A0A2P5XR45; A0A151QQS7; H6UGY5; A0A068U0G2; A0A1R3GUL9; B6SYU3; J3MBT9; S8E016; A0A0D9WML0; I1H0E5; A0A0Q3H8F8; A0A1S3U3K8; A0A1U8H8T2; K7KTF3; A0A1E5WM89; A0A0A9KQW2; A0A287E4D3; M7ZU91; F2DA55; K3YM29; A0A0B2SG69; A0A2K2CYB0; A0A0P0VQP9; A0A068VLX2; A0A0E0L8L6; A0A2G9H071; A0A068U1E6; I1I2J2; M1AUY6; A0A287VW81; A0A287VVZ0; A0A1S4AM54; A0A2H9ZYA5; A0A1D1XV08; A0A1D6H…	A0A2G2X4L7 [119-128]	0	1342.74	10
FALSE	High	Unambiguous	TDALAIASFGSQNPGR	[K].TDALAIASFGSQNPGR.[I]					0.019142	0	0.442	2	5	1	731312085; 731312089	731312085; 731312091; 731312087; 731312093; 731312089	731312085 [176-191]; 731312089 [176-191]	0	1604.8	16
FALSE	High	Unambiguous	ILGLTGPVNSIR	[R].ILGLTGPVNSIR.[Q]					0.050272	0	0.285	1	1	1	731338902	731338902	731338902 [200-211]	0	1239.74	12
FALSE	High	Unambiguous	AVVVHADPDDLGR	[R].AVVVHADPDDLGR.[GDEVA-]					0.00799302	0	0.584	1	79	5	K4AFE1	K4AFR1; H9XW39; A0A0K0NPR2; C5WSP7; A0A1D6JTD7; P93258; A0A1D6JTE3; H6X1L6; A0A2P5BFH4; H6X1L8; A0A1J6IV04; K4BH38; A0A2G5EW51; A0A061F0K6; A0A1R3JCN0; A0A218WMH7; Q5MJ23; G7KPK8; A0A1D6JTE8; A0A1S4D5J3; A0A1R3KKE1; A0A061F0Z0; I3SMT5; A0A200PMW0; A0A0K9R5I0; I1MNV1; 731328264; A0A2I4EL13; A0A1D6JTD8; I1MNV0; H6WEP2; A0A251SFX9; A0A1D6JTE1; B6TAX5; R4LCL6; A4ZYP8; A2IBH0; F1CYZ4; A0A164Y0C2; D6PY…	K4AFE1 [158-170]	0	1363.7	13
FALSE	High	Unambiguous	GLGMHVVAHDPYAPADR	[K].GLGMHVVAHDPYAPADR.[A]					0.0339145	0	0.349	1	8	1	731360225	A0A1Z4EAX4; D8RSY4; A0A2G5CB86; A0A2J6LAE1; W1PJI2; S8DN51; A0A251UU50; 731360225	731360225 [240-256]	0	1805.88	17
FALSE	High	Unambiguous	LLNQDPFHEVRR	[KR].LLNQDPFHEVRR.[KR]					0.116032	0.00257247	0.149	1	11	1	731348116	A0A067KX76; A0A2R6PT65; A0A2R6PV66; A0A0K9Q291; W9QL32; R7W6A0; 731348116; A0A200QEP8; A0A2I4FTM4; 731348118; A0A0K9RH42	731348116 [55-66]	1	1523.81	12
FALSE	High	Unambiguous	LVQTDVPEEDRYGNETVAENTER	[K].LVQTDVPEEDRYGNETVAENTER.[G]					0.00132676	0	0.876	1	1	4	731323808	731323808	731323808 [305-327]	1	2664.24	23
FALSE	High	Unambiguous	IAPSVTEPNFR	[R].IAPSVTEPNFR.[S]					0.141269	0.00292848	0.117	1	1	1	731373300	731373300	731373300 [99-109]	0	1230.65	11
FALSE	High	Unambiguous	NFVPNLPLQR	[R].NFVPNLPLQR.[G]					0.0885226	0.000962316	0.193	1	1	1	1108884323	1108884323	1108884323 [49-58]	0	1197.67	10
FALSE	High	Unambiguous	LASVAAAAGLAR	[K].LASVAAAAGLAR.[E]					0.076375	0.000962316	0.217	1	1	4	731332499	731332499	731332499 [210-221]	0	1070.63	12
FALSE	High	Unambiguous	IASVTGIVTEHQR	[R].IASVTGIVTEHQR.[L]					0.0447279	0	0.304	1	1	3	731352881	731352881	731352881 [50-62]	0	1410.77	13
FALSE	High	Unambiguous	TGRFNTTTEEGSSDLQLER	[K].TGRFNTTTEEGSSDLQLER.[I]					0.00333761	0	0.726	1	1	3	731360530	731360530	731360530 [33-51]	1	2141.01	19
FALSE	High	Unambiguous	MDFPHRPLTGAPR	[K].MDFPHRPLTGAPR.[M]					0.11391	0.00257247	0.152	1	1	3	731330523	731330523	731330523 [415-427]	0	1494.76	13
FALSE	High	Unambiguous	TSDRPFDDGYVGYDPNLPSQR	[R].TSDRPFDDGYVGYDPNLPSQR.[F]					0.00591336	0	0.633	1	1	9	731350516	731350516	731350516 [16-36]	0	2399.09	21
FALSE	High	Unambiguous	LVTSPTVGSFR	[K].LVTSPTVGSFR.[R]					0.0337065	0	0.35	1	1	3	A0A0J8BHG7	A0A0J8BHG7	A0A0J8BHG7 [190-200]	0	1163.64	11
FALSE	High	Unambiguous	EREEREALGALPLYQR	[R].EREEREALGALPLYQR.[ST]					0.0012173	0	0.89	1	2	7	731320240	731320240; A0A200PQK9	731320240 [110-125]	2	1930.01	16
FALSE	High	Unambiguous	VSFGTVQESRPGLIPRPESR	[R].VSFGTVQESRPGLIPRPESR.[D]					0.103235	0.00224036	0.168	1	1	1	731327024	731327024	731327024 [38-57]	0	2212.18	20
FALSE	High	Unambiguous	FTSFPERPPSQSGAFDDVRGTEAMDRPR	[R].FTSFPERPPSQSGAFDDVRGTEAMDRPR.[S]					0.0627308	0.00054243	0.249	1	1	5	731342204	731342204	731342204 [465-492]	1	3153.48	28
FALSE	High	Unambiguous	VAGVDDVTGEPLIQR	[K].VAGVDDVTGEPLIQR.[K]					0.00120984	0	0.891	1	2	2	731333772	A0A1S3UIH2; 731333772	731333772 [174-188]	0	1568.83	15
FALSE	High	Unambiguous	GNSVVTVEALEPVAR	[R].GNSVVTVEALEPVAR.[AS]					0.018223	0	0.45	1	5	2	731345022	S8DHJ9; A0A251U6T7; A0A022RE42; A0A068V4I7; 731345022	731345022 [64-78]	0	1540.83	15
FALSE	High	Unambiguous	ILGVDWTR	[R].ILGVDWTR.[N]					0.221323	0.00972005	0.044	1	1	1	731314139	731314139	731314139 [174-181]	0	959.531	8
FALSE	High	Unambiguous	SYELPDGQVITIGNER	[K].SYELPDGQVITIGNER.[F]					0.0405362	0	0.32	2	49	10	F2D4P0; A0A0D6QT83	A0A2G9H4B2; A0A0U3F6M9; A0A1D1YV12; Q96406; A0A2C9VDH8; D6C5B7; A0A1D1Z707; Q0MTA8; A0A1D1YP48; A0A1J3DRQ5; A0A0U2VAX0; A0A0D6QUQ0; A0A022QZU8; S8DD77; G3EAC0; F2DR86; D5K0Z6; O65316; D5K0Z5; Q9FRT4; F2D4P0; A0A0U2U508; A0A1J3K0Z2; A0A2P4MJ31; Q002L8; A0A068TXK9; F2DZM0; A0A2P4M295; A0A1D1YJ29; B4G1E1; A0A0D6QT83; A0A1C9ULP8; Q002L7; A0A1D1ZF17; F2E0T8; A0A0U3FMR1; G3EAC1; A0A1L5JKA9; A0A2H3X9F7;…	F2D4P0 [240-255]; A0A0D6QT83 [239-254]	0	1790.89	16
FALSE	High	Rejected	TIALGLDPDQEVR	[R].TIALGLDPDQEVR.[L]					0.176279	0.00596827	0.081	0	1	1		A0A0K9QAY5		0	1426.75	13
FALSE	High	Unambiguous	TQEQAASLGIPLSVLDDHPR	[R].TQEQAASLGIPLSVLDDHPR.[I]					0.000607548	0	1.003	1	1	5	731328476	731328476	731328476 [117-136]	0	2147.11	20
FALSE	High	Unambiguous	DYFGAHTYER	[R].DYFGAHTYER.[ITVA]					0.0337065	0	0.35	2	249	3	A0A2H5P1K5; 731332004	A0A2G9H6Z3; A0A2I0ATH4; A0A2N9H1M7; A0A218VVQ8; A0A022RJX5; K3XWM2; A0A1U8NRN0; A0A2G2VKI7; W8NX13; A0A0D3GBZ0; A0A1S3CBC8; A0A251LQ27; A0A1D6LJP6; O81237; A0A2K3PH80; A0A0C9RJ42; W5HGA3; A0A1J3GKN0; A0A1D5X0G6; A0A1J3CTD8; A0A2H3XTI5; I1N6I4; E3V1H9; A0A078HB53; W8SJN1; A0A1Y1HRT8; A0A0A9GAI5; A0A1D6N1Z8; A0A0D3CN92; A0A1Q3CIX8; A0A2I4EBN6; A0A2R6WV15; A0A0A9IRS2; M0S8Z4; A0A2P2MC56; A0A2P5XPH8;…	A0A2H5P1K5 [499-508]; 731332004 [546-555]	0	1258.55	10
FALSE	High	Unambiguous	ISVIQAPLQGPGMSQR	[R].ISVIQAPLQGPGMSQR.[T]					0.0554704	0.00054243	0.269	1	1	1	731342327	731342327	731342327 [387-402]	0	1681.91	16
FALSE	High	Unambiguous	AAVPSGASTGIYEALELR	[R].AAVPSGASTGIYEALELR.[D]					0.0112794	0	0.528	2	139	1	G9JNH0; I1N1N3	A0A1Y1I6W3; A0A2H3X5J1; A0A0D2QBD2; A0A067FQD2; A0A251QMS0; A0A067JHW3; G9JNH0; A0A1R3ITI3; I3SYN9; A0A1J3HH62; A0A1U8L194; A0A1S4BCN3; A0A1U8E6P3; A0A2G5E2G1; A0A2I0AWP0; V4UV38; A0A2P4N7K0; A0A1J6IAK4; A0A0A0KIK3; A0A1J3ENR5; P26300; A0A251RZF8; M5XJJ3; A0A2P5WIY0; A0A142K3L6; A0A067JER2; A8IMB0; A0A2J6LY18; A0A2G3BFD0; A0A0D2S420; A0A1R3HD25; A0A2H3Y029; A0A1Q3B137; A0A103YDP3; A0A251UJ14; A0A…	G9JNH0 [35-52]; I1N1N3 [92-109]	0	1804.94	18
FALSE	High	Unambiguous	VAEHAFQYATAHGR	[R].VAEHAFQYATAHGR.[D]					0.000712895	0	0.977	1	1	2	731345750	731345750	731345750 [176-189]	0	1557.76	14
FALSE	High	Unambiguous	GGSPYGAGVFAGDGTR	[R].GGSPYGAGVFAGDGTR.[EGQ]					0.199352	0.00652397	0.061	1	32	1	A0A1J7GXG6	W1NDV8; A0A1J7GXG6; W9RZW9; A0A2G9GUC2; A0A1U7ZAU5; A0A2G5EA15; A0A2P5BC34; A0A2R6R5W3; A0A164UGR4; A0A2R6S2F3; A0A151TI59; V7CHY9; A0A0K9RNC5; A0A1U8A1G7; A0A1J7FXJ7; M5VQR4; M0TML4; S8DU99; A0A0S3T4E1; M0SLX3; A0A218WQ98; A0A2K3N6T4; A0A1Q3B1W0; A0A022QLU8; M0RZS5; F6GWY9; A0A2P5FXS7; A0A067GLC0; 731376847; A0A200R7H0; A0A1S3VNB5; V4UHZ5	A0A1J7GXG6 [355-370]	0	1468.68	16
FALSE	High	Unambiguous	VDLAVDGMNPPHSHPR	[R].VDLAVDGMNPPHSHPR.[A]					0.0320883	0	0.358	1	1	1	731335269	731335269	731335269 [135-150]	0	1741.84	16
FALSE	High	Unambiguous	TVNDGYVAGVHRPYR	[R].TVNDGYVAGVHRPYR.[N]					0.109111	0.00224036	0.159	1	1	1	731332314	731332314	731332314 [57-71]	0	1703.86	15
FALSE	High	Unambiguous	VRPPAHLVDDQYR	[R].VRPPAHLVDDQYR.[Q]					0.0217809	0	0.421	1	1	4	731350566	731350566	731350566 [144-156]	0	1565.82	13
FALSE	High	Unambiguous	DASHLLSLQQGAGSR	[K].DASHLLSLQQGAGSR.[T]					0.154921	0.00409645	0.102	1	4	2	731373639	731373639; 1108864194; 731373642; A0A0K9RII2	731373639 [760-774]	0	1539.79	15
FALSE	High	Unambiguous	RVSSGVNQAAGFMGR	[R].RVSSGVNQAAGFMGR.[S]					0.0196187	0	0.438	1	1	1	731322733	731322733	731322733 [112-126]	1	1536.77	15
FALSE	High	Unambiguous	VIAEDAGADDEPDGNQHVTAR	[R].VIAEDAGADDEPDGNQHVTAR.[L]					0.000422663	0	1.062	1	1	3	731363127	731363127	731363127 [120-140]	0	2179.99	21
FALSE	High	Unambiguous	VQVIEQYGPYGSQLPENYR	[K].VQVIEQYGPYGSQLPENYR.[V]					0.0407863	0	0.319	1	1	1	731337603	731337603	731337603 [8-26]	0	2240.1	19
FALSE	High	Unambiguous	TDDGSQEYAEFLHMPNR	[K].TDDGSQEYAEFLHMPNR.[R]					0.047565	0	0.294	1	1	2	731360727	731360727	731360727 [84-100]	0	2009.87	17
FALSE	High	Unambiguous	LSELDNHLNLPARPR	[R].LSELDNHLNLPARPR.[M]					0.170941	0.00563879	0.086	1	2	1	731343067	731343069; 731343067	731343067 [603-617]	0	1744.95	15
FALSE	High	Unambiguous	AHIQFPVYHTVNEAGPR	[R].AHIQFPVYHTVNEAGPR.[D]					0.082732	0.000962316	0.204	1	1	1	731316020	731316020	731316020 [42-58]	0	1935.98	17
FALSE	High	Unambiguous	DGSAAAEPAPPPPRPVQGYGPIGGFPR	[R].DGSAAAEPAPPPPRPVQGYGPIGGFPR.[G]					0.000407351	0	1.068	1	1	1	731315828	731315828	731315828 [470-496]	0	2658.34	27
FALSE	High	Unambiguous	HVDGALLALRQPR	[K].HVDGALLALRQPR.[K]					0.222688	0.00972005	0.043	1	1	2	731333018	731333018	731333018 [120-132]	1	1445.83	13
FALSE	High	Unambiguous	TGNVITEVSEGDAEDINRAVSAAR	[R].TGNVITEVSEGDAEDINRAVSAAR.[I]					0.000567806	0	1.014	1	1	1	731342801	731342801	731342801 [94-117]	1	2474.21	24
FALSE	High	Unambiguous	TMPVEDHVEPSYFEMPSVSAETSR	[K].TMPVEDHVEPSYFEMPSVSAETSR.[S]					0.00154727	0	0.851	1	1	1	731327209	731327209	731327209 [331-354]	0	2725.21	24
FALSE	High	Unambiguous	VFGTEHSHILR	[K].VFGTEHSHILR.[VS]					0.0138174	0	0.495	1	43	4	1108966238	Q6SJP5; D7US90; A0A2G9H7N8; A0A151SSH8; K7MJY8; A0A1L1W296; C0SW06; Q8GTA3; M1B218; Q1PCS4; A0A0A0LX20; Q84UC3; Q01390; K9K7W3; A0A1U7XSQ6; P49039; Q9SBL8; M1B216; O82691; 1108966230; 1108966238; A0A1S3YFR7; A0A2I0L5Z7; A0A218WPE0; P13708; E0Z1D0; A0A218XH59; A0A1S3BR67; A0A0R0FJF5; M1B217; G4WJT1; A0A1S3US70; A0A1S3ZPV3; A0A0U1ZUF4; Q8W402; Q50JD9; V7C8M2; A0A1J6KBJ6; A0A068TN99; A0A0K9R3G5; Q9L…	1108966238 [351-361]	0	1295.69	11
FALSE	High	Unambiguous	VNPSGDARPPPLGGLSSLPEMDR	[R].VNPSGDARPPPLGGLSSLPEMDR.[M]					6.63799e-05	0	1.363	1	1	7	731357482	731357482	731357482 [345-367]	0	2362.18	23
FALSE	High	Unambiguous	IDYGLFGLNPPHTHPR	[R].IDYGLFGLNPPHTHPR.[S]					0.104513	0.00224036	0.166	1	1	1	R7WAV1	R7WAV1	R7WAV1 [8-23]	0	1833.94	16
FALSE	High	Unambiguous	FRREPDLNPEVVQR	[R].FRREPDLNPEVVQR.[V]					0.163738	0.0044837	0.093	1	4	1	A0A0K9REZ8	M0TVP6; A0A0K9REZ8; 731327211; M0TMG5	A0A0K9REZ8 [116-129]	2	1754.93	14
FALSE	High	Unambiguous	ESTGIVGLDVVPNAR	[K].ESTGIVGLDVVPNAR.[E]					0.0186768	0	0.446	1	4	1	A0A2K1KJE1	731363183; A9TI76; A0A1Y1I1B4; A0A2K1KJE1	A0A2K1KJE1 [132-146]	0	1526.82	15
FALSE	High	Unambiguous	SILGNPQHPVPIHAR	[R].SILGNPQHPVPIHAR.[G]					0.0032968	0	0.728	1	7	2	731371796	731371796; 731371800; 731371812; 731371808; 731371815; 731371804; 1108863585	731371796 [812-826]	0	1635.91	15
FALSE	High	Unambiguous	LDFAPYGVNPPHIHPR	[R].LDFAPYGVNPPHIHPR.[G]					0.0709414	0.000962316	0.229	1	7	2	A0A2H3ZYV6	A0A2H3XA13; A0A2H3ZYV6; A0A2H3XA90; A0A2H3X5Y0; A0A2H3XAA4; A0A2H3ZYX6; A0A2H3X8E5	A0A2H3ZYV6 [96-111]	0	1829.94	16
FALSE	High	Unambiguous	SAFLDALNHYPQFGTVGSTDDSRR	[R].SAFLDALNHYPQFGTVGSTDDSRR.[E]					0.000184253	0	1.197	1	1	3	731352259	731352259	731352259 [99-122]	1	2654.26	24
FALSE	High	Rejected	VDDHIGVAIAGLTADGR	[K].VDDHIGVAIAGLTADGR.[V]					0.0842726	0.000962316	0.201	0	116	1		A0A2K3PHD2; A0A0D3E636; V4L3A3; A0A1S4ANT6; A0A078IR54; R0EXH5; A0A2C9VWM1; A0A2H3XK98; B8LS25; A0A1J3G6Y8; A0A1S2Y687; M5XZ63; M0ZWK0; V4TF24; Q93X35; A0A1J6I7H5; A0A200R7P1; A0A2P5YQJ6; A0A022R263; A0A0K9RGG6; M4DC55; A0A1J7ID12; A0A2P4H819; A0A218WRQ4; A0A0D3DK24; A0A067L355; A0A1R3IY94; A0A1J3HNL8; A0A067GYC0; A0A1J3EB02; A0A1J3HH58; A0A2I0WP78; A0A1J3IIX2; A0A0C9RYN2; A0A1U8KY15; B8LP35; A0A…		0	1679.87	17
FALSE	High	Unambiguous	IRGNSGDQWSDLLGYAIGQR	[R].IRGNSGDQWSDLLGYAIGQR.[S]					0.00361541	0	0.713	1	1	4	731354034	731354034	731354034 [226-245]	1	2206.1	20
FALSE	High	Unambiguous	VLADDPSFR	[K].VLADDPSFR.[Q]					0.176279	0.00596827	0.081	1	3	1	731337647	1108929373; 731337647; A0A0J8DSE5	731337647 [207-215]	0	1019.52	9
FALSE	High	Unambiguous	SPSEDRIFASPLAR	[K].SPSEDRIFASPLAR.[K]					0.01926	0	0.441	1	2	3	731361346	731361348; 731361346	731361346 [250-263]	1	1545.8	14
FALSE	High	Unambiguous	LGTAAELPYR	[R].LGTAAELPYR.[M]					0.0600875	0.00054243	0.256	1	1	3	731360672	731360672	731360672 [82-91]	0	1090.59	10
FALSE	High	Unambiguous	LLDQTQPISER	[R].LLDQTQPISER.[F]					0.026682	0	0.388	1	7	2	A0A251TFC2	A0A2J6KG76; A0A2G5DP68; A0A2G5DP55; 731336366; A0A2G5DP46; A0A103XP32; A0A251TFC2	A0A251TFC2 [22-32]	0	1299.69	11
FALSE	High	Unambiguous	TLGYTEPDPRDDLGGMDVAR	[K].TLGYTEPDPRDDLGGMDVAR.[K]					0.0405362	0	0.32	1	1	1	731348491	731348491	731348491 [220-239]	1	2178.01	20
FALSE	High	Unambiguous	FLMEHGVDR	[K].FLMEHGVDR.[K]					0.0683713	0.000962316	0.235	1	1	3	731329677	731329677	731329677 [816-824]	0	1103.53	9
FALSE	High	Unambiguous	RGYGGPPPPMGPPR	[R].RGYGGPPPPMGPPR.[R]					0.000441256	0	1.055	1	1	1	731353802	731353802	731353802 [188-201]	1	1435.73	14
FALSE	High	Unambiguous	LHSLIDEPVDHQR	[K].LHSLIDEPVDHQR.[L]					0.00652483	0	0.617	1	1	6	731363974	731363974	731363974 [31-43]	0	1558.8	13
FALSE	High	Unambiguous	FGPQPMAVPPVQQMSR	[K].FGPQPMAVPPVQQMSR.[I]					0.00370545	0	0.709	1	18	1	A0A199VI60	K4AE83; A0A2P5YWR0; A0A199VI60; A0A0B0NL25; A0A0B0ND90; A0A251VAX5; A0A0D2R4G5; A0A0A9DJI6; A0A199VIW4; 731331035; A0A2P5QSA9; A0A2P5CPG1; A0A2P5EG78; A0A0D2PBM5; K4AD93; A0A1S3UWN3; A0A0A9UQG3; A0A0D2RZ63	A0A199VI60 [250-265]	0	1769.88	16
FALSE	High	Unambiguous	SWTGTIIGPHNSVHEGR	[R].SWTGTIIGPHNSVHEGR.[I]					0.0073336	0	0.598	1	62	2	A0A0E0EQH2	A0A1S4A2G6; Q3HVN0; A0A124SBG8; A0A022RE65; A0A1D1XXD5; M1CQK8; A0A0E0EQH2; A0A2R6Q405; 731377923; A0A2G9GBZ3; A0A0K9QNC8; A0A2G3AMR0; K4ASY4; A0A1U8AKU9; A0A0V0HG08; A0A161ZV81; Q3LVP4; A0A199VPJ3; Q3LVQ8; A0A1U7VZB4; A0A0K9RBB0; A0A0C9RS33; A0A218X235; A0A0D6QRT3; A0A1S4DFB8; A0A2G2VV62; A0A200Q9H7; A0A164WKS2; A6N196; A0A068UQ11; A0A200Q7P5; K4D399; A0A1U7Z6C9; A0A0E0LZG4; A0A2H3XGQ7; J3MW95; …	A0A0E0EQH2 [108-124]	0	1847.91	17
FALSE	High	Unambiguous	SDDTNMAGDDGVREVVR	[K].SDDTNMAGDDGVREVVR.[E]					0.0215147	0	0.423	1	1	2	731336938	731336938	731336938 [23-39]	1	1835.82	17
FALSE	High	Unambiguous	AIMAQYMPLDSQTEIPNHSDDRA	[R].AIMAQYMPLDSQTEIPNHSDDRA.[-]					0.00210433	0	0.801	1	1	2	731352092	731352092	731352092 [611-633]	1	2603.19	23
FALSE	High	Unambiguous	HLNITLSR	[K].HLNITLSR.[S]					0.210697	0.00721273	0.052	1	5	1	731359783	A0A0K9RV92; A0A0K9R3U5; O50047; O49045; 731359783	731359783 [341-348]	0	953.553	8
FALSE	High	Unambiguous	LLNRNQGREDDNLETIR	[R].LLNRNQGREDDNLETIR.[K]					0.00411384	0	0.692	1	14	18	731315844	A0A1U8N791; A0A061FQ73; A0A2P5XC50; A0A2N9HSQ3; A0A2G9G4U3; A0A0D2V051; A0A0B0PT82; A0A1U8J6X6; A0A059CEB7; A0A059B8S0; S8EGW7; 731315844; A0A2P5RH65; S8CW51	731315844 [138-154]	2	2056.05	17
FALSE	High	Unambiguous	NQIDEIVLVGGSTR	[K].NQIDEIVLVGGSTR.[I]					0.12803	0.00257247	0.133	1	71	2	731321538	A0A067GMJ3; A0A199V7A7; M1BQB7; A0A2P2M7P8; Q42434; A0A2K2B732; A0A2G3CX17; A0A2P2M7N9; Q587K1; A0A067KI98; A0A059C3Q0; A0A2R6PHR4; A0A0L9TH12; 731321538; A0A2H5NH09; A0A072TV12; A0A067GMT2; A0A1S3YJK2; M1AWJ2; A0A2I4FU77; M0U2X8; B9RYP6; A0A0L9TGV7; A0A2N9H883; A0A1S3Y1G1; A0A1U7W404; A0A218XJZ9; A0A1S4B7X5; A0A067JZ43; M1BLB0; Q9FSY7; A0A2R6QMS4; A0A1S4B881; A0A1J6I503; A0A067GDB6; A0A2K2BUL0; …	731321538 [360-373]	0	1500.8	14
FALSE	High	Unambiguous	LRETTLAHDDEISR	[K].LRETTLAHDDEISR.[N]					0.000993704	0	0.923	1	4	2	731315358	A0A1D1YVN5; 731315358; A0A0K9QPL3; A0A200QNR9	731315358 [452-465]	1	1655.83	14
FALSE	High	Selected	IDDHVGVAIAGLTADGR	[K].IDDHVGVAIAGLTADGR.[V]					0.101348	0.00224036	0.171	1	1	1	A0A1D1XNG3	A0A1D1XNG3	A0A1D1XNG3 [94-110]	0	1679.87	17
FALSE	High	Unambiguous	SSDDLFSAR	[R].SSDDLFSAR.[R]					0.082732	0.000962316	0.204	1	1	2	731338882	731338882	731338882 [114-122]	0	997.459	9
FALSE	High	Unambiguous	FAELTMAHR	[R].FAELTMAHR.[G]					0.137836	0.00292848	0.121	1	3	4	A0A1S2Y747	A0A1S2Y747; A0A1J6KTE5; 731322412	A0A1S2Y747 [155-163]	0	1075.54	9
FALSE	High	Unambiguous	GNPTVEADVHLDDGTYAR	[R].GNPTVEADVHLDDGTYAR.[A]					0.000340809	0	1.097	1	1	2	731345370	731345370	731345370 [17-34]	0	1929.89	18
FALSE	High	Unambiguous	LDLGINGVIPVHSHR	[R].LDLGINGVIPVHSHR.[T]					0.00370545	0	0.709	1	2	10	731320503	731320503; 731320501	731320503 [91-105]	0	1626.91	15
FALSE	High	Unambiguous	GVVDSEDLPLNISR	[KR].GVVDSEDLPLNISR.[E]					0.00602347	0	0.63	1	51	18	A0A2P6VPC9	Q002I5; A9TFL9; Q002I6; F2DEU3; A0A2P6VPC9; F1T1D5; Q002J2; A0A0D6QY82; A0A1J3EJU3; G5DCB6; A0A059LNH8; A0A0D2KKF3; F2DJP4; F1T197; A0A2P6TNV7; A0A1D1ZQI3; A0A250XTY8; Q002I9; A0A2R6W912; A0A1J3DC81; A0A0C9QP24; H1ZY28; Q002J0; F2E7K9; Q002I7; F1T1E9; F1T198; T1N9S2; A0A250WSM0; A9SIS2; A0A176VW23; F1T1E8; A9TFM2; Q002J3; Q002I8; A0A1J3K078; A9TQU1; A9TLH3; A0A2P6TNV3; A0A1J3F9U0; A0A2R6XUI6; C6L…	A0A2P6VPC9 [527-540]	0	1513.79	14
FALSE	High	Unambiguous	VALPPGVVPPPARPR	[K].VALPPGVVPPPARPR.[G]					0.0142489	0	0.49	1	1	1	731326089	731326089	731326089 [124-138]	0	1522.92	15
FALSE	High	Unambiguous	LDYAPHGLNPPHTHPR	[R].LDYAPHGLNPPHTHPR.[A]					0.0792459	0.000962316	0.211	1	5	2	I1P0J6	A0A0D3F5B0; I1P0J6; A0A0D9YSG4; B3TLX7; A0A2G5DXF6	I1P0J6 [104-119]	0	1821.91	16
FALSE	High	Unambiguous	IDFAPNGGLNPPHTHPR	[R].IDFAPNGGLNPPHTHPR.[AG]					0.00442893	0	0.68	1	17	4	A0A251KV71	A0A1Q3BPH0; A0A2C9VH55; A0A251KEB5; 731322791; Q4VSU6; A0A2C9VHV2; A0A1Q3BPX6; A0A2C9VGA6; A0A2P6SH12; 731354661; A0A2C9VFY6; A0A2C9VFW8; A0A2C9VFW1; A0A1Q3BP02; A0A2C9VG02; A0A2C9VFX6; A0A251KV71	A0A251KV71 [102-118]	0	1839.92	17
FALSE	High	Unambiguous	LDIGVGGVVPIHSHR	[R].LDIGVGGVVPIHSHR.[V]					0.125689	0.00257247	0.136	1	4	1	A0A0K9RH28	A0A0K9RH28; 731372221; 731372203; A0A0K9QX50	A0A0K9RH28 [95-109]	0	1555.87	15
FALSE	High	Unambiguous	VEYGDGTTAIDPSDVHAISR	[R].VEYGDGTTAIDPSDVHAISR.[Y]					0.00164541	0	0.841	1	1	1	731314194	731314194	731314194 [36-55]	0	2103	20
FALSE	High	Unambiguous	TVPHLADAIHAAVTR	[RK].TVPHLADAIHAAVTR.[VAMFSLGICT]					0.00473892	0	0.669	1	55	5	731353768	A0A0A0LEK8; A0A2G2YXE2; A0A2H3XVK3; Q40107; A0A061GIL3; A0A2P2JCL2; A0A067KPI2; A0A2P5R8U3; A0A059CPR9; A0A1R3J863; A0A2P5G1K1; A0A2P5DTB6; A0A2I0AZS1; A0A2C9W3S2; A0A0K9QHH4; D7SUD7; A0A1R3GUT7; A0A2P5Y408; B9RKN9; A0A200RCC2; A0A022QRX8; A0A2I4DX89; D7TBL7; B9RS47; A0A1U8IX63; Q43781; A0A0B0PBJ0; A0A2C9W747; A0A0B0PHJ6; A0A2C9W6D1; A0A2G5FAD2; A0A2P5XZ31; A0A067KGW9; 731353768; A0A0D2PTZ8; A0A1…	731353768 [389-403]	0	1571.87	15
FALSE	High	Unambiguous	IDFGPGGLNPPHTHPR	[R].IDFGPGGLNPPHTHPR.[A]					0.00154727	0	0.851	1	1	13	731337309	731337309	731337309 [98-113]	0	1711.87	16
FALSE	High	Unambiguous	ATRPPLQPIDPLSR	[K].ATRPPLQPIDPLSR.[F]					0.058989	0.00054243	0.259	1	1	2	731360811	731360811	731360811 [562-575]	0	1560.89	14
FALSE	High	Unambiguous	TVDVEELTVEER	[K].TVDVEELTVEER.[N]					0.0343342	0	0.347	2	91	1	W9RXJ7; 731367897	A0A2J6M140; A0A2G3D1U8; Q0J5J5; B6RF02; A0A0K0MFT8; E3VVV8; A0A2G5D8X9; A0A2G3A4B6; A0A2N9GHG8; D4P505; Q5XPI0; C5YHK9; B6SHK4; B6SRI4; A0A2I0AZS6; A0A0B0P5X0; E3U8N9; F6MFF1; B5M1Y0; A0A1S3C1Y8; A0A199V114; A0A059ADY5; A0A0A7A5H5; A0A1Q3C6A7; A9NKY2; Q75ZE0; A0A2P2KCL4; A0A1Z1B8M3; Q5UFR1; U5CX75; A0A200Q3I2; A0A2I0X9A6; A0A1D6LLA1; M5XDY9; Q75ZD9; H6TNP2; A0A0D3H0H6; B6U951; B6SHF0; A0A1E5WFU1;…	W9RXJ7 [136-147]; 731367897 [37-48]	0	1418.7	12
FALSE	High	Unambiguous	LWDLAAGTTAR	[R].LWDLAAGTTAR.[R]					0.0362882	0	0.338	1	2	3	A0A0K9RIC1	731334235; A0A0K9RIC1	A0A0K9RIC1 [89-99]	0	1174.62	11
FALSE	High	Unambiguous	TSDGTIVLVDEVHTPDSSR	[K].TSDGTIVLVDEVHTPDSSR.[Y]					0.00973153	0	0.552	1	2	1	731357849	731357849; A0A0K9RXH8	731357849 [294-312]	0	2027.99	19
FALSE	High	Unambiguous	MHGGGPQVVAGRPLDR	[K].MHGGGPQVVAGRPLDR.[A]					0.0117755	0	0.521	1	1	3	731325461	731325461	731325461 [407-422]	0	1646.85	16
FALSE	High	Unambiguous	LDIGVGGAVPIHSHR	[R].LDIGVGGAVPIHSHR.[A]					0.0197397	0	0.437	1	2	3	A0A0J8DZA4	A0A0J8DZA4; A0A0K9QG49	A0A0J8DZA4 [93-107]	0	1527.84	15
FALSE	High	Unambiguous	ISASMLQDAVSR	[R].ISASMLQDAVSR.[G]					0.00860522	0	0.572	1	2	3	731344593	731344593; 731344595	731344593 [154-165]	0	1277.65	12
FALSE	High	Unambiguous	FTPQEIASLQAGGNER	[K].FTPQEIASLQAGGNER.[A]					0.00689617	0	0.608	1	3	1	A0A0K9QNC5	A0A0K9QNC5; 1108969631; 731353637	A0A0K9QNC5 [68-83]	0	1717.85	16
FALSE	High	Unambiguous	VETMLGDTAIAVHPDDAR	[R].VETMLGDTAIAVHPDDAR.[Y]					0.00221045	0	0.793	1	7	2	731351635	A0A0K9QDB7; 731351635; D7L7D0; 731367707; A0A0D3D6Y9; D7L6V8; A0A022R6F2	731351635 [330-347]	0	1910.93	18
FALSE	High	Unambiguous	IDFAPYGGLNAPHTHPR	[R].IDFAPYGGLNAPHTHPR.[A]					0.000156063	0	1.224	1	1	16	731354659	731354659	731354659 [103-119]	0	1862.93	17
FALSE	High	Unambiguous	TSLPYEPVYSDGQAR	[K].TSLPYEPVYSDGQAR.[F]					0.0143368	0	0.489	1	2	4	A0A022RUV0	A0A022RUV0; 731374883	A0A022RUV0 [363-377]	0	1682.8	15
FALSE	High	Unambiguous	NASYGALSDHQFMRPR	[R].NASYGALSDHQFMRPR.[A]					0.00138512	0	0.869	1	2	2	731323657	731323657; A0A0K9QZ74	731323657 [359-374]	0	1849.88	16
FALSE	High	Unambiguous	VDFAPYGLNTPHLHPR	[R].VDFAPYGLNTPHLHPR.[G]					0.00342073	0	0.722	1	5	7	731312085	731312085; A0A0K9R1W1; 731312087; 731312093; A0A0K9RC10	731312085 [111-126]	0	1833.94	16
FALSE	High	Unambiguous	ILGEEHYNTAR	[R].ILGEEHYNTAR.[G]					0.138686	0.00292848	0.12	1	2	1	A0A2P4LXF3	A0A2P4LXF3; A0A161X8F2	A0A2P4LXF3 [662-672]	0	1302.64	11
FALSE	High	Unambiguous	GGFSFGGIGGGGSGAATGR	[R].GGFSFGGIGGGGSGAATGR.[S]					0.0017178	0	0.834	1	2	2	Q20CD6	731320170; Q20CD6	Q20CD6 [109-127]	0	1569.74	19
FALSE	High	Unambiguous	RFQQVYVAEPSVPDTISILR	[R].RFQQVYVAEPSVPDTISILR.[G]					0.0002445	0	1.151	1	43	3	731366669	A0A1S4D6P6; A0A2R6PCN2; A0A1J3J210; A0A1S2YRA1; R0I6C7; A0A2G5DWL5; A0A0A0LQL1; A0A0V0IVK6; A0A2K1XIJ9; A0A2G3A1Z9; A0A0D3CWP6; M1CAJ2; 731366669; J3M8Y7; A5BT43; D7MGY0; A0A1U7XPT0; A0A072UQA8; 731366671; A0A059A5G2; A0A2I0WWG8; D7KS08; K4BL25; A0A2R6QH73; F6GT15; C7FB07; D7MGY3; A0A059AY65; V4M9A1; Q3L1D0; P42730; A0A072USG1; A0A1S3BKA9; A0A2K1XIK0; A0A1J6IIQ4; A0A178W7U9; A0A022Q6H9; M5WXN8; A…	731366669 [334-353]	1	2318.25	20
FALSE	High	Unambiguous	YQGVVIPEAYER	[R].YQGVVIPEAYER.[L]					0.0175628	0	0.456	1	21	3	731313530	A0A0V0IJY0; K4BDH9; A0A022RXL2; A0A2G2XI79; A0A059APW9; 731313530; A0A059AR48; A0A1S3WX25; P37830; Q9ZSR1; A0A1S4DMZ3; A0A059AQC7; O65854; M1BT30; F2Z9R1; A0A2G3DAB9; A0A1U7W820; A0A1J6INV6; Q2XTC4; O65855; A0A022R469	731313530 [434-445]	0	1423.72	12
FALSE	High	Unambiguous	IILLRYFNPVGAHPSGHIGEDPSGTPNNLMPYVQQVAVGR	[K].IILLRYFNPVGAHPSGHIGEDPSGTPNNLMPYVQQVAVGR.[R]					0.00249977	0	0.773	1	1	1	731330715	731330715	731330715 [176-215]	1	4314.22	40
FALSE	High	Unambiguous	LNDLEQNAVPSLR	[R].LNDLEQNAVPSLR.[K]					0.013154	0	0.503	1	1	1	731348808	731348808	731348808 [104-116]	0	1468.78	13
FALSE	High	Unambiguous	NHFIEGGDAGNRENFINELIR	[R].NHFIEGGDAGNRENFINELIR.[R]					0.00814186	0	0.581	1	2	1	731335174	A0A0J8BDD7; 731335174	731335174 [221-241]	1	2415.18	21
FALSE	High	Unambiguous	AVDSLVPIGR	[K].AVDSLVPIGR.[G]					0.0675355	0.000962316	0.237	1	254	4	E6ZE62	D0PPI9; I1TKY3; Q5VL80; A0A2L0V1K4; B9UZD6; D0PPL1; H9LV36; Q5S7Z5; I1TKW6; Q5S820; U5HSR4; E5DKE3; M9W8R4; Q09R44; Q2QKS8; B2LHP3; B2LHQ9; A0A0G3B880; Q3ZML8; Q3ZMK6; B2LHT7; E5DK64; B0FA48; Q09R45; R4I973; B2LHT0; A0A1B1LNE5; Q5VL96; Q5S804; A0A0X9RV75; E5DKJ4; E5DK22; A0A0G3BDM7; G4Y9N6; A7KBD8; P26854; T1VY35; Q9T687; Q8SIG2; E5DKK9; H9LV38; A0A193KRU4; A0A2H4V4D8; Q9T731; R4I9G1; Q8SID2; Q6W…	E6ZE62 [154-163]	0	1026.59	10
FALSE	High	Unambiguous	LDFLPSGFIPPHLHPR	[R].LDFLPSGFIPPHLHPR.[G]					0.132028	0.00257247	0.128	1	1	1	A0A022REG2	A0A022REG2	A0A022REG2 [97-112]	0	1843	16
FALSE	High	Unambiguous	LAGLIPVHPGIVR	[K].LAGLIPVHPGIVR.[A]					0.0705065	0.000962316	0.23	1	1	2	731319984	731319984	731319984 [195-207]	0	1341.84	13
FALSE	High	Unambiguous	MLSPHILGEEHYNTAR	[R-].MLSPHILGEEHYNTAR.[G]					0.000420072	0	1.063	2	98	18	731341013; A0A175YRR8	D7M1G9; A0A0D2VYM2; A0A061E5Q6; A0A1U8FHC9; A0A0K9NYL5; A0A0D2S1Z3; A0A1U8EIM6; A0A0D2V4L6; A0A0D3EGT2; A0A0D3AH59; A0A0D3B0C3; A0A1S3CT27; A0A1U7Z806; C6GFP3; M4CP75; R0H666; Q8H135; F6HFL0; M4EIN3; G1JSJ8; A0A2P5S6E2; A0A087G5U2; A0A0D2TNE4; S8DTS7; A0A2R6QQP9; A0A2H5PRB4; M4EIN4; P29685; A0A0D3AI87; B9HWA2; F6GTT2; A0A078HSM2; A0A078GA38; S8C857; A0A0D3EGT1; A0A067LEH6; A0A067FNL4; A0A0B0MTN9;…	731341013 [431-446]; A0A175YRR8 [297-312]	0	1867.91	16
FALSE	High	Unambiguous	ILMKPGDLIVLPAGIYHR	[R].ILMKPGDLIVLPAGIYHR.[F]					0.0565034	0.00054243	0.266	1	3	2	A0A078FPR7	A0A078FPR7; M4F4J4; A0A0D3ATU8	A0A078FPR7 [190-207]	0	2006.16	18
FALSE	High	Unambiguous	VDFAPYGLNPPHIHPR	[R].VDFAPYGLNPPHIHPR.[AGV]					0.00522895	0	0.653	1	4	3	731322509	A0A0K9RTR7; M0TVU0; 731322509; A0A199VVC4	731322509 [99-114]	0	1829.94	16
FALSE	High	Unambiguous	VVTTQAPVQLGSLR	[K].VVTTQAPVQLGSLR.[A]					0.00222409	0	0.792	1	1	2	A0A0K9QGV0	A0A0K9QGV0	A0A0K9QGV0 [358-371]	0	1468.85	14
FALSE	High	Unambiguous	IDFAPYGLNPPHVHPR	[R].IDFAPYGLNPPHVHPR.[A]					0.0101596	0	0.545	1	2	5	731368278	S8CMI3; 731368278	731368278 [98-113]	0	1829.94	16
FALSE	High	Unambiguous	WGTHVMGPPSNPTAHPDNQQAALWR	[K].WGTHVMGPPSNPTAHPDNQQAALWR.[A]					0.000618861	0	1	1	1	1	731342992	731342992	731342992 [35-59]	0	2768.31	25
FALSE	High	Unambiguous	LDFAPYGLNPPHIHPR	[R].LDFAPYGLNPPHIHPR.[GAQ]					0.00728864	0	0.599	2	18	8	A0A2N9GJ55; A0A068V823	A0A2N9GJ55; A0A2P4MTD2; A0A059BDB8; A0A068VNQ5; A0A2P4H837; A0A068V823; A0A059B614; A0A2N9H3H0; A0A2N9H7M5; A0A2H3X690; A0A2P4HC27; A0A058ZR22; A0A1Q3BPW4; A0A068VAU4; A0A059CR47; A0A059B5S1; A0A059BEW6; A0A059B5H7	A0A2N9GJ55 [101-116]; A0A068V823 [330-345]; [560-575]	0	1843.96	16
FALSE	High	Unambiguous	RVNQAIYLLTTGAR	[R].RVNQAIYLLTTGAR.[E]					0.106459	0.00224036	0.163	1	244	16	I0YZL1	A0A1S2Z921; A0A166AA18; A0A200PTV5; I0YZL1; V4SR92; A0A2G2Y0X0; A0A1U8HTP1; A0A251VIX3; A0A2H5MXV6; A0A2P2LDL4; A0A2N9ER63; B9T7U3; D8QTD1; A0A0U1VMQ5; C1E560; K3XM55; A0A1Q3D1E8; C1N2W4; V4UUB6; V7BV97; A0A1S3BGS8; W1NVE5; B4FB66; A0A2H3X4I4; A0A2J6MIQ5; A0A0K9RM59; A0A1J7G599; F2CT61; M0T1K9; A0A1J3JQ78; M8BL41; I3SKT5; M0TNT8; H2KWI0; A0A1D5WTY5; A0A0E0F5Q9; A0A0K9P735; A0A0L9ULY6; A0A1Q3D0W5;…	I0YZL1 [138-151]	1	1575.9	14
FALSE	High	Unambiguous	SHPGGPPASEFDWGTGETPRR	[K].SHPGGPPASEFDWGTGETPRR.[S]					0.0020033	0	0.809	1	2	2	731353239	731353239; A0A0K9R0V4	731353239 [64-84]	1	2238.03	21
FALSE	High	Unambiguous	VHDRVIAEDAGADDEPDGNQHVTAR	[R].VHDRVIAEDAGADDEPDGNQHVTAR.[L]					0.000276502	0	1.131	1	1	1	731363127	731363127	731363127 [116-140]	1	2687.24	25
FALSE	High	Unambiguous	FVENLDEEDEDDELRR	[R].FVENLDEEDEDDELRR.[V]					0.00161533	0	0.844	1	1	2	731338371	731338371	731338371 [111-126]	1	2022.89	16
FALSE	High	Unambiguous	RQFSTPEDMLTGSSRPR	[R].RQFSTPEDMLTGSSRPR.[T]					0.0117755	0	0.521	1	1	5	731350182	731350182	731350182 [14-30]	1	1964.96	17
FALSE	High	Unambiguous	SIGSGGGLSVPGLASR	[R].SIGSGGGLSVPGLASR.[L]					0.0890687	0.000962316	0.192	1	5	1	731321726	A0A2I4DDR0; A0A2I4DDQ4; A0A2I4DDP4; 731321726; A0A0K9QJ11	731321726 [138-153]	0	1414.76	16
FALSE	High	Unambiguous	TEMIQAINETTSGER	[K].TEMIQAINETTSGER.[S]					0.00386846	0	0.702	1	1	3	731330442	731330442	731330442 [169-183]	0	1679.79	15
FALSE	High	Unambiguous	LDFGIGGVIPLHSHR	[R].LDFGIGGVIPLHSHR.[T]					0.0235939	0	0.408	1	4	2	731372227	731372231; 731372227; A0A0J8B5D5; A0A0J8B8Q9	731372227 [101-115]	0	1617.89	15
FALSE	High	Unambiguous	MEGVLSQIGHQSSPSPSGTTDQSATELPSTSR	[R].MEGVLSQIGHQSSPSPSGTTDQSATELPSTSR.[G]					5.83374e-05	0	1.384	1	3	1	1108865121	1108865121; A0A0J8B373; A0A0J8DX51	1108865121 [254-285]	0	3272.53	32
FALSE	High	Selected	TTPSYVAFTDTDR	[R].TTPSYVAFTDTDR.[L]					0.049353	0	0.288	1	1	11	A0A2P5C6D9	A0A2P5C6D9	A0A2P5C6D9 [40-52]	0	1473.69	13
FALSE	High	Rejected	LEFGVGGVIPLHSHR	[R].LEFGVGGVIPLHSHR.[T]					0.041291	0	0.317	0	5	1		731372277; A0A0J8B4S2; A0A0J8B8C5; A0A0J8B8B4; 731372338		0	1617.89	15
FALSE	High	Unambiguous	VVNTGTVLQVGDGIAR	[KR].VVNTGTVLQVGDGIAR.[IVA]					0.0117755	0	0.521	1	193	1	A0A0A0QDB2	A0A067YQB8; X2G7S6; H2F4D7; U6A4Y1; A0A1L6BVV4; A0A0K1ZYZ0; A0A0K1ZV99; A0A1Z1BIS9; A0A0K1ZYA4; A0A1Y0EZ09; A0A0E3JWA7; Q09G61; Q589B3; A0A0N9HGP8; A0A289E1K2; V9PEW9; A0A0K1ZUV9; A0A219T3E8; A0A288XPQ1; A0A0K1ZVY0; A0A172QGT6; A0A2P1ALG1; A0A1L5JBI7; A0A2I7YXK9; A0A0K0K8D9; A0A222AGE4; F8RS84; A0A0K0M2C1; H2F4E0; A0A1I9VY36; A0A1C7ACW5; A0A125R2V5; A0A290D4Q9; H2F4F8; A0A161ASJ9; A0A191TFB2; L7T…	A0A0A0QDB2 [26-41]	0	1598.89	16
FALSE	High	Unambiguous	IAPDGGAQLIIPR	[K].IAPDGGAQLIIPR.[G]					0.0129135	0	0.506	1	1	2	731321957	731321957	731321957 [93-105]	0	1320.76	13
FALSE	High	Unambiguous	ILSNIPISR	[R].ILSNIPISR.[GE]					0.0869043	0.000962316	0.196	1	118	15	731342502	A0A0D9V552; D8SCN8; A0A0S3T320; F6HNY8; A0A2K2AJH3; A0A1S3Z494; V7CJP8; D7SYR8; 731342502; A0A200RDI8; A0A0E0N1W2; A0A2G9FYK6; A9TG98; I0YJN1; A0A0D3ETI1; A9SHR7; A0A0E0FSH7; A0A061DLQ7; A0A2G3BCM4; A0A2I0AMA2; A0A1S3VLN4; A0A2J6K8N4; A0A251SSP9; A0A1U8HC78; A0A067LEQ1; A0A0D2VV73; I1JC62; A0A164W5S5; A0A2G9G3Y5; A0A1J6IV39; A0A059DH29; A0A0U9HK63; A0A1U7W340; A0A2P5XQU1; A0A2K2AJH6; A0A0K9QXL6; …	731342502 [212-220]	0	1012.61	9
FALSE	High	Unambiguous	ADRDESSPYAAMLAAQDVSQR	[K].ADRDESSPYAAMLAAQDVSQR.[C]					0.000560865	0	1.016	2	109	4	A0A162ADI1; A0A2K1YH76	A0A1S3X3E1; A0A251N9N1; A0A162ADI1; A0A1U8EGK0; A0A2P5WEL8; A0A061GKY0; A0A061GW32; A0A2P5XLR8; A0A0D2SYF1; A0A2G9GC36; A0A2P5RQ37; M0TWT0; A0A218XCW4; A0A118K3B3; A9PIB5; A0A199VAK1; A0A2K2C1M8; A0A2P4LU54; A0A2I0HUF8; A0A218WUT2; A0A2G9HHT2; A0A2R6PY85; A0A251NPU5; A0A2P5SBA1; A0A2N9J0U8; A0A2P5QMV9; A0A2C9UF24; A0A1D1Z3U1; M5W2M2; A0A2N9EFI6; A0A2K1YH55; A0A2K2C1Q0; A0A218XC98; 731344994; A9PD…	A0A162ADI1 [1149-1169]; A0A2K1YH76 [63-83]	1	2281.05	21
FALSE	High	Rejected	LIGATNPLESAPGTIR	[K].LIGATNPLESAPGTIR.[G]					0.214621	0.00825917	0.049	0	8	2		A0A1S3X9H4; A0A1J6JLM3; Q9M7P6; A0A1U7UVS7; A0A1U7XPA8; A0A2G3AM91; A0A1S3ZUE6; A0A1S3X9D6		0	1609.89	16
FALSE	High	Unambiguous	LQHLAGEHSDILESLTPNVR	[K].LQHLAGEHSDILESLTPNVR.[K]					0.00073065	0	0.973	1	1	4	731348203	731348203	731348203 [48-67]	0	2229.16	20
FALSE	High	Unambiguous	LDFGVGGIIPVHSHR	[R].LDFGVGGIIPVHSHR.[T]					0.161736	0.00409645	0.095	1	1	3	731356301	731356301	731356301 [91-105]	0	1603.87	15
FALSE	High	Unambiguous	HVPNFAAGLLR	[K].HVPNFAAGLLR.[M]					0.153027	0.00373344	0.104	1	1	2	731356248	731356248	731356248 [57-67]	0	1194.67	11
FALSE	High	Unambiguous	LREGLPLMEDDFR	[K].LREGLPLMEDDFR.[L]					0.00372831	0	0.708	1	1	6	731349068	731349068	731349068 [322-334]	1	1590.79	13
FALSE	High	Unambiguous	MHAAIANAVGSLGDPERR	[R].MHAAIANAVGSLGDPERR.[Q]					0.037192	0	0.334	1	1	1	731336741	731336741	731336741 [118-135]	1	1864.94	18
FALSE	High	Unambiguous	RFASINVENVEDNRR	[K].RFASINVENVEDNRR.[A]					0.0759067	0.000962316	0.218	1	32	2	731345323	M8AMF3; C1J960; A0A0E0QWN8; 731345323; W5D0E3; A0A1D5WMF1; M0UTD1; A0A1D5VE13; A0A1D5VD12; F2CXT7; A0A287M5E0; W5D5L4; A0A287M5E2; A0A1D5VD11; M7ZGS6; A0A287M5C8; Q10A30; K6ZXS1; M7ZYB3; C1J959; A0A1D5WIS5; A0A2P1E8S5; A0A1D5VV61; A0A1D5WIS4; A0A0D9ZAS7; C1J958; M7ZAX1; J3N162; A2XUB6; A0A1D5ZGE0; I1HUD0; A0A1D5WMF2	731345323 [39-53]	2	1818.92	15
FALSE	High	Unambiguous	VFLENVIR	[K].VFLENVIR.[D]					0.186312	0.00627731	0.072	1	17	2	A0A250X637	A0A1U7Y5U1; A0A250X637; A0A1Y5I0Z4; A0A2H3XD22; A0A1D1YII8; A0A250X5X8; A0A2H3Z4J4; A0A2H3ZBL0; I0YU00; A0A1D1YMV2; A7Y228; M7ZMQ6; K8F334; A0A250XFD0; A0A090M310; A0A250X930; A0A1U7XUJ4	A0A250X637 [61-68]	0	989.578	8
FALSE	High	Unambiguous	VDGGYGRPSYPIGHR	[R].VDGGYGRPSYPIGHR.[H]					0.0792459	0.000962316	0.211	1	1	1	731330784	731330784	731330784 [28-42]	0	1630.81	15
FALSE	High	Unambiguous	MTVTHLASAGRGPNSEDQATR	[R].MTVTHLASAGRGPNSEDQATR.[K]					0.00652483	0	0.617	1	3	3	731333018	731333018; 731333021; A0A0K9R7Q5	731333018 [139-159]	1	2199.06	21
FALSE	High	Unambiguous	SQQQQQQQQQQQQQQQQQQQQQQQQR	[R].SQQQQQQQQQQQQQQQQQQQQQQQQR.[W]					0.112518	0.00257247	0.154	1	1	2	A0A0D2LHU2	A0A0D2LHU2	A0A0D2LHU2 [3-28]	0	3335.56	26
FALSE	High	Rejected	TTGIVLDSGDGVSHTVPIYEGFSLPHAILR	[R].TTGIVLDSGDGVSHTVPIYEGFSLPHAILR.[L]					0.0249366	0	0.399	0	29	1		W0FUI3; B9DHA3; A0A1S3C0M1; D8L1W0; M4F8Z7; H9ZNK4; C7DRT1; Q9ZTP9; R0ILT2; A0A078J693; A0A1J3DH67; I1WWX9; H9ZNK3; V4M6T1; G0Z3H2; A0A0D3BC17; H9ZNK6; Q93ZL9; C0LSP3; A0A0A0K2G0; Q8LB94; M9NNX1; A0A087G2Y2; F4J8V9; A0A087G3V9; W0FQW6; Q3ZDM5; H9ZNK2; H9ZNK5		0	3151.64	30
FALSE	High	Unambiguous	HFTDAITLSPTNHVLYSNR	[K].HFTDAITLSPTNHVLYSNR.[S]					0.00164541	0	0.841	1	1	1	731330539	731330539	731330539 [24-42]	0	2186.1	19
FALSE	High	Unambiguous	GLNPPHIHPR	[RK].GLNPPHIHPR.[GA]					0.102602	0.00224036	0.169	1	12	3	A0A1S2Z1Y2	I3SGJ5; G7IP76; S8D0K4; A0A2K3LBY0; G7JQ52; Q9SC38; A0A2R6QTH3; A0A0D3AFE2; Q9SC39; G7JQ51; A0A1S2Z1Y2; G7JQ50	A0A1S2Z1Y2 [102-111]	0	1137.63	10
FALSE	High	Unambiguous	DLYANTVLSGGTTMYPGIADR	[K].DLYANTVLSGGTTMYPGIADR.[M]					6.67894e-05	0	1.362	1	3	1	F2D4P0	S8DD77; F2D4P0; A0A2H3X9F7	F2D4P0 [293-313]	0	2215.07	21
FALSE	High	Unambiguous	HYTDINQLPPHR	[R].HYTDINQLPPHR.[L]					0.153027	0.00373344	0.104	1	7	1	1108920788	A0A1S4CCP8; Q711H9; 731331965; A0A0K9RMT2; A0A162ATN3; 1108920788; A0A068UVD6	1108920788 [171-182]	0	1490.75	12
FALSE	High	Unambiguous	VRRPSDYNPSLAAALGPSQPNPNLNLGAVGLTPGSAGGLEGPDR	[K].VRRPSDYNPSLAAALGPSQPNPNLNLGAVGLTPGSAGGLEGPDR.[I]					8.38558e-05	0	1.325	1	4	1	731339391	731339391; 731339393; 731339399; 731339395	731339391 [326-369]	1	4353.23	44
FALSE	High	Unambiguous	SFSTNPSVTANTQTPVDVDSGHDAFR	[R].SFSTNPSVTANTQTPVDVDSGHDAFR.[A]					0.000200821	0	1.183	1	1	1	731339990	731339990	731339990 [150-175]	0	2750.27	26
FALSE	High	Unambiguous	ALMLQGVDILADAVAVTMGPK	[R].ALMLQGVDILADAVAVTMGPK.[G]					0.0853156	0.000962316	0.199	1	1	1	A0A1D1YFX2	A0A1D1YFX2	A0A1D1YFX2 [34-54]	0	2113.14	21
FALSE	High	Unambiguous	IQAVDIATVGAR	[R].IQAVDIATVGAR.[V]					0.0551303	0.00054243	0.27	1	1	2	731358315	731358315	731358315 [170-181]	0	1213.69	12
FALSE	High	Unambiguous	SSSIGNGVQFLNR	[R].SSSIGNGVQFLNR.[H]					0.0211213	0	0.426	1	221	2	731346220	A0A1D6K2E8; Q93WS3; A0A2G3CTI1; A0A0U2XX47; A0A1E5VTT9; A0A0D2QXH5; I1T4U4; A0A2P6PWV7; A0A1D6K2E0; A0A1D6K2H5; A0A1D5Y494; A0A2H5NLD6; A0A0D3E006; A0A0L9UAA1; A0A1S3ZGC4; A0A078GAK2; M1A8J5; A0A2P6QYK3; A0A1S4DHW4; A0A287NZT5; A0A1D6K2F6; A0A067H5L6; I1T4U1; I1T4T8; J3LNM1; A0A251VL45; A0A2K3PQ77; O24301; Q42652; A0A2P5CLM3; I1T4U2; Q9SLY2; A0A2I4EZE2; K4HUT4; I1T4S6; A0A1D6K2G4; A0A1R3IHE8; G9B…	731346220 [151-163]	0	1378.71	13
FALSE	High	Unambiguous	MDEIAEDATAFPHR	[R].MDEIAEDATAFPHR.[A]					0.0129932	0	0.505	1	1	2	731347943	731347943	731347943 [418-431]	0	1602.72	14
FALSE	High	Unambiguous	TEHTIKQQQQQQQR	[K].TEHTIKQQQQQQQR.[K]					0.213305	0.00825917	0.05	1	1	1	A0A2R6R8Q1	A0A2R6R8Q1	A0A2R6R8Q1 [222-235]	1	1780.9	14
FALSE	High	Unambiguous	LPNHYLVSPPEIER	[K].LPNHYLVSPPEIER.[T]					0.0228794	0	0.413	2	8	1	731310533; 731344436	C5DB50; 731310533; A0A0K9QXB6; C5DB67; A0A0K9RD63; 731344436; E6Y5B3; A0A1J7H4F6	731310533 [327-340]; 731344436 [327-340]	0	1663.88	14
FALSE	High	Unambiguous	LLTGDTNYYDIR	[K].LLTGDTNYYDIR.[K]					0.0207352	0	0.429	1	1	2	731341633	731341633	731341633 [316-327]	0	1443.71	12
FALSE	High	Unambiguous	NTLLSVHIVLSQVLINIANR	[R].NTLLSVHIVLSQVLINIANR.[S]					0.218617	0.00825917	0.046	1	1	1	A0A0D3D7R7	A0A0D3D7R7	A0A0D3D7R7 [60-79]	0	2217.31	20
FALSE	High	Unambiguous	SHSGSIGPVIIIR	[R].SHSGSIGPVIIIR.[G]					0.143017	0.00292848	0.115	1	2	2	731348501	A0A0K9QPM9; 731348501	731348501 [395-407]	0	1335.77	13
FALSE	High	Unambiguous	GIRFPGRDDESLAPVFTPAR	[R].GIRFPGRDDESLAPVFTPAR.[S]					0.103235	0.00224036	0.168	1	1	1	731320998	731320998	731320998 [179-198]	2	2201.15	20
FALSE	High	Unambiguous	SVGVGMNAMDLRR	[R].SVGVGMNAMDLRR.[G]					0.0271788	0	0.385	1	2	5	A0A0K9RZF6	A0A0K9RZF6; 731372887	A0A0K9RZF6 [137-149]	1	1405.7	13
FALSE	High	Unambiguous	IGGNLPGVHYIR	[K].IGGNLPGVHYIR.[DENH]					0.0265184	0	0.389	1	115	2	731330979	A0A0D2Q1F2; F2DF21; M5WCZ6; A0A0Q3F6S4; B3EYD3; C3VPH7; A0A2R6QJ05; A0A0V0IID6; A0A1U8A8A8; A0A0E0EHX0; V4KNT4; A0A067JN22; A0A287WUK9; A0A1D8RJ33; A0A2P5QUC4; R0IAD7; V4SXU4; A0A251P6K8; V4KGP3; C6T8Y2; A0A200QRY1; A0A2C9WI18; A0A287WUL4; C3SAE1; A0A2P2L8A5; D8RSN7; M4EFV7; Q75UU7; A0A0E0EHW9; A0A2I0J3X6; A0A251P6J9; A0A1U8GEC0; A0A0D3GWE2; A0A199VP65; J3MQD5; A0A061G5J3; C3W334; A0A087HEC9; A0A…	731330979 [195-206]	0	1295.72	12
FALSE	High	Rejected	YSSSNIEIHTFNQSQYPR	[K].YSSSNIEIHTFNQSQYPR.[LI]					0.018908	0	0.444	1	2	2	A0A2I4DWC6	A0A2I4DWC6; A8W7I0	A0A2I4DWC6 [156-173]	0	2171.02	18
FALSE	High	Unambiguous	YTNSSVEIHTFNQSQYPR	[K].YTNSSVEIHTFNQSQYPR.[L]					0.00372831	0	0.708	1	1	6	731366257	731366257	731366257 [157-174]	0	2171.02	18
FALSE	High	Unambiguous	LIQDHQADFLR	[R].LIQDHQADFLR.[L]					0.0099739	0	0.548	1	24	7	A0A087H6G2	V4M4H8; A0A022RY45; A0A0C9S5X7; D7KZI5; A0A1Q3C6B9; A0A1J3H254; 731315784; S8CV88; Q84L31; F4JD57; C0PQD9; A0A087H6G2; A0A087H6G1; A0A1J3EUV6; A0A0D6QYF8; A0A022R109; A0A1J3E1D9; A0A118K1J6; A0A0D6QZZ3; V4NT19; A0A1J3JSP4; R0HSV0; A0A0C9RLH4; A0A178V8E8	A0A087H6G2 [346-356]	0	1355.71	11
FALSE	High	Unambiguous	IQNLASQGSAADRELVAPR	[R].IQNLASQGSAADRELVAPR.[L]					0.00101221	0	0.92	1	1	6	731360998	731360998	731360998 [617-635]	1	1996.06	19
FALSE	High	Unambiguous	LYTGNHGIISLR	[K].LYTGNHGIISLR.[N]					0.00839612	0	0.576	1	1	1	731326779	731326779	731326779 [177-188]	0	1343.74	12
FALSE	High	Unambiguous	QLGGAHVEFLR	[R].QLGGAHVEFLR.[G]					0.0464092	0	0.298	1	1	1	A0A067KUZ2	A0A067KUZ2	A0A067KUZ2 [327-337]	0	1226.66	11
FALSE	High	Unambiguous	IHTNLNPAGYGPYGQGR	[K].IHTNLNPAGYGPYGQGR.[D]					0.00152835	0	0.853	1	1	10	731357332	731357332	731357332 [106-122]	0	1814.89	17
FALSE	High	Unambiguous	IEKSSVAEIVLVGGSTR	[K].IEKSSVAEIVLVGGSTR.[I]					0.118921	0.00257247	0.145	1	1	3	A0A251TI78	A0A251TI78	A0A251TI78 [334-350]	1	1744.98	17
FALSE	High	Unambiguous	LYQPVHLIVGTPGR	[R].LYQPVHLIVGTPGR.[IV]					0.0924168	0.00187066	0.186	1	263	2	A0A218XVB7	B8AFZ8; A0A0D9YVK4; A0A1U8NXL6; A0A2N9GQQ9; B9RDP2; A0A2G2YJV9; A0A0E0H3I7; A0A0E0R130; A0A059CIQ4; A9SHW4; A0A2R6R9Z5; 731331115; A0A0Q3UV17; A0A0D2QRL2; A0A1D1Z1B7; A0A0D3F843; A0A061DTF1; A0A0D3HFD7; A0A2K1I9Y6; W5GAA5; A0A0D3C6H0; A0A067HDU9; A0A2P5B2Q4; A0A0E0DGK9; A0A067HE27; G7L3K0; A0A1S2YW03; A0A200QUE6; G7L3J8; A0A0D3B952; A0A2K1XS92; I1JKB0; A0A161XGI3; A0A0D9VIT6; A0A2H3X5L8; F2D1S2; …	A0A218XVB7 [441-454]	0	1549.88	14
FALSE	High	Unambiguous	IVYENEYDPYRR	[R].IVYENEYDPYRR.[M]					0.03859	0	0.328	1	1	1	731330784	731330784	731330784 [107-118]	1	1616.77	12
FALSE	High	Unambiguous	VRELLAQGFSQSR	[R].VRELLAQGFSQSR.[Y]					0.0964823	0.00187066	0.179	1	2	1	A0A0K9S0T3	731330813; A0A0K9S0T3	A0A0K9S0T3 [586-598]	1	1490.81	13
FALSE	High	Unambiguous	LQTQHILGSAVPR	[R].LQTQHILGSAVPR.[K]					0.108442	0.00224036	0.16	1	1	1	731350496	731350496	731350496 [320-332]	0	1419.81	13
FALSE	High	Unambiguous	LISTHNPYGSLPR	[R].LISTHNPYGSLPR.[S]					0.0164139	0	0.467	1	1	2	731323024	731323024	731323024 [147-159]	0	1454.78	13
FALSE	High	Unambiguous	ALEHEMILR	[R].ALEHEMILR.[IL]					0.15878	0.00409645	0.098	1	5	4	1108966238	Q6SJP5; A0A199VHQ6; A0A2H3XJL7; 1108966230; 1108966238	1108966238 [309-317]	0	1111.59	9
FALSE	High	Unambiguous	TVNRPYGGVLSGSAVR	[R].TVNRPYGGVLSGSAVR.[E]					0.167816	0.00563879	0.089	1	8	1	731335043	731363081; A0A1R3GGL1; A0A0K9RAX1; 731344027; A0A0K9RVD6; 731335043; A0A022R1E5; A0A1S3X839	731335043 [73-88]	0	1632.88	16
FALSE	High	Unambiguous	ERLPANLVQAQR	[R].ERLPANLVQAQR.[D-]					0.0124457	0	0.512	1	133	2	A0A2H5P1K5	A0A2I0ATH4; A0A2N9H1M7; A0A2G2VKI7; A0A1S3CBC8; A0A251LQ27; F8T8Z6; A0A1J3GKN0; A0A1J3CTD8; F8T8Z8; A0A078HB53; A0A0D3CN92; A0A2I4EBN6; A0A1R3HPG3; B9N1W3; A0A103YH33; V4TMI0; Q40311; A0A0A0KXM8; A0A199UUQ9; A0A2G9H5I9; A9P8N7; A0A067JNE2; F8T8Z0; F8T8Y8; F8T8Z3; Q8SAQ6; D7KZG2; B6RPT4; B6RPT2; A6XGT1; A0A0B2PZB0; F8T900; G3LMD7; B9SXT4; A0A067G3F9; W5CQC7; A0A1D1YEA4; B6RPT7; B6RPU0; F8T8Y9; D6P…	A0A2H5P1K5 [487-498]	1	1394.79	12
FALSE	High	Unambiguous	VVNYNHIMPTR	[K].VVNYNHIMPTR.[Y]					0.190952	0.00652397	0.068	1	17	2	S8CYZ4	D5ABK8; A0A0K9PRG6; A0A1Y1HTF4; A9NQ84; A0A0K9QFA8; A0A0K9PX03; A9SIT7; A9TFR5; A9TVF9; 731377251; S8CYZ4; H9WG89; A9SPG7; A0A0C9RV85; A0A1D1ZGX3; A0A0K9RER7; A0A0D6R5W5	S8CYZ4 [119-129]	0	1343.69	11
FALSE	High	Unambiguous	HSLPDGLMR	[R].HSLPDGLMR.[AS]					0.0638989	0.000962316	0.246	1	279	10	A0A0J8CM32	A0A1S2YCQ2; D8TV30; A0A251U8U5; A0A075C9J8; R0GZH8; A0A1D5U4G9; A0A075TMU8; A0A0D2PM16; A0A250WUN3; A0A2H5PF44; Q2XTD0; A0A2R6QGH1; Q4LB20; A0A2P5WML2; A0A075TR86; A0A1D2ADD2; A0A151SQA1; A8IXE0; A0A0D2RN09; Q9SWF5; A0A176W2L4; A0A1U8G475; A0A2P5YRK1; A0A078ID72; A0A0D2UUJ6; W8NQ01; A0A0N7KSW1; A0A075TR90; A0A0K9S094; A0A0D9XRV3; A0A059LP45; A0A075TY20; A0A2G2ZTN5; A0A2G9HN05; A0A075CC67; A0A075C…	A0A0J8CM32 [248-256]	0	1025.52	9
FALSE	High	Unambiguous	HEQGGVFAAEGYAR	[R].HEQGGVFAAEGYAR.[AST]					0.000806203	0	0.957	2	220	1	731366983; A0A2G9HC54	E5DG51; A0A1S3VKK8; A0A0D2USX1; U3TK24; I1MEG7; A0A0E3N6A3; A1Z0Y9; Q9FEB8; A0A022RVT2; G0Z3H1; P09114; A0A221C9A6; A0A1J3K918; U3TKA2; D7LRY3; A0A2P5YI88; Q8RVQ0; A0A2R6PE79; A0A2P5DVG8; Q5VB46; A0A118K3M9; Q5VB49; G0ZS27; P27818; Q93XN5; E5DG16; A0A2P4HPZ9; A0A191KVR8; J7H732; Q8L6E3; S8C5M7; A0A0B5GGJ4; B5A9S5; Q84PP1; D7QYK8; G9F9N0; A0A1U7W601; E5DG33; V7BT19; A0A140F9X8; Q4J6B0; A0A191KVQ8;…	731366983 [134-147]; A0A2G9HC54 [93-106]	0	1491.7	14
FALSE	High	Unambiguous	TPWNTNEDEHEIR	[R].TPWNTNEDEHEIR.[M]					0.00698152	0	0.606	1	2	10	731327227	731327227; A0A0K9QY42	731327227 [86-98]	0	1640.73	13
FALSE	High	Unambiguous	QHTTGPSVTPPLQQGR	[K].QHTTGPSVTPPLQQGR.[N]					0.123392	0.00257247	0.139	1	2	1	731326955	731326955; J3SHR8	731326955 [97-112]	0	1703.88	16
FALSE	High	Unambiguous	NTALHYAAGYGR	[K].NTALHYAAGYGR.[KRQEA]					0.0143368	0	0.489	1	182	2	731350661	A0A103XMY2; A0A2I0LEX7; A0A0D2TV08; A0A068TMH4; A0A1D5X760; A0A2P6PTL5; A0A124SHY4; A0A1D5X759; A0A2G3AUL2; A0A0D2W3G0; A0A2I0J8G7; A0A2P5SNM1; A0A0B0PLL7; A0A199VNJ2; A0A218W522; B9RKV9; D7U4N2; A0A067E567; A0A0D2PM03; A0A059ANZ9; A0A1E5W0U8; A0A1U8NKC4; A0A1J6IKG4; A0A0E0P3Z9; A0A2G5DEC6; V7BRV0; A0A1J7HVM9; A0A2G5DEA9; A0A1R3FX86; I3S7Z6; A0A0A0K6C7; A0A2R6QB24; W5DNR0; Q84P56; A0A1U8KSG1; A0A…	731350661 [287-298]	0	1293.63	12
FALSE	High	Unambiguous	NQGREDDNLETIR	[R].NQGREDDNLETIR.[KR]					0.0176711	0	0.455	1	98	24	731315844	W9RT42; V4KQB2; B7FMF1; A0A1U8ELF0; A0A2G3AM12; A0A251QED8; A0A2K2BIB5; A0A2I4EHS1; A0A2I4GHZ0; A0A2G2XT48; A0A1U8N791; M4D0A0; A0A1R3GVI3; A0A0B0NC40; A0A061FQ73; A0A2P5XC50; A0A218X052; A0A1U8M2D7; A0A1R3J5X8; A0A1Q3D594; A9PHR2; V4ML70; A0A0D3AXI4; A0A2N9HSQ3; A0A2I0IET5; A0A1U8KRL4; A0A078J8E8; A0A2G9G4U3; A0A218WQF8; A0A2K3P2S0; A0A1U8M2E8; A0A2P5XXZ7; A0A2P4N6D4; A0A1U8KWC8; C6T042; A0A251Q…	731315844 [142-154]	1	1559.74	13
FALSE	High	Unambiguous	TRPSVSFTNEEIEQLTVR	[K].TRPSVSFTNEEIEQLTVR.[I]					0.107777	0.00224036	0.161	1	2	1	1108808470	A0A0J8B8V5; 1108808470	1108808470 [284-301]	0	2106.08	18
FALSE	High	Unambiguous	AVFIDLEPTVIDEVR	[R].AVFIDLEPTVIDEVR.[T]					0.0058771	0	0.634	1	53	34	A0A0D5MER0	V4SZ59; A0A2G5ENT8; A0A0D5MER0; A0A2N9I9Q6; A0A061R7V3; M1SWD3; R0GEE0; A0A2P5D222; A0A061EGA7; A9U6C9; A0A200QS99; A0A2R6WA48; A0A1U8PIA3; A0A176W312; A0A2I4E334; A0A2K1K4E0; A0A2K1KLU8; A0A1U7Z4W7; A0A2K1X4Y3; A0A0D6R4M6; A0A0K9Q5H4; C0PQU1; A0A2H3YVZ5; A0A218WD47; A0A176VU08; C1EGH4; A9SEI4; Q8H932; P11139; A0A0B0NAM9; A0A2G5C9C9; A0A061S5T8; D8QZI9; A0A2P4IPB7; A9SWZ8; F6H5R4; A0A2P5B1P4; A0A…	A0A0D5MER0 [66-80]	0	1715.92	15
FALSE	High	Unambiguous	LQATLDTIQSTEQAREETRAEER	[R].LQATLDTIQSTEQAREETRAEER.[K]					0.0108041	0	0.535	1	1	1	731370585	731370585	731370585 [818-840]	2	2675.32	23
FALSE	High	Rejected	LNLPILPTTTIGSFPQTIDLRR	[K].LNLPILPTTTIGSFPQTIDLRR.[V]					0.000301364	0	1.117	0	4	6		A0A2P5FUF9; A0A067LFN5; B9RQ33; A0A2P5CDT6		1	2466.41	22
FALSE	High	Unambiguous	IAREIEGEETQDLHLAEER	[RK].IAREIEGEETQDLHLAEER.[G]					0.00218343	0	0.795	1	44	1	A0A1D1YZB5	A0A0R0IZ15; A0A1D1YZB5; A0A059BUL7; 1108984626; A0A061GDJ6; A0A0R0FTB8; A0A0L9T5H2; A0A2I4FTX0; A0A1S2YV56; K7MEF3; A0A072TY37; A0A1S3EFE4; K7MEF1; A0A0R0FSW5; A0A0B0P2V4; A0A061GCB6; A0A061GBI0; V7APG6; A0A1S3U4N7; A0A2P5WYN7; A0A0R0IZ11; A0A151SUH6; I1MD35; A0A0S3SZQ0; I1M589; K7MEE8; A0A059BUY7; A0A059BU65; I1MD33; K7MEE9; V7BZE8; A0A2I4FTW8; K7KZH8; A0A072TM23; 731359254; A0A1Q3CY12; A0A2P4H1…	A0A1D1YZB5 [340-358]	1	2238.1	19
FALSE	High	Unambiguous	RGGYMEVTGFSPEIR	[K].RGGYMEVTGFSPEIR.[ED]					0.041291	0	0.317	1	18	2	K4BN60	A0A2R6QF70; A0A2R6R0I7; A0A2G3A3T6; A0A1S3CBU3; A0A1S4AAP9; A0A1S3CC99; A0A2G2WPD1; 731347888; A0A164X8N1; K4BN60; A0A2G3D1D6; A0A0A0LC12; A0A1J6L780; A0A1S3CDI5; A0A0V0IM68; A0A1S3ZP91; A0A142I5C3; A0A1U8FTE1	K4BN60 [401-415]	1	1698.83	15
FALSE	High	Unambiguous	KFSDVGLNTTDVVVLSGGHTIGR	[K].KFSDVGLNTTDVVVLSGGHTIGR.[A]					0.204317	0.00685958	0.057	1	1	1	B8A1T1	B8A1T1	B8A1T1 [180-202]	1	2372.26	23
FALSE	High	Unambiguous	LASLADVYVNDAFGTAHR	[K].LASLADVYVNDAFGTAHR.[A]					0.00118772	0	0.894	1	13	6	731318922	V7BTD0; A0A2P2K4N1; M5X0L9; A0A2P5CBA5; A0A067JM51; A0A251PJZ3; A0A2P6Q8D2; A0A2I4GVI3; A0A2P5APM8; A0A2N9H5Y5; 731318922; A0A2P2K4L8; M0TVU9	731318922 [138-155]	0	1919.96	18
FALSE	High	Rejected	LASLGDLYVNDAFGTAHR	[K].LASLGDLYVNDAFGTAHR.[A]					0.026682	0	0.388	0	1	3		A0A118K678		0	1919.96	18
FALSE	High	Rejected	LASVADLYVNDAFGTAHR	[K].LASVADLYVNDAFGTAHR.[A]					0.0201073	0	0.434	0	73	4		K3XXC5; A0A0D9YMV6; A0A0E0AD06; A0A0D6QZL8; K7B125; A0A0D3F185; A0A1D6AGT8; A0A0D9VCN8; K7AEV7; P12783; M7YG23; A0A287TTB0; A0A194YKQ5; A0A1D6AXV0; A0A0E0LEG8; W5H4V7; Q850M2; A0A0E0GWR2; A0A0A9TGE6; A0A287TT66; A0A1D6BEX1; K7AJG6; A0A194YMV2; A0A287TTT7; I1Q4G7; A0A287XR51; A0A1E5VE32; A0A287XR88; Q850M5; F2CQV1; B8LKQ1; A0A1D6CST5; A9NVA3; K6Z767; M8C564; K7AES9; A0A1D6AXU9; A0A287XR01; K7AFR4;…		0	1919.96	18
FALSE	High	Unambiguous	SIGSFRLDGIPPAPR	[K].SIGSFRLDGIPPAPR.[G]					0.019984	0	0.435	1	255	10	A0A2P6SDA5	A0A1D6A4M0; A0A1U8E6Q9; U5DCI6; A0A2N9HQ75; A0A2I0L2M9; A0A287F1Y2; A0A218XKN3; K7UCZ5; A0A0D9XY69; D2XNF3; A0A1D6L092; A0A151T835; W9QLM4; A0A067L5D7; Q9LTX9; A0A1D6IW15; A0A068V6R1; A0A1J3CRK4; Q0DJB9; A0A2I4DPC6; Q38IZ8; F6GTP0; A0A1D6S468; K3Z491; I1HKJ4; A0A1U8KEB7; A0A078F7A7; A0A0D2RDM8; V4T0G7; A0A161ZLU5; A0A2I4EEK7; A0A2G9IBF3; A2Y2Y4; A0A067DSB8; R0F380; A0A1J3JWI7; A0A287QTG0; M8BT11;…	A0A2P6SDA5 [574-588]	1	1582.87	15
FALSE	High	Unambiguous	QVFGAQMGLSDQDIVALSGGHTLGR	[R].QVFGAQMGLSDQDIVALSGGHTLGR.[C]					0.058989	0.00054243	0.259	1	4	1	A0A0E0NTJ3	A0A0E0NTJ3; A0A0D9Z5N3; A0A0E0GKX8; A2XFC7	A0A0E0NTJ3 [160-184]	0	2557.28	25
FALSE	High	Unambiguous	NIIHFYNLANQAVER	[R].NIIHFYNLANQAVER.[GA]					0.0244807	0	0.402	1	80	1	Q39442	A0A151SGF9; R0GDS5; A0A022PZI2; Q39291; M1CTC4; A0A0V0IQG7; A0A1J3JMQ2; A0A1J3DEQ8; A0A166EQ15; M4CHF0; A5BYV7; A0A251TNB0; A0A2G5DJZ9; A0A1U8FAN4; V4M7X4; A0A2K3NLX6; A0A2G3B3G6; A0A2P2MSU7; A0A059AJZ3; K4C764; D7EYG6; A0A0S3T1C2; P13548; A0A059BXG9; I3NVX2; A0A2P2MSS8; Q570K4; A0A072URM9; I1KG34; A0A1J3EQ73; V7AUF4; A0A2P2MSS6; F6H3B6; A0A1J7HTB3; K4DFR1; M1CII0; A0A1J3CJP2; A0A2G2Y948; A0A1S3V…	Q39442 [546-560]	0	1801.93	15
FALSE	High	Unambiguous	FTNVGLNLTDVVSLSGAHTIGR	[K].FTNVGLNLTDVVSLSGAHTIGR.[A]					0.0787601	0.000962316	0.212	1	2	1	A0A072URQ9	A0A072URQ9; A0A072V2Y0	A0A072URQ9 [176-197]	0	2271.21	22
FALSE	High	Rejected	VIMATNRPESLDPALLRPGR	[K].VIMATNRPESLDPALLRPGR.[L]					0.0727082	0.000962316	0.225	0	1	1		R0I8P0		0	2206.21	20
FALSE	High	Selected	VLMATNRPDTLDPALLRPGR	[KR].VLMATNRPDTLDPALLRPGR.[L]					0.0541225	0.00054243	0.273	1	239	2	A0A103XLE4	A0A1D6AAJ0; A0A287VYF0; I1JS66; A0A2J7ZQ42; A0A287UY80; A0A090M2R9; A0A1U8AME2; A0A2H3ZEQ4; A0A0D3BQH0; A0A103YB16; A0A1R3HJJ7; A0A061RLE3; A0A0D9VLW8; K4LJM0; A0A1U8AQV7; C1FE73; C6TEK4; U5FHC0; M1A1A0; A0A2R6PV42; A0A1D6HME5; V4SSD5; A0A1D6AAJ1; A0A2G9HUP9; W1NVS3; A0A2P5DYB7; A0A2H5PSX9; A0A0D2UHX3; A0A067KG48; A0A1R3H6K3; A0A1U8PHA3; V4NWE6; V4SHG7; A0A1U8FAJ3; A0A1J6J5T4; A0A287VYJ3; A0A218W…	A0A103XLE4 [530-549]	0	2206.21	20
FALSE	High	Unambiguous	SRGVYETPGGTILFSAAR	[K].SRGVYETPGGTILFSAAR.[E]					0.00073065	0	0.973	1	1	1	731317329	731317329	731317329 [356-373]	1	1881.98	18
FALSE	High	Unambiguous	TTGRVETPQQHQVMDNLPNESGETNTDVLLR	[R].TTGRVETPQQHQVMDNLPNESGETNTDVLLR.[H]					2.33332e-05	0	1.533	1	1	1	731342827	731342827	731342827 [230-260]	1	3479.68	31
FALSE	High	Unambiguous	IMRPQQVYTGEWLR	[K].IMRPQQVYTGEWLR.[H]					0.0126775	0	0.509	1	7	1	731356945	A0A2I4F961; B9IFM7; D7TMQ2; A0A1U8BAL0; B9T369; A0A2K1XVJ4; 731356945	731356945 [472-485]	0	1776.92	14
FALSE	High	Unambiguous	NPFAPTLHFNYR	[KR].NPFAPTLHFNYR.[Y]					0.200582	0.00652397	0.06	1	145	1	M0RVE0	A0A287J5E3; A0A0S3RIY3; A0A059A1C4; B9FCF5; G7KFC7; A0A061DLF1; A0A1S3BSI0; A0A0D3G071; A0A2G5D293; A0A2C9U752; A0A2C9U8B3; A0A2P5C5W1; F6HTQ1; A0A067E595; A0A0K9RC83; A0A1R3JQC1; A0A0D2QTU9; A0A1J3G8V6; A0A1S3UFW7; A0A0E0H5U1; A0A0P0WF16; A0A022RSW5; A0A151S007; J3M1A5; A0A0R0G797; A0A0A0KYN2; A0A1D6DZX6; A0A0B0NFK1; D7M2R3; A0A0D9X5G1; A0A067EH25; W9S1H4; A0A0K9NRD5; A0A0D2RUC0; A0A2H3YQI7; A0A…	M0RVE0 [357-368]	0	1476.74	12
FALSE	High	Unambiguous	HNSQLAWDAQITNVTGR	[R].HNSQLAWDAQITNVTGR.[R]					0.00584107	0	0.635	1	2	1	731319912	A0A0K9RQD5; 731319912	731319912 [59-75]	0	1910.95	17
FALSE	High	Unambiguous	REPGNEQAIANLYASMR	[R].REPGNEQAIANLYASMR.[T]					0.00494739	0	0.662	1	2	1	A0A0J8B4V4	731378234; A0A0J8B4V4	A0A0J8B4V4 [14-30]	1	1919.94	17
FALSE	High	Unambiguous	NRPPSADSSSGPPQAAPPLVNDRPVLGAPPGGPR	[R].NRPPSADSSSGPPQAAPPLVNDRPVLGAPPGGPR.[W]					1.76922e-05	0	1.578	1	1	5	731364181	731364181	731364181 [35-68]	0	3328.71	34
FALSE	High	Selected	SIGMHALILDR	[RK].SIGMHALILDR.[F]					0.176279	0.00596827	0.081	1	59	5	A0A0D9WT00	A0A1E5V2H3; I3T7P7; A0A1J3K3Y8; A0A1U7YYN5; A0A1U8AVH0; A0A0K9PS56; Q38700; A0A1S2XE20; W5H8I0; I1L152; A0A218XLE9; G7INC4; A0A2G9HI76; A0A0D9WT01; A0A1Z5RL38; A0A270R7D2; A0A078HLQ6; K7VXI7; A0A1J3CK75; C0HJ94; K3YUS4; A0A161XII4; 731343046; A0A1D6CRZ2; M0YTF7; A0A1S3ED29; W5HK61; A0A2K3MYE5; A0A1S2XGC5; A0A1S3EEA7; G5DX83; A0A0B2SS81; A0A1S2XH03; A0A0A9SYX0; A0A151QTQ3; R0GT05; A0A0E0Q1B4; A0A0…	A0A0D9WT00 [240-250]	0	1225.67	11
FALSE	High	Unambiguous	RGAGPVQQNQQPVPMMQQQMLPR	[R].RGAGPVQQNQQPVPMMQQQMLPR.[G]					0.000179776	0	1.201	1	1	2	731314870	731314870	731314870 [499-521]	1	2619.31	23
FALSE	High	Unambiguous	FKSELAHGANNGLDIAVR	[R].FKSELAHGANNGLDIAVR.[L]					0.114613	0.00257247	0.151	1	7	2	C3VQ49	Q96399; M9V5V2; C3VQ49; A1BQI2; Q6VM21; A3RLN1; E7E015	C3VQ49 [62-79]	1	1912	18
FALSE	High	Unambiguous	RQQSEPSGTAETLFGTIR	[R].RQQSEPSGTAETLFGTIR.[S]					0.000987611	0	0.924	1	2	1	731369266	A0A0J8BAC5; 731369266	731369266 [143-160]	1	1978	18
FALSE	High	Unambiguous	IFPGVAHGWTVR	[K].IFPGVAHGWTVR.[YH]					0.0128344	0	0.507	1	36	18	A0A0D9WG88	I1HJN3; A0A022RCR0; A0A022RD17; A0A1U8A5S1; A0A2P5E3S0; A0A1Q3CES8; A0A2P4IM47; A0A0D9WG88; A0A2P2J6W6; A0A0D9WG90; A0A2P5FWZ6; A0A2I4F3B2; A0A1R3GAE9; A0A2P5E3T3; A0A2I4F3A8; 731366873; A0A061ELE1; F6HDK7; A5B3K8; M0U160; A0A2I0X0A0; A0A1D1XLW9; A0A2N9HCC2; A0A2P2J6V5; A0A0A9DDU6; A0A2H3YRN4; W1PX30; A0A1D1XCN6; A0A2P5FWZ3; M0U161; W9SA73; A0A2P5FX11; B9SFP3; A0A2G5DMR2; D7T6Q0; A0A2G5DMN1	A0A0D9WG88 [498-509]	0	1339.73	12
FALSE	High	Unambiguous	HTPGTFTNQLQTSFSEPR	[R].HTPGTFTNQLQTSFSEPR.[L-]					0.000581948	0	1.01	3	163	12	I1P886; A0A0D9X1I2; L8AXE9	A0A2I0WG81; K4ACY4; A0A151SHX2; J3MMZ5; A0A1R3H6S3; A0A2P2K581; A0A0R0IZE4; A0A2R6PT00; A0A2H3XFT1; A0A1E5V3B9; A0A0E0I3N3; I1P886; A0A1J7HDL8; A0A0D2UGE0; A0A0E0EED0; A0A2K3MYD7; 731347955; A0A0D9X1I2; A0A2N9EXJ1; A0A1B6QFI3; A0A2G5DI66; A0A2C9UYL5; A0A2H3XIL6; A0A2G9GUG7; A0A2R6PV46; J3LKN4; A0A2K3JL02; A0A0E0D1U8; M0UCA3; A0A1R3HJW3; O80377; R9WXF0; A0A218W701; A0A1U8PQM6; A0A1S3VA58; A0A2P4IP…	I1P886 [39-56]; A0A0D9X1I2 [107-124]; L8AXE9 [12-29]	0	2047.98	18
FALSE	High	Unambiguous	NALHLLEVAGR	[R].NALHLLEVAGR.[TSEM]					0.0924168	0.00187066	0.186	1	60	1	A0A2P4H825	A0A2I4G627; A0A0K9QX52; D7KF65; A0A2P4H825; R0GR64; A0A059DC25; A0A0R0E4R5; I3T0Q4; A0A078FRU7; B9HGC2; A0A2C9VY95; A0A2P2KN07; A0A251NKL0; A0A2J6JW23; A0A2J6JW73; A0A251UMD0; A0A251UMK6; I1NCV1; A0A059DBS2; A0A0B2PF35; A0A2P4K040; A0A178W6V5; A0A2P4K043; A0A0D3DYV5; Q8LAC4; A0A059DBB0; A0A2C9VYC0; A0A078F9K3; A0A1R3J351; A0A0D2ZTZ8; A0A2P2KMX1; A0A0S3T0J1; A0A151RVJ6; A0A1S2Y1X6; A0A166G5U6; A0A…	A0A2P4H825 [322-332]	0	1192.68	11
FALSE	High	Unambiguous	NFAAGILR	[R].NFAAGILR.[T]					0.175198	0.00596827	0.082	1	1	1	A0A059A6Q9	A0A059A6Q9	A0A059A6Q9 [86-93]	0	861.494	8
FALSE	High	Unambiguous	RSLLNEDEYGFR	[R].RSLLNEDEYGFR.[KRT]					0.104513	0.00224036	0.166	1	74	2	731320939	A0A0K9QGA9; A0A2I0KKF8; A0A061EYQ8; A0A2I4FLS7; A0A0R0HMG3; A0A1U8FZ52; B9IPW4; K4BJE2; V4SS96; A0A022PTR7; A0A2P6SPX2; I1JAN9; A0A1J7IE92; A0A1U8K243; 731320939; A0A251RZ18; A0A2I4FLQ3; A0A151SD70; A0A1U8NU97; A0A1U8PWF1; C6SX21; A0A1S4B594; M5X2K0; A0A218X3X8; A0A200PSV9; A0A251QTD1; A0A2P5WVC7; A0A2P5XB59; A0A2P5BL32; A0A1S3VQD2; A0A2H5NSY2; A0A165ZPC8; M5XKZ7; A0A2N9HYK5; A0A2C9VAA6; A0A0D2U3…	731320939 [92-103]	1	1498.73	12
FALSE	High	Unambiguous	QFAPIVLR	[K].QFAPIVLR.[L]					0.163738	0.0044837	0.093	2	4	2	731337647; 1108934682	731337651; 1108929373; 731337647; 1108934682	731337647 [31-38]; 1108934682 [33-40]	0	943.572	8
FALSE	High	Unambiguous	FNMPTQHVIIR	[R].FNMPTQHVIIR.[H]					0.0257153	0	0.394	1	1	1	731321957	731321957	731321957 [288-298]	0	1355.73	11
FALSE	High	Unambiguous	SILPAQGNMSPGGFNRPGAGGMMPGMPGTR	[R].SILPAQGNMSPGGFNRPGAGGMMPGMPGTR.[K]					0.000638187	0	0.995	1	1	2	731352582	731352582	731352582 [471-500]	0	2943.38	30
FALSE	High	Selected	LNLPILPTTTIGSFPQTVELRR	[K].LNLPILPTTTIGSFPQTVELRR.[VAT]					0.00020206	0	1.182	1	99	3	1108923008	Q42662; A0A1S3ZYM9; V7CX68; I1MKZ0; G7L0I7; B8LPY2; A0A0A0LCI7; A0A1D6S491; A0A0S2IAX6; A0A0V0ISV3; V4M460; Q9LM03; A0A0R4J5Z8; D7LXP0; A0A0D2W516; A0A0B2R8K0; A0A1D5ZFW3; V4LDK3; C0P5Y3; A0A1D5ZFW4; A0A0S3RWJ6; 1108923008; R0GR46; A0A2K3P3F7; M4CA61; A0A1U8JA24; A0A059DI35; A0A2P5BK05; A0A0K9Q213; A0A0R0FQE0; A0A1D6KGM6; A0A1J3CHV9; G7L0I8; A0A2P5AYD1; A0A1J3I8W9; A0A151RFH6; D7L198; A0A068LJH6;…	1108923008 [436-457]	1	2466.41	22
FALSE	High	Unambiguous	TTGIVLDSGDGVSHTVPIYEGYALPHAILR	[R].TTGIVLDSGDGVSHTVPIYEGYALPHAILR.[LVI]					0.000806203	0	0.957	2	256	7	A0A089VH99; 731311844	P93375; A0A075D1U0; E3UU93; F8J142; P53494; A0A068FKL6; A0A089VH99; K7SLD7; D7R817; A2ZN74; P93376; A0A1Z2THY3; A0A2J6KMQ2; P30167; O81221; I1QXY9; B6TQ08; A0A251T1X6; A0A075D1A6; A0A2G9FZY4; P93374; A0A2J6KDU7; K7TH60; D1MAX1; A0A144KBS5; A0A1B6P5M1; Q2XTC1; A0A2H3XI76; Q7XZJ5; A0A0K0VH32; P30171; P46258; 731311844; G0ZS08; A0A218Y286; A0A172JFW7; Q1EML3; A0A2I4HQN6; A0A0A7LWK3; M1PY73; A0A0U5BH…	A0A089VH99 [150-179]; 731311844 [150-179]	0	3151.64	30
FALSE	High	Unambiguous	RGGGAPVQQSQQPIPMMQPQMLPR	[R].RGGGAPVQQSQQPIPMMQPQMLPR.[G]					9.30978e-05	0	1.308	1	1	7	731360293	731360293	731360293 [492-515]	1	2632.33	24
FALSE	High	Unambiguous	LTDLQHIFNPGGSGPR	[R].LTDLQHIFNPGGSGPR.[L]					0.00491706	0	0.663	1	1	4	731348048	731348048	731348048 [42-57]	0	1708.88	16
FALSE	High	Unambiguous	LHELAQSQLFEIR	[K].LHELAQSQLFEIR.[AT]					0.211997	0.00795661	0.051	1	34	4	M4F918	A0A0D2SSU2; A0A2P4GX67; V4LZW7; A0A0D3CIV7; A0A0B0NWG1; D7L8I5; A0A2I4GTH2; A0A2I0IIP8; A0A0D2RR46; A0A0D2RXZ3; A0A087HAM4; M4F918; M4E0M7; A0A251MW18; R0G3H4; A0A1J3FYG7; A0A1J3E6C1; A0A1U8HRG5; A0A0D2Q488; A0A0D3ACK4; A0A061G1Q3; A0A2P5SR80; M0S250; A0A061FU05; A0A078FFP3; A0A1U8I9L6; M5VPY4; A0A078G0K7; A0A078GGH6; 731333921; A0A0K9QE85; A0A061FV47; A0A218VYJ6; A0A2N9HJX6	M4F918 [866-878]	0	1583.85	13
FALSE	High	Unambiguous	IQTGVLRPFLPR	[K].IQTGVLRPFLPR.[K]					0.0964823	0.00187066	0.179	1	2	1	A0A0J8B761	A0A0J8E1V4; A0A0J8B761	A0A0J8B761 [52-63]	0	1396.84	12
FALSE	High	Unambiguous	YVRPVLGGSAEFPYPR	[K].YVRPVLGGSAEFPYPR.[R]					0.0116316	0	0.523	1	1	1	731327848	731327848	731327848 [216-231]	0	1807.95	16
FALSE	High	Unambiguous	VTNLSEDTREADLHELFR	[R].VTNLSEDTREADLHELFR.[ST]					0.00366015	0	0.711	1	6	6	731348810	A0A0D2RTL2; 731348810; A0A2P5QDD8; A0A0K9Q9K4; A0A0D2TEB2; A0A0K9RIT4	731348810 [211-228]	1	2145.06	18
FALSE	High	Unambiguous	TQDGNIVLFRPEENAMR	[R].TQDGNIVLFRPEENAMR.[M]					0.00892869	0	0.566	1	1	7	731339333	731339333	731339333 [142-158]	0	1989.98	17
FALSE	High	Unambiguous	NLTLLLEIDLSNNR	[K].NLTLLLEIDLSNNR.[F]					0.0792459	0.000962316	0.211	1	1	5	A0A0K9NU15	A0A0K9NU15	A0A0K9NU15 [179-192]	0	1627.9	14
FALSE	High	Unambiguous	VGLTGLTVAEHFR	[R].VGLTGLTVAEHFR.[DNF]					0.00344183	0	0.721	4	251	9	A0A2P4LXF3; M0UCJ4; 731341013; A0A175YRR8	A0A287GJ54; A0A0A0KTA5; F2D5B2; O82722; W5DDM7; A0A0D2VYM2; A0A1J7HJE4; A0A061E5Q6; A0A0A0KPJ2; A0A2H3XR79; A9NUR7; A0A1U8FHC9; A0A0K9NYL5; A0A1D5VBW3; A0A2P4LXF3; A0A0D2S1Z3; K3Z538; A0A059BEJ4; A0A2I0KLL8; A0A287LBT9; P37399; A0A1U8EIM6; A0A1D5SCJ1; A0A1E5WI54; A0A0D2V4L6; A0A0D2VYM6; A0A0V0IJL8; A0A1J6K2R3; A0A2J6LIR9; B8A7M8; A0A0E0L5G3; A0A1U8FNM3; P19023; A0A2G5F6M9; A0A0S3SM21; A0A1U8F1W2;…	A0A2P4LXF3 [532-544]; M0UCJ4 [336-348]; 731341013 [306-318]; A0A175YRR8 [172-184]	0	1399.77	13
FALSE	High	Unambiguous	QAILHSDQELYNGGSTDALVR	[K].QAILHSDQELYNGGSTDALVR.[T]					0.00286194	0	0.751	1	1	4	731316487	731316487	731316487 [262-282]	0	2287.13	21
FALSE	High	Unambiguous	ARFEELNNDLFR	[R].ARFEELNNDLFR.[K]					0.194508	0.00652397	0.065	2	251	1	731321538; A0A1D6S6U2	A0A067GMJ3; C1MKE9; A0A199V7A7; A0A2G5DZJ7; T1LDI8; A0A2G5DZJ1; A0A0D2S5H2; Q0ZUG6; A0A2P2M7P8; A0A1E5UVF4; B7U9Z3; A0A0D3B5D7; Q42434; A0A0D2SCP7; A0A2K2B732; F2D269; A0A022PZK2; A0A164WV60; J3L0X4; A0A140B499; A0A1D6S8R6; A0A0D3CTE5; K3XRL2; A0A2G3CX17; A0A1D6SA79; A0A1U8AUK4; A0A2P2M7N9; Q587K1; A0A067KI98; F2CS54; F6H7B3; A0A2K1Y7F8; A0A2P5WX97; O24581; A0A0D2T7I3; A0A059C3Q0; V4NKC9; A0A061G…	731321538 [331-342]; A0A1D6S6U2 [330-341]	1	1523.76	12
FALSE	High	Unambiguous	IESLDPAXLRPGR	[R].IESLDPAXLRPGR.[I]					0.00967187	0	0.553	1	219	9	M8ATV1	A0A0B2SXH6; A0A2I4GA16; A0A0D3DGQ3; M4D1J2; A0A0E0CZA1; A0A0P0VX70; A4RUH0; A0A0R4J4W3; A0A2P5C376; A0A1U8E6Q8; A0A2G2YSI6; A0A176WL91; M1BS59; A0A0D2R2B9; K3ZTA6; A0A0V0I8R8; A0A1E5UR55; A8IHB3; V4MN77; A0A0K9Q9B5; A0A0E0KCL1; A0A2P2K5K8; A0A1U8LBX6; I3SQP5; A0A1U8H278; A0A072VKU9; A0A1R3GDP6; A0A0B0P9P0; B6T2S0; A0A0D9X381; K4CAL7; A0A2I4FHR3; A0A1Q3B7H4; A0A2N9HEC2; A0A1S4CHP1; I0YQV4; A0A078J…	M8ATV1	0	1436.82	13
FALSE	High	Unambiguous	THLVTTPGSGFGPGGEGFVR	[K].THLVTTPGSGFGPGGEGFVR.[V]					0.000278208	0	1.13	1	1	4	731317741	731317741	731317741 [424-443]	0	1972.99	20
FALSE	High	Unambiguous	EHGINFIGPNPDSIR	[RK].EHGINFIGPNPDSIR.[VI]					0.00217004	0	0.796	1	61	5	A0A0K9RHG8	A0A251RV70; H9CCH6; A0A0V0II34; O81273; B9S1E2; A0A2H3YFY3; M0TTB7; A0A1S3BM82; B9N843; D2CFM8; G8FGI3; A0A251VS06; A0A2G2XSL7; A0A2P5E2Y5; Q40475; A0A068VC76; A0A218XPY0; E6Y6R4; A0A1S4AWE8; O23960; A0A2I4GEC5; A0A200R9G4; A0A2P5CLA3; A0A2K1ZYM6; V4U0R4; C5ILA9; A0A2K3PG06; A0A2K1ZYM0; F6H9P9; A0A1D1YBB4; A0A1S2YEA7; Q9LLR1; A0A2G9HCJ0; A0A118JY69; A0A2G3AYC3; A0A022R4R3; M1BCQ9; A0A2K1X0W6; 731…	A0A0K9RHG8 [165-179]	0	1665.83	15
FALSE	High	Unambiguous	WYEPHSPNPIDVDAAR	[K].WYEPHSPNPIDVDAAR.[T]					0.00628845	0	0.623	1	1	5	1108945887	1108945887	1108945887 [316-331]	0	1866.88	16
FALSE	High	Unambiguous	RSLGYGYVNFANPQDAAR	[R].RSLGYGYVNFANPQDAAR.[A]					8.23228e-05	0	1.328	1	2	2	731360293	731360293; A0A087GJJ0	731360293 [77-94]	1	1998.98	18
FALSE	High	Unambiguous	NTVPLHPYGWTALR	[KR].NTVPLHPYGWTALR.[F]					0.00949506	0	0.556	1	22	3	731338940	A0A2P4KRX5; A0A0K9Q7I6; A0A2P4M0A1; A0A1Q3D312; A0A0K9NMH1; A0A2I4G4E8; A0A1S3B151; A0A1R3GD52; A0A2P4LVL3; 731338940; A0A1R3K1Y0; A0A0A0KK62; A0A067JYI5; Q9ZR60; A0A2P4M006; A0A2P4LW82; A0A2P4M0G9; A0A061DQJ0; A0A2P6Q887; A0A2I0ARI0; A0A2I0WFA9; A0A2I0W734	731338940 [522-535]	0	1624.86	14
FALSE	High	Unambiguous	VLTRPVASTLPTIYR	[R].VLTRPVASTLPTIYR.[T]					0.00315789	0	0.735	1	2	5	731326049	731369127; 731326049	731326049 [105-119]	0	1686.99	15
FALSE	High	Unambiguous	ISVTGAGGFIGSHIAR	[R].ISVTGAGGFIGSHIAR.[R]					0.00170727	0	0.835	2	14	2	A0A0K9QGV0; W5A066	A0A287GML3; M0W5U3; M0W5U4; A0A1D5SCT6; A0A2I0HY15; A0A287HJW7; A0A0K9QGV0; 731328025; W5A066; M8BXQ1; A0A218X5Q2; A0A199VV65; A0A1D5SCT9; A0A0C4BIT2	A0A0K9QGV0 [30-45]; W5A066 [151-166]	0	1542.84	16
FALSE	High	Unambiguous	NLHMGEATAFGPSGGLPR	[R].NLHMGEATAFGPSGGLPR.[M]					0.0183354	0	0.449	1	1	1	1108957645	1108957645	1108957645 [1297-1314]	0	1811.89	18
FALSE	High	Unambiguous	ISGFEGDNMIER	[-].ISGFEGDNMIER.[S]					0.0101596	0	0.545	1	1	2	H1ZY49	H1ZY49	H1ZY49 [1-12]	0	1367.63	12
FALSE	High	Unambiguous	VSEGAGLDYSDIPHSQIR	[K].VSEGAGLDYSDIPHSQIR.[K]					0.00150041	0	0.856	1	2	8	731361346	731361348; 731361346	731361346 [310-327]	0	1943.95	18
FALSE	High	Unambiguous	DVGYGGQMLADSMARPVR	[R].DVGYGGQMLADSMARPVR.[E]					0.0663009	0.000962316	0.24	1	1	1	731313469	731313469	731313469 [117-134]	0	1922.92	18
FALSE	High	Unambiguous	NTVNQLAQQVDREEFR	[R].NTVNQLAQQVDREEFR.[N]					0.0466955	0	0.297	1	4	2	1108865121	1108865121; A0A0J8B373; A0A0J8DX51; A0A0K9QZI7	1108865121 [771-786]	1	1946.97	16
FALSE	High	Rejected	WKLIKAHGSAVGLPTEDDMGNSEVGHNALGAGR	[K].WKLIKAHGSAVGLPTEDDMGNSEVGHNALGAGR.[I]					0.00652483	0	0.617	0	2	1		A0A0D6R7Z3; A0A0C9SAQ5		2	3387.69	33
FALSE	High	Selected	WRLVKAHGTAVGLPSDDDMGNSEVGHNALGAGR	[KR].WRLVKAHGTAVGLPSDDDMGNSEVGHNALGAGR.[I]					0.0027924	0	0.755	1	28	1	M8BTU2	M8BTU2; A0A287LW87; W5D322; B8A306; A0A1D5VD89; K3XFX0; A0A287LWA8; A0A1D5VD86; K3YSM2; A0A1D6G992; J3L589; A0A1D6N8I0; B6TGG2; M7YLI9; C0HHU2; A0A1D6G993; A0A287LWA2; A0A287LW69; A0A1D5WKF5; A0A151RIP9; A0A1D5VD88; A0A1D5VXI5; A0A1D6N8I1; M0WLI6; P30792; A0A287LW72; A0A1D5WKF4; A0A287LW82	M8BTU2 [92-124]	2	3387.66	33
FALSE	High	Unambiguous	QYVHLLNSTLTATER	[K].QYVHLLNSTLTATER.[T]					0.0116316	0	0.523	1	68	1	A0A2P5Q4J8	A0A2G2V9M8; A0A1S2XWS5; A0A0C9RZ24; A0A0K9QJ89; A0A067EWG5; A0A2I0L0E3; A0A2P6RR38; A0A2P5XXP7; A0A2C9WI85; A0A1S3V981; A0A2P5RRA3; A0A2H5MVE5; 731336519; A0A0B0NK17; I3TA49; A0A2P5B587; B9S1Q1; A0A2K3K2Z9; V4T539; A0A1U8JLZ3; A0A1U8A2P2; A0A1U8E162; U5D8N7; A0A1Q3B5X5; A0A0D2ME25; A0A2P5Q4J8; I1NIY6; A0A1U8LAQ9; A0A1U8B9T8; D7U1Z6; A0A0D6QWB2; A0A2G3BUE1; A0A218XL20; A0A2P5W0G7; A0A2P6R6X1; A0A2…	A0A2P5Q4J8 [457-471]	0	1745.92	15
FALSE	High	Unambiguous	YAALGTPTLYDHPDSLYGREPMR	[R].YAALGTPTLYDHPDSLYGREPMR.[G]					0.000234198	0	1.158	1	1	1	731373300	731373300	731373300 [221-243]	1	2623.26	23
FALSE	High	Unambiguous	SGNIQILTSHTLQPVPIAIGGPGLSPGVR	[K].SGNIQILTSHTLQPVPIAIGGPGLSPGVR.[F]					0.000316562	0	1.109	1	1	11	731344436	731344436	731344436 [492-520]	0	2879.61	29
FALSE	High	Unambiguous	VFVDAGPTGPTHWENVEVR	[K].VFVDAGPTGPTHWENVEVR.[L]					9.65973e-05	0	1.302	1	1	5	731352543	731352543	731352543 [118-136]	0	2110.04	19
FALSE	High	Unambiguous	INIPRPLSAVMSAR	[K].INIPRPLSAVMSAR.[H]					0.0837559	0.000962316	0.202	1	1	2	731362823	731362823	731362823 [154-167]	0	1524.87	14
FALSE	High	Unambiguous	SLPPLLEATPNAVHELTLAR	[R].SLPPLLEATPNAVHELTLAR.[E]					5.79797e-05	0	1.385	1	1	4	A0A0J8B9E3	A0A0J8B9E3	A0A0J8B9E3 [43-62]	0	2142.19	20
FALSE	High	Unambiguous	MSSNPVILQSENLTKYILETSVYPR	[-].MSSNPVILQSENLTKYILETSVYPR.[E]					0.0638989	0.000962316	0.246	1	2	3	C6TJP5	C6TJP5; I1KPT4	C6TJP5 [1-25]	1	2882.5	25
FALSE	High	Unambiguous	SGNVQILTSHTLQPVPIAIGGPGLSPGVR	[K].SGNVQILTSHTLQPVPIAIGGPGLSPGVR.[F]					0.000150409	0	1.23	1	1	5	731310533	731310533	731310533 [492-520]	0	2865.59	29
FALSE	High	Unambiguous	VVSNFIAQALRDEPLTVQAPGSQTR	[R].VVSNFIAQALRDEPLTVQAPGSQTR.[S]					0.000290446	0	1.123	1	1	8	731349068	731349068	731349068 [215-239]	1	2697.43	25
FALSE	High	Unambiguous	LNDHFPLVVWQTGSGTQSNMNANEVIANR	[K].LNDHFPLVVWQTGSGTQSNMNANEVIANR.[A]					3.09627e-05	0	1.487	1	75	2	A0A0D3BNG7	A0A1J6IDF2; A0A251UH44; A0A2G3CTJ3; A0A178UN34; B9SAW4; W9RTY2; K4C411; A0A2P5X9B1; A0A1S4DL97; A0A1J3CP81; I1JBJ2; A0A1R3IHF8; B9DFH4; A0A2H5NLG8; A0A1J3GZD4; A0A1Q3BVU0; A0A1U8G367; A0A0B2PHH7; A0A2C9W4Z5; A0A2I4EZH8; A0A1S3WYC1; V4L6T9; A0A067H537; A0A022S1W8; Q43180; M4CJR6; A0A1S2XX87; A0A1U7WUB3; A0A2G9I333; V4VWH7; B9DFR5; K4CVC2; A0A1P8BDR1; A0A068V8X4; A0A061DYX0; A0A067H5H3; A0A0B0PVV4;…	A0A0D3BNG7 [766-794]	0	3212.55	29
FALSE	High	Unambiguous	AHGEQNILPSFAQFLQR	[R].AHGEQNILPSFAQFLQR.[I]					0.0247837	0	0.4	1	1	1	731344680	731344680	731344680 [212-228]	0	1956.01	17
FALSE	High	Unambiguous	FRDLANSVPLATDEEPSTTDAVATFR	[K].FRDLANSVPLATDEEPSTTDAVATFR.[G]					0.000135478	0	1.247	1	4	3	731346220	Q42652; A6ZEA3; Q94G60; 731346220	731346220 [795-820]	1	2823.38	26
FALSE	High	Unambiguous	VIVAIENPQDIIVQSARPYGQR	[R].VIVAIENPQDIIVQSARPYGQR.[A]					0.00103742	0	0.916	1	213	5	A0A0D9X1I2	A0A2I0WG81; K4ACY4; A0A2P2K532; A0A151SHX2; M8CAC7; W5BPU1; M7ZI55; A0A2P2K581; A0A2G2WM66; A0A0R0IZE4; A0A1D5XDZ3; A0A078G5S4; A0A2R6PT00; A0A2H3XFT1; A0A1E5V3B9; A0A0E0I3N3; A0A0D2UGE0; A0A0E0EED0; A0A2G3AW33; A0A0D3AQ29; 731347955; A0A0D9X1I2; A0A1B6QFI3; A0A2H3XIL6; A0A2G9GUG7; A0A2R6PV46; J3LKN4; A0A0E0D1U8; M0UCA3; A0A1R3HJW3; A0A218W701; A0A1U8PQM6; A0A2G3C9Z9; A0A1W5RML9; A0A1S3VA58; B9DG…	A0A0D9X1I2 [68-89]	0	2466.35	22
FALSE	High	Unambiguous	LAAGEPDFDTPSVIAEAGINAIHEGHTR	[R].LAAGEPDFDTPSVIAEAGINAIHEGHTR.[Y]					4.13403e-05	0	1.44	1	1	6	A0A0J8E360	A0A0J8E360	A0A0J8E360 [103-130]	0	2888.42	28
FALSE	High	Unambiguous	ESILLSGGPYYNLPLGRR	[R].ESILLSGGPYYNLPLGRR.[D]					0.0194984	0	0.439	1	1	8	731313641	731313641	731313641 [140-157]	1	2005.09	18
FALSE	High	Unambiguous	QVKAMQDPEIQNILSDPIMR	[R].QVKAMQDPEIQNILSDPIMR.[Q]					0.000928702	0	0.934	1	1	8	A0A1U8ABL7	A0A1U8ABL7	A0A1U8ABL7 [518-537]	1	2326.19	20
FALSE	High	Unambiguous	VTNPTLSPAHLEDLPGFTR	[K].VTNPTLSPAHLEDLPGFTR.[S]					0.0349736	0	0.344	1	1	2	731332324	731332324	731332324 [50-68]	0	2065.07	19
FALSE	High	Unambiguous	TINVPEGFDYELYNRNDINR	[KR].TINVPEGFDYELYNRNDINR.[I]					0.00850003	0	0.574	1	11	8	I1J637	A0A1S4CVB2; I1J637; 731366792; A0A0K9R870; A0A2I0W2P2; A0A218XZ72; A0A200QVT2; I3SIM7; A0A2C9VNW9; A0A0V0I083; C6TD94	I1J637 [55-74]	1	2442.17	20
FALSE	High	Unambiguous	QMGLTDQDIVALSGGHTLGR	[K].QMGLTDQDIVALSGGHTLGR.[C]					0.000369176	0	1.084	1	6	6	731355965	Q42459; A0A022RBB3; Q94CF7; 731355965; A0A0K9RD46; A0A022R876	731355965 [148-167]	0	2069.04	20
FALSE	High	Unambiguous	VLGAWPSPFVMRPR	[K].VLGAWPSPFVMRPR.[I]					0.0146938	0	0.485	1	3	5	1108931852	A3FF38; A0A0K9QQX9; 1108931852	1108931852 [937-950]	0	1612.88	14
FALSE	High	Unambiguous	NTFVAKGLSVGDMVALSGAHSIGR	[K].NTFVAKGLSVGDMVALSGAHSIGR.[A]					0.179562	0.00596827	0.078	1	1	3	A0A2J6JW38	A0A2J6JW38	A0A2J6JW38 [167-190]	1	2387.25	24
FALSE	High	Unambiguous	FKDVGLNETTDVVALSGGHTIGR	[K].FKDVGLNETTDVVALSGGHTIGR.[S]					0.00350593	0	0.718	1	1	24	A0A1E5W9Q1	A0A1E5W9Q1	A0A1E5W9Q1 [170-192]	1	2386.24	23
FALSE	High	Unambiguous	RGWDAQVLGEAPYQFR	[K].RGWDAQVLGEAPYQFR.[N]					0.0058771	0	0.634	1	1	1	731344436	731344436	731344436 [223-238]	1	1892.94	16
FALSE	High	Unambiguous	QMGLNDQDIVALSGGHTLGR	[K].QMGLNDQDIVALSGGHTLGR.[C]					3.54486e-05	0	1.465	1	1	11	731359393	731359393	731359393 [148-167]	0	2082.04	20
FALSE	High	Unambiguous	NDFTPEEEEEVRRENQWAFE	[KR].NDFTPEEEEEVRRENQWAFE.[-]					0.0180002	0	0.452	1	180	9	F6I100	I1ZBR1; A9RG78; A0A2I0AVR5; A0A2H3Z0X8; G7KSZ5; I1QQU3; A0A2P5QTC6; C6T533; A0A151U7X9; A0A200QFX5; C1ECD1; A0A218WQQ6; C6SVG3; C5X6W1; A7KZP6; A0A0R0HM17; A0A2G5DME2; A0A2J7ZRM4; A0A2P4KPS4; A0A2H3ZCJ2; A0A0K9PMN4; A0A059ASF0; A0A0S3R461; A0A2G5D6E5; A0A1S3VSN6; A0A2K1L0C6; B9R8D3; A0A199VJU9; A0A2K1IUG6; A0A1Q3ALV3; A0A1S3BI15; A0A2G5CBH4; A0A2I4EKZ9; A0A0C9RQB3; A9NX34; 731338602; A0A1J3CQQ0; …	F6I100 [419-438]	2	2554.11	20
FALSE	High	Unambiguous	LLSGPAVAALSHIAGR	[R].LLSGPAVAALSHIAGR.[M]					0.00136819	0	0.871	1	4	5	1108865121	1108865121; A0A0J8B373; A0A0J8DX51; A0A0K9QZI7	1108865121 [303-318]	0	1532.89	16
FALSE	High	Unambiguous	LSSLNHHAASSLTTPNADLSR	[R].LSSLNHHAASSLTTPNADLSR.[A]					0.0802267	0.000962316	0.209	1	1	2	731348270	731348270	731348270 [54-74]	0	2192.11	21
FALSE	High	Unambiguous	NPATITTDDFVYTGFRGER	[K].NPATITTDDFVYTGFRGER.[T]					0.00165557	0	0.84	1	4	5	731372227	731372231; 731372227; A0A0J8B5D5; A0A0J8B8Q9	731372227 [52-70]	1	2160.04	19
FALSE	High	Unambiguous	SVVAQFNADQLLTERPR	[K].SVVAQFNADQLLTERPR.[V]					0.000492911	0	1.037	1	1	6	731342065	731342065	731342065 [133-149]	0	1944.03	17
FALSE	High	Unambiguous	SAQDIALAELAPTHPIR	[K].SAQDIALAELAPTHPIR.[L]					0.0020406	0	0.806	3	79	18	731315739; W9RXJ7; 731367897	M0S8E8; A0A0J9YZP8; A0A2G3D1U8; B6RF02; E3VVV8; 731315739; A0A1B1V4Y4; A0A2G3A4B6; A0A2I0AD41; D4P505; A0A0V0HQS7; G9CEG4; I3T321; Q9SP07; A0A0V0HTE5; A0A0B0P5X0; A0A2H3XB90; E3U8N9; F6MFF1; A0A1S3C1Y8; A0A1E1F9A5; A0A059ADY5; A0A0A7A5H5; Q75ZE0; Q5UFR1; G9CEH8; M5XDY9; G9CEM9; Q75ZD9; H6TNP2; A0A2H3YYU3; M0TGC0; W9RXJ7; M9WMF4; A0A2R4N521; A0A1U8AE29; M0UC09; G9CE81; A0A0C9RIN9; A0A2H3WXD6; P932…	731315739 [159-175]; W9RXJ7 [259-275]; 731367897 [160-176]	0	1802.98	17
FALSE	High	Unambiguous	ISGVSDYFAEDELHALHTGR	[K].ISGVSDYFAEDELHALHTGR.[SN]					0.00363771	0	0.712	1	2	1	731360474	A0A0K9Q8H1; 731360474	731360474 [279-298]	0	2217.06	20
FALSE	High	Unambiguous	NFRPESLLGEGGFGR	[RK].NFRPESLLGEGGFGR.[V]					0.190952	0.00652397	0.068	1	16	1	A0A1Z5R592	A0A1Z5R525; A0A0K9Q987; 731373558; A0A200QGH7; A0A022S2R6; A0A103XRM2; M0T7A5; A0A067JSB9; A0A1E5UXD6; F6HDG9; K3ZDB0; A0A0V0IQX8; K4AWY9; A0A1Z5R592; S8CU36; A0A059B5Z1	A0A1Z5R592 [251-265]	0	1635.82	15
FALSE	High	Unambiguous	TRPSVSFTDEEIQELTVR	[K].TRPSVSFTDEEIQELTVR.[I]					0.211997	0.00795661	0.051	1	2	1	A0A218VXT3	A0A2I0K3Z9; A0A218VXT3	A0A218VXT3 [282-299]	0	2107.07	18
FALSE	High	Unambiguous	HTGNISLDDVIEIAR	[K].HTGNISLDDVIEIAR.[VI]					0.0172417	0	0.459	1	5	3	731345787	A0A2R6R826; A0A1U7ZX27; A0A2R6R7Z9; 731345787; 731356205	731345787 [101-115]	0	1652.86	15
FALSE	High	Unambiguous	LLSIERNPPIEEVVQSGVVPR	[K].LLSIERNPPIEEVVQSGVVPR.[L]					0.000110593	0	1.28	1	2	3	731346765	A0A0K9QZT7; 731346765	731346765 [101-121]	1	2331.3	21
FALSE	High	Unambiguous	FGVTREEQDQAAVESHR	[R].FGVTREEQDQAAVESHR.[K]					0.000530664	0	1.025	1	3	5	731368458	A0A0U2QGB6; 731368458; A0A0K9QAS3	731368458 [207-223]	1	1958.93	17
FALSE	High	Unambiguous	TGPGDRPLAEIR	[K].TGPGDRPLAEIR.[L]					0.14214	0.00292848	0.116	1	2	2	731361368	A0A0K9S3U7; 731361368	731361368 [136-147]	0	1281.69	12
FALSE	High	Unambiguous	YLNHDGVDMHSGLQQR	[R].YLNHDGVDMHSGLQQR.[R]					0.000957704	0	0.929	1	1	3	731322733	731322733	731322733 [96-111]	0	1869.87	16
FALSE	High	Unambiguous	THPVNFLNER	[K].THPVNFLNER.[T]					0.0837559	0.000962316	0.202	1	69	16	A0A0R0JL19	C6TD82; F6K5V5; A0A0R0JL19; A0A1S6EFB6; G0Z9K5; G8XQZ2; G8JZ50; M5VM41; A0A160G5Z8; G0Z9J7; G0Z9K1; A0A1R3KFZ9; Q9ZT38; G0Z9K3; A0A1R3FXK8; M5VZ38; I1KAJ5; A0A2P5XJW7; A0A1U8L540; G0Z9K4; A0A0B2SJ43; G0Z9J9; I1KAJ4; F5BX16; A0A251MUU9; I3SES8; M0TUQ0; A0A1S3VVM7; G0Z9K0; Q42764; A0A2H3YHV5; A0A2P5DMG5; A0A191QLA2; Q684J9; Q43015; A0A0R0JM61; G8JZ51; A0A1J7IHR9; A0A089NF79; A0A2P5XJU4; G0Z9J6; A0A…	A0A0R0JL19 [308-317]	0	1226.63	10
FALSE	High	Rejected	AGALGDSVTISR	[K].AGALGDSVTISR.[ED]					0.091287	0.00187066	0.188	0	2	1		A0A2N9FQ88; A0A1R3H0R8		0	1146.61	12
FALSE	High	Unambiguous	HVPLTIAGTR	[KR].HVPLTIAGTR.[I]					0.0515241	0	0.281	1	29	4	1108906996	A0A1S4D091; A0A287Y0K5; A0A2G2ZH00; M0YB08; A0A1R3I607; 1108906996; M1CVV1; A0A1R3FXG5; A0A2G2W4T9; B7FGQ6; M0YB07; A0A2G3CF74; A0A287Y058; M0YB06; K4BNY4; A0A2N9FU01; A0A061EYU1; A0A1U7Z4L0; A0A200QJS8; A0A2P4LB33; A0A0V0HCH2; A0A2P5XDW1; A0A0D2VTM4; W1NWA0; A0A1J6K0V3; I3SFU5; A0A218X996; A0A097H1F0; A0A2N9ISM3	1108906996 [134-143]	0	1064.62	10
FALSE	High	Unambiguous	DPLFYSHHANVDR	[KR].DPLFYSHHANVDR.[MLT]					0.0309258	0	0.364	1	46	4	731350558	D8R5R6; B6ST03; A0A162A591; A0A2R6WDA8; A0A164ZTV5; D8SFY9; A0A176VEH7; A0A2R6WA03; A0A2R6WJJ9; A0A2R6WJ96; A0A2R6VZB5; A0A0R0JCW2; A0A2R6WMN9; A0A270R4T3; 731350558; A0A022R5P3; A0A1E5UM04; A0A0B2PDF7; A0A151R8K1; A0A0B2PI85; C5YIC4; B8YI28; A0A176W8E6; A0A172MLG4; A0A164WC69; A0A1Z5R8F8; A0A2R6X7A4; A0A176W8I4; B7ZZ57; A0A2R6WNN9; A0A2R6X796; I6XNI6; 1108961635; A0A2R6W9Y9; A0A2P6Q3W0; A0A270R4…	731350558 [356-368]	0	1570.74	13
FALSE	High	Unambiguous	TRPPTMQGFAQNANR	[K].TRPPTMQGFAQNANR.[I]					0.000477984	0	1.042	1	1	4	731360652	731360652	731360652 [97-111]	0	1688.83	15
FALSE	High	Unambiguous	RNSSLEGLQTNVQR	[R].RNSSLEGLQTNVQR.[L]					0.110461	0.00224036	0.157	1	1	1	731332983	731332983	731332983 [102-115]	1	1601.84	14
FALSE	High	Unambiguous	SVFHPGSNINTR	[R].SVFHPGSNINTR.[NTG]					0.105806	0.00224036	0.164	1	5	2	731350277	731350277; 1108961112; A0A0K9QCP5; A0A1J3GLU2; A0A1J3G2E5	731350277 [83-94]	0	1328.67	12
FALSE	High	Unambiguous	SHQMLQQEQLQAR	[R].SHQMLQQEQLQAR.[Q]					0.00799302	0	0.584	1	2	2	731343067	731343069; 731343067	731343067 [973-985]	0	1596.79	13
FALSE	High	Unambiguous	MEMLQHEAQEEESRR	[K].MEMLQHEAQEEESRR.[I]					0.0381183	0	0.33	1	1	1	731351234	731351234	731351234 [373-387]	1	1902.84	15
FALSE	High	Unambiguous	ASAAAASVPHTHEEENELER	[R].ASAAAASVPHTHEEENELER.[A]					0.00451141	0	0.677	1	1	1	731345040	731345040	731345040 [6-25]	0	2148	20
FALSE	High	Unambiguous	LRNQVEAPIR	[R].LRNQVEAPIR.[I]					0.061584	0.00054243	0.252	1	1	2	731354496	731354496	731354496 [60-69]	1	1195.69	10
FALSE	High	Unambiguous	VGYKPDTINFIPISGWNGDNMLER	[K].VGYKPDTINFIPISGWNGDNMLER.[S]					0.173057	0.00596827	0.084	1	1	4	F2DPR2	F2DPR2	F2DPR2 [182-205]	0	2736.35	24
FALSE	High	Rejected	ATSSLLGVPLGHNSSFLQGPAFAPPR	[K].ATSSLLGVPLGHNSSFLQGPAFAPPR.[I]					0.000772232	0	0.964	0	3	4		A0A059C4B6; A0A2K3NTZ9; A0A059C3U5		0	2621.38	26
FALSE	High	Rejected	ASSTLLGVPLGHNSSFLQGPAFAPPR	[K].ASSTLLGVPLGHNSSFLQGPAFAPPR.[I]					0.000658117	0	0.99	0	1	4		A0A251LVH3		0	2621.38	26
FALSE	High	Selected	ASTSLLGVPLGHNSSFLQGPAFAPPR	[K].ASTSLLGVPLGHNSSFLQGPAFAPPR.[I]					0.000642124	0	0.994	1	10	4	D7M7R5	A0A087GQF4; D7M7R5; Q9AUE2; M0SYH5; A0A0D3B8E0; M0SPW9; M4C8Y1; R0H828; P46637; 731361175	D7M7R5 [63-88]	0	2621.38	26
FALSE	High	Unambiguous	VAQSSIISNLDHVIIR	[R].VAQSSIISNLDHVIIR.[L]					0.000762792	0	0.966	1	1	2	731356250	731356250	731356250 [250-265]	0	1765	16
FALSE	High	Selected	VDFTPYGLNPPHIHPR	[R].VDFTPYGLNPPHIHPR.[A]					0.00389232	0	0.701	1	1	2	731329309	731329309	731329309 [98-113]	0	1859.96	16
FALSE	High	Selected	IDYAPYGLNPPHIHPR	[R].IDYAPYGLNPPHIHPR.[A]					0.00470987	0	0.67	1	3	2	A0A2G9GJH6	A0A2G9GJH6; A0A218WER0; A0A2G9HBT8	A0A2G9GJH6 [100-115]	0	1859.96	16
FALSE	High	Unambiguous	HAVQLLSPASIIAR	[R].HAVQLLSPASIIAR.[M]					0.0237394	0	0.407	1	1	7	731332537	731332537	731332537 [404-417]	0	1475.87	14
FALSE	High	Rejected	DIVALSGAHTVGR	[R].DIVALSGAHTVGR.[A]					0.0687931	0.000962316	0.234	0	1	1		A0A2P6V415		0	1295.71	13
FALSE	High	Selected	DIVALSGAHSLGR	[KR].DIVALSGAHSLGR.[A]					0.0162133	0	0.469	1	2	2	1108934682	1108934682; A0A251S3E5	1108934682 [154-166]	0	1295.71	13
FALSE	High	Unambiguous	LFVGDPVWTPHNRPNDELPAR	[R].LFVGDPVWTPHNRPNDELPAR.[K]					0.174124	0.00596827	0.083	1	1	1	731364076	731364076	731364076 [188-208]	0	2430.23	21
FALSE	High	Selected	LDFAVGGVIPVHSHR	[R].LDFAVGGVIPVHSHR.[T]					0.0112102	0	0.529	1	5	3	A0A0K9QJX0	A0A0K9QLH3; A0A0K9RAI3; A0A0K9RZJ8; W8S9T6; A0A0K9QJX0	A0A0K9QJX0 [91-105]	0	1603.87	15
FALSE	High	Unambiguous	LDFGLGGVIPVHSHR	[R].LDFGLGGVIPVHSHR.[T]					0.00636628	0	0.621	2	6	8	731320497; 731320511	Q9FPQ1; 731320513; 731345495; 731320497; 731320511; 731320507	731320497 [91-105]; 731320511 [92-106]	0	1603.87	15
FALSE	High	Unambiguous	MNVHPDVNFEELAR	[K-].MNVHPDVNFEELAR.[SFL]					0.00197881	0	0.811	1	123	4	A0A0D3AFH6	A0A1S3BXR3; A0A2P4IVN3; A0A1U8KXA1; K4CJL9; A0A2P6R773; A0A2P5BTN1; A0A1J6KAN3; Q9SEI2; Q9AYS9; C6TAN1; A0A1R3IVY9; W1NFN2; A0A2G9I2R0; A0A2K3JK43; A0A2G9GXL1; M4CAC3; A0A2P2MLD8; A0A0A0LJT3; A0A251TAX4; A0A061FAI4; D7T6C5; A0A2P2MLB5; W9RKL9; A0A1S4B2Z0; A0A2C9VD34; A0A1R3K886; I1LBA2; V7BIW3; A0A2G2W555; A0A2H5PYI9; A0A2P5RYH9; V4M0C1; A0A0A0LWD4; A0A166I3E3; A0A218WI16; A0A199USN4; A0A087H760;…	A0A0D3AFH6 [844-857]	0	1670.8	14
FALSE	High	Rejected	DPLFYAHHANVDR	[RK].DPLFYAHHANVDR.[MTVI]					0.0185623	0	0.447	0	27	2		M1BMR4; I4DD59; A0A2P5A5C5; R9RHI4; 731350564; B9VNV4; A0A068VB21; A0A2K3MW33; A0A1U7Z3Y9; A0A1S3BFK3; A0A2K3M9I6; A0A0D2UIJ1; A0A172DC01; G4U404; Q84YI1; B2BX66; Q6UIL3; Q84YI0; V7CMC6; A0A251S095; L7UVM0; K4CMI7; A0A0E0JPQ3; A0A2L0RIT5; A0A068UEP3; I4DD55; O81103		0	1554.74	13
FALSE	High	Unambiguous	HIPNAQSLAAPLLR	[K].HIPNAQSLAAPLLR.[M]					0.0125225	0	0.511	1	1	8	A0A0J8B6A2	A0A0J8B6A2	A0A0J8B6A2 [50-63]	0	1500.86	14
FALSE	High	Selected	DPIFFSHHANVDR	[R].DPIFFSHHANVDR.[M]					0.0696445	0.000962316	0.232	1	3	1	A0A0B2SP68	A0A0R0GYN5; A0A0B2SP68; A0A142FJE7	A0A0B2SP68 [383-395]	0	1554.74	13
FALSE	High	Rejected	SVGGDTHLGGEDFDNR	[K].SVGGDTHLGGEDFDNR.[V]					0.00145498	0	0.861	0	1	3		731313035		0	1675.73	16
FALSE	High	Unambiguous	RTQEQAASLGIPLSVLDDHPR	[K].RTQEQAASLGIPLSVLDDHPR.[I]					0.00199102	0	0.81	1	1	8	731328476	731328476	731328476 [116-136]	1	2303.21	21
FALSE	High	Unambiguous	FMVDPVPAHEHYIEGVAVR	[K].FMVDPVPAHEHYIEGVAVR.[D]					0.0365121	0	0.337	1	1	1	731319984	731319984	731319984 [36-54]	0	2166.08	19
FALSE	High	Unambiguous	RQMMLAQILSSEAR	[R].RQMMLAQILSSEAR.[E]					0.000475053	0	1.043	1	39	2	I1PXM1	A0A0J8B7X8; I1PXM1; Q6ITC5; Q7XJ37; A0A0K9S2G8; A0A0D3GAF1; T1LRV2; K3ZAR3; I1HGW1; A0A0E0HHQ3; M0VX98; A0A1D6MBN3; N1R1T7; A0A0E0HHQ1; A0A0E0DUE7; J3M9D7; F2DF61; A0A0E0PQS5; B6SJN6; A0A0A9CMU4; A0A0D9V113; A0A287GDK1; A0A0E0HHQ2; A0A0E0A2C8; A0A287GDN2; A0A287GDK2; A0A0E0L5A9; A0A0D9WJB9; I1HGV9; A0A1D5SSX4; A0A0D3GAF2; I1HGW0; A0A1D6FJH2; A0A0A9EC72; A0A0E0DUE8; W5AHK7; B4FN06; C5YUX9; B8AWA0	I1PXM1 [45-58]	1	1633.85	14
FALSE	High	Unambiguous	HTSFASLPGMWER	[K].HTSFASLPGMWER.[T]					0.00459542	0	0.674	1	23	1	A0A0J8E360	A0A1D6N631; A0A0J8E360; A0A1D6FPP1; A0A1D1YKH8; A0A1B6Q798; A0A2H3Z7M3; K3Z6L1; A0A1D6N634; A0A2H3XGG7; B8LQP6; B6TK79; A0A1E5VVA3; C5YYD7; A0A2H3Z6W7; M0T1T0; C0HGZ1; A0A0K9R3G1; A0A1D1Z801; B6TDJ2; B4FY87; A0A2I0WNS6; B4G195; Q5F4K8	A0A0J8E360 [284-296]	0	1518.72	13
FALSE	High	Unambiguous	SAQDIANVELAPTHPIR	[K].SAQDIANVELAPTHPIR.[L]					0.203064	0.00685958	0.058	1	1	1	Q75ZE5	Q75ZE5	Q75ZE5 [156-172]	0	1831.97	17
FALSE	High	Unambiguous	LILDTIRGDQQHFVR	[R].LILDTIRGDQQHFVR.[R-]					0.117468	0.00257247	0.147	1	204	2	731313530	A0A1D6B7M9; Q2L9V8; A0A0E0GIK3; A0A0D9YUJ3; Q9LRI9; A0A251SB79; W1PZ45; V4TIZ5; A0A2P2MVR8; M7ZRJ8; K3Y6P7; A0A2P5SR76; A0A287IPL2; A0A0E0K208; A0A1S2XMT6; A0A1D6HCE8; A0A0V0IJY0; K4BDH9; K3YS30; G7KS28; A0A1U8I8X7; A0A0D6R4N7; I1P1X2; A0A1S3TH45; A0A1U7ZDJ8; Q9XJ53; A0A0L9U6V1; A0A0S3RVF6; A0A0D2SRP5; A0A2C9U6Q2; A0A2G5C309; A0A287IPN7; A0A1B6PLP8; A0A2G2XI79; A0A218WF84; A0A2N9FFD5; A0A251S785;…	731313530 [446-460]	1	1810.99	15
FALSE	High	Unambiguous	QPLINRPPPATGVPVAGAIDQRPSR	[K].QPLINRPPPATGVPVAGAIDQRPSR.[N]					0.0547923	0.00054243	0.271	1	1	1	731332610	731332610	731332610 [208-232]	0	2607.45	25
FALSE	High	Unambiguous	IDFAPYGLNPPHTHPR	[R].IDFAPYGLNPPHTHPR.[GAS]					0.00270784	0	0.76	1	84	26	A0A068V823	M1B046; A0A2G9GIJ2; A0A2G9G5C7; A0A2N9FGP7; A0A0K9R3P7; A0A1Q3BNZ7; A0A2P4LLL3; 731355754; A0A1Q3BP42; A0A2G9GLH4; A0A199V854; A0A1Q3BNZ9; A0A068VNQ5; B9I5S8; A0A2K1Y199; A0A068USY2; A0A199UES2; K4B1L5; A0A2P4HBT7; A0A068UR45; A0A1Q3BPF8; A0A068V823; A0A218WHF6; K4B1L7; A0A2I0I3Z4; A0A2P4LLK0; A0A2G9G5C4; A0A1Q3BPC8; A0A2N9F3P4; A0A1U8A7F9; A0A2I4GLS7; A0A2N9FB72; A0A199V323; A0A199UGR6; A0A2N9F3…	A0A068V823 [99-114]	0	1831.92	16
FALSE	High	Rejected	QLIELELSNNNLSGPISR	[KR].QLIELELSNNNLSGPISR.[E]					0.204317	0.00685958	0.057	0	2	1		A0A059BSG6; A0A059BSV5		0	1997.07	18
FALSE	High	Selected	QLIELELSNNNLSGSIPR	[R].QLIELELSNNNLSGSIPR.[E]					0.0458418	0	0.3	1	3	1	A0A059CQ51	A0A059CQK9; A0A059CQ51; A0A059BS13	A0A059CQ51 [438-455]	0	1997.07	18
FALSE	High	Unambiguous	AHGGFSVFAGVGER	[K].AHGGFSVFAGVGER.[T]					0.0749788	0.000962316	0.22	3	251	1	A0A2P4LXF3; 731341013; A0A175YRR8	A0A287GJ54; A0A0A0KTA5; F2D5B2; D7M1G9; W5DDM7; A0A0D2VYM2; A0A1J7HJE4; A0A061E5Q6; A0A0A0KPJ2; A0A2H3XR79; A9NUR7; A0A1U8FHC9; A0A0K9NYL5; A0A1D5VBW3; A0A2P4LXF3; A0A0D2S1Z3; A0A059BEJ4; A0A2I0KLL8; A0A287LBT9; A0A2I0XEZ3; A0A1U8EIM6; A0A1E5WI54; A0A0D2V4L6; A0A0D2VYM6; A0A0V0IJL8; A0A1J6K2R3; A0A2J6LIR9; B8A7M8; A0A0E0L5G3; A0A1U8FNM3; P19023; A0A2G5F6M9; A0ZW41; A0A0D3EGT2; A0A0S3SM21; A0A1U8F…	A0A2P4LXF3 [249-262]; [475-488]; 731341013 [248-261]; A0A175YRR8 [114-127]	0	1390.69	14
FALSE	High	Unambiguous	RPSSSSAVAGGLPPLVR	[R].RPSSSSAVAGGLPPLVR.[S]					0.0114189	0	0.526	1	1	1	731362829	731362829	731362829 [173-189]	0	1650.93	17
FALSE	High	Unambiguous	VTERELEDEFR	[RK].VTERELEDEFR.[VRAITSML]					0.0970775	0.00187066	0.178	1	57	3	M4CUE5	A0A0D3C1U0; A0A1J3GLI7; A0A067KEM8; R0H1W9; A0A1S4DRS7; M1CHP4; K4CID1; A0A0K9R6R6; R0I8A8; A0A0V0ID65; D7T0J3; V4MFL5; A0A1J3EHL9; A0A1S4BLQ2; S8CY70; A0A068UXU1; V4KWI4; A0A0M9UMS4; M4ETF1; M4CUE5; A0A178V2N6; A0A078FKG5; D7MB51; A0A1U7ZSS5; M4E5E0; D7KNJ8; V4L7V8; A0A1U8BL96; A0A078J4S6; A0A2K3LJ36; Q9SJA6; A0A2G9FXD5; A0A0D3DVL6; S8DKN5; R0FYU6; A0A2N9GPZ1; M4E769; A0A0D3CCT8; A0A2R6R4R6; A0A…	M4CUE5 [643-653]	1	1422.69	11
FALSE	High	Unambiguous	TDLEVDGLVTPHAHPR	[R].TDLEVDGLVTPHAHPR.[A]					0.0217809	0	0.421	1	2	1	731347688	731347688; A0A0J8BVG7	731347688 [127-142]	0	1756.9	16
FALSE	High	Unambiguous	ITLSGHDEYIVR	[K].ITLSGHDEYIVR.[G]					0.0390676	0	0.326	1	1	3	731356825	731356825	731356825 [94-105]	0	1402.73	12
FALSE	High	Unambiguous	LEGEVEIR	[K].LEGEVEIR.[EA]					0.168851	0.00563879	0.088	1	6	6	731319149	1108969917; A0A0K9RJW4; 731319149; 1108969923; 731353748; 731353739	731319149 [8-15]	0	944.505	8
FALSE	High	Unambiguous	SDMDVGGVVPIHTHR	[R].SDMDVGGVVPIHTHR.[V]					0.00915107	0	0.562	1	2	1	731323187	731323187; 1108892423	731323187 [93-107]	0	1619.8	15
FALSE	High	Unambiguous	SRGGFSFGGIGGGGSGAATGR	[R].SRGGFSFGGIGGGGSGAATGR.[S]					0.00245407	0	0.776	1	2	1	Q20CD6	731320170; Q20CD6	Q20CD6 [107-127]	1	1812.87	21
FALSE	High	Rejected	ATSVFIPHGPGAVR	[K].ATSVFIPHGPGAVR.[D]					0.215945	0.00825917	0.048	0	1	1		A0A199UKX2		0	1408.77	14
FALSE	High	Unambiguous	VAAHWYTVNYR	[K].VAAHWYTVNYR.[E]					0.186312	0.00627731	0.072	1	81	1	A0A176VTR6	A0A1Y1IJP5; A0A072UDQ2; M4ESN1; A0A0D3DDY1; A0A0D6R8R6; A0A1D6CXK2; A0A077RXZ5; A0A176VTR6; A0A176WK22; A0A199UU56; M4D8Q5; A0A287VKI9; A0A287VKJ9; A0A078IXV3; A0A1D6BX05; A0A2H3YQY4; A0A087GWV7; U5D7E5; D8S0B9; A0A0E0HKM3; A0A287GIG5; A0A1D6C193; K7W6W9; A0A1D5X3U7; 731360648; M0RQ25; K3XXP1; A0A287VKJ2; A3B875; A0A2R6WW47; M4FCR9; A0A1D6CYJ1; A0A1E5WF61; M4F6X3; Q9M7I6; B7FJR0; A0A0D3GCI9; A0A2…	A0A176VTR6 [263-273]	0	1379.69	11
FALSE	High	Unambiguous	LRVNTISAGPLR	[KR].LRVNTISAGPLR.[S]					0.0496575	0	0.287	1	72	12	V7AFP4	A0A2I4F0U9; A0A2K2BAG2; A0A2P5RMU6; E6Y9A9; A0A0S3RMF4; D8KXZ7; A0A1S3BM63; A0A2P5XQ26; A0A166GSX4; B7FFN2; A0A218XD55; A0A0L9V014; 731325484; A0A1R3GY91; A0A2C9VDF4; A0A164X718; A0A022S0L2; A0A1Q3C705; W9RIH0; V7ADM7; A0A067KRX9; E9NVZ3; K7LSQ5; I1LPJ8; I6XNJ0; A0A0S3SE19; C6TKG3; V7AFP4; A0A218W9R7; M4QSR4; I1LIT1; A0A2I0JD82; A0A2R6R566; G7JNJ7; A0A2K1XAQ9; A0A2P5E647; A0A1S3U9C4; D8KXZ6; A0A0…	V7AFP4 [387-398]	1	1296.77	12
FALSE	High	Selected	DPIFYAHHANIDR	[RK].DPIFYAHHANIDR.[ML]					0.126465	0.00257247	0.135	1	19	2	731350566	A0A0E0JPQ4; B3WFP2; A0A0D3EUY4; A0A0K9RFC8; A0A2J6LEP1; G4U402; B8AAI5; 731350566; A0A0D9YG01; A0A0E0N3H7; A0A0D2TW57; I1NSB9; B8YHZ9; A0A2P5WVT9; A0A0E0C8Q0; A0A2J6KEG8; A0A0E0FUB3; A0A2P5SUI6; A0A168	731350566 [364-376]	0	1568.76	13
FALSE	High	Rejected	DPIFYAHHAQVDR	[R].DPIFYAHHAQVDR.[T]					0.126465	0.00257247	0.135	0	1	1		A0A0K9QIF9		0	1568.76	13
FALSE	High	Unambiguous	QHQFQQFEAIQR	[R].QHQFQQFEAIQR.[S]					0.156839	0.00409645	0.1	1	1	2	731373104	731373104	731373104 [215-226]	0	1559.77	12
FALSE	High	Unambiguous	TMGWDQYPHGR	[R].TMGWDQYPHGR.[W]					0.0309258	0	0.364	1	1	3	731323657	731323657	731323657 [343-353]	0	1347.59	11
FALSE	High	Unambiguous	LTRPAYMALR	[R].LTRPAYMALR.[D]					0.196915	0.00652397	0.063	1	2	1	731311266	731311266; A0A2C9VSK7	731311266 [372-381]	0	1191.67	10
FALSE	High	Unambiguous	QAVDISPLRR	[R].QAVDISPLRR.[VIL]					0.0797348	0.000962316	0.21	1	253	6	I0YZL1	A0A1S2Z921; A0A166AA18; O24111; A0A200PTV5; I0YZL1; A0A2G2Y0X0; A0A1U8HTP1; A0A2H5MXV6; A0A2P2LDL4; B9T7U3; A0A0D2RIP6; A0A0U1VMQ5; C1E560; K3XM55; A0A1Q3D1E8; C1N2W4; V7BV97; A0A1S3BGS8; W1NVE5; K8ER96; A0A2H3X4I4; A0A2J6MIQ5; A0A1U8IME2; A0A0K9RM59; A0A1J7G599; F2CT61; M0T1K9; A0A1J3JQ78; M8BL41; F6HLE8; M0TNT8; A0A1J6KBH0; H2KWI0; A0A0E0F5Q9; A0A0K9P735; A0A0L9ULY6; A0A1Q3D0W5; A0A2P4H167; A0A…	I0YZL1 [129-138]	1	1154.66	10
FALSE	High	Unambiguous	ATAGDTHLGGEDFDNR	[K].ATAGDTHLGGEDFDNR.[MLIK]					0.000492911	0	1.037	1	255	20	731318762	A0A1D5YRV8; A0A1D5S806; A0A199W1V6; A0A1D5U1Y0; A0A1J6IP41; A0A2G9GGW8; A0A1U8AZG4; Q9C7X7; A0A1D5VA43; A0A1U8IVE8; C5YZA1; A0A096P8N6; V4M1U9; A0A1U8PHA9; A0A140CZC8; A0A1J6J259; P27322; E2D555; A0A067KRI1; A0A1D5ZF15; A0A2G2WVY2; A0A0D3CAN6; A0A0C9S525; I1R2A1; A0A2I4EV32; A0A2G3BK04; A0A1D5ZF14; A0A2H9ZSG8; A0A0C9RYG3; I1PWC2; A0A172C1A5; C5WPF7; A0A2R6PF91; A0A0F7CS07; A0A2G2ZDX8; X4Z319; A0A…	731318762 [227-242]; [1102-1117]	0	1675.73	16
FALSE	High	Unambiguous	SGGQVRDEYRTDYDPGR	[RK].SGGQVRDEYRTDYDPGR.[G]					0.113212	0.00257247	0.153	1	80	1	731314786	A0A072VCJ4; A0A059A0J2; A0A1U8A279; I1IBI1; C0L7C6; B6SNB6; C0PIA2; V4TJ42; C5XXC1; V7BXM9; A0A067JMM7; A0A1S4AU92; F2CV80; A0A022Q6B4; U5FMG8; D5FM17; Q84L14; A0A2K1J3H7; B8YFW4; A0A1U8JPL9; A0A0D2SKG7; A0A1S3CLT9; I1LUI7; B1P764; A0A1D6APT5; A0A1S3TD67; A0A218XEB3; A0A1U7V9C4; A0A223HBL6; B6TL33; A0A2C9UTR8; A0A061E3G7; A0A1Y1IFF6; A0A1L6K4J4; A0A2H3Z960; A0A1D6HCX8; A0A287U9L3; A0A2G5CV42; A0A…	731314786 [124-140]	2	1970.9	17
FALSE	High	Unambiguous	LDFGVGGVIPIHSHR	[R].LDFGVGGVIPIHSHR.[T]					0.00187226	0	0.82	1	10	28	A0A0K9RDC3	A0A0K9RFV5; A0A0K9RHE0; 731320515; 731320509; A0A0K9RYK6; A0A0K9RDC3; 731320505; A0A0K9RFJ5; Q9FPQ0; Q9FPP9	A0A0K9RDC3 [91-105]	0	1603.87	15
FALSE	High	Unambiguous	NRPPSADSSAGPPQVAPPQVNDKPVLGAPPAAAR	[R].NRPPSADSSAGPPQVAPPQVNDKPVLGAPPAAAR.[W]					0.101973	0.00224036	0.17	1	1	1	A0A0K9S448	A0A0K9S448	A0A0K9S448 [36-69]	0	3329.73	34
FALSE	High	Unambiguous	RGNLPGAENLVVQR	[K].RGNLPGAENLVVQR.[F]					0.000630386	0	0.997	1	164	1	A0A2P5XEH8	W9R8L7; R0I9D4; A0A103YIZ5; A0A103Y974; A0A1U8F1I0; K4C5S4; A0A1U7X2B5; A0A0D2TT68; M4F1B8; A0A1U8GX72; M5X3K6; A0A0K9RWL2; A0A1U8PDD8; A0A061FM55; A0A068VJF8; A0A078HHP7; A0A251SCP5; A0A0K9RWJ9; A0A078F689; A0A2J6KJF1; V4V9V7; A0A175YJU5; V4LL98; A0A0D3CL97; A0A068V0E9; A0A1J6IH03; A0A0C9SAL9; A0A1R3K5T5; A0A0D2UFQ4; M0SYF3; A0A2K2C4W2; A0A1J3DMH7; A0A1R3FW30; A0A2I0WVF5; A0A1D1YPG5; A0A2P2MW97;…	A0A2P5XEH8 [378-391]	1	1522.84	14
FALSE	High	Unambiguous	LNWASLGAGQRR	[R].LNWASLGAGQRR.[Q]					0.196915	0.00652397	0.063	1	1	1	731329625	731329625	731329625 [166-177]	1	1328.72	12
FALSE	High	Unambiguous	HITIFSPEGR	[R].HITIFSPEGR.[L]					0.0354064	0	0.342	1	177	2	A0A0J8B475	A0A0D2SIG5; A0A2K1KCM2; A0A1J3G3A3; A0A1Y1HJU3; I3T2Q9; A0A1J3DYI2; Q9FER4; C0LSI3; S8DTP5; A0A0K9R8Z8; A0A0B0MQP3; A0A2G5DHZ6; M0RJ25; A0A078FU71; I3T1I8; G7IJ13; C1MTW8; A0A2G5D7R8; A0A067KQ25; A9P9I1; D2D307; I3T518; A0A2R6QUM0; A0A287PQS8; A0A2P6RYT5; A0A2G5DHX7; A0A0D2UB57; A0A1U8B1I4; B6TQJ6; A0A103YB51; A8IRE2; A0A2R6PT30; B7FMD3; C5WVT0; O48551; A9TFP4; A0A2I4FTS6; V4SS21; I0YZR6; A0A151T…	A0A0J8B475 [12-21]	0	1156.61	10
FALSE	High	Unambiguous	HLVQQYLESTR	[RK].HLVQQYLESTR.[G]					0.0146037	0	0.486	1	4	3	A0A200QFY2	M5WB94; A0A200QFY2; 731333949; A0A0K9QBQ6	A0A200QFY2 [139-149]	0	1373.72	11
FALSE	High	Unambiguous	SSLREDFTEGVR	[R].SSLREDFTEGVR.[AV]					0.0918502	0.00187066	0.187	1	5	2	731353609	731353609; 731353611; A0A0K9QLI7; A0A0K9QNH6; 731341614	731353609 [370-381]	1	1395.69	12
FALSE	High	Unambiguous	QYFLGTDSAPHER	[K].QYFLGTDSAPHER.[RQ]					0.00545898	0	0.646	1	3	2	A0A0J8FG47	A0A0J8FG47; A0A0K9QV58; 731325162	A0A0J8FG47 [242-254]	0	1520.71	13
FALSE	High	Unambiguous	YIYGGHVAGYMR	[K].YIYGGHVAGYMR.[T]					0.0212516	0	0.425	1	2	1	731354118	731354118; A0A0K9QSE1	731354118 [197-208]	0	1386.66	12
FALSE	High	Unambiguous	RTTLVANTSNMPVAAR	[KR].RTTLVANTSNMPVAAR.[E]					0.000133821	0	1.249	2	243	2	Q39442; A0A1E5VBA7	A0A067DVI5; O04054; A0A151SGF9; A0A1D6CRA6; C0PHC0; Q38676; A0A1D6SC42; E1ZT42; A9RGW5; R0GDS5; B3SGC7; A0A2H3XCP3; I0YKZ3; A0A0A7LU40; A0A0E0Q163; A0A022PZI2; A0A061G8X4; A0A1Y1I8P3; A0A2P5W5A3; Q39291; M1CTC4; W9S238; A0A061RM85; A0A0V0IQG7; A0A287XSJ3; A0A0P0AE40; A0A1J7IEI4; M8A7G5; M0RYR1; A0A2P6VKQ0; A0A2R6XJY8; A0A061QJE9; C1MIH4; A0A1J3DEQ8; A0A166EQ15; M4CHF0; A5BYV7; A0A1Y5I544; Q9MB47;…	Q39442 [311-326]; A0A1E5VBA7 [257-272]	1	1701.91	16
FALSE	High	Unambiguous	NFGMPTPHGYR	[R-].NFGMPTPHGYR.[K]					0.218617	0.00825917	0.046	1	154	1	731344518	A0A162A364; A0A068UDE6; A0A2I4G2R7; A0A251K5C1; A0A2P5R056; A0A067JWV8; M5W775; A0A0D3B5I8; A0A022QFK3; A0A0D2NND3; A0A0D2Q6Q5; A0A1J3DH43; A0A0K9PLG3; A0A200R4S0; A0A0D2V474; A0A2P5EX85; A8RWV6; V4SZ50; A0A286SC09; A0A0S3RUT1; F2WMV2; A0A059D6G6; M4CLQ4; Q9LLR0; A0A2P5R055; A0A2R6RX78; A0A072U0F2; A0A0R0F1N7; A0A2P5YS65; A0A1J7H3R8; A0A1U8IPQ9; A0A200QUG8; A0A1U8NIY7; A0A0B0MUG3; A0A067DT23; A0A…	731344518 [211-221]	0	1276.59	11
FALSE	High	Unambiguous	IHGSPFSTATLR	[K].IHGSPFSTATLR.[A]					0.00698152	0	0.606	1	1	33	A0A0J8E0F9	A0A0J8E0F9	A0A0J8E0F9 [5-16]	0	1286.69	12
FALSE	High	Unambiguous	IFHLNPSGR	[-].IFHLNPSGR.[F]					0.106459	0.00224036	0.163	1	1	1	A0A172MJZ6	A0A172MJZ6	A0A172MJZ6 [1-9]	0	1040.56	9
FALSE	High	Unambiguous	IQGVHSVNIIR	[R].IQGVHSVNIIR.[D]					0.0700742	0.000962316	0.231	1	1	1	M0TR95	M0TR95	M0TR95 [205-215]	0	1235.72	11
FALSE	High	Unambiguous	TVMRPPQVLR	[R].TVMRPPQVLR.[E]					0.116032	0.00257247	0.149	1	196	3	A0A200R3M8	A0A067LDY4; A0A200QTB6; A0A1B6QGC5; A0A1S2XKH6; A0A0K9P7J2; A0A2J6KLR6; A0A1R3GQF4; A0A2G9HTG8; A0A166JGE4; A0A151U170; H9BNZ8; A0A2P4LQ93; A0A1U8QBF2; J3LNH5; B7FK94; A0A1B6QG99; A9NNG0; A0A1J3JZS3; I1H5T0; U7DZ45; A0A2P5RIC9; A0A1U8AHF8; A0A218XQH7; A0A1U8MY99; K4CAB5; A0A2P5BLP5; C6TP03; A0A2C9WIG6; W9QYM9; A0A059ARE2; V7B8W2; K3ZW32; M8AER1; A0A2K1R445; A0A251ISP3; A0A0D2TRZ0; M0TXJ4; A0A103Y…	A0A200R3M8 [481-490]	0	1196.69	10
FALSE	High	Unambiguous	RQAVDLSPLR	[R].RQAVDLSPLR.[R]					0.145681	0.00292848	0.112	1	253	2	I0YZL1	A0A1S2Z921; A0A166AA18; O24111; A0A200PTV5; I0YZL1; A0A2G2Y0X0; A0A1U8HTP1; A0A2H5MXV6; A0A2P2LDL4; B9T7U3; A0A0D2RIP6; A0A0U1VMQ5; C1E560; K3XM55; A0A1Q3D1E8; C1N2W4; V7BV97; A0A1S3BGS8; W1NVE5; K8ER96; A0A2H3X4I4; A0A2J6MIQ5; A0A1U8IME2; A0A0K9RM59; A0A1J7G599; F2CT61; M0T1K9; A0A1J3JQ78; M8BL41; F6HLE8; M0TNT8; A0A1J6KBH0; H2KWI0; A0A0E0F5Q9; A0A0K9P735; A0A0L9ULY6; A0A1Q3D0W5; A0A2P4H167; A0A…	I0YZL1 [128-137]	1	1154.66	10
FALSE	High	Unambiguous	TPWNTSEDDHEIR	[R].TPWNTSEDDHEIR.[M]					0.00881954	0	0.568	1	1	6	731327229	731327229	731327229 [86-98]	0	1599.7	13
FALSE	High	Unambiguous	HGVAAVSPTEFR	[K].HGVAAVSPTEFR.[V]					0.00871172	0	0.57	1	1	1	731330508	731330508	731330508 [52-63]	0	1270.65	12
FALSE	High	Unambiguous	QTLETARNPELMR	[R].QTLETARNPELMR.[E]					0.0822248	0.000962316	0.205	1	14	2	731357482	A0A0D2SNI3; A0A1S3BKE7; A0A0D2NIB1; A0A251RMV7; A0A0A0L1J6; A0A0D2RLH5; A0A0D2RTC4; A0A2P5YLG3; A0A2P5RRC5; A0A1S3BKN3; 731357482; A0A0D2PZN0; A0A0K9RF84; A0A1U8MRQ0	731357482 [225-237]	1	1558.8	13
FALSE	High	Unambiguous	ISVGTPDEARHPDTLR	[R].ISVGTPDEARHPDTLR.[S]					0.0246318	0	0.401	1	1	4	731368735	731368735	731368735 [6-21]	1	1763.9	16
FALSE	High	Unambiguous	VVDSMTNNLRPTR	[R].VVDSMTNNLRPTR.[A]					0.00352755	0	0.717	1	11	4	1108951830	A0A1S2XXR3; A0A0K9RXP2; A0A1S3CH64; A0A0K9PKG2; A0A1S4E645; 731345443; 1108951830; A0A0K9QLS8; A0A1S3CH76; A0A0A0KKD4; A0A0A0KIJ5	1108951830 [315-327]	0	1502.77	13
FALSE	High	Unambiguous	VASQPASNATRPTTVPXR	[R].VASQPASNATRPTTVPXR.[X]					0.00672859	0	0.612	1	3	6	A0A0J8DX81	A0A0K9R3P0; A0A0J8DX81; Q0MX58	A0A0J8DX81	0	1866.02	18
FALSE	High	Unambiguous	NHELPNLNSGNPR	[R].NHELPNLNSGNPR.[K]					0.0675355	0.000962316	0.237	1	1	1	731328062	731328062	731328062 [371-383]	0	1461.72	13
FALSE	High	Unambiguous	VSEPELERETGER	[K].VSEPELERETGER.[R]					0.0544564	0.00054243	0.272	1	1	5	731358644	731358644	731358644 [25-37]	1	1530.74	13
FALSE	High	Unambiguous	HFQADTIPR	[R].HFQADTIPR.[I]					0.0929869	0.00187066	0.185	1	8	2	A0A1J7I1J0	A0A2P6R0G7; 731343246; A0A0K9S0P3; A0A2P5BPA8; A0A1J7I1J0; A0A2P5EBD7; A0A2I4FYI8; A0A175YJI4	A0A1J7I1J0 [272-280]	0	1084.55	9
FALSE	High	Unambiguous	NMGLRPGATASMR	[R].NMGLRPGATASMR.[N]					0.0777972	0.000962316	0.214	1	1	2	731352582	731352582	731352582 [455-467]	0	1361.68	13
FALSE	High	Selected	YGISRQDQDQAAVESHR	[R].YGISRQDQDQAAVESHR.[R]					0.0768462	0.000962316	0.216	1	1	2	C0PQ57	C0PQ57	C0PQ57 [207-223]	1	1959.93	17
FALSE	High	Selected	YGVTRQDQDQAAVESHR	[R].YGVTRQDQDQAAVESHR.[R]					0.0759067	0.000962316	0.218	1	1	2	A0A0C9SAY4	A0A0C9SAY4	A0A0C9SAY4 [207-223]	1	1959.93	17
FALSE	High	Unambiguous	RVQESLAIENR	[R].RVQESLAIENR.[H]					0.0282005	0	0.379	1	3	1	K4Q1D5	K4Q1D5; 731321090; A0A0K9QCX4	K4Q1D5 [50-60]	1	1314.71	11
FALSE	High	Unambiguous	VQAVAVSPDRFESR	[R].VQAVAVSPDRFESR.[KR]					0.123392	0.00257247	0.139	1	11	4	731315011	A0A2I4HUX7; V4SX36; V4TGK1; V4VIL6; A0A0A0KMA5; A0A067GDK3; A0A151UBP9; A0A1S3ATP0; A0A067GN28; 731315011; A0A068UVB4	731315011 [322-335]	1	1560.81	14
FALSE	High	Unambiguous	YSLPQGDIHHVINPDPYR	[K].YSLPQGDIHHVINPDPYR.[G]					0.0130734	0	0.504	1	2	4	731326779	A0A0K9QF86; 731326779	731326779 [209-226]	0	2121.05	18
FALSE	High	Unambiguous	IQGVHSINIIR	[KR].IQGVHSINIIR.[D]					0.0423194	0	0.313	1	3	2	A0A199W2U5	A0A199W2U5; A0A0K9RLA9; 731349322	A0A199W2U5 [207-217]	0	1249.74	11
FALSE	High	Unambiguous	ESTIHLVLR	[KRE].ESTIHLVLR.[LX]					0.0623462	0.00054243	0.25	1	271	20	A0A0K9NNZ5	J3MGS5; A0A1S4A0T0; E7FJ37; A0A287PAQ0; A0A0D3GR39; A0A287PB32; A6N0G0; A0A1D6C2D5; A0A2I0KLR7; A0A1U8LQC7; A0A1D5XN92; C5E7H1; A0A0A0YMC6; A0A2I4EA40; A0A1D5XZY8; A0A178VJQ5; C5YGJ5; B8BEN6; A0A0D3H884; A0A1D2A3N0; I1IQ69; A0A1D6BQT7; J3M468; F2EBL5; A0A1U8MGK8; A0A1U7YZI3; A0A2P5E6N3; A0A2P4L915; A0A1S2YJB5; A0A1U8ASY0; A0A1D6DJN2; B8AYV2; Q944F7; A0A0J8B8M5; Q8RUC6; A0A251SAY6; A0A0D3GX14; A0A…	A0A0K9NNZ5 [71-79]; [147-155]; [223-231]; [299-307]; [375-383]	0	1067.62	9
FALSE	High	Unambiguous	LDFGVGGVIPVHSHR	[R].LDFGVGGVIPVHSHR.[T]					0.00160543	0	0.845	1	12	19	731345483	731345483; 731356198; 731345499; 731320499; A0A0K9QQ38; 731345487; 731329148; 731345501; 731345458; 731345503; 731345497; 731345625	731345483 [91-105]	0	1589.85	15
FALSE	High	Unambiguous	RGAGPVQQTQQPLPMMQQQMLPR	[R].RGAGPVQQTQQPLPMMQQQMLPR.[A]					0.0233054	0	0.41	1	2	2	A0A2H5P9E1	A0A2H5P9E1; V4U5F4	A0A2H5P9E1 [510-532]	1	2620.33	23
FALSE	High	Unambiguous	TSAAPLVNASHDHEEEESEDEFAQLAHR	[R].TSAAPLVNASHDHEEEESEDEFAQLAHR.[S]					0.000767497	0	0.965	1	1	1	731313282	731313282	731313282 [278-305]	0	3119.39	28
FALSE	High	Unambiguous	GPHGDAGLTGR	[R].GPHGDAGLTGR.[K]					0.0885226	0.000962316	0.193	1	1	1	M8AW87	M8AW87	M8AW87 [244-254]	0	1037.51	11
FALSE	High	Unambiguous	IRLPSNVLSPPGR	[RK].IRLPSNVLSPPGR.[DEN]					0.0635071	0.000962316	0.247	1	31	1	A0A0D2Q167	A0A0D2Q167; V7B4B5; A0A1S2XSE8; A0A1Q3B1W1; A0A061F5G1; B9RM50; A0A2P5EU87; A0A1U8NWW5; A0A0L9U3P4; A0A0K9Q8P5; I3SNR1; I1N407; I3SCB8; A0A059AXR8; A0A1S3VXS4; A0A2P5CDP5; A0A0B0MFD2; G7KRL1; I3SY89; A0A151TAX9; A0A2I4FBG3; A0A0D2R169; 731326189; I3T143; A0A2G9HVT7; A0A2K3LQD4; A0A2P5YWR9; A0A067K3Q3; A0A1U8NWK7; A0A0D2Q892; A0A2C9UNN0	A0A0D2Q167 [140-152]	1	1405.83	13
FALSE	High	Unambiguous	NTSPDAGRYEERPVAAGTLNVAQLR	[R].NTSPDAGRYEERPVAAGTLNVAQLR.[H]					0.0390676	0	0.326	1	2	1	731373717	1108864229; 731373717	731373717 [110-134]	1	2685.37	25
FALSE	High	Unambiguous	VAETLMFDYHR	[R].VAETLMFDYHR.[Q-K]					0.0275152	0	0.383	1	251	1	731349068	A0A0D2TMJ8; A0A068TVT8; A0A287P890; A0A068UKM6; A0A1S3TWQ6; A0A0L9T6F2; A0A1J3DRW3; A0A2K1ZC85; F8V2Y4; A0A059A9A5; A0A0B0MPC5; A0A2H3ZD45; A0A2C9V126; M0TGD4; I1H6W7; A0A0D3C2P7; B6UIR3; J3LMI0; A0A2P6QIJ9; A0A1U8GVJ2; V7AGU9; A0A0K9Q1U4; B3VDY9; A0A1J6KI03; A0A2P5YS72; V4KWQ1; A0A161X0E5; A0A061H036; A0A2P4IQF2; A0A2P5C6H4; A0A2I0B264; A0A059A935; A0A0K9S2V0; A0A2P5Q217; A0A1U8MMM3; A0A251NLW6;…	731349068 [179-189]	0	1381.66	11
FALSE	High	Unambiguous	MGLNDRDIVVLSGSHSLGR	[R].MGLNDRDIVVLSGSHSLGR.[A]					0.000427894	0	1.06	1	2	8	731337647	1108929373; 731337647	731337647 [146-164]	1	2026.05	19
FALSE	High	Unambiguous	HNLPVQEFVVR	[K].HNLPVQEFVVR.[N]					0.118192	0.00257247	0.146	1	4	1	731327772	A0A2I4FKA7; A0A1S3CLI6; A0A0A0LRX0; 731327772	731327772 [409-419]	0	1337.73	11
FALSE	High	Rejected	AHGTAVGLPTDDDMGNSEVGHNALGAGR	[RK].AHGTAVGLPTDDDMGNSEVGHNALGAGR.[I]					3.29267e-05	0	1.477	0	7	1		A0A165YW16; A0A103YM68; A0A059A0A7; A0A103YLE3; A0A2G9HJH6; A0A059A2K2; A0A199V3A6		0	2719.25	28
FALSE	High	Selected	AHGTAVGLPSEDDMGNSEVGHNALGAGR	[RK].AHGTAVGLPSEDDMGNSEVGHNALGAGR.[I]					7.90472e-06	0	1.709	2	42	1	731310533; 731344436	A0A2I0A6I8; R0G3V4; A0A087HMC4; A0A1J3GYJ4; O04499; 731310533; A0A078G6S3; A0A0K9QXB6; A0A078HDW3; A0A1J3DT76; I1NSQ7; E4MW06; A0A0D9YGH7; Q93ZF2; A0A0D3CLV2; A0A2K2A0H1; D7KJU0; M4ELN2; A0A0K9RD63; D7L757; A0A0D9YGH8; A0A0E0N441; A2ZZ01; V4L0Q4; 731344436; A0A0E0FUY0; A0A0D3DNR9; A0A1J3G8B0; A0A0E0JQA3; A0A0E0FUX9; M4EPS8; A0A1J3K4P0; B9DFU6; B9IGY9; R0IC76; A0A1J3EX51; Q8H161; A0A078GN60; Q8LF5…	731310533 [65-92]; 731344436 [65-92]	0	2719.25	28
FALSE	High	Unambiguous	TGNVIADVAEGDAEDVNRAVSAAR	[R].TGNVIADVAEGDAEDVNRAVSAAR.[K]					0.000435862	0	1.057	1	2	3	731342795	731342795; 731342797	731342795 [78-101]	1	2400.17	24
FALSE	High	Unambiguous	IHPMTIISGYR	[K].IHPMTIISGYR.[MV]					0.0787601	0.000962316	0.212	1	46	1	731323478	A0A068V9E8; A0A1S4B696; A0A0D2S8X5; W1PN82; M5XYF8; A0A1U8JBY0; A0A0D6R793; 731323478; D9ZJD1; A0A2I4G354; A0A2G9GTM3; A0A1U8MGP5; A0A0C9S6V2; A0A218WEA4; A0A1Q3AMB3; A0A2I4DER4; A0A2G5E3A8; A0A061FE79; F6H0C8; A0A2G5E3H6; A0A2G2WNP9; A0A200QPP0; A0A059BVL3; A0A0B0P7Z9; A0A0D2TSH0; A0A2J6M6Q5; A0A2P6PZE9; A0A061FL42; A0A200QZW6; A0A1U8PEE1; A0A2N9FMC0; A0A2P5X2N4; A0A1U7X1T8; A0A2I4DY26; A0A0D2QI…	731323478 [116-126]	0	1287.69	11
FALSE	High	Unambiguous	MHNFSSIEDFR	[RK].MHNFSSIEDFR.[G]					0.0330904	0	0.353	1	18	1	731362839	B8YIB3; 731362839; V4TXE5; A0A067JLS0; A0A2K1Y8Q7; U5FPE1; A0A2C9VLK4; A0A1Q3CQC2; A0A067DY11; B9N381; A0A2R6QHF1; A0A0K9QC46; B9T6I2; F6GSP9; V4VNR3; A0A2I0KTQ7; A5AHG5; A0A1D1Y8B8	731362839 [361-371]	0	1382.62	11
FALSE	High	Unambiguous	HDQMEWWR	[K].HDQMEWWR.[SF]					0.152089	0.00373344	0.105	1	4	1	W9RP37	A0A0K9RC64; 731321642; W9RP37; Q84LL6	W9RP37 [227-234]	0	1187.51	8
FALSE	High	Unambiguous	NQSLTNLLAHGPR	[R].NQSLTNLLAHGPR.[D]					0.0890687	0.000962316	0.192	1	1	1	731342736	731342736	731342736 [171-183]	0	1420.77	13
FALSE	High	Unambiguous	MVNHFVQEFK	[R].MVNHFVQEFK.[R]					0.0238859	0	0.406	1	252	1	731318762	A0A0K9PAJ9; F6HLD8; A0A1D5S806; A0A1J6KP74; A0A199W1V6; A0A1D5U1Y0; A0A151S7R0; Q9C7X7; A0A1D5VA43; A0A1Y1IIH5; A0A1U8IVE8; C5YZA1; A0A1R3JR04; A0A1U8PHA9; A0A140CZC8; A0A1J6J259; P27322; A0A1D5ZF15; A0A2G2WVY2; A0A1D5XW58; I1R2A1; A0A2I4EV32; A0A2G3BK04; A0A1D5ZF14; A0A2H9ZSG8; A0A0C9RYG3; A0A1D6B2V4; I1PWC2; A0A0F7CS07; A0A2G2ZDX8; X4Z319; A0A1S2XU44; A0A1D6A2T9; O48563; A1Z3C6; A0A1D5XLU9; A0A…	731318762 [243-252]; [1118-1127]	0	1278.63	10
FALSE	High	Unambiguous	DAKVDKSHVHDVVLVGGSTR	[R].DAKVDKSHVHDVVLVGGSTR.[I]					0.167816	0.00563879	0.089	1	1	1	A0A068TQP9	A0A068TQP9	A0A068TQP9 [329-348]	2	2119.13	20
FALSE	High	Unambiguous	FLEHDLENVDR	[K].FLEHDLENVDR.[K]					0.013399	0	0.5	1	1	3	731339219	731339219	731339219 [423-433]	0	1386.66	11
FALSE	High	Unambiguous	IAPGVGANLIGQHSAER	[R].IAPGVGANLIGQHSAER.[N]					0.000744256	0	0.97	1	95	6	A0A067L5D1	A0A1D6KU43; A0A1D6GPV8; A0A1U8FBP6; A0A0E0QZY7; C4J3D1; A0A1U8IK89; A0A0E0M8B8; A0A1U8IUK4; A0A078JQD6; W9R928; A0A2H5NRF6; M1AHQ7; A0A2P2L6L3; 731339387; W5A7N8; A0A067L5D1; A0A2R6R5V0; A0A2P5YC44; A0A067KUM8; D7L079; A0A1D5SEI8; A0A1E5VUS0; B9G629; A0A2I0V7M6; A0A1S2YEK3; A0A2I4FCM6; B4FAZ3; A0A0K9RXC8; A0A087HDN0; G7J8S0; A0A2K3NIF5; A0A103XDA8; A0A251UU17; B8BH92; A0A2I0AEK1; A0A1U8Q615; Q94C…	A0A067L5D1 [63-79]	0	1689.9	17
FALSE	High	Unambiguous	RGGFVSNLPGDVPR	[KR].RGGFVSNLPGDVPR.[V]					0.182906	0.00627731	0.075	1	19	2	731355287	A0A1J7GZU5; A0A078IKR8; V4P4K0; A0A078GZ79; 731355287; M4EBV0; I1LS61; A0A0S3SB87; R0F6K8; V7AHR5; A5C319; A0A1R3GXC7; A0A2P5AE69; A0A2P5DNH9; A0A1R3KS73; A0A0D3DGK9; M4E601; A0A1S3TFF9; A0A0L9V6A1	731355287 [178-191]	1	1470.78	14
FALSE	High	Unambiguous	IDYGPNGGLNPPHTHPR	[R].IDYGPNGGLNPPHTHPR.[A]					0.0347591	0	0.345	1	2	1	A0A1U8PBD0	A0A1U8PBD0; A0A2P5S0K3	A0A1U8PBD0 [100-116]	0	1841.9	17
FALSE	High	Unambiguous	DSEIAMGAYQPHHLVTR	[R].DSEIAMGAYQPHHLVTR.[N]					0.0151527	0	0.48	1	2	1	731359185	A0A0K9RKF6; 731359185	731359185 [687-703]	0	1924.93	17
FALSE	High	Rejected	YSNSSIEIHTFNQSQYPR	[K].YSNSSIEIHTFNQSQYPR.[V]					0.0320883	0	0.358	0	3	1		I1HWE6; I1HWE5; A0A0Q3HXB2		0	2171.02	18
FALSE	High	Unambiguous	IDFAPWGVNPPHTHPR	[R].IDFAPWGVNPPHTHPR.[A]					0.0782772	0.000962316	0.213	1	1	3	A0A1E5W0Z0	A0A1E5W0Z0	A0A1E5W0Z0 [104-119]	0	1840.92	16
FALSE	High	Unambiguous	IVREVEAVGGNVTASASR	[R].IVREVEAVGGNVTASASR.[E]					1.59358e-05	0	1.595	1	2	3	731354052	731354054; 731354052	731354052 [139-156]	1	1814.97	18
FALSE	High	Unambiguous	TAHQLAMEIIR	[K].TAHQLAMEIIR.[N]					0.0822248	0.000962316	0.205	1	3	1	731325703	731325703; A0A0N6W2Q4; A0A2C9UJC7	731325703 [666-676]	0	1282.69	11
FALSE	High	Unambiguous	FVLTHLDGR	[R].FVLTHLDGR.[Q]					0.155877	0.00409645	0.101	1	6	4	A0A2I0X6K3	P43644; A0A2I0VGE3; 731348387; A0A249Y727; A0A0K9REY5; A0A2I0X6K3	A0A2I0X6K3 [363-371]	0	1057.58	9
FALSE	High	Unambiguous	IYGPDIPMLR	[K].IYGPDIPMLR.[L]					0.0565034	0.00054243	0.266	1	1	3	731340740	731340740	731340740 [88-97]	0	1174.63	10
FALSE	High	Unambiguous	IISVDNTPDDPRQR	[K].IISVDNTPDDPRQR.[K]					0.019984	0	0.435	1	1	4	731349068	731349068	731349068 [290-303]	1	1625.82	14
FALSE	High	Unambiguous	AFVHWYVGEGMEEGEFSEAR	[R].AFVHWYVGEGMEEGEFSEAR.[E]					0.0175628	0	0.456	3	255	1	A0A0D5MER0; A0A067L0Y2; A0A2G2V8B9	P14640; A0A1D5SQY7; A0A251V7F1; A0A0D2PSZ0; B9SHE7; A0A059T4Y0; A6MZU0; A0A1S3BZT0; A0A0K9RUV8; A0A1D5SQY5; A0A1D5SH31; A0A0D2T2R1; A0A0D2TBH6; R0FBY0; A0A1D2A0Y0; 731339295; A0A2G3D9Q8; Q70ZL4; P14641; A0A2H5PZQ2; A0A2I4HD86; A0A1P8FAN9; A0A2G2Y9E2; A0A2R6RKU7; A0A1J6JNW3; A4K4Y7; A0A0S3T5B1; J3LSD9; P33629; A0A0A0KIM4; A0A2G9GQS8; A0A060ID32; A6YIK6; A0A0D5MER0; B2BGT6; A0A1J6KAT7; A0A0D3B200; …	A0A0D5MER0 [404-423]; A0A067L0Y2 [403-422]; A0A2G2V8B9 [403-422]	0	2330.02	20
FALSE	High	Unambiguous	VIAATNRADILDPAXMR	[K].VIAATNRADILDPAXMR.[-]					0.127245	0.00257247	0.134	1	205	2	A0A0D3AFH6	A0A1S3BXR3; A0A2G2W830; A0A1U8KXA1; A0A2P6R773; A0A200PWS3; A0A2P5BTN1; A0A1J6KAN3; Q9SEI2; A0A0V0IIU9; Q9AYS9; C6TAN1; A0A2G9I2R0; A9TFB1; A0A1U7WYT0; A0A194YSY5; A0A0E0HPY7; D8TJB3; I6UPQ5; A0A2G9GXL1; W0KMH1; M4CAC3; C0P9N3; A0A2P2MLD8; A0A0A0LJT3; A0A251TAX4; A0A061FAI4; D7T6C5; A0A2P2MLB5; A0A0C9QQY6; B4G1X9; W9RKL9; A0A1S4B2Z0; A0A0D9VMA6; A0A2C9VD34; A0A076GAA1; A0A1R3K886; I1LBA2; V7BIW3;…	A0A0D3AFH6	1	1840.01	17
FALSE	High	Unambiguous	LIGSPPGYVGYTEGGQLTEAVRR	[KR].LIGSPPGYVGYTEGGQLTEAVRR.[RI]					0.00354932	0	0.716	1	251	1	F6GT40	A0A1R3G2T9; A0A287IDE5; A0A0D6R715; F2EHD3; A0A0E0H027; D7LS18; W5ETZ9; A0A2G3A2X5; A0A1U8HQI9; A0A1J3EKI8; D7MQU9; A0A0D9VWD6; A0A218XL76; A0A1B6PCG3; A0A1D6EC46; A0A067EK53; A0A2R6PSI4; A0A078I4J7; I1JXP9; A0A088F9I1; M5WCY0; A0A251RV69; I1IA06; A0A2G5C466; A0A2J6JSX8; D8S131; B9GCG4; A0A0D3B420; A0A2H5QQ78; A0A1D5UH62; A0A103XWN6; A0A2N9GNG6; U5FZK2; I1KP32; A0A2G2WX76; Q9FI56; A0A1D6J623; A0A…	F6GT40 [742-764]	1	2420.26	23
FALSE	High	Unambiguous	TLVHKGYDPEVIDIR	[K].TLVHKGYDPEVIDIR.[S]					0.0749788	0.000962316	0.22	1	1	1	A0A2G3AYM0	A0A2G3AYM0	A0A2G3AYM0 [306-320]	1	1754.94	15
FALSE	High	Unambiguous	LYQMGVDWSTPTHGPLR	[K].LYQMGVDWSTPTHGPLR.[S]					0.00476816	0	0.668	1	1	1	731368266	731368266	731368266 [244-260]	0	1957.96	17
FALSE	High	Unambiguous	NPEQRQEAAESSAEAEYPTLSLSEIQNAR	[R].NPEQRQEAAESSAEAEYPTLSLSEIQNAR.[G]					4.31589e-05	0	1.433	1	2	1	731317196	731317198; 731317196	731317196 [165-193]	1	3218.52	29
FALSE	High	Unambiguous	SSLGNETPRSEVDAFGSVGPFR	[R].SSLGNETPRSEVDAFGSVGPFR.[S]					0.00348443	0	0.719	1	2	1	731358082	731358082; 731358084	731358082 [1088-1109]	1	2309.12	22
FALSE	High	Unambiguous	QILAHNGVLEIDSNLASNPGTR	[K].QILAHNGVLEIDSNLASNPGTR.[G]					0.0994952	0.00224036	0.174	1	1	1	731349429	731349429	731349429 [260-281]	0	2319.21	22
FALSE	High	Unambiguous	EAFPGDVFYLHSR	[R].EAFPGDVFYLHSR.[LS]					0.0290811	0	0.374	2	251	1	E5DKF8; E6ZE62	I1TKY3; Q5VL80; A0A2L0V1K4; B9UZD6; Q5S7Z5; I1TKW6; Q5S820; U5HSR4; E5DKE3; M9W8R4; Q09R44; Q2QKS8; B2LHP3; B2LHQ9; A0A0G3B880; Q3ZML8; Q3ZMK6; B2LHT7; E5DK64; B0FA48; Q09R45; Q8HFE1; Q8HFB7; R4I973; B2LHT0; A0A1B1LNE5; Q5VL96; E5DKF8; Q5S804; A0A0X9RV75; E5DKJ4; E5DK22; A0A0G3BDM7; G4Y9N6; A7KBD8; R4I960; P26854; T1VY35; Q9T687; Q8SIG2; E5DKK9; A0A193KRU4; A0A1W6EG67; A0A2H4V4D8; Q9T731; R4I9G1;…	E5DKF8 [245-257]; E6ZE62 [295-307]	0	1537.74	13
FALSE	High	Unambiguous	TVVSGLVNHIPIDEMQNR	[R].TVVSGLVNHIPIDEMQNR.[K]					0.0447279	0	0.304	1	1	1	731325249	731325249	731325249 [675-692]	0	2022.04	18
FALSE	High	Unambiguous	VSPTYHLYSPSEVETVIGR	[K].VSPTYHLYSPSEVETVIGR.[L]					0.00245407	0	0.776	1	1	1	731361751	731361751	731361751 [218-236]	0	2134.08	19
FALSE	High	Unambiguous	IFDHQGPLSSTFPIENR	[K].IFDHQGPLSSTFPIENR.[N]					0.0265184	0	0.389	1	3	1	731334367	731334367; A0A2G9HSY1; A0A068U4S8	731334367 [328-344]	0	1957.98	17
FALSE	High	Unambiguous	LAEIPISHIPDAVYR	[K].LAEIPISHIPDAVYR.[T]					0.00482717	0	0.666	1	1	1	731367989	731367989	731367989 [200-214]	0	1693.93	15
FALSE	High	Unambiguous	SQSQYIEVRPGEFIPLER	[K].SQSQYIEVRPGEFIPLER.[D]					0.00887395	0	0.567	1	5	1	731332195	731374695; A0A0K9Q8U9; A0A0J8BFA2; 731332195; 731374699	731332195 [57-74]	0	2148.11	18
FALSE	High	Unambiguous	VHSINDSLSAEDAASEYEFGIR	[R].VHSINDSLSAEDAASEYEFGIR.[Q]					0.000517769	0	1.029	1	1	1	731339087	731339087	731339087 [111-132]	0	2410.12	22
FALSE	High	Unambiguous	ILVTGGAGFIGSHLVDR	[R].ILVTGGAGFIGSHLVDR.[L]					0.00215674	0	0.797	1	89	1	731349068	A0A068TVT8; A0A1S3TWQ6; A0A1J3DRW3; A0A2K1ZC85; F8V2Y4; A0A2H3ZD45; A0A0D3C2P7; A0A2P6QIJ9; A0A1U8GVJ2; A0A0K9Q1U4; A0A1J6KI03; A0A2P5C6H4; A0A0K9S2V0; I3SLB7; A0A218XSC3; A0A1S3TWR2; A0A0S3SCW6; A0A2P5C9Z8; A0A175YP87; D8QXD2; A0A1S3CGJ7; A0A151TMH5; A0A2I0L1Y0; A0A1S4B059; G7JUT0; K4BPJ4; A0A1S3TK38; A0A2K3NYK7; A0A0A0KLN7; A0A2J6M8Z5; C6THA9; A0A0V0HWT1; A0A2N9GPE9; K7VK11; A0A2P4LRP4; A0A0D6R…	731349068 [32-48]	0	1711.95	17
FALSE	High	Unambiguous	VSPTYHLYSPSEVEAVISR	[K].VSPTYHLYSPSEVEAVISR.[L]					0.00143719	0	0.863	1	1	1	731363918	731363918	731363918 [218-236]	0	2134.08	19
FALSE	High	Unambiguous	IEGDLPLIGHYTPR	[K].IEGDLPLIGHYTPR.[D]					0.0067701	0	0.611	1	1	1	731332004	731332004	731332004 [138-151]	0	1580.84	14
FALSE	High	Unambiguous	ESQSDRYVVTELGFPR	[R].ESQSDRYVVTELGFPR.[I]					0.0487497	0	0.29	1	1	1	731334119	731334119	731334119 [214-229]	1	1882.93	16
FALSE	High	Unambiguous	AAQQDIANDLPPTHPIR	[K].AAQQDIANDLPPTHPIR.[L]					0.135316	0.00292848	0.124	1	1	1	731339701	731339701	731339701 [160-176]	0	1856.96	17
FALSE	High	Unambiguous	EEFLLAAQEAERR	[R].EEFLLAAQEAERR.[Y]					0.0929869	0.00187066	0.185	1	2	1	731366669	731366669; 731366671	731366669 [482-494]	1	1561.8	13
FALSE	High	Unambiguous	IASISMMSQEELGAAREER	[R].IASISMMSQEELGAAREER.[Q]					0.000638187	0	0.995	1	1	1	731334119	731334119	731334119 [280-298]	1	2108.01	19
FALSE	High	Unambiguous	ADLLVTGSHGYGQLTR	[K].ADLLVTGSHGYGQLTR.[A]					0.00195462	0	0.813	1	1	1	731326754	731326754	731326754 [124-139]	0	1687.88	16
FALSE	High	Unambiguous	NQTVDLVLTAHPTQSVR	[K].NQTVDLVLTAHPTQSVR.[RK]					0.0718194	0.000962316	0.227	2	252	1	A0A2P5A903; A0A2P5SBQ4	A0A2K2BMA7; Q9ZRQ3; A0A0B2SW26; A0A218PG18; M0TY01; A0A1S3YLC5; A0A077S3P8; Q5MX81; A0A1U8ECT4; Q5MXA1; Q9SWG7; A0A2I0LF24; A0A1J7GS78; B9RWB8; F1CT41; A0A1E1GF34; Q5MXA7; U5HTH1; A0A067E1A4; A0A1R3HFB2; A0A067KMT6; D7KKG4; A0A078GK13; A0A2H3ZH35; A0A287LME1; A0A1S4AJL4; A0A287RAA9; A0A1S3X7T0; S8E1E6; A0A1B6Q660; A0A1S4D398; D7LIU5; A0A0N9R4Z7; Q02735; A0A0K9Q3I3; A0A1J3E7B1; A0A2K2DF14; A0A0N9R…	A0A2P5A903 [162-178]; A0A2P5SBQ4 [154-170]	0	1879	17
FALSE	High	Unambiguous	LFISNPDLVHR	[R].LFISNPDLVHR.[FL]					0.0464092	0	0.298	1	4	1	731372184	A0A059CUJ5; 731372184; A0A218WP99; A0A059CVE1	731372184 [351-361]	0	1310.72	11
FALSE	High	Unambiguous	NLLGTAFHPELTADSR	[R].NLLGTAFHPELTADSR.[W]					0.0890687	0.000962316	0.192	1	1	1	731356231	731356231	731356231 [194-209]	0	1741.89	16
FALSE	High	Unambiguous	LIGAPPGYVGHEQGGQLTEAVR	[R].LIGAPPGYVGHEQGGQLTEAVR.[R]					0.214621	0.00825917	0.049	1	1	1	A8JA18	A8JA18	A8JA18 [649-670]	0	2249.17	22
FALSE	High	Unambiguous	EEREALGALPLYQR	[R].EEREALGALPLYQR.[ST]					0.00617349	0	0.626	1	2	1	731320240	731320240; A0A200PQK9	731320240 [112-125]	1	1644.87	14
FALSE	High	Unambiguous	VHPQEQAMEVGFEDSAAPQTLER	[R].VHPQEQAMEVGFEDSAAPQTLER.[L]					0.0004839	0	1.04	1	1	1	731343213	731343213	731343213 [78-100]	0	2569.2	23
FALSE	High	Unambiguous	WDLAPHDEVFR	[R].WDLAPHDEVFR.[N]					0.0619639	0.00054243	0.251	1	2	1	731315114	731315114; 731315112	731315114 [72-82]	0	1384.66	11
FALSE	High	Unambiguous	IGVPFVIGTTGGDRER	[K].IGVPFVIGTTGGDRER.[L]					0.0654904	0.000962316	0.242	1	6	1	A0A0J8E8H3	731367939; A0A0J8E8H3; 731362739; 731362741; A0A0K9RUG0; 1108786415	A0A0J8E8H3 [155-170]	1	1673.9	16
FALSE	High	Unambiguous	VVTQIVTQSSPTRPLSSTPVFR	[R].VVTQIVTQSSPTRPLSSTPVFR.[R]					0.00760927	0	0.592	1	1	1	731321112	731321112	731321112 [17-38]	0	2400.32	22
FALSE	High	Unambiguous	LNDELYEVHQIMTR	[K].LNDELYEVHQIMTR.[N]					0.0197397	0	0.437	1	209	1	A0A0E0FJ60	A0A0D9ZE82; A0A1J3IG29; A0A1D5ZKS3; A0A0E0GUR8; A0A1D6DGH7; A0A1D6RTU1; A0A218W7A2; A0A2K2BYU0; A0A1U7VCS7; A0A2I0VT73; A0A2R6R0G5; A0A0B0P0H1; A0A2P4H0S9; F6HXQ6; A0A0E0D822; A0A0V0HPJ8; A0A2G5CEI5; A0A1E5VXF7; A0A0E0GUR5; A0A0E0A6B7; K4C734; B6TMY9; A0A0E0JG27; M0U3J2; A0A1S3VEQ5; A0A2P2LU58; A0A178WBU4; A0A1D6MEX7; A0A1D5YCK5; Q307X8; M1A1D8; A0A200PPD7; A0A0K9S451; A0A2P2LU68; A0A0E0BZM0; A0A…	A0A0E0FJ60 [657-670]	0	1760.86	14
FALSE	High	Unambiguous	FTSFPERPPSQSGAFDDVR	[R].FTSFPERPPSQSGAFDDVR.[G]					0.00209143	0	0.802	1	1	3	731342204	731342204	731342204 [465-483]	0	2140.01	19
FALSE	High	Unambiguous	VGNILADHNVNVNFMSVGR	[K].VGNILADHNVNVNFMSVGR.[T]					0.000600121	0	1.005	1	2	1	731351924	A0A1Z4EAX3; 731351924	731351924 [565-583]	0	2056.04	19
FALSE	High	Unambiguous	EVNPQDQLFLMGHLR	[R].EVNPQDQLFLMGHLR.[N]					0.0683713	0.000962316	0.235	1	1	1	731322074	731322074	731322074 [29-43]	0	1796.91	15
FALSE	High	Unambiguous	ANNTHYGLAAGVFTQDIDTANTLAR	[R].ANNTHYGLAAGVFTQDIDTANTLAR.[A]					0.00215674	0	0.797	1	2	2	731342801	731342801; A0A0K9S2J2	731342801 [469-493]	0	2634.29	25
FALSE	High	Unambiguous	MGEAQVNRNQQPGQQPLSQTR	[R].MGEAQVNRNQQPGQQPLSQTR.[R]					0.000283388	0	1.127	1	1	1	731330073	731330073	731330073 [333-353]	1	2367.16	21
FALSE	High	Unambiguous	LVGANPDEIRR	[K].LVGANPDEIRR.[R]					0.0234492	0	0.409	1	1	2	731351242	731351242	731351242 [101-111]	1	1239.68	11
FALSE	High	Unambiguous	ISDRGDFMSGTSNR	[K].ISDRGDFMSGTSNR.[K]					0.0139026	0	0.494	1	4	2	731374939	A0A0K9QJU0; 731374939; A0A0K9QHU2; 731374941	731374939 [289-302]	1	1542.7	14
FALSE	High	Rejected	LISSGVPATVEHR	[R].LISSGVPATVEHR.[A]					0.0727082	0.000962316	0.225	0	1	1		A0A200RBZ4		0	1365.75	13
FALSE	High	Unambiguous	IENAALVGVHDR	[R].IENAALVGVHDR.[G]					0.00719954	0	0.601	1	1	1	731317218	731317218	731317218 [353-364]	0	1293.69	12
FALSE	High	Unambiguous	MNLTLSADHR	[KR].MNLTLSADHR.[VI]					0.144787	0.00292848	0.113	1	70	1	731319146	A0A2N9II48; A0A1J7GMH2; A0A0D2UX02; M5XFA2; A0A0K9QPS9; A0A1Q3CCK8; A0A1U8IFM0; A0A2I4HBR2; A0A1U8KD48; A0A251QIX2; A0A061FVV2; A0A2P5A575; A0A0D2RRQ9; A0A1U8KHL1; A0A2P5VRV7; A0A2P5WYV4; A0A067EJR5; A0A067EJH1; A0A2P6SJ28; A0A1U8IFS7; A0A166DQG1; A0A067LL14; B9HL53; A0A1R3GXX5; A0A1U8KD69; A0A2H5QBR9; A0A1U8KD52; A0A1U8KIB2; A0A1U8KHM1; A0A2C9V3J0; A0A2H5QBL8; A0A2P5C036; A0A1R3KH66; A0A2G5EGD9;…	731319146 [866-875]	0	1157.57	10
FALSE	High	Unambiguous	GASEHVLDEAER	[R].GASEHVLDEAER.[S]					0.0129932	0	0.505	1	75	1	731323478	G2XK63; A0A287S3F9; A0A0E0D3R0; A0A1D6MPG5; C5XFR5; F2DRC5; A0A0D9VWF2; Q6I610; A2XJL6; A0A287S3H2; K7UPD0; 731323478; J3M9L5; A0A0E0HHZ8; A0A1D6MPH4; A0A287S3D2; A0A0D3GAM4; A0A1D6S6P5; A0A0E0PR11; A0A0E0L5J6; K3XGI3; Q0DG27; A0A1D5XNE2; A0A287S3D6; A0A287S3E1; M7ZLD2; C5XP67; A0A287PIX1; A0A0D9WJJ6; W5FIY5; A0A0E0NYB5; A0A287S3N6; A0A1D6MPG8; Q10GP3; W5EK26; A0A1D6MPG7; K3XIA8; A0A287PI60; A0A2…	731323478 [372-383]	0	1312.61	12
FALSE	High	Unambiguous	VAAAEHISQFNEEAR	[RK].VAAAEHISQFNEEAR.[S]					0.00103106	0	0.917	1	202	2	A0A1R3HAA4	A0A218WW34; A0A2G5F8R0; A0A0D2V7D0; A0A0B0MYK4; A0A151SU62; A0A2K2B180; A0A1U7Z5V5; A0A0D2Q866; M4FHU9; A0A103XW78; A0A1D1YXW2; A0A078JXG1; A0A1U8A4Q6; A0A2H5PUT6; J3L3D9; A0A1S2XHB1; A0A061GMR6; A0A0E0JN42; A0A2G5F8R9; I1NR61; C3VEZ5; A0A2P2KLG9; A0A2K1WX08; A0A068AZ53; A0A2C9UA87; V4UK96; A0A0D2TCM8; A0A087HDW0; A0A059AHT7; F6M058; A0A0R0H7S6; A0A1D6NE83; A0A0B0N8E7; A0A1J3FH02; A0A0D3D2L9; V4S…	A0A1R3HAA4 [153-167]	0	1671.81	15
FALSE	High	Unambiguous	VLELVHSAGNDR	[K].VLELVHSAGNDR.[I]					0.108442	0.00224036	0.16	1	1	1	731344157	731344157	731344157 [118-129]	0	1309.69	12
FALSE	High	Unambiguous	LGIIEDAANRNR	[K].LGIIEDAANRNR.[L]					0.0663009	0.000962316	0.24	1	27	1	731360552	A0A067HB36; Q9STX5; M5XMY9; P35016; A0A165Y1A6; 731360552; A0A251SNA8; A0A068UGP7; A0A251R8M6; A0A067GZ61; A0A161XAI5; A0A067HAQ0; A0A103YA02; A0A2G5C6S6; A0A2C9TZL8; A0A1Q3AM91; A0A0K9QZ58; A0A2J6L9I6; A0A2G5C6X4; A0A067H1U3; A0A178UT76; F4JQ55; A0A2P6PZ78; D7M8W9; Q8RVG8; R0F3T9; V4TA70	731360552 [526-537]	1	1341.72	12
FALSE	High	Unambiguous	ISEPRPQGDNVAGGPNSLR	[R].ISEPRPQGDNVAGGPNSLR.[H]					0.0020033	0	0.809	1	1	1	731326488	731326488	731326488 [376-394]	0	1963.99	19
FALSE	High	Unambiguous	LRDSGFDEDSIR	[R].LRDSGFDEDSIR.[R]					0.0143368	0	0.489	1	1	1	731339329	731339329	731339329 [49-60]	1	1409.67	12
FALSE	High	Unambiguous	SAAGRPSGTDGSDFSFR	[R].SAAGRPSGTDGSDFSFR.[M]					0.00442893	0	0.68	1	1	1	731322665	731322665	731322665 [6-22]	0	1714.78	17
FALSE	High	Selected	STVHDVVLVGGSTR	[K].STVHDVVLVGGSTR.[I-]					0.0240332	0	0.405	1	253	6	731318762	M0Z8C6; D0ETH8; A0A1D5W3T1; A0A1D5YRV8; A0A1D5S806; A9YYH7; A0A1J6KP74; M4DQD2; A0A1D5U1Y0; A0A151S7R0; A0A1U8IVE8; A0A1S3BIM2; A0A200R6H1; A0A2J8AHY9; A0A2P5YS54; A0A1R3JR04; A0A140CZC8; M4CZD6; K6Z7B2; P27322; A0A287P8H5; A0A1D5ZF15; A0A287P8H0; A0A1D5Y2X9; A0A022RS05; A0A2P5Q747; A0A1D5ZF14; A0A2R6P7V0; A0A0D9ZF27; A0A287UWY9; A0A287M383; K4A6V7; A0A2P6SKA0; A0A1D6CRF5; A0A1D6A2T9; A0A1D6S391;…	731318762 [1210-1223]	0	1426.76	14
FALSE	High	Unambiguous	IVGEEHYEIAQR	[R].IVGEEHYEIAQR.[V]					0.00432131	0	0.684	1	256	2	P00825	A0A0P0IIA8; R4QI83; A0A0N7IR14; A0A0P0IIM4; R4QTD8; R4QTQ5; A0A023JHN9; O98774; B9TTJ5; A0A1B0YQ10; Q9TMQ4; Q08GS9; A0A139ZS21; W5IFC3; A0A139ZS17; Q9MRM2; A0A0P0IIH7; A0A240F5D8; A0A0P0IVY0; A0A0S0ZFM8; Q32VP8; A0A139ZX94; A0A1D6YXC4; I6P7X1; Q9GER1; G4WNV4; Q29VC0; A0A1W6EG35; U5KC15; A0A0P0HQ88; H6SWX2; A0A023JGH1; O98526; A0A2L0Q0R5; B9TTK1; I6P7X2; B9TTJ7; Q9XPZ2; A0A2K9VRR1; O98775; F1JYI8;…	P00825 [379-390]	0	1443.72	12
FALSE	High	Unambiguous	MGDLQSGRPGEVR	[K].MGDLQSGRPGEVR.[RTLFSK]					0.186312	0.00627731	0.072	1	26	1	G7JKU3	A0A1S3ECG5; C6T7D4; A0A0B2QDQ8; A0A1D1Z1J3; V7ALX5; A0A151RML6; I1KZR7; I3SIJ1; I1LVH9; A0A1S3BWM8; A0A1S3TGC0; G7JKU3; I1LVH8; A0A061DQ02; R0GJF8; 731364192; A0A0S3S8I3; A0A0A0KUI1; I3T8C8; A0A0L9V2F6; V4LQT3; A0A2K3NAG4; A0A0K9Q8W5; A0A1U8AHN2; A0A1J7HUY2; A0A1J7HB78	G7JKU3 [377-389]	0	1401.69	13
FALSE	High	Unambiguous	LAGVNTESPTGRQEEGR	[R].LAGVNTESPTGRQEEGR.[S]					0.0807216	0.000962316	0.208	1	2	1	E2DMZ2	E2DMZ2; 731338192	E2DMZ2 [194-210]	1	1800.88	17
FALSE	High	Unambiguous	NVRDGNAVLESDQR	[K].NVRDGNAVLESDQR.[L]					0.00479757	0	0.667	1	21	1	731353308	A0A2P6RIV5; A0A199V5H0; M0UPD8; A0A2K2D6Z1; A0A287KG64; A0A251NG67; A0A162A397; A9NST7; A0A0Q3IAQ9; A0A2P4KSE5; A0A251NG79; K3XJZ3; A0A151RHJ8; M5W2G3; C6TH73; A0A2P5AS13; 731353308; A0A2P5ETZ5; I1HCG6; A0A0B2P7C2; A0A0R0JWJ9	731353308 [250-263]	1	1572.77	14
FALSE	High	Unambiguous	YRPSSAYNAPYWTTNSGAPVWNNNSSLTVGPR	[K].YRPSSAYNAPYWTTNSGAPVWNNNSSLTVGPR.[G]					0.0220505	0	0.419	1	1	1	A0A2P5EY69	A0A2P5EY69	A0A2P5EY69 [6-37]	0	3527.67	32
FALSE	High	Unambiguous	NYGAVWDTSRVPSGPLQFR	[R].NYGAVWDTSRVPSGPLQFR.[F]					0.0356248	0	0.341	1	2	1	731357546	731357546; A0A2N9I8M5	731357546 [192-210]	1	2150.08	19
FALSE	High	Unambiguous	IQPFVLPPLGPHDVR	[K].IQPFVLPPLGPHDVR.[I]					0.00119505	0	0.893	1	1	3	731363489	731363489	731363489 [29-43]	0	1684.95	15
FALSE	High	Unambiguous	LLVDHSIIEAFGQGGR	[R].LLVDHSIIEAFGQGGR.[T]					0.0339145	0	0.349	1	1	1	731322678	731322678	731322678 [581-596]	0	1711.91	16
FALSE	High	Unambiguous	LLSIERNPPIDDVVRSGVVPR	[K].LLSIERNPPIDDVVRSGVVPR.[I]					0.0249366	0	0.399	1	3	1	A0A1J3EDA1	A0A1J3EDA1; A0A1J3IGQ5; A0A1J3H862	A0A1J3EDA1 [102-122]	2	2331.31	21
FALSE	High	Unambiguous	NLNIPINNVIHPNYEEVVPR	[R].NLNIPINNVIHPNYEEVVPR.[E]					0.000492911	0	1.037	1	1	1	731356654	731356654	731356654 [293-312]	0	2344.24	20
FALSE	High	Unambiguous	SPLHLAQPAAASSHYHFIQQQQQQQQQR	[K].SPLHLAQPAAASSHYHFIQQQQQQQQQR.[F]					0.130414	0.00257247	0.13	1	1	3	A0A2K3MN43	A0A2K3MN43	A0A2K3MN43 [132-159]	0	3255.62	28
FALSE	High	Unambiguous	SNNNDPFLNLHPEISLLR	[R].SNNNDPFLNLHPEISLLR.[G]					0.0265184	0	0.389	1	1	1	1108951321	1108951321	1108951321 [71-88]	0	2093.08	18
FALSE	High	Unambiguous	FLKNGDAGMVKMTPTKPMVVETFSEYPPLGR	[K].FLKNGDAGMVKMTPTKPMVVETFSEYPPLGR.[F]					0.0692175	0.000962316	0.233	1	39	1	A0A078J6X1	M4DP02; R0I523; M4EPI7; A0A1B1LN72; A0A1J3ERF5; M4DUR0; A0A0D3C8E5; A0A078J6X1; B9DI33; A0A1J3IW90; A0A1J3IGU5; Q56ZD4; A0A078HAI0; A0A078G8C9; A0A223LMS3; A0A1J3FEN6; D8L1X2; A0A0D3DYH8; D7KHX2; A0A1J3IMJ3; A0A1J3CXR3; F4HUA0; A0A078EW64; P94010; R0I652; R0IT90; A0A1J3GJU8; Q56YZ4; A0A1J3I883; M4DQ76; M4DUQ8; A0A0D3ED38; A0A067ZYQ0; V4N969; A0A0D3B2F8; A0A2L1IQF7; Q94BW6; A8TUA6; A0A178WJC9	A0A078J6X1 [359-389]	2	3440.74	31
FALSE	High	Unambiguous	VRRPSDYNPSLAATLGPSQPSQNLNLAAVGLTPGASGGLEGPDR	[K].VRRPSDYNPSLAATLGPSQPSQNLNLAAVGLTPGASGGLEGPDR.[I]					0.167816	0.00563879	0.089	1	1	1	A0A087GK88	A0A087GK88	A0A087GK88 [306-349]	1	4401.25	44
FALSE	High	Unambiguous	TLEAEAAHGTVTR	[KR-].TLEAEAAHGTVTR.[H]					0.0078469	0	0.587	1	386	2	A0A1R3GP69	A0A059AGF2; Q4VCI1; A0A067KV94; A0A2I0X4B9; A0A1Z5R408; A0A2C9U900; S8E6J2; A0A0E0KSM1; A0A067DU62; A0A0E0JLW3; A0A0D3FXS3; Q4VCA7; Q4VCE1; A0A0L9UIR8; A0A0V0I6R3; A0A0L9VPE3; Q4VCE4; A0A2I0XBR5; 731318867; A0A2R6Q1J5; A0A0R0GQK7; A0A1U7XFE0; B8ARN5; G3BMV7; A0A1J6IKJ3; A0A078F345; A0A078IAU4; K3Y6V4; A0A1D6E6B3; A0A1J7GQ50; A0A1W0VYP8; I1IZH5; A0A022R4Q9; A0A0E0BZY5; A0A0V0IFR5; Q4VCI3; M4CIV0; …	A0A1R3GP69 [1313-1325]	0	1355.69	13
FALSE	High	Unambiguous	QAISHAGNGDEAANSVER	[R].QAISHAGNGDEAANSVER.[V]					0.100727	0.00224036	0.172	1	2	1	731366669	731366669; 731366671	731366669 [48-65]	0	1825.84	18
FALSE	High	Unambiguous	EGGGGGYGGGGGGYGGGGNRGYGGGGGGGDR	[R].EGGGGGYGGGGGGYGGGGNRGYGGGGGGGDR.[Y]					0.214621	0.00825917	0.049	1	1	1	731358684	731358684	731358684 [127-157]	1	2490.02	31
FALSE	High	Unambiguous	FDREGAASTEYNNASR	[R].FDREGAASTEYNNASR.[S]					0.193315	0.00652397	0.066	1	1	1	731357675	731357675	731357675 [356-371]	1	1787.79	16
FALSE	High	Unambiguous	NQMQVNVTADHR	[KR].NQMQVNVTADHR.[VI]					0.0970775	0.00187066	0.178	1	79	1	731310808	B4FD17; A0A0B0NT00; A0A2G9I0Q3; A0A0D2QNL8; A0A2I0XH89; M5VM14; 731310808; A0A1E5UTN7; A0A176WGC8; A0A2K1Y4C0; A0A2P2Q582; A0A2G2WYT7; B9GC67; A0A1R3H908; V4L0S8; K4D6M8; A0A067H878; R0ICH7; A0A0D3HS32; A0A2R6X2G8; A0A2G3CMJ1; B9SLH2; A0A218W0U3; A0A2K3PEF9; A0A151U5Y4; A0A1U8PIR7; J3NBW5; A0A0D3CRS4; I3RZE4; D7KK66; A0A1Z5R4Y7; I1R4L1; A0A2I4E6L0; A0A072VNF5; A0A1U7XZS5; A0A2C9U265; A0A2G2ZPE0; …	731310808 [426-437]	0	1412.67	12
FALSE	High	Unambiguous	TFYTDSNGRDFLER	[K].TFYTDSNGRDFLER.[IV]					0.178461	0.00596827	0.079	1	26	2	A0A2K3NL60	A0A251P8D5; A0A022QA98; A0A068V9U7; A0A1S3U7E7; A0A2K3NL60; A0A151R392; I1JXQ5; A0A2R6P908; S8EH80; A0A1S2YA36; A0A2I0JBV3; A0A059AP45; A0A1S3U790; A0A2C9VQB3; A0A0S3RF53; A0A0L9UEV9; A0A2G9HED1; M5WXQ9; A0A1S2YBP0; A0A251RVN2; I1KBX4; A0A1S3E9J3; A0A218WUG8; A0A1Q3AWR7; G7J3A3; A0A068TQU2	A0A2K3NL60 [504-517]	1	1720.79	14
FALSE	High	Selected	TSVHDVVLVGGSTR	[K].TSVHDVVLVGGSTR.[I]					0.0240332	0	0.405	1	3	3	G7IQ90	A0A072V6P7; G7IQA8; G7IQ90	G7IQ90 [1433-1446]	0	1426.76	14
FALSE	High	Unambiguous	VGDALEWVHR	[K].VGDALEWVHR.[E]					0.185169	0.00627731	0.073	1	34	2	A0A2P2Q5C0	A0A1J7H7F2; A0A1U7Y5S7; A0A178V7D0; S8CYE4; D7LA42; Q66YT8; A0A1S3ZE57; A0A077D9P5; A0A1U7W6S4; A0A1J7H7S8; A0A1S3TKG0; A0A1W6FXW7; A0A0D3CI99; A0A0C6FQX1; M4E111; A0A1R3HPN2; A0A1U7YHU9; A0A1U7YEE8; A0A1J6IPJ8; A0A2G9G265; A0A0K9RFF7; I1LPL0; A0A0L9V7K9; A0A068VAI8; A0A1R3HZ12; A0A2N9GMG7; A0A067LF35; A0A2P2Q5C0; R0I1K3; V7AHW2; E4MVQ4; B9RPY4; A0A151TMT0; 731354706	A0A2P2Q5C0 [404-413]	0	1181.61	10
FALSE	High	Unambiguous	YGVADEHFEVVR	[K].YGVADEHFEVVR.[F]					0.026682	0	0.388	1	1	1	733215452	733215452	733215452 [179-190]	0	1420.69	12
FALSE	High	Unambiguous	IIGNMGDQWSDLIGDHPGMR	[R].IIGNMGDQWSDLIGDHPGMR.[T]					0.00370545	0	0.709	1	1	2	731357328	731357328	731357328 [235-254]	0	2212.03	20
FALSE	High	Unambiguous	LTGRSDDTVSMIEQYLR	[K].LTGRSDDTVSMIEQYLR.[A]					0.213305	0.00825917	0.05	1	1	1	731329677	731329677	731329677 [443-459]	1	1983.98	17
FALSE	High	Unambiguous	TDVFDLPFHMGR	[KR].TDVFDLPFHMGR.[GD]					0.0947185	0.00187066	0.182	1	6	1	A0A251T6J1	731354252; 731354250; A0A0K9QAF0; A0A0K9Q8A1; A0A251T6J1; A0A161YM56	A0A251T6J1 [280-291]	0	1434.68	12
FALSE	High	Unambiguous	IDTLDLAHLLR	[K].IDTLDLAHLLR.[I]					0.0512082	0	0.282	1	2	2	A0A0J8DWD6	A0A0J8DWD6; A0A0J8B2E8	A0A0J8DWD6 [173-183]	0	1279.74	11
FALSE	High	Unambiguous	VAAAAAASSPYSSFFPPVAVTPMAHAGR	[K].VAAAAAASSPYSSFFPPVAVTPMAHAGR.[V]					0.000560865	0	1.016	1	7	3	731371796	731371796; 731371800; 731371812; 731371808; 731371815; 731371804; 1108863585	731371796 [707-734]	0	2731.37	28
FALSE	High	Unambiguous	VVNAPNDSPFSSLGDVMPHLR	[R].VVNAPNDSPFSSLGDVMPHLR.[A]					0.000560865	0	1.016	1	1	1	1108875682	1108875682	1108875682 [672-692]	0	2252.11	21
FALSE	High	Unambiguous	FAARNLDTTDLVALSGAHTIGR	[R].FAARNLDTTDLVALSGAHTIGR.[A]					0.00337891	0	0.724	1	1	1	A0A2P5CLX9	A0A2P5CLX9	A0A2P5CLX9 [57-78]	1	2299.22	22
FALSE	High	Unambiguous	AFSLAPNEPEVLLLDYPSHQR	[R].AFSLAPNEPEVLLLDYPSHQR.[R]					0.166787	0.00487918	0.09	1	3	1	731356598	731356596; 731356594; 731356598	731356598 [374-394]	0	2396.22	21
FALSE	High	Unambiguous	WGVNVQPYSGSPANFAAYTAVLNPHDR	[K].WGVNVQPYSGSPANFAAYTAVLNPHDR.[I]					0.000166986	0	1.213	1	25	3	731325199	A0A1Z4EAY0; A0A1J6KKZ7; A0A0J8FG73; M0TWL9; M1BAA6; A0A1Q3ATB0; A0A161Y5N4; A0A2G9GT43; A0A1U8AZ14; A0A1J6IML0; A0A1S4CP79; K4C261; K4DHM2; M1A0B7; A0A0V0IFG5; A0A022QS28; A0A1S4DIW7; A0A0C9S0T3; A0A0V0I7X4; A0A1S4ARC4; A0A2G9HMZ1; A0A0K9RCF9; A0A1U7VDD2; A0A1S3X4P8; 731325199	731325199 [161-187]	0	2931.42	27
FALSE	High	Rejected	WGVNVQPYSGSPANFAAYTGLLNPHDR	[R].WGVNVQPYSGSPANFAAYTGLLNPHDR.[I]					0.00580525	0	0.636	0	1	1		A0A2H3X1E1		0	2931.42	27
FALSE	High	Unambiguous	DRFPPSQQEYPILGLNLLR	[R].DRFPPSQQEYPILGLNLLR.[L]					0.0802267	0.000962316	0.209	1	1	1	A0A0J8B9E3	A0A0J8B9E3	A0A0J8B9E3 [97-115]	1	2256.21	19
FALSE	High	Unambiguous	LEDRGQEPSVVSNISR	[R].LEDRGQEPSVVSNISR.[E]					0.0853156	0.000962316	0.199	1	1	1	731344528	731344528	731344528 [245-260]	1	1785.91	16
FALSE	High	Unambiguous	DAALSPTVPVGTLATLLANATPEHQR	[R].DAALSPTVPVGTLATLLANATPEHQR.[L]					0.00254632	0	0.77	1	1	2	731360293	731360293	731360293 [553-578]	0	2643.41	26
FALSE	High	Unambiguous	VTTTDDPVIRR	[RKQ].VTTTDDPVIRR.[L]					0.100727	0.00224036	0.172	1	118	2	731369461	W9SMB7; A0A1R3H4F0; A0A0K9PLN1; A0A2R6QLF6; B4FWK0; A0A1J6KNS1; A9RBL3; A0A2P6QEM6; A0A0C9S786; A0A2K2BTA7; A0A0B0MST7; A0A2I0WM92; A0A1D1XT08; A0A2P2LB49; C5XFY4; A0A2K1KT80; A0A1E5VLB1; A0A2H3YGB9; A0A2H5N2R0; A0A072U5R5; A9SLQ4; A0A0E0D6D7; A0A199VZ00; A0A151T796; A0A2G3BD26; A0A2P5X1I4; A0A2P5QXR8; A0A2G9GH93; A0A2K1JL79; A0A1U8L9W0; B7FLT6; W1P0Q7; A0A1S2XCE8; A0A1R3I1I2; A0A2P5CBJ5; A0A2N9I…	731369461 [247-257]	1	1272.69	11
FALSE	High	Unambiguous	FLKNGDAGMVNMIPTKPMVVETFSEYPPLGR	[K].FLKNGDAGMVNMIPTKPMVVETFSEYPPLGR.[F]					0.190952	0.00652397	0.068	1	1	1	A0A022PRB6	A0A022PRB6	A0A022PRB6 [381-411]	1	3438.73	31
FALSE	High	Unambiguous	VAEIQNEGLGEHR	[K].VAEIQNEGLGEHR.[L]					0.190952	0.00652397	0.068	1	91	1	A0A1D6LI49	A0A2K3PJA0; A0A1S2XPR8; A0A103XCR5; V7B7K9; A0A2P4GKN0; R0G6Q9; A0A1U8GWH1; A0A2P5W7Z4; A0A2P4MTJ6; A0A1D6S7S5; K7LDA5; A0A0D3ACG5; A0A199UWQ7; A0A0S3T4M7; A0A1U8NSK7; A0A0S3SUR4; Q9LS97; A0A2P6QVL2; A0A151SY02; A0A1R3GCW9; A0A2N9EJ01; A0A2I0VAI6; V7BPM7; A0A2G2ZIJ0; A0A1D6S7S4; A0A0R0JL42; A5AII6; A0A1D6ATC3; J3LEJ1; W9SMM7; A0A251VCQ9; A0A2H9ZUP9; A0A1Q3CD06; A0A287U813; A0A2C9WI68; A0A2H3XBL2;…	A0A1D6LI49 [117-129]	0	1451.72	13
FALSE	High	Unambiguous	IEELVGVPIHYIGVGPGR	[R].IEELVGVPIHYIGVGPGR.[DENR]					0.000862631	0	0.946	1	34	4	731324064	A0A2P6P1I5; A0A2P5WN25; A0A2K3LKM8; A0A2G5CC15; A0A2J6LAD7; A0A2J6KLZ8; M0S290; I3SL90; A0A2G9HR29; G7KTL4; A0A1S3X9F6; A0A2H3YPN8; A0A2G5CC52; A0A2P2IVH0; A0A1S3ZLP3; M0U9N9; A0A2C9V780; A0A1J6IF20; 731324064; A0A1U8JFH1; A0A2K3MFK7; A0A251SBF3; A0A1U7ZSN7; A0A0B0MJH7; D7TI00; A0A2P5RT89; A0A2G5D5Q3; A0A2P6P1H2; A0A0D2QBG1; A5B050; M5VMS5; A0A068UR22; A0A151TU70; A0A218W2Z3	731324064 [468-485]	0	1905.06	18
FALSE	High	Unambiguous	IDILDPALLRPGR	[R].IDILDPALLRPGR.[FI]					0.018223	0	0.45	1	22	4	A0A0K9QG12	A0A1I9LK86; A0A0K9QG12; A0A1C9JBQ1; Q9SST5; W8SY61; K8ENT6; D8RGS0; D8S5C9; A0A0K9QIE2; A0A2P6V5H6; A0A1Y1HST8; 731353494; D8TGQ5; A0A2P4LFU5; A0A2P6TMM9; A0A059LS41; A0A2P4M659; A0A1D1XJW0; I0YP69; 731320262; A0A2P0QI59; E1ZHX9	A0A0K9QG12 [296-308]	0	1448.86	13
FALSE	High	Unambiguous	LFNDELTLDNISRPR	[K].LFNDELTLDNISRPR.[LIV]					0.0116316	0	0.523	1	153	1	A0A103XHY4	A0A2G2VEB0; A0A022RAA6; A0A2K3NNH4; A0A1U8I8I2; S8CZV8; A0A1S3ZWJ8; M5VWN9; A0A1S3UWZ3; A0A0K9RVW6; A0A1J3DUC0; A0A1Q3BGI6; A0A124SEK4; A0A067GNX6; A0A022RHQ1; A0A068UIP2; A0A1J3IX68; A0A059D2B8; A0A2R6RS22; A0A151UBX6; A0A2K1JVE3; A0A1J3FIU4; A0A0S3QYW5; I1KSP4; A0A2C9WGV0; A0A2I4FMK1; A0A0D6R0M2; A0A067GBS3; A0A0A0LHI1; A0A2P2M538; A0A1S3VY02; A0A061F287; A0A1U7V1F4; A0A151TAT4; A0A2I0IM90; A0A…	A0A103XHY4 [354-368]	0	1802.94	15
FALSE	High	Unambiguous	NLGLEYDMSGLTGNTLDSHR	[R].NLGLEYDMSGLTGNTLDSHR.[L]					0.0078469	0	0.587	1	2	1	A0A061ENB0	A0A061ENB0; A0A061EFK8	A0A061ENB0 [115-134]	0	2193.02	20
FALSE	High	Unambiguous	THTTDAAPASTFASSTGGFDTSYGELYR	[R].THTTDAAPASTFASSTGGFDTSYGELYR.[G]					0.000438551	0	1.056	1	1	1	731329959	731329959	731329959 [387-414]	0	2911.3	28
FALSE	High	Unambiguous	LSTVSAIASGTILGMHEDNR	[K].LSTVSAIASGTILGMHEDNR.[F]					0.00887395	0	0.567	1	1	1	731352776	731352776	731352776 [208-227]	0	2072.04	20
FALSE	High	Unambiguous	MGLNDQDIVALSGGHTLGR	[R].MGLNDQDIVALSGGHTLGR.[A]					0.00342073	0	0.722	1	1	1	A0A151TMV3	A0A151TMV3	A0A151TMV3 [147-165]	0	1953.98	19
FALSE	High	Unambiguous	LRSYQDLDAPEDEVTVIDYR	[R].LRSYQDLDAPEDEVTVIDYR.[S]					0.0165152	0	0.466	1	74	2	731348501	A0A2C9V1L9; A0A1U8MJT8; A0A2G5DYL3; A0A2P4L132; A0A251VE17; A0A1S3BRT0; A0A1J6IWG4; A0A2P5QSC5; A0A2P5FUM1; A0A1R3J9F4; A0A059AAA1; A0A1Q3DB33; A0A0B0NPR8; A0A1S3ZUE2; A0A2G3AI64; A0A2P5QHH1; A0A0D2THE2; A0A1U8M2W8; A0A0B0N9G3; A0A199W281; A0A248XBF3; A0A2P5VXR8; A0A2G3DEL1; A0A0B0NLT4; A0A1U8M382; A0A1S3YC03; A0A1S3ZUG0; A0A1U8JE70; A0A251SX33; A0A1D1YHW6; A0A200R856; A0A251NR17; A0A0V0IU10; A0A…	731348501 [723-742]	1	2397.16	20
FALSE	High	Rejected	VEILDPALLRPGR	[R].VEILDPALLRPGR.[F]					0.0958907	0.00187066	0.18	0	1	1		A0A1C9JB02		0	1448.86	13
FALSE	High	Unambiguous	AQSEIMNWGNSGMSVMEMSHR	[K].AQSEIMNWGNSGMSVMEMSHR.[G]					0.000328462	0	1.103	1	1	2	731337742	731337742	731337742 [85-105]	0	2382.01	21
FALSE	High	Unambiguous	TLVDYGAGSLGGFQPVAPSHYGR	[R].TLVDYGAGSLGGFQPVAPSHYGR.[H]					0.000695571	0	0.981	1	1	1	731314786	731314786	731314786 [156-178]	0	2349.16	23
FALSE	High	Unambiguous	EFVAKGLSVGDMVALSGAHSIGR	[K].EFVAKGLSVGDMVALSGAHSIGR.[A]					0.177367	0.00596827	0.08	1	1	1	A0A2J6JW59	A0A2J6JW59	A0A2J6JW59 [182-204]	1	2301.2	23
FALSE	High	Unambiguous	TAVASSNSSASPFRDTEIENELNELR	[R].TAVASSNSSASPFRDTEIENELNELR.[R]					0.000520963	0	1.028	1	1	1	731326198	731326198	731326198 [303-328]	1	2837.35	26
FALSE	High	Unambiguous	QGFQDLGASSLQSAHDLIR	[KR].QGFQDLGASSLQSAHDLIR.[STAL]					0.00135146	0	0.873	1	47	3	731318116	A0A0A9JZR3; S8D964; A0A2G9GMF0; A0A0E0D7P5; A0A0K9RUD6; 731318118; M4F224; D7KWI2; F2DQP9; A0A0A9IR61; A0A0A9HD07; A0A287SI01; R7VYU2; A0A1J3ENY1; Q9ZPA0; J3LTD6; A0A2K1ZDW9; F6H9U0; A0A2I4FI19; A0A2J6M8X6; V4S548; A0A2P6Q850; A0A151QVG2; B9RRP5; A0A2H5NQL5; A0A067L913; A0A1J3E0A3; Q84XA3; A0A2R6QDT4; A0A0D9VZR2; A0A2P5CGB1; M0UFT6; A0A067F2L2; A0A1D5ZUF4; A0A2P5FM16; 731318116; W9RD41; A0A1E5URA…	731318116 [454-472]	0	2043.03	19
FALSE	High	Unambiguous	QMLGFGGPLSGIR	[K].QMLGFGGPLSGIR.[T]					0.0667099	0.000962316	0.239	1	1	1	731332018	731332018	731332018 [404-416]	0	1332.71	13
FALSE	High	Unambiguous	SEGLIPAPEPTHALAAVIR	[R].SEGLIPAPEPTHALAAVIR.[E]					0.00794401	0	0.585	1	2	4	731315608	A0A0K9QYU3; 731315608	731315608 [420-438]	0	1942.08	19
FALSE	High	Unambiguous	YGNAATEEDIPRELLLGQSER	[K].YGNAATEEDIPRELLLGQSER.[Q]					0.00706792	0	0.604	1	1	1	731336505	731336505	731336505 [349-369]	1	2361.17	21
FALSE	High	Unambiguous	QVTVDRPDVAGR	[R].QVTVDRPDVAGR.[VI]					0.0696445	0.000962316	0.232	1	167	1	A0A1W0VV84	A0A0A0L5S9; A0A1R3ISE8; A0A2P5WT00; D7MTG5; A0A2G5DTS7; A0A1D1XKB9; A0A1Y5IPE7; A0A250XLM8; A0A1U8KYC4; F6H0B6; A0A1S3BW69; A0A1S4B8T4; A0A2G5DTS8; A0A2G9I1F4; Q39102; A0A2G5DTU1; A0A2H3ZD97; A0A176WQF9; A0A103YER0; A0A1E5WMV5; A0A1S4DML1; M8ADT2; A0A2R6RME1; A0A2K3NWD1; A0A2R6PZE6; A0A0D2M9T5; A1KXM7; A0A2H5PA46; V4TAA2; U6BY64; M4CJ63; A0A0E0HVR0; A0A0E0LFU2; A0A022R8Y8; A0A2R6WDJ2; A0A2I4FXM0;…	A0A1W0VV84 [484-495]	0	1312.7	12
FALSE	High	Unambiguous	TAPASSSSSVDSARLEPR	[K].TAPASSSSSVDSARLEPR.[V]					0.00510189	0	0.657	1	1	1	E2JFE1	E2JFE1	E2JFE1 [46-63]	1	1817.9	18
FALSE	High	Unambiguous	SSGSNDIRDVSVNEER	[R].SSGSNDIRDVSVNEER.[Q]					0.0623462	0.00054243	0.25	1	1	1	731321648	731321648	731321648 [601-616]	1	1763.82	16
FALSE	High	Unambiguous	NAADSIQLEHITR	[K].NAADSIQLEHITR.[I]					0.00215674	0	0.797	1	1	2	731352504	731352504	731352504 [219-231]	0	1467.76	13
FALSE	High	Unambiguous	LASIGLDNTEANRQAYR	[RK].LASIGLDNTEANRQAYR.[QT]					0.00742436	0	0.596	1	24	1	731345174	M0U9P4; M1D0A6; W9R2N5; Q38JH2; A0A251S332; K3XIT0; A0A067KRU0; A0A251RVM7; S8CAG8; 731345174; A0A0V0I7Z5; A0A2H3WZ35; A0A1U8EMG9; A0A2J6JNH7; A0A199V319; A0A1S4D0G2; A0A2I4GH14; A0A2H3ZK10; A0A068JIB0; S8D525; A0A103XVF6; A0A0K9QU20; K4BX34; A0A1J6IKQ9	731345174 [86-102]	1	1891.96	17
FALSE	High	Unambiguous	MQYLFDDTGRR	[K].MQYLFDDTGRR.[Y]					0.108442	0.00224036	0.16	1	5	1	731326779	A0A0K9QF86; 731326779; A0A1U8ANJ7; A0A059A1E9; A0A059A050	731326779 [87-97]	1	1401.66	11
FALSE	High	Unambiguous	LQGLDIQDPNGHVR	[R].LQGLDIQDPNGHVR.[S]					0.00368273	0	0.71	1	2	1	731343067	731343069; 731343067	731343067 [1106-1119]	0	1561.81	14
FALSE	High	Unambiguous	IQAVSVAPDRFESR	[R].IQAVSVAPDRFESR.[K]					0.147484	0.00292848	0.11	1	1	1	A0A0K9RBK8	A0A0K9RBK8	A0A0K9RBK8 [313-326]	1	1574.83	14
FALSE	High	Unambiguous	QHDNYYPPAEMAPPPDR	[R].QHDNYYPPAEMAPPPDR.[Q]					0.029441	0	0.372	1	1	1	A0A0J8CIE0	A0A0J8CIE0	A0A0J8CIE0 [382-398]	0	1997.88	17
FALSE	High	Unambiguous	VQIIQQINHDGEVNR	[K].VQIIQQINHDGEVNR.[A]					0.0219153	0	0.42	1	67	1	A0A2N9IZG3	A0A2C9VV42; O22466; Q1I184; A0A2K3P9K0; A0A2R6Q6R2; A0A2I4EH34; A5BDM6; S8D767; A0A2N9IZG3; A0A0V0IAP4; A0A1S2YGZ9; A0A2C9V309; I6WY45; A0A067E7K4; A0A067JY70; W1NQR5; A0A2G2W8U8; A0A2H5PXZ4; M5X021; A0A2P6SDE9; A0A1S3AWJ3; A0A022PQE7; A0A2H3Y766; B1ABR9; A0A2K2BME4; A0A2K2BME7; A9PHH9; A0A2G5D8I9; A0A2P5DLK7; B0LUS9; A0A1U7ZV51; B1ABR4; A0A2J6K2Q6; A0A1Q3DC39; A0A1D1ZDS9; A0A103YL23; B9IB49; A0A…	A0A2N9IZG3 [116-130]	0	1762.92	15
FALSE	High	Unambiguous	GAQDIANGELAPTHPIR	[K].GAQDIANGELAPTHPIR.[L]					0.00636628	0	0.621	1	1	2	731312715	731312715	731312715 [159-175]	0	1759.91	17
FALSE	High	Unambiguous	LINYIEDEEHGVR	[R].LINYIEDEEHGVR.[L]					0.00398926	0	0.697	1	14	2	V4UE52	B9SN83; A0A067E3N0; A0A0D2PQC1; V4RSK6; A0A251KZD6; A0A0D2N8K5; A0A0D2LXR0; 731357091; A0A2P5RNV4; A0A0B0PW97; A0A2P5XHX5; V4UE52; A0A0K9RXA6; A0A2H5Q5D0	V4UE52 [518-530]	0	1586.78	13
FALSE	High	Unambiguous	LAPTIGIAVDHR	[KR].LAPTIGIAVDHR.[RC]					0.106459	0.00224036	0.163	1	157	1	731332983	A0A1S3UC59; M1CVD3; W1PWL1; M0U7Z5; A0A059LQY3; A0A218VXQ5; A0A059C334; A0A1U8P724; A0A2I0VUZ7; A0A1U7UWG6; A0A2I0HWE0; A9RPU7; A0A2K1KVF4; 731321126; A0A059CJW2; A0A1J3DLV1; B9IIX6; M0SNA1; A0A1U8BBP6; K4CMT7; 731332983; A0A2H3WYH8; A0A1Q3BFL9; A0A2H9ZRQ2; A0A1J3GT61; A9PAV6; A0A0D6R217; D7TSM7; A0A124S088; A0A0V0HFH3; A0A124SB86; A0A1R3JQB3; A0A1S3XLC6; W9RJ94; A0A1J3G0D3; A0A0B2PEN5; A0A2R6Q9F…	731332983 [89-100]	0	1262.72	12
FALSE	High	Unambiguous	LLNQDPFHEVR	[KR].LLNQDPFHEVR.[R]					0.0154349	0	0.477	1	11	1	731348116	A0A067KX76; A0A2R6PT65; A0A2R6PV66; A0A0K9Q291; W9QL32; R7W6A0; 731348116; A0A200QEP8; A0A2I4FTM4; 731348118; A0A0K9RH42	731348116 [55-65]	0	1367.71	11
FALSE	High	Unambiguous	TAPADFRFPTTNQTR	[K].TAPADFRFPTTNQTR.[H]					0.107777	0.00224036	0.161	1	115	1	S8D991	A0A2C9UM85; B9SQE4; A0A1D1YUE4; A0A0A9KQE4; A0A1E5VPT8; A0A199UWL4; A0A067KRE2; A0A0R0FKK9; C9EIK4; A0A287IRY1; A0A0E0CGV5; A0A0D9ZMN7; A9NS65; A0A067FGN4; A0A068U308; A0A0B2RJN0; V7CD64; A0A2H3Y7M4; A0A1D6Q4N7; A0A078G2Y4; V4LUY0; K4CB98; A0A2G9GBB8; A0A0A0LH49; 731352733; K3YUQ4; A0A1U8FEI2; C6T6B8; A0A2P6QU01; A0A2G9HL25; I1PMP3; A0A059CKS4; A0A1U8ALZ7; A0A0K9RMC5; A0A0A9KBQ1; A0A022RBL2; A0A0…	S8D991 [464-478]	1	1722.86	15
FALSE	High	Unambiguous	TLDAHIEEQFGGGR	[R].TLDAHIEEQFGGGR.[L]					0.0994952	0.00224036	0.174	1	4	1	731329943	731329943; I3S9U3; I3RZA9; A0A0J8BCW0	731329943 [163-176]	0	1529.73	14
FALSE	High	Unambiguous	HQEYFADNPSTGMDPASRDE	[K].HQEYFADNPSTGMDPASRDE.[-]					0.0185623	0	0.447	1	3	1	A0A2P5F9V0	A0A2P5F9V0; 731362630; W9RZ86	A0A2P5F9V0 [129-148]	1	2266.93	20
FALSE	High	Unambiguous	YSTPIGYNVGNTRGDSMANSTSR	[R].YSTPIGYNVGNTRGDSMANSTSR.[N]					0.0149675	0	0.482	1	1	4	731329959	731329959	731329959 [287-309]	1	2448.12	23
FALSE	High	Unambiguous	ENPAIVQSYYDRR	[K].ENPAIVQSYYDRR.[I]					0.201819	0.00652397	0.059	1	1	2	731359282	731359282	731359282 [97-109]	1	1610.79	13
FALSE	High	Unambiguous	SENSQNRDAGSTASTAILVGDR	[K].SENSQNRDAGSTASTAILVGDR.[L]					0.0450038	0	0.303	1	24	1	A0A0K9RDG6	A0A1J3CRV8; A0A2G9H561; A0A2P4JS08; A0A2I4G6K3; A0A0D3BLX5; R0GQR7; D7MAV9; A0A1J3FHX1; A0A2R6R4N6; A0A0K9RDA7; A0A1J3K9K8; A0A0K9RF60; A0A1P8B4X7; R0FB15; A0A2I4FPS6; A0A2I4FPP9; A0A0K9RDG6; A0A078GD63; M0T0U4; 1108786836; 1108786848; A0A078HQF6; V4MC93; A0A178UT68	A0A0K9RDG6 [151-172]	1	2249.08	22
FALSE	High	Unambiguous	YDSTHGPFTGTIR	[K].YDSTHGPFTGTIR.[V]					0.00232193	0	0.785	1	1	2	731363395	731363395	731363395 [130-142]	0	1451.69	13
FALSE	High	Unambiguous	VVSEVEGTDLRR	[R].VVSEVEGTDLRR.[E]					0.161736	0.00409645	0.095	1	1	1	731352012	731352012	731352012 [118-129]	1	1359.72	12
FALSE	High	Unambiguous	ASIEAAEELHR	[K].ASIEAAEELHR.[K]					0.163738	0.0044837	0.093	1	1	1	731339079	731339079	731339079 [129-139]	0	1225.62	11
FALSE	High	Unambiguous	MEMLQHEAQEEESR	[K].MEMLQHEAQEEESR.[R]					0.00424231	0	0.687	1	1	1	731351234	731351234	731351234 [373-386]	0	1746.74	14
FALSE	High	Unambiguous	SSPVSGNDLYSERENER	[R].SSPVSGNDLYSERENER.[G]					0.0458418	0	0.3	1	1	1	731337907	731337907	731337907 [445-461]	1	1938.88	17
FALSE	High	Unambiguous	EGRVDTESVVVER	[R].EGRVDTESVVVER.[V]					0.181784	0.00627731	0.076	1	1	1	731323566	731323566	731323566 [296-308]	1	1474.75	13
FALSE	High	Unambiguous	LVTSGVPATVEHR	[R].LVTSGVPATVEHR.[ARST]					0.0100354	0	0.547	1	67	2	A0A2P5YDX5	M5X2G3; A0A1U8HXU3; A0A0D2SYW0; M4DWK2; A0A1J6ILZ1; A0A1J6IIH8; V4MFE7; A9PBK3; A0A1S3Z8P4; A0A0V0HQJ9; B9HYZ8; M4DAM6; A0A2G2VBC4; A0A2G3A938; A0A2G3D6K9; A0A1S4DKE1; A0A1Q3AUS0; D6BR67; A0A2P6Q3P6; V4W8C9; A0A061GEU0; A0A0K9QSV0; A0A1R3I226; A0A1S3XV64; R0HCZ7; A0A2H5N2B1; K4BFE7; A5BEL8; A0A2P5QEH4; D7MES4; A0A2R6PXT5; B9S615; A0A2G2WWT9; 731369614; 731354719; A0A251IUM3; A0A0D3A4V7; A0A0D3BKQ…	A0A2P5YDX5 [440-452]	0	1365.75	13
FALSE	High	Unambiguous	MLVNVTADHR	[K].MLVNVTADHR.[IV]					0.0858419	0.000962316	0.198	1	108	2	731340762	A0A0D3A0G8; A0A1U8M2H3; A0A2P2LTW1; B9ST02; A0A1D6KPB2; V7BAP6; A0A1U7WQG3; A0A2H5P3R0; K3YHG5; A0A1J6ITI8; A0A0D2SAC6; A0A0A0KR34; C0P972; A0A287SRY1; A0A061EBS5; A0A2G9GKX0; V4KZK8; A0A2G2YCC8; M1AZL8; A0A0K9RR30; A0A1S4BLB5; A0A1U7VWC3; V4TH22; A0A2R6PH22; A0A1S2XZX6; A0A2C9UKJ3; A0A2G5D866; I1NFH4; K3YHG0; I1NFH5; A0A1D1XQF4; A0A0E0ELT1; A0A0E0LV41; A0A0E0IC70; A0A061ECF5; A0A1J7HKK2; A0A0D9X…	731340762 [447-456]	0	1155.59	10
FALSE	High	Unambiguous	ITDSLMMHGR	[R].ITDSLMMHGR.[N]					0.185169	0.00627731	0.073	1	1	1	I0YZL1	I0YZL1	I0YZL1 [64-73]	0	1160.56	10
FALSE	High	Unambiguous	TAETLAMDYHR	[R].TAETLAMDYHR.[GAS]					0.0947185	0.00187066	0.182	1	105	1	A9SUD7	A0A2P6RAB1; A0A0K9PEE6; A0A022RMG8; A0A0L9TXL1; A0A0K9PSR9; A0A103FGS7; A9TDH4; A0A0D3B749; A0A0D3DV64; A0A2K1JYP3; A0A0D2ZPR7; A0A2P5VP16; A0A2K1KPP9; A0A0C9RHF4; A0A1J3ITT9; K4AJY0; A0A1U8IQN1; A0A0D2V1C5; V7BFX0; A0A2K1XUS2; V7D0D3; A0A059DDR6; A9SAC8; V7CY42; A0A0D6R1Z1; A0A0R0FH68; V7C7N8; B3H4I6; B9IIV8; A0A0S3SRH6; A0A0R0JEC6; M1ASV8; A0A251NVE5; A0A251T533; A0A087GXK1; A0A1J3FDM8; A0A2K1X…	A9SUD7 [359-369]	0	1307.6	11
FALSE	High	Unambiguous	FVATEGEGLHPEPNR	[K].FVATEGEGLHPEPNR.[Q]					0.0243306	0	0.403	1	1	2	731353988	731353988	731353988 [154-168]	0	1652.8	15
FALSE	High	Unambiguous	NTSVVQDEVLSHR	[K].NTSVVQDEVLSHR.[L]					0.00321669	0	0.732	1	1	3	A0A0J8CGG5	A0A0J8CGG5	A0A0J8CGG5 [99-111]	0	1483.75	13
FALSE	High	Unambiguous	HFEESDNENAASSEFPNNQSR	[R].HFEESDNENAASSEFPNNQSR.[M]					0.000695571	0	0.981	1	2	1	731328823	731328827; 731328823	731328823 [349-369]	0	2409	21
FALSE	High	Unambiguous	NPGYEAQRGPTYDSQGGQVYNAQR	[R].NPGYEAQRGPTYDSQGGQVYNAQR.[A]					0.000271447	0	1.134	1	1	2	731316859	731316859	731316859 [319-342]	1	2656.21	24
FALSE	High	Unambiguous	LSETAQAAEAAASAAHR	[K].LSETAQAAEAAASAAHR.[M]					0.00391634	0	0.7	1	1	1	731355004	731355004	731355004 [237-253]	0	1654.81	17
FALSE	High	Unambiguous	LIATELQSETASSRDR	[R].LIATELQSETASSRDR.[L]					0.0388281	0	0.327	1	1	1	731321652	731321652	731321652 [22-37]	1	1776.91	16
FALSE	High	Unambiguous	APDAFYAR	[K].APDAFYAR.[R]					0.169893	0.00563879	0.087	1	1	2	A0A164UTU6	A0A164UTU6	A0A164UTU6 [1490-1497]	0	910.442	8
FALSE	High	Rejected	WALDNIVTR	[K].WALDNIVTR.[G]					0.0663009	0.000962316	0.24	0	1	1		A0A2H3XF68		0	1087.59	9
FALSE	High	Rejected	SSIHDVVLVGGSTR	[K].SSIHDVVLVGGSTR.[I]					0.0658944	0.000962316	0.241	1	39	2	A0A176WEL9	A0A072U7P3; A0A1D1YLV0; A0A176WEL9; C9WCK6; A9S0A3; A0A0K9NPB0; Q7Y1W0; A9SNF1; A0A1D1Y9S2; A0A2R6PWY9; A0A0Y0BSD8; D8RBE2; D8RYR3; Q5MCL0; A0A1D1XZB0; A0A072U8L6; A0A2R6XGV7; A0A072U7Q7; A0A2J6M0L9; Q8LKP8; A0A2H3ZD96; A0A0A1HAD2; D8SUY5; A0A0E3KJY5; A0A0K9Q3W1; A9RCV9; A0A0K9Q1I8; A0A251SC78; A0A2K3LX93; A0A251UZB2; A0A124SCR6; A0A072U8M5; A0A0K9Q1T9; A0A1D1YHS3; A9TWR9; A0A2K1KW60; A0A097NU89;…	A0A176WEL9 [407-420]	0	1426.76	14
FALSE	High	Unambiguous	ELVALSGGHTVGQAR	[R].ELVALSGGHTVGQAR.[C]					0.00310016	0	0.738	1	1	1	731344682	731344682	731344682 [183-197]	0	1494.8	15
FALSE	High	Unambiguous	VLYSSVVYPHNYGFIPR	[R].VLYSSVVYPHNYGFIPR.[T]					0.0418021	0	0.315	1	251	1	A0A1D5SN50	A0A0E0JUA9; A0A2H5NR74; A0A0E0CQB6; M0TNJ4; C6T1I1; A0A2G9HC46; A0A067KH77; E1ZQX8; A0A0E0M7I9; A0A077RQ84; A0A0D2PSY9; A0A1Q3AWA6; Q2P9V1; I1HMB7; A0A1U8AMH5; I1PRV8; A0A1J7GMB1; B4UWA9; B9S6D8; A0A1S2YYS8; A0A2I4FCP3; A0A2P6VJY1; A0A151TYC2; B8AXA3; A0A2G5CUH5; A9PC87; A0A0E0JRG4; A0A1Z5S7B1; A0A1U7VKY8; A0A1S2XX19; A0A2G9HE20; A0A2K1ZN30; A0A1D5VNP9; D7TQG4; A0A0E0KXQ5; A0A2H5NY32; I1NVQ3; A0A…	A0A1D5SN50 [82-98]	0	2011.04	17
FALSE	High	Unambiguous	NSAMNPVREIPVVGGSGVFR	[R].NSAMNPVREIPVVGGSGVFR.[M]					0.0374214	0	0.333	1	1	1	731357819	731357819	731357819 [146-165]	1	2086.09	20
FALSE	High	Unambiguous	YRPASAYNSPYLTNNNGTPVWNDNSSLTVGPR	[K].YRPASAYNSPYLTNNNGTPVWNDNSSLTVGPR.[G]					1.82447e-05	0	1.573	1	1	1	731361773	731361773	731361773 [6-37]	0	3525.68	32
FALSE	High	Unambiguous	LVLEVAQHLGENMVR	[R].LVLEVAQHLGENMVR.[TI]					0.0929869	0.00187066	0.185	1	136	1	731341013	A0A0A0KTA5; O82722; A0A0D2VYM2; A0A251TZI0; A0A061E5Q6; A0A0A0KPJ2; A0A2H3XR79; A0A1U8FHC9; A0A0D2S1Z3; K3Z538; A0A059BEJ4; A0A1E5WI54; A0A0D2V4L6; A0A0D2VYM6; A0A1D6NFC0; A0A0V0IJL8; A0A1J6K2R3; B8A7M8; A0A0E0L5G3; P19023; A0A2G5F6M9; A0A1U8F1W2; A0A1S3CT27; A0A1U7Z806; C6GFP3; A0A0D3GAJ4; O24345; F6HFL0; A0A251U5D0; B6SVV9; A0A1S4CK04; A0A1U7W1V5; A0A0D9YDB5; A0A2I0VXW6; A0A1B6PA06; A0A2P5S6E2;…	731341013 [117-131]	0	1707.92	15
FALSE	High	Unambiguous	FGSKGLREAADLVALSGAHTVGR	[K].FGSKGLREAADLVALSGAHTVGR.[A]					0.0252452	0	0.397	1	5	1	Q9ST84	A3AYW1; Q5U1N0; Q9ST84; A2XZ81; Q7XSU6	Q9ST84 [211-233]	2	2312.25	23
FALSE	High	Unambiguous	VEIIANEQGNRITPSWVTFADGGER	[R].VEIIANEQGNRITPSWVTFADGGER.[L]					0.214621	0.00825917	0.049	1	1	1	A0A1D6S6U2	A0A1D6S6U2	A0A1D6S6U2 [55-79]	1	2759.37	25
FALSE	High	Unambiguous	MASTFVGNSTSIQEMFRR	[KR-].MASTFVGNSTSIQEMFRR.[VG]					0.00368273	0	0.71	1	59	1	731360530	A0A2R6R017; A0A1S4DF33; A0A1S3BB81; A0A218WR49; A0A1P8FAP3; Q38MV0; A0A200Q765; A0A2P5S1R4; A0A2R4IRR8; A0A2G9FXJ1; F6H1L2; A0A2P5F812; P46264; W9RZB2; A0A2G2X1I7; A0A0D3D0Z2; A0A2N9FQY6; A0A1U7UXV3; A0A2R6R3N4; A0A0A0LPG6; 731360530; A0A192AB30; A0A0V0GGQ0; B1PBW3; A0A2P5DBS5; A0A022RF11; A0A1J3EBE8; A0A0K9R506; B9R897; A0A2C9VN99; P46263; V4K965; A0A2P6PZ73; A0A0D2R4T8; A0A087GFN2; B5M4B1; M0TN…	731360530 [368-385]	1	2061.98	18
FALSE	High	Unambiguous	GHSAAFSPPPFSPLDMLQQQQQQQQR	[R].GHSAAFSPPPFSPLDMLQQQQQQQQR.[A]					0.000957704	0	0.929	1	2	1	731343067	731343069; 731343067	731343067 [1025-1050]	0	2951.42	26
FALSE	High	Unambiguous	HINTLFVSGLPDDVIPR	[R].HINTLFVSGLPDDVIPR.[E]					0.0116316	0	0.523	1	2	1	731349601	731349601; 731349603	731349601 [63-79]	0	1893.02	17
FALSE	High	Unambiguous	HAGDLGNIVANTDGVAEATIIDNQIPLSGANSVVGR	[R].HAGDLGNIVANTDGVAEATIIDNQIPLSGANSVVGR.[A]					0.0330904	0	0.353	1	1	1	731355634	731355634	731355634 [154-189]	0	3558.81	36
FALSE	High	Unambiguous	QVAAGGTHSVVLTR	[R].QVAAGGTHSVVLTR.[ED]					0.0135648	0	0.498	1	88	1	W9RXJ7	A0A251SGQ8; A0A072TUS6; A0A151S172; A0A1J3I7G5; A0A2G3D7P9; A0A1U8F791; A0A067F6X7; A0A1P8BGN0; D7M7I9; A0A2H5NUY2; A0A1J3J6H7; A0A0D2SMA6; A0A0B2PIG0; A0A1J3JI71; A0A2I0KN56; A0A2P5DY28; A0A1R3JIY3; A0A2H3YM00; A0A2N9FDS0; A0A1S2Z7Z5; R0I310; M4DY39; Q9LFS0; A0A1J3GQ00; A0A2K3P1E8; A0A2P5F6S2; A0A1R3IC37; A0A1J3FYK4; V4LH52; V4N7H7; A0A1U8AR60; A0A178VFH0; B9RSM6; A0A078GPA7; A0A0D3AG08; A0A2I4D…	W9RXJ7 [506-519]	0	1395.77	14
FALSE	High	Unambiguous	FRGNDQPSADLGPSR	[R].FRGNDQPSADLGPSR.[D]					0.00173906	0	0.832	1	1	1	731323630	731323630	731323630 [55-69]	1	1616.78	15
FALSE	High	Unambiguous	HLEDEFAR	[R].HLEDEFAR.[LY]					0.193315	0.00652397	0.066	1	2	1	1108819365	K4AIH8; 1108819365	1108819365 [22-29]	0	1016.48	8
FALSE	High	Unambiguous	HTENSEETVASVMR	[K].HTENSEETVASVMR.[R]					0.00138512	0	0.869	1	3	1	731326490	A0A0K9QIB0; 731326490; A0A0J8CL57	731326490 [259-272]	0	1589.72	14
FALSE	High	Unambiguous	NSFTGDASMLFGENNDHLQTINLSR	[R].NSFTGDASMLFGENNDHLQTINLSR.[N]					0.000417496	0	1.064	1	1	1	731323960	731323960	731323960 [228-252]	0	2781.29	25
FALSE	High	Unambiguous	LLAALAESQRR	[K].LLAALAESQRR.[Q]					0.204317	0.00685958	0.057	1	6	1	731327704	A0A0J8BE80; A0A0K9QFU3; 731327706; 731327704; 1108916988; 1108909589	731327704 [134-144]	1	1227.72	11
FALSE	High	Unambiguous	SHTVAAQGGINAALGNMTEDDWR	[R].SHTVAAQGGINAALGNMTEDDWR.[W]					0.000395015	0	1.073	2	139	2	A0A251NBW0; 731337301	A0A2K1ZNA2; A0A0E0LGQ8; A0A0B0PMX6; A9TP02; A0A2C9WKE4; A0A0S3R454; A0A0E0AK20; B9FVD6; B9SWW3; U5D4X5; A0A199VUR0; A0A2P2JRE4; A0A078GVQ2; A0A0D2T1P6; A0A251S412; I1J8V9; A0A2P5S8U0; A0A0D9WVA6; A0A2K1ZNA5; A0A1U7Y773; A0A0L9TPB1; A0A1D1Z2H6; A0A1S2YSM2; A0A1U8FPG4; A0A150GEU4; A0A2G3D7Q7; V4MDN9; A0A0C9QU62; A0A1U8JUC8; A0A0A7M870; A0A2P5FXL5; A0A2P6TSL3; A0A2P5ST36; A0A1S3UI92; A9S7B3; D7SPF1;…	A0A251NBW0 [85-107]; 731337301 [87-109]	0	2414.12	23
FALSE	High	Unambiguous	FASIPNVLPSEHIR	[K].FASIPNVLPSEHIR.[G]					0.0575556	0.00054243	0.263	1	1	2	731364163	731364163	731364163 [69-82]	0	1579.86	14
FALSE	High	Unambiguous	TGAETREELQNSLLAR	[K].TGAETREELQNSLLAR.[S]					0.0100973	0	0.546	1	1	1	A0A0J8B9W9	A0A0J8B9W9	A0A0J8B9W9 [652-667]	1	1787.92	16
FALSE	High	Unambiguous	AFITAVDHLR	[K].AFITAVDHLR.[Q]					0.0374214	0	0.333	1	1	1	731330989	731330989	731330989 [76-85]	0	1142.63	10
FALSE	High	Unambiguous	FASMRDDWAINNR	[K].FASMRDDWAINNR.[Y]					0.0423194	0	0.313	1	2	1	731350936	731350936; A0A0K9R422	731350936 [525-537]	1	1595.74	13
FALSE	High	Unambiguous	HVPEIEQGLSDVAR	[R].HVPEIEQGLSDVAR.[S]					0.0452814	0	0.302	1	3	1	731364377	731364377; 731364379; 731378481	731364377 [261-274]	0	1549.8	14
FALSE	High	Unambiguous	SHPGGPPASEFDWGTGETPR	[K].SHPGGPPASEFDWGTGETPR.[R]					0.00107641	0	0.91	1	2	1	731353239	731353239; A0A0K9R0V4	731353239 [64-83]	0	2081.93	20
FALSE	High	Unambiguous	HSLNIPATADDAEALR	[R].HSLNIPATADDAEALR.[V]					0.00141092	0	0.866	1	1	1	731323116	731323116	731323116 [303-318]	0	1693.85	16
FALSE	High	Rejected	FATVPNVIPSELHR	[R].FATVPNVIPSELHR.[A]					0.0700742	0.000962316	0.231	0	1	1		A0A059D9Z7		0	1579.86	14
FALSE	High	Unambiguous	VVDXLAPYRR	[K].VVDXLAPYRR.[G]					0.176279	0.00596827	0.081	1	257	4	P00825	Q9MUT5; A0A1S5S1J7; O98926; Q85V24; C3VYV1; H6X0W3; Q9TMM7; Q9TMQ4; Q9MU81; A0A075W4A3; A0A2P1AL83; E3W0B5; Q95DR6; P20858; P28250; Q85V31; A7Y3E6; Q9TMV0; A0A1D8DG58; Q95AD7; Q4VMY6; A4QKJ9; Q85V35; A9XUI1; Q9BA84; W8E3D3; Q95FL8; A0A075W6C5; P07137; Q85V58; P06284; O98925; Q9GES5; R4QFY7; Q29SA0; A0A067Z198; A0A0F6PZ82; Q06GZ0; Q32RI0; W8CFG7; Q9MU80; P26531; Q5J051; A0A2H5A4Z0; Q70XZ6; Q9MU76;…	P00825	1	1201.71	10
FALSE	High	Unambiguous	AMTEMNGVVLSTRPMR	[R].AMTEMNGVVLSTRPMR.[T]					0.0400406	0	0.322	1	2	1	731329625	731329625; A0A0K9Q959	731329625 [242-257]	0	1792.89	16
FALSE	High	Unambiguous	YFTSTPAATNPASLPRPPR	[R].YFTSTPAATNPASLPRPPR.[K]					0.00269124	0	0.761	1	1	1	731334262	731334262	731334262 [295-313]	0	2044.06	19
FALSE	High	Unambiguous	NSFVNSVRELPVSGATGR	[R].NSFVNSVRELPVSGATGR.[F]					0.0287256	0	0.376	1	1	1	731326200	731326200	731326200 [143-160]	1	1889.98	18
FALSE	High	Unambiguous	NIRPSAVDNNFSMPQSTSLR	[R].NIRPSAVDNNFSMPQSTSLR.[G]					0.00210433	0	0.801	1	1	2	731359399	731359399	731359399 [345-364]	0	2234.1	20
FALSE	High	Unambiguous	VFNILRENNPELAGDR	[R].VFNILRENNPELAGDR.[RH]					0.0565034	0.00054243	0.266	1	120	2	A0A200R3M8	A0A067LDY4; A0A200QTB6; A0A1S2XKH6; A0A1R3GQF4; A0A2G9HTG8; A0A151U170; H9BNZ8; A0A2P4LQ93; A0A1U8QBF2; B7FK94; A0A1J3JZS3; U7DZ45; A0A2P5RIC9; A0A1U8AHF8; A0A218XQH7; A0A1U8MY99; K4CAB5; A0A2P5BLP5; C6TP03; A0A2C9WIG6; W9QYM9; A0A059ARE2; V7B8W2; A0A2K1R445; A0A251ISP3; A0A0D2TRZ0; I1JHM4; A0A1S2Y6W3; A0A022RIK9; A0A2G5EE20; A0A151U156; A0A1U8H294; A0A078F7L1; A0A072UZG4; A0A1S4D6X6; A0A0C9S8V1;…	A0A200R3M8 [463-478]	1	1856.96	16
FALSE	High	Unambiguous	ASILNRPSSLNAITTSMAGR	[R].ASILNRPSSLNAITTSMAGR.[L]					0.168851	0.00563879	0.088	1	1	1	A0A0J8FQR4	A0A0J8FQR4	A0A0J8FQR4 [53-72]	0	2060.09	20
FALSE	High	Unambiguous	SHPGGPAIAEFDWGTGETPR	[K].SHPGGPAIAEFDWGTGETPR.[R]					0.0896182	0.000962316	0.191	1	1	1	A0A1D1XX12	A0A1D1XX12	A0A1D1XX12 [71-90]	0	2081.97	20
FALSE	High	Unambiguous	FVETAEAHFR	[KR].FVETAEAHFR.[L]					0.0349736	0	0.344	1	36	1	A0A2G2XSP4	A0A0D2S159; A0A2G3DHJ8; A0A2P6S800; A0A1U8M8C0; A0A0A0K886; A0A1R3HHE6; A0A1U7Z756; A0A0D2MZK4; A0A2P5RPN4; A0A1U8J045; A0A067LG91; 731316270; F6HBE6; B9RVK2; A0A2P5WJX8; A0A0D2QZ58; A0A0B0Q076; A0A0D2QZ67; A0A0D2PDD6; A0A2C9VHG1; A0A175YFY1; Q9LE95; K4AYG3; A0A068VB65; A0A2C9V617; A0A2G2XSP4; A0A200PYS3; A0A1Q3C573; A0A2C9V664; A0A0V0I338; A0A0D2R6B8; W9RKB9; A0A1R3K158; M5X1N4; A0A1U8DX72; A0A2…	A0A2G2XSP4 [156-165]	0	1206.59	10
FALSE	High	Unambiguous	STVHEVVLVGGSTR	[K].STVHEVVLVGGSTR.[I]					0.00295132	0	0.746	1	10	1	731318762	G1FET0; A0A2G5EBF4; A0A2G5EBB8; A0A2G5EBC6; A0A022RQ47; A0A022RB34; A0A2G5EBY1; A0A2J6LJT6; 731318762; A0A022R076	731318762 [335-348]	0	1440.78	14
FALSE	High	Unambiguous	FSNVDLTYRR	[K].FSNVDLTYRR.[Q]					0.0890687	0.000962316	0.192	1	1	1	731324005	731324005	731324005 [384-393]	1	1270.65	10
FALSE	High	Unambiguous	AFRDELSLLQR	[R].AFRDELSLLQR.[I]					0.0713791	0.000962316	0.228	1	2	1	A0A0K9RE76	A0A0K9RE76; 731351719	A0A0K9RE76 [235-245]	1	1347.74	11
FALSE	High	Unambiguous	QYYSILHTSPALVYR	[R].QYYSILHTSPALVYR.[F]					0.0268466	0	0.387	1	1	1	731368649	731368649	731368649 [25-39]	0	1810.95	15
FALSE	High	Unambiguous	SHMPQSGFPESNNFAPNSNYGPPGMPNR	[R].SHMPQSGFPESNNFAPNSNYGPPGMPNR.[T]					0.000234198	0	1.158	1	1	1	731341195	731341195	731341195 [233-260]	0	3031.32	28
FALSE	High	Selected	IDYAPGGGLNPPHTHPR	[R].IDYAPGGGLNPPHTHPR.[A]					0.0768462	0.000962316	0.216	1	5	1	B6TWC3	B6TWC3; A0A0D9UZ28; I1IHZ3; A0A0E0JGD5; A0A1D6HTL7	B6TWC3 [108-124]	0	1798.9	17
FALSE	High	Rejected	IDYQPGGLNPPHTHPR	[R].IDYQPGGLNPPHTHPR.[A]					0.0709414	0.000962316	0.229	0	4	1		A0A2P5QD34; A0A1U8L5P7; A0A1U8N9B9; A0A2P5Y8Q9		0	1798.9	16
FALSE	High	Unambiguous	VQQALEAVLGHLR	[K].VQQALEAVLGHLR.[K]					0.00613564	0	0.627	1	1	1	731317968	731317968	731317968 [198-210]	0	1433.82	13
FALSE	High	Unambiguous	LATVLGHFVLAAILLLR	[K].LATVLGHFVLAAILLLR.[A]					0.0947185	0.00187066	0.182	1	1	1	A0A0K9R9N0	A0A0K9R9N0	A0A0K9R9N0 [66-82]	0	1820.15	17
FALSE	High	Unambiguous	LGDAADPNAGAGALELSPHNNVHVWTGSSSIR	[R].LGDAADPNAGAGALELSPHNNVHVWTGSSSIR.[G]					0.0481537	0	0.292	1	1	1	731339177	731339177	731339177 [327-358]	0	3213.57	32
FALSE	High	Unambiguous	LVEDFMGGNDASHDVAHVFR	[K].LVEDFMGGNDASHDVAHVFR.[V]					0.00424231	0	0.687	1	1	1	731354612	731354612	731354612 [14-33]	0	2216.02	20
FALSE	High	Unambiguous	ITAAQVLDHPWLR	[R].ITAAQVLDHPWLR.[VD]					0.0646898	0.000962316	0.244	1	2	2	Q84RQ1	Q84RQ1; 731329667	Q84RQ1 [348-360]	0	1519.84	13
FALSE	High	Unambiguous	HGFSNLTGVDYSEGAINLAR	[K].HGFSNLTGVDYSEGAINLAR.[G]					0.00526121	0	0.652	1	1	1	731315944	731315944	731315944 [187-206]	0	2121.04	20
FALSE	High	Unambiguous	SRPWNPSEMPGFSLDAPPNLR	[R].SRPWNPSEMPGFSLDAPPNLR.[T]					0.0225997	0	0.415	1	2	1	A0A0K9REL7	A0A0K9REL7; 731315082	A0A0K9REL7 [389-409]	0	2368.15	21
FALSE	High	Unambiguous	LPPLGPHDVR	[KR].LPPLGPHDVR.[V]					0.163738	0.0044837	0.093	1	21	1	A0A2P5C9W0	A0A068U4P0; A0A2P5QPA5; A0A0D2T8F2; A0A0B0NSQ3; A0A2P5D9F5; A0A2P5WC14; A0A2P5WC10; A0A2P5WC26; A0A0D2TE84; A0A0B0PQI9; A0A2P5QPA9; A0A2P5C9W0; K3YI96; A0A0D2RNW6; W9RVC1; A0A0D2UB64; M0SQC5; A0A2C9VS69; A0A0B0PKZ4; A0A0B0PQ51; A0A1U8NEA9	A0A2P5C9W0 [36-45]	0	1100.62	10
FALSE	High	Unambiguous	VLGLWPSPFVMRPR	[K].VLGLWPSPFVMRPR.[I]					0.108442	0.00224036	0.16	1	1	1	731344225	731344225	731344225 [7-20]	0	1654.93	14
FALSE	High	Unambiguous	SSFANETPRADSDPFGSAASFRPSLSSETPR	[R].SSFANETPRADSDPFGSAASFRPSLSSETPR.[A]					0.0667099	0.000962316	0.239	1	2	1	731358082	731358082; 731358084	731358082 [1110-1140]	1	3271.53	31
FALSE	High	Unambiguous	TANIRDLYMLGR	[RK].TANIRDLYMLGR.[K]					0.120393	0.00257247	0.143	1	4	1	731358117	A0A068V1N8; A0A2I0A3H0; 731358117; A0A2P4L0U5	731358117 [112-123]	1	1422.75	12
FALSE	High	Unambiguous	WFGGGGGIPDIRR	[R].WFGGGGGIPDIRR.[G]					0.0444536	0	0.305	1	1	1	1108898286	1108898286	1108898286 [226-238]	1	1387.72	13
FALSE	High	Unambiguous	LFMHGVPVDYNGPR	[K].LFMHGVPVDYNGPR.[K]					0.0233054	0	0.41	1	1	1	731310854	731310854	731310854 [114-127]	0	1601.79	14
FALSE	High	Unambiguous	STLHLVLR	[K-ER].STLHLVLR.[LY]					0.179562	0.00596827	0.078	1	18	1	A0A1R3JJS8	K7L2S2; R0GB45; A0A2P6PNY7; A0A1R3JJS8; W1PXN9; K7NP73; H9ME30; A0A059A6J6; Q42214; Q1A7U2; A0A287XMC0; A0A1D6CU02; Q1A7U3; R0FS17; Q8GTD9; K4CIZ3; A0A199UAS3; A0A2K2ANR5	A0A1R3JJS8 [1414-1421]	0	938.578	8
FALSE	High	Unambiguous	SFTSEFPHVER	[K].SFTSEFPHVER.[YL]					0.041291	0	0.317	1	158	1	A0A0E0JXE8	K3YSU7; A0A068UT16; A0A0D2SUQ6; V7BU45; A0A2P6PFB6; A0A067L1W0; A0A1D6QQD4; A0A2P5EEL6; B9SKB3; A0A059VEW8; A0A0D9WRD7; A0A2P5ABJ3; A0A0D9WRE0; A0A251KGD8; A0A0D9WRE1; A0A2G9H1R1; A0A1U7YT59; A3BCY2; Q0E2Q7; A0A067DDP8; U7E2H0; A0A200QCA7; A0A2I4EEQ0; A0A0E0JXF4; A0A0E0E323; C6TNT2; A0A059ATR6; C6TN38; A0A2H5QTV6; A0A0D2TX56; A0A2K2AYR6; A0A2P5BIZ7; A0A151SB75; A0A0E0CI21; A0A2P2MBI6; I1LTA5; M0U…	A0A0E0JXE8 [201-211]	0	1335.63	11
FALSE	High	Unambiguous	FPVPFYPELIQLR	[R].FPVPFYPELIQLR.[L]					0.178461	0.00596827	0.079	1	2	1	A0A1S2XX64	A0A1S2XX64; A0A1S3E3J1	A0A1S2XX64 [1611-1623]	0	1618.9	13
FALSE	High	Unambiguous	YGQMNEPPGAR	[-].YGQMNEPPGAR.[M]					0.130414	0.00257247	0.13	1	1	1	A0A125S9W3	A0A125S9W3	A0A125S9W3 [1-11]	0	1219.55	11
FALSE	High	Unambiguous	LAIEYIHNHPMSS	[K].LAIEYIHNHPMSS.[-]					0.148393	0.00292848	0.109	1	1	1	731360739	731360739	731360739 [117-129]	0	1511.73	13
FALSE	High	Unambiguous	LREAQPSAIVDEMR	[KR].LREAQPSAIVDEMR.[K]					0.0597191	0.00054243	0.257	1	65	2	A0A0J8C157	A0A0D2TCL3; A0A0S3SPS9; A0A2P2JZZ0; A0A151RI77; A0A2P5BPB0; I1MQC8; A0A2I0JLB4; K7LK09; A0A151RKL6; A0A2R6Q1I2; A5BR49; A0A251RTW2; W9RQ79; A0A251MRK7; I1NIE5; A0A067FVY8; I1L3P5; A0A1S2XXF6; A0A118JWW2; A0A0K9QFD0; V4SN16; A0A2P5R228; A0A0J8BXK2; A0A022QB28; A0A2J6LES9; A0A1R3GXD4; A0A2P6R3R7; A0A1S3V2E4; M5VL36; A0A2N9IL48; A0A2P2JZW2; A0A068TZR3; A0A067K2E7; W9QDF5; A0A2P6PSB2; A0A1S3TLX7; A0A…	A0A0J8C157 [224-237]	1	1614.83	14
FALSE	High	Selected	AIELIGTHLR	[KR].AIELIGTHLR.[K]					0.0487497	0	0.29	1	2	1	A0A0J8CIE0	A0A0J8CIE0; A0A0K9QSE5	A0A0J8CIE0 [313-322]	0	1122.66	10
FALSE	High	Unambiguous	TIFIGHGPQFAEGR	[R].TIFIGHGPQFAEGR.[K]					0.0209918	0	0.427	1	1	1	A0A0J8B2V7	A0A0J8B2V7	A0A0J8B2V7 [430-443]	0	1529.79	14
FALSE	High	Unambiguous	IFEGEALLRR	[R].IFEGEALLRR.[MI]					0.159759	0.00409645	0.097	1	255	3	A0A1Q3BYB2	A0A2G9HQ74; C5X364; M0RSK3; M0TP59; A0A068UHZ9; A0A0D6R2L4; A0A0D2UQT2; A0A0E0GGZ3; A0A0A0KSN1; A0A2H3Z4R5; A0A2H5N8R8; K3ZX51; A0A1J3E983; A0A0E0NPV1; A0A2K3M1W9; A0A0D9VUL1; I1IKJ4; A0A0D9XTW6; A0A0V0HBQ4; B8ANT6; V7C7Y9; A0A059ARY5; A0A1U8IQ86; G7KRA8; A0A1S3ZTI1; A0A2C9VPD9; A0A0V0HHA1; A0A1D1ZFQ5; A0A199VV73; A0A2R6P447; A0A1R3JAV8; A0A1U8HIZ5; C6T193; D7MJG9; A0A068VDD3; A0A0D2SQW5; A0A022Q…	A0A1Q3BYB2 [335-344]	1	1203.68	10
FALSE	High	Unambiguous	MAGFLSENRPVQTLR	[RK].MAGFLSENRPVQTLR.[SAEYG]					0.0736081	0.000962316	0.223	1	80	1	731358722	A0A067DE31; A0A1J7GY07; A0A1J7GYD3; I1P6B1; A0A2I0KC78; B9HM58; A0A287ICC8; J3LXA1; M1CNJ1; M0TLV9; A0A1J7H347; A0A0E0KPV2; B9HTM3; A0A2I0K0K8; A0A199UV10; A0A0P0WA25; V7B462; A0A0D3FV60; A0A1R3GLJ2; A0A2H5QIG2; K4BPJ0; A0A287IC75; A0A2P5SMF7; A0A0D2RZ71; M7Z527; A0A2K3MV64; G7KVS0; A0A0D9ZK09; A0A218XD83; Q01LD8; A0A0D2TK02; S8D574; A0A1R3JPX9; K7MVB9; A0A200R6E7; A0A2I0B253; A0A2G9GV05; W1PQ54;…	731358722 [181-195]	0	1718.9	15
FALSE	High	Unambiguous	NHGPIPVVDDIER	[R].NHGPIPVVDDIER.[YM]					0.0168227	0	0.463	1	36	1	A0A0D2RQ75	D1G528; A0A2P5CJX4; A0A0D2NLP0; B9RBI9; H8XZ69; V9TH79; A0A1R3IRY5; A0A1S3YYI0; A0A0D2SRX9; A0A1U7X1B1; A0A2C9UGP9; A0A1J6J868; K4BDK7; M0TW35; A0A0D2Q316; A0A0D2RWX3; A0A2P5QPH9; A0A2G2XI69; A0A1U8I343; A0A251SK40; A0A061EDU6; A0A2K2C7G6; 731338060; B9GJT3; A0A2P5FC65; M1BSR3; A0A1R3JDL8; A5H1Q7; Q2V993; A0A2K2C7G2; Q2WFI1; A0A2G3ACR2; A0A1S4AFJ8; A0A0D2RQ75; A0A2K2C7H3; A0A2G3DA90	A0A0D2RQ75 [52-64]	0	1460.75	13
FALSE	High	Unambiguous	YGTWMTTMHVVPMGQR	[R].YGTWMTTMHVVPMGQR.[K]					0.0230205	0	0.412	1	2	1	Q4H1G6	731342011; Q4H1G6	Q4H1G6 [356-371]	0	1894.88	16
FALSE	High	Unambiguous	VAESLGHTVLGWR	[K].VAESLGHTVLGWR.[SLHTRAQ]					0.0343342	0	0.347	1	42	1	731321657	A0A2P6SNZ7; A0A199W0F5; Q93WZ7; V7CX76; A0A2N9J8R7; A0A2J6L1G8; A0A0S3RN10; B9RII5; D8R2R8; A0A251QP81; A0A161YGV4; A0A067JE60; A0A0R0EV06; A0A103YDH4; A0A2K3PCD9; A0A2H5NZE9; A0A068U993; A0A0L9V045; A0A0R0EVI7; V4S9A8; A0A1S3UEE6; A0A2C9UJ07; A0A251SCH7; A0A218X5I7; A0A1Q3BDX7; D8STB8; A0A0K9QQ02; A0A022Q930; A0A251TVE9; A0A0R0EJ07; A0A067E773; A0A0R0EJU2; A0A2C9VR74; D8STB7; A0A2R6Q972; A0A1S3U…	731321657 [208-220]	0	1424.76	13
FALSE	High	Unambiguous	SYGNVPQPHAILYYSQR	[R].SYGNVPQPHAILYYSQR.[TA]					0.00289736	0	0.749	1	75	2	A0A2K3MVZ0	A0A2P4IDZ5; A0A161WVN5; A0A068VE68; A0A2K3MVZ0; A0A2J6M5T1; A0A1J3GD99; A0A2J6M5K8; A0A2G2VUE0; A0A2H3XD13; A0A1U7W6A1; A0A068UQR7; A0A286N7Q6; A0A0K9R8L6; A0A2G2YM41; A0A1J6IZX2; A0A1S3ZQ12; G7K3S4; A0A2P4LRN1; A0A1J3CBX5; A0A199UH16; A0A2P4L3M9; A0A1U8F7Y2; A0A1D1YS66; A0A142KXI7; V9TLJ9; M5XGD8; A0A0K9R8R8; A0A2K3L834; A0A0S3T0V2; I3SBD7; A0A1D1XZW4; A0A2P6PFD4; A0A2P4LRM8; A0A0K9RAS5; 7313139…	A0A2K3MVZ0 [37-53]	0	1992.99	17
FALSE	High	Unambiguous	IMNLHAPEWSGEVR	[R].IMNLHAPEWSGEVR.[SNRGD]					0.00751625	0	0.594	1	40	1	A5C7M6	A0A078IIM0; A0A1D1XVT9; A0A2J6MG08; A0A118JSH2; A0A1R3G076; V4JS41; A0A067KKQ6; 731312962; A0A1Q3BVV7; A0A087HHG0; B9R8Y4; A0A2R6Q1C9; A0A022Q629; A0A251TY13; A0A0V0HCD2; A0A2H5MZL0; M5VXU8; A0A059BYH5; A0A061FJ35; A0A2P5R5F6; K4CHZ8; A0A0D3CXC8; A0A2I4FHK5; M4CI97; A0A067EJH8; A0A1J3HIG1; A0A2K1WQS6; A0A2P6PKA5; A5C7M6; A0A1R3I4V8; A0A067D760; A0A2P5YQC7; A0A2G9G9S6; D7SMV8; M0ZKY7; W1NWU5; A0A1…	A5C7M6 [103-116]	0	1638.81	14
FALSE	High	Unambiguous	LQAAISHLDQQIR	[R].LQAAISHLDQQIR.[ML]					0.0217809	0	0.421	1	3	1	A0A0K9RGP3	731318152; A0A0K9RGP3; 731318154	A0A0K9RGP3 [52-64]	0	1492.82	13
FALSE	High	Unambiguous	YSSHLQNQTPPPSSTSNPYDPGR	[R].YSSHLQNQTPPPSSTSNPYDPGR.[T]					0.00232193	0	0.785	1	1	1	731348513	731348513	731348513 [436-458]	0	2530.16	23
FALSE	High	Unambiguous	LSNYNVLTGQQGEIRR	[R].LSNYNVLTGQQGEIRR.[N]					0.0257153	0	0.394	1	1	2	731323149	731323149	731323149 [313-328]	1	1847.97	16
FALSE	High	Rejected	TLVAASHPEFSTMR	[K].TLVAASHPEFSTMR.[Q]					0.125689	0.00257247	0.136	0	5	1		A0A072V9W4; G7IR70; A0A072VBM8; A0A072VAK8; G7IR69		0	1546.77	14
FALSE	High	Unambiguous	VALRPNMDESGIVGR	[K].VALRPNMDESGIVGR.[G]					0.00598654	0	0.631	1	1	1	731311373	731311373	731311373 [405-419]	0	1613.84	15
FALSE	High	Unambiguous	IPPTEEIADRIR	[R].IPPTEEIADRIR.[K]					0.0240332	0	0.405	1	4	2	1108923008	1108923008; Q4H1G2; P93263; C1KEU0	1108923008 [714-725]	1	1409.77	12
FALSE	High	Unambiguous	ASSVVISGTDIVRPR	[R].ASSVVISGTDIVRPR.[G]					0.00437479	0	0.682	1	24	1	731350872	A0A0R0I1W6; V4TRD7; A0A0S3S3W3; A0A067GIE6; A0A067GIE2; A0A151T6L1; A0A067GFN2; A0A067GFN6; A0A067GSY0; I1KZY9; A0A067GSL3; A0A0L9VE27; I1MFN0; 731350872; A0A1S3VKY2; A0A0R0I1V0; A0A067GFE7; A0A0C9SA76; A0A0K9QNF8; A0A2H5N523; V4UAR4; C6TGR8; A0A067GSY5; C6THZ4	731350872 [167-181]	0	1556.88	15
FALSE	High	Unambiguous	FYPQFGSGSSDVVRR	[R].FYPQFGSGSSDVVRR.[E]					0.00860522	0	0.572	1	2	2	731352263	Q9XFW7; 731352263	731352263 [104-118]	1	1701.83	15
FALSE	High	Unambiguous	SSLLHSSSGVNGVAEDIGR	[K].SSLLHSSSGVNGVAEDIGR.[Q]					0.000176489	0	1.204	1	1	1	731339204	731339204	731339204 [434-452]	0	1884.94	19
FALSE	High	Unambiguous	QLDGAHVEFLR	[R].QLDGAHVEFLR.[G-]					0.0219153	0	0.42	2	251	1	M5XCR9; A0A059BL19	A0A2P5XC84; A0A0P0VY65; T2DMJ6; A0A0A0L679; A0A1U7XV16; J3LPE0; A0A0D9XMJ5; A0A0L9UZF5; A0A0A9JHN1; A0A0D2S988; A0A2J6M612; A0A1D5TN87; A0A078G7H9; A0A2K2ACZ0; A0A0D6QVS2; A0A1S2Z6X5; A0A067XH53; A0A199W9Y1; K4D5G8; A0A199VM73; A0A0E0QBF6; A0A1D5RWZ2; O24052; F6H0X2; A0A1D5SW06; A0A2P5R414; B9RJN2; R0IS21; V7BTN3; A0A2J6LK70; A0A2K2AHK6; A0A0D9X1M3; A0A2K1ZRV4; C5WXQ3; H9C956; R0GVU2; A0A2R6QYG0;…	M5XCR9 [419-429]; A0A059BL19 [362-372]	0	1284.67	11
FALSE	High	Unambiguous	VGLTFTPETYHGR	[R].VGLTFTPETYHGR.[D]					0.0425805	0	0.312	1	1	1	731311927	731311927	731311927 [118-130]	0	1477.74	13
FALSE	High	Unambiguous	YHLPGETEEDFATR	[R].YHLPGETEEDFATR.[L]					0.0149675	0	0.482	1	14	2	731338116	A0A1D6DZL4; G5DX80; 731338116; A0A1D6DZK5; A0A1D6DZK6; A0A1D6DZK7; A0A2G5D2K6; A0A1D6DZK9; A0A1D6DZL7; A0A1D6DZL5; A0A1D6DZL0; A0A1D6DZK8; A0A1D6DZL3; A0A2G5D2K0	731338116 [230-243]	0	1664.76	14
FALSE	High	Unambiguous	FADFGVLHR	[R].FADFGVLHR.[N]					0.185169	0.00627731	0.073	1	22	1	A0A2N9GPI6	A0A2K1YRI8; A0A0L9USY8; A0A1S3VYW3; A0A1S2XK38; A0A0K9RXP8; A0A1S3EF61; A0A2K3NPS7; A0A0B2PRR8; A0A1S3VYK1; A0A2I0W1X8; I1J5B4; V7CJK2; G7K2Q8; A0A1S3EDX8; A0A151TGM6; I1JC08; A0A1S3EGG8; A0A0S3T3W6; 731354570; A0A0K9RIZ7; A0A1S3EGI2; A0A2N9GPI6	A0A2N9GPI6 [409-417]	0	1061.55	9
FALSE	High	Unambiguous	IERPTYTNLNR	[K].IERPTYTNLNR.[L]					0.0544564	0.00054243	0.272	1	1	1	A0A164Y0E4	A0A164Y0E4	A0A164Y0E4 [217-227]	0	1376.73	11
FALSE	High	Unambiguous	YEERPVAAGTLNVAQLR	[R].YEERPVAAGTLNVAQLR.[H]					0.0255577	0	0.395	1	2	1	731373717	1108864229; 731373717	731373717 [118-134]	0	1887.01	17
FALSE	High	Unambiguous	LHPLTGPDMEELQAR	[R].LHPLTGPDMEELQAR.[I]					0.0305477	0	0.366	1	1	1	731323601	731323601	731323601 [269-283]	0	1706.85	15
FALSE	High	Unambiguous	TRYDDVDLVTIR	[K].TRYDDVDLVTIR.[E]					0.0252452	0	0.397	1	7	1	731345750	A0A087H8C0; A0A087SBZ2; A0A068UEZ5; A0A2I0W5B7; 731345750; A0A200R6C8; A0A164WHT8	731345750 [132-143]	1	1465.76	12
FALSE	High	Unambiguous	IVNSAENLGEVLRGDR	[K].IVNSAENLGEVLRGDR.[I]					0.121136	0.00257247	0.142	1	28	1	A0A2G3D0M5	A0A2G2XXI0; V4SLP2; A0A1S2YV16; A0A2P5X2L3; A0A2G2V8X1; A0A0D2UNG9; A0A061GD83; A0A2I0K185; A0A061GCG0; A0A0B0PKV4; A0A0K9Q7B0; V4SRN3; A0A199VZ74; A0A2H3Z4V5; A0A1U8IPN8; A0A067FQ20; A0A0J8B6M8; A0A1D1Z8J4; A0A1U8G3L1; A0A2H5NEF0; A0A2P4N1X0; A0A2H3Z530; A0A072TLT0; A0A2G3D0M5; A0A218WXL0; 731375143; A0A1U8KFD8; A0A061GB46	A0A2G3D0M5 [468-483]	1	1741.92	16
FALSE	High	Unambiguous	TAFSRPENLTDAISR	[R].TAFSRPENLTDAISR.[I]					0.00799302	0	0.584	1	1	1	731362489	731362489	731362489 [51-65]	0	1677.86	15
FALSE	High	Unambiguous	LLDHPAFDIR	[KR].LLDHPAFDIR.[N]					0.168851	0.00563879	0.088	1	36	2	V4JUI4	A0A0K9R9H0; D7KTD6; A0A178W6H1; F4I3R4; A0A1J3CAH5; A0A178W810; 731331070; A9TE03; 731331066; V4JUI4; A0A1S3URZ2; A0A1J3JAD7; A0A0D3BW05; A0A067G9J7; 731355203; A0A2H5NG26; A0A0S3QXI1; B3H621; C4WRH6; F4I3R0; A0A2K1JBF2; M4DSE0; R0HXB5; A0A1J3I5D3; A0A1J3FWQ3; A0A0K9Q9L6; A0A0K9R9F3; V4THD7; D0R6J8; A0A2H5NG30; Q8H0S9; A0A1S3US18; A0A1S3USH5; A0A0L9VPX6; A0A1S3US13; F4I3R1	V4JUI4 [894-903]	0	1196.64	10
FALSE	High	Rejected	VIFDTAPTGHTLR	[R].VIFDTAPTGHTLR.[L]					0.017136	0	0.46	0	1	1		A0A2H3XHX9		0	1427.76	13
FALSE	High	Unambiguous	LTELNESRTELLSR	[K].LTELNESRTELLSR.[I]					0.0924168	0.00187066	0.186	1	1	2	A0A0J8B7E7	A0A0J8B7E7	A0A0J8B7E7 [25-38]	1	1660.89	14
FALSE	High	Unambiguous	ELVALSGSHTVGQAR	[R].ELVALSGSHTVGQAR.[C]					0.000928702	0	0.934	1	1	1	731344680	731344680	731344680 [190-204]	0	1524.81	15
FALSE	High	Unambiguous	ISQITDELQHTR	[K].ISQITDELQHTR.[A]					0.0169265	0	0.462	1	1	1	1108919082	1108919082	1108919082 [489-500]	0	1440.74	12
FALSE	High	Unambiguous	YIGSMVADVHR	[R].YIGSMVADVHR.[T]					0.0444536	0	0.305	1	230	1	A0A1D5RTY2	A9NRG3; A0A1E5WNC3; C1EHJ6; A0A068JD95; Q0JHF8; C6TM26; A0A0D3G849; C6T8Y3; A7J2C3; A0A251UTI8; A0A0B2S3H8; A0A287LZV7; B9EUU5; A0A0L9VK46; D7SRB4; G7IL84; A0A1S3V8U5; A0A1R3HLE7; P46276; A0A0Q3G6I7; A0A0A9P719; A0A0D9ZZR4; A0A0E0JRG3; A0A1D6FPK9; A0A0V0HUX0; A0A1D5SPI7; A0A1U8GDS4; A0A287G8P9; A0A0E0DRX8; A0A2P5YN32; V7C671; V4T3G2; A0A0D2VZY0; A0A2R6R2L4; I1LDG8; A0A0D9ZZR7; A4S232; K3Z7Q3; A0A…	A0A1D5RTY2 [398-408]	0	1247.62	11
FALSE	High	Unambiguous	IDHSLPLPR	[R].IDHSLPLPR.[V]					0.0982789	0.00187066	0.176	1	1	1	731350936	731350936	731350936 [35-43]	0	1047.59	9
FALSE	High	Unambiguous	VVDSMVGNLRPTR	[R].VVDSMVGNLRPTR.[A]					0.182906	0.00627731	0.075	1	2	1	731324490	731324490; A0A0K9S481	731324490 [315-327]	0	1443.77	13
FALSE	High	Unambiguous	YGSGYGGR	[K].YGSGYGGR.[S]					0.167816	0.00563879	0.089	1	2	1	B8LPB6	A9NSJ4; B8LPB6	B8LPB6 [169-176]	0	816.363	8
FALSE	High	Selected	IVFDTAPTGHTLR	[R].IVFDTAPTGHTLR.[L]					0.0162133	0	0.469	1	200	1	A0A2P5X4P0	A0A0V0ICD7; A0A1S4CJ63; M4EM12; A0A1D2A4A3; B9SY64; M1AE78; A0A200R5Q6; W9S2I5; A0A1R3HAK3; F6GU28; A4S2F3; A0A2K3DT83; I0YX28; A0A067LHD2; A0A0D3FAF2; V4SG33; A0A1D6B9K7; J3LH15; A0A166DGR3; A0A1U7XLU8; A0A1U7ZL42; A0A2I4GLR1; A0A1J3EKB4; R0EWE9; I1IFB4; A0A078IXP1; A0A287E422; A0A0D2TY77; G7I505; A0A087H8G3; A0A2I4GLQ3; A0A151SE77; A0A072VPD0; A0A0S3SNU4; A0A0D2SBJ4; A0A1J3H3D6; Q5XF80; A0A0D3C…	A0A2P5X4P0 [274-286]	0	1427.76	13
FALSE	High	Unambiguous	TVIAASHPEFSTMR	[K].TVIAASHPEFSTMR.[Q]					0.00507061	0	0.658	1	10	2	A0A0J8BEJ3	A0A0J8BEJ3; A0A0J8BAI6; A0A218XUQ5; A0A0J8BE90; G5DX98; A0A0J8BBU0; 731365313; A0A0K9RK50; A0A0K9RI97; A0A2I0KAV2	A0A0J8BEJ3 [395-408]	0	1546.77	14
FALSE	High	Unambiguous	SGTNMMNAPSPQQQTLQQQHQLQQQR	[R].SGTNMMNAPSPQQQTLQQQHQLQQQR.[K]					0.0012173	0	0.89	1	1	1	731365383	731365383	731365383 [312-337]	0	3007.42	26
FALSE	High	Unambiguous	IDLTSHIVR	[RK-].IDLTSHIVR.[VI]					0.204317	0.00685958	0.057	1	10	1	A0A0C9RHF8	A0A2H3XP36; 731314491; A0A1D1ZGL5; A0A0D6R1Y4; A0A0K9QMN3; A0A0C9RHF8; A0A199URA3; A0A199W7B0; A0A2I0VVX3; A0A199VB06	A0A0C9RHF8 [69-77]	0	1053.61	9
FALSE	High	Unambiguous	EMVALAGAHTIGQAR	[K].EMVALAGAHTIGQAR.[C]					0.0202314	0	0.433	1	6	2	731349376	1108958980; Q8VWP7; A9NZA1; A0A0K9RGN8; 731349378; 731349376	731349376 [232-246]	0	1524.8	15
FALSE	High	Unambiguous	SLAQLEEANREVEER	[K].SLAQLEEANREVEER.[K]					0.224062	0.00972005	0.042	1	3	1	731329400	1108913046; A0A0J8CHP4; 731329400	731329400 [675-689]	1	1772.88	15
FALSE	High	Unambiguous	IIRPGITTDEIDR	[R].IIRPGITTDEIDR.[V]					0.144787	0.00292848	0.113	1	3	1	731361161	A0A0K9Q7X0; W9RGT5; 731361161	731361161 [168-180]	0	1498.82	13
FALSE	High	Unambiguous	VLTANPAYWDSHGAR	[R].VLTANPAYWDSHGAR.[V]					0.201819	0.00652397	0.059	1	1	1	731321531	731321531	731321531 [354-368]	0	1657.81	15
FALSE	High	Unambiguous	SSELPRPNQTVLEAQGR	[R].SSELPRPNQTVLEAQGR.[V]					0.00724395	0	0.6	1	2	1	731342498	731342500; 731342498	731342498 [81-97]	0	1881.98	17
FALSE	High	Unambiguous	AMSNLESSPEGFNMLRR	[R].AMSNLESSPEGFNMLRR.[ML]					0.0600875	0.00054243	0.256	1	252	2	731357482	A0A287PV48; A0A1S3USE2; A0A1J6IMY0; A0A1U7VXI7; M0ZMN9; I1HA43; A0A199UL45; A0A1R3JB06; A0A2K2AEI6; A0A1U8ML38; A0A1D5YMQ7; A0A1S3EI31; K4A9V5; A0A2G5EM44; A0A0L9TNI4; A0A0S3R3T1; A0A1U8LXW5; A0A1D5XZK2; A0A0V0IN04; M0SXJ0; A0A0R0G040; A0A1S4AGQ3; A0A2P2LGE0; V7CFV3; C5WZW0; A0A2I4FBY4; A0A2P2LGC7; A0A067L974; A0A103XSK3; A0A2I4GCD1; A0A0E0MAA1; A0A2I0WPU9; S8DVM4; A0A1Q3CSA3; A0A2K3NV77; A0A165A…	731357482 [246-262]	1	1938.92	17
FALSE	High	Unambiguous	LSHVYTAILEPNSDLR	[K].LSHVYTAILEPNSDLR.[I]					0.0157223	0	0.474	1	1	1	A0A2I0AID0	A0A2I0AID0	A0A2I0AID0 [151-166]	0	1827.96	16
FALSE	High	Unambiguous	EHTFIFEDSPSGIR	[K].EHTFIFEDSPSGIR.[A]					0.0528073	0	0.277	1	3	2	731367585	731367585; A0A0K9RSD2; 731367587	731367585 [186-199]	0	1634.78	14
FALSE	High	Unambiguous	LASRLDAVVSR	[RK].LASRLDAVVSR.[L]					0.181784	0.00627731	0.076	1	16	2	731315662	A9RGJ4; A0A087SAS4; A0A1D1ZYW6; I0YMX0; M0X6B2; A0A200QLK2; A9NMS6; A0A1U8ACS3; A0A2I0XC44; A0A0D6R9M8; A0A0C9RNY4; U5D4X4; B0BKB0; A0A150H5P7; 731315662; A0A0D2K8L9	731315662 [133-143]	1	1186.69	11
FALSE	High	Unambiguous	TSNTRVESFTNVEPTNR	[R].TSNTRVESFTNVEPTNR.[A]					0.00178237	0	0.828	1	1	2	731318950	731318950	731318950 [208-224]	1	1951.95	17
FALSE	High	Unambiguous	NPVREEYLDGSVAR	[R].NPVREEYLDGSVAR.[S]					0.0142489	0	0.49	1	2	2	731335508	731335508; 731335510	731335508 [279-292]	1	1604.8	14
FALSE	High	Unambiguous	TVMNETERYESLR	[K].TVMNETERYESLR.[H]					0.0635071	0.000962316	0.247	1	1	2	731338126	731338126	731338126 [69-81]	1	1627.77	13
FALSE	High	Unambiguous	IAGYRAPEVVETR	[R].IAGYRAPEVVETR.[K]					0.0213828	0	0.424	1	5	1	731353533	A0A2G5FBT8; A0A1S3CIZ4; 731353533; A0A0K9R3E9; A0A0A0LX04	731353533 [521-533]	1	1460.79	13
FALSE	High	Unambiguous	LAFDEVTGRR	[R].LAFDEVTGRR.[Y]					0.11391	0.00257247	0.152	1	1	1	1108946659	1108946659	1108946659 [64-73]	1	1163.62	10
FALSE	High	Unambiguous	LIGRQYSDPELQR	[R].LIGRQYSDPELQR.[D]					0.0635071	0.000962316	0.247	1	1	1	731359455	731359455	731359455 [70-82]	1	1574.83	13
FALSE	High	Unambiguous	AFDLGGHQIAR	[KR].AFDLGGHQIAR.[RLW]					0.018223	0	0.45	1	253	1	M4EPP3	A0A087GLM2; A0A2P5WRW4; V4LMW8; A0A1U8N9C0; W5FLE9; J3NE49; Q40463; B9HWX5; A0A1U8JYN1; Q307Y7; A0A2G9GMX8; J3KYD4; D8QY86; A0A1S2YQ34; A0A2P5CLM9; Q01474; A0A2G5CD28; A0A2R6RD58; A0A0S3R8N2; A0A2H3XN06; A0A1S4BB77; A0A1J6J822; A0A059DCL9; A0A2I4DE31; A0A2G9H5R6; A0A2R6P484; U5G9I9; A0A059DB40; A0A2H3XAU7; A0A059A7N4; M0TN49; A0A1R3GK25; V4MWG0; O04834; B6TG58; B9I706; A0A2I4GQI4; A0A1U8AQC7; M4E…	M4EPP3 [535-545]	0	1184.62	11
FALSE	High	Unambiguous	IAQHAPAYSVNDEFSR	[K].IAQHAPAYSVNDEFSR.[V]					0.0141615	0	0.491	1	1	1	731348261	731348261	731348261 [94-109]	0	1804.86	16
FALSE	High	Unambiguous	IIPYLGASHDR	[R].IIPYLGASHDR.[L]					0.0547923	0.00054243	0.271	1	2	1	731364894	731364894; A0A0K9QZZ3	731364894 [352-362]	0	1241.66	11
FALSE	High	Unambiguous	LVEEQLLHER	[R].LVEEQLLHER.[-E]					0.0958907	0.00187066	0.18	1	4	1	731326606	A0A0K9QF21; A0A0K9QAN1; 731326606; A0A0K9RIK9	731326606 [708-717]	0	1265.68	10
FALSE	High	Unambiguous	SQREQDSMFAISGDR	[R].SQREQDSMFAISGDR.[N]					0.0172417	0	0.459	1	2	1	731318256	731318258; 731318256	731318256 [282-296]	1	1726.78	15
FALSE	High	Unambiguous	MASQPMNNARPPTVQIR	[R].MASQPMNNARPPTVQIR.[G]					0.195707	0.00652397	0.064	1	14	1	M5XLT0	A0A251QMC8; 731360831; A0A2P5FJF2; A0A2P6P8T5; A0A2I4E864; A0A2N9G4I7; A0A2I4F0I3; M5WBY4; A0A0K9R4B0; A0A251QQJ0; A0A2P5CU70; M5XLT0; W9RPK9; A0A1J7FZA8	M5XLT0 [247-263]	0	1910.97	17
FALSE	High	Unambiguous	SSSSNSGEQIDLWNNRNPR	[K].SSSSNSGEQIDLWNNRNPR.[I]					0.00491706	0	0.663	1	1	1	1108879562	1108879562	1108879562 [41-59]	1	2161	19
FALSE	High	Unambiguous	VAAVQNNLSLSPRPGTSAR	[K].VAAVQNNLSLSPRPGTSAR.[R]					0.109111	0.00224036	0.159	1	1	1	731343211	731343211	731343211 [494-512]	0	1938.05	19
FALSE	High	Unambiguous	VAGYRAPEITDAR	[R].VAGYRAPEITDAR.[K]					0.0982789	0.00187066	0.176	1	1	1	731319183	731319183	731319183 [525-537]	1	1418.74	13
FALSE	High	Unambiguous	YHGDTDIQLER	[RK].YHGDTDIQLER.[VI]					0.0164139	0	0.467	1	6	4	731348756	A0A2G3CBM7; B9RC96; A0A2I4FAP7; 731348756; A0A2I0X8V8; A0A218WGR5	731348756 [36-46]	0	1346.63	11
FALSE	High	Unambiguous	FFTETEENNQMRGPR	[K].FFTETEENNQMRGPR.[TSNM]					0.0278557	0	0.381	1	123	1	A0A1R3HP78	A0A067GBG4; A0A1U8LRF4; A0A0D3BMF2; A0A067GNK4; A0A2P5VW10; A0A251RZ51; A0A2R6PTV3; B9RGI8; A0A0D9YDG7; A0A0V0IAY0; A0A0B2QU04; A0A0E0JMQ4; A0A067KW78; G7ICJ3; A0A0D9V4E2; A0A2H5P5C0; A0A2P4NCL1; A0A2H3ZZI0; B8A802; A0A2I0VUX9; A0A1R3GWA2; Q9LHE7; A0A2I4FXM2; A0A0R0IEQ9; M0U547; A0A1U7ZLE2; A0A2N9GEN8; A0A2I4FXC2; A0A0K9P5D2; A0A1J7GN03; B4FVS0; A0A078JU72; A0A0L9UTE0; M0U2B1; A0A2H5P575; I1NF26;…	A0A1R3HP78 [282-296]	1	1855.84	15
FALSE	High	Unambiguous	TSPGVISTYLHSSPQPGLGR	[K].TSPGVISTYLHSSPQPGLGR.[I]					0.0174551	0	0.457	1	1	1	731311599	731311599	731311599 [221-240]	0	2054.07	20
FALSE	High	Unambiguous	LATPAYIAVRDEFR	[R].LATPAYIAVRDEFR.[R]					0.141269	0.00292848	0.117	1	1	2	731319852	731319852	731319852 [323-336]	1	1621.87	14
FALSE	High	Unambiguous	NTVGLLERPVAEFPNAR	[R].NTVGLLERPVAEFPNAR.[E]					0.157806	0.00409645	0.099	1	1	1	731326163	731326163	731326163 [116-132]	0	1883.01	17
FALSE	High	Unambiguous	HETADIDTFSWGVANR	[K].HETADIDTFSWGVANR.[G]					0.0243306	0	0.403	1	1	1	731372394	731372394	731372394 [355-370]	0	1818.84	16
FALSE	High	Unambiguous	QGIVLLQNRPGSLPLSTAR	[R].QGIVLLQNRPGSLPLSTAR.[H]					0.0138174	0	0.495	1	1	1	731322022	731322022	731322022 [391-409]	0	2020.17	19
FALSE	High	Unambiguous	AIGRPLMAKVKQTTGIVGLDVVPNAR	[R].AIGRPLMAKVKQTTGIVGLDVVPNAR.[E]					0.101348	0.00224036	0.171	1	2	1	M5XKY7	A0A059DJN4; M5XKY7	M5XKY7 [5-30]	2	2704.57	26
FALSE	High	Unambiguous	HAVDPLSDFSQLER	[R].HAVDPLSDFSQLER.[N]					0.00138512	0	0.869	1	2	1	A0A0K9QUT0	A0A0K9QUT0; 731336543	A0A0K9QUT0 [258-271]	0	1613.79	14
FALSE	High	Unambiguous	TAPIPAPLLHVPTAVR	[K].TAPIPAPLLHVPTAVR.[S]					0.0141615	0	0.491	1	1	1	731339990	731339990	731339990 [187-202]	0	1652.98	16
FALSE	High	Unambiguous	SGLSSSNIDWLLLHQANQR	[K].SGLSSSNIDWLLLHQANQR.[I]					0.00719954	0	0.601	1	1	1	731330508	731330508	731330508 [318-336]	0	2139.09	19
FALSE	High	Unambiguous	NFDVGYVPLRLPR	[K].NFDVGYVPLRLPR.[A]					0.0481537	0	0.292	1	2	2	731364732	731364732; A0A0J8BF48	731364732 [347-359]	1	1545.85	13
FALSE	High	Unambiguous	HEYLTDDLQAMQTPFR	[K].HEYLTDDLQAMQTPFR.[S]					0.00209143	0	0.802	1	1	1	731320240	731320240	731320240 [82-97]	0	1964.92	16
FALSE	High	Unambiguous	QEGLSFVGLHIPVGR	[K].QEGLSFVGLHIPVGR.[IVL]					0.0240332	0	0.405	1	11	2	731329402	A0A2P6PMD1; A0A0A0L6H3; A0A022RCA1; A0A103YKI7; A0A1S3C365; T1RUX3; G9I583; 731329402; A0A251TXN9; A3RG98; A0A2J6JKN6	731329402 [400-414]	0	1608.89	15
FALSE	High	Unambiguous	NGIPLTTAATANFTRGELATALR	[R].NGIPLTTAATANFTRGELATALR.[K]					0.00569913	0	0.639	1	9	3	731367225	A0A0V0HGS9; A0A200QYG4; K4CVK9; A0A022RRC9; 731367225; A0A2G5DN85; W1P1S2; A0A175YQF8; M1D5K4	731367225 [71-93]	1	2359.27	23
FALSE	High	Unambiguous	LLVPGKVSEDDKLIEYDALLLDR	[R].LLVPGKVSEDDKLIEYDALLLDR.[F]					0.0976764	0.00187066	0.177	1	20	1	A0A2P5A903	Q9SWG7; A0A0C9QQ35; A0A022QIH5; A0A2G5DFA3; A0A2G5DFD7; A0A2G5CSC2; A0A0D6QR94; A0A2P5A903; B9I1U5; A0A2P5FKW7; P51063; A0A2G5CS13; A0A0C9S485; B8LNW6; A0A2I4ET10; A0A2K1YIK9; W9RZ79; A0A0D6QUG5; A0A2I4FLI0; A0A0C9S6Z0	A0A2P5A903 [18-40]	2	2614.43	23
FALSE	High	Unambiguous	NQGEGEITEHQLQR	[K].NQGEGEITEHQLQR.[N]					0.0731568	0.000962316	0.224	1	1	1	731359656	731359656	731359656 [4-17]	0	1638.78	14
FALSE	High	Unambiguous	YIGLSEASASTIRR	[KR].YIGLSEASASTIRR.[AI]					0.0241815	0	0.404	1	252	2	A0A0E0KP46	A0A059AW90; C5X7X3; A0A0A1HAW3; A0A0L9U1S8; A0A2P5W1S9; A2XRZ0; A0A0C9RSV4; A0A0E0P7I5; A0A1D5T9N9; A0A059AVM6; D7U9M0; A0A067EKT3; A0A1U7XQT3; A0A0D3FUB0; A0A078H9H4; A0A2H5PHJ2; A0A068UP48; A0A0E0DCM1; A0A1S3DZI5; A0A2I0IUC1; A0A1U7XD45; A0A2N9H598; A0A151TCR8; A0A287I9T5; A0A0D3E5A0; C5Z396; A0A068VH71; A0A2G5C715; E4MVL2; A0A2G9GVV2; A0A068VJS3; A0A2P5D0V1; A0A2J6MJ48; A0A1U8JB31; A9NPE7; V4K…	A0A0E0KP46 [722-735]	1	1523.82	14
FALSE	High	Unambiguous	SAQDIALVDLPPTHPIR	[K].SAQDIALVDLPPTHPIR.[L]					0.0383534	0	0.329	1	1	2	731312607	731312607	731312607 [163-179]	0	1843.01	17
FALSE	High	Unambiguous	GLTTEEIDEHLTAISERD	[R].GLTTEEIDEHLTAISERD.[-]					0.0658944	0.000962316	0.241	1	1	1	A0A0J8B475	A0A0J8B475	A0A0J8B475 [229-246]	1	2028.97	18
FALSE	High	Unambiguous	SGMRIGRIDVTPIPTDSTR	[R].SGMRIGRIDVTPIPTDSTR.[R]					0.0953028	0.00187066	0.181	1	1	1	A0A2K1YH76	A0A2K1YH76	A0A2K1YH76 [121-139]	2	2072.09	19
FALSE	High	Unambiguous	LATPAYIAVR	[R].LATPAYIAVR.[D]					0.0439102	0	0.307	1	1	2	731319852	731319852	731319852 [323-332]	0	1074.63	10
FALSE	High	Unambiguous	GGVIDEDALVR	[RK].GGVIDEDALVR.[A]					0.181784	0.00627731	0.076	2	196	1	731351924; 731360225	A0A1U8MMH1; A0A1J3ET47; A0A2H3XWG0; B9SG91; A0A0D3A229; A0A1D6RDA9; A0A087HPA7; I1KVS6; A0A1D6DHZ1; A0A164V9H7; A0A1U8EF31; A0A2P4KRH2; M8BUB8; A0A2R6QF55; V7B8L0; Q6ZAA5; A0A2K2C602; F2DUL4; K4BN81; Q0J5C2; A0A1U8AEH0; A0A151SGE6; M1AIT2; M7ZH26; K4D0E5; A0A2G2YK65; A0A1D6JG43; M0SIG5; A0A251TM90; B6SKK1; C0PLN9; A0A1J3IEA3; A0A1D6KNM8; A0A2N9H256; B9G167; A0A0P0WFS7; A0A1J3CRM4; C5YLQ3; A0A1D5U…	731351924 [311-321]; 731360225 [311-321]	0	1143.6	11
FALSE	High	Unambiguous	MGFLDVLTGSQGEIR	[K].MGFLDVLTGSQGEIR.[R]					0.0490504	0	0.289	1	1	1	A0A1S3CEJ9	A0A1S3CEJ9	A0A1S3CEJ9 [317-331]	0	1622.82	15
FALSE	High	Unambiguous	DFVLSIQRPR	[RK].DFVLSIQRPR.[S]					0.0575556	0.00054243	0.263	1	68	4	731332004	B9VWD5; D7KSU5; A0A078HMH2; A0A2P5B4W5; Q9SH69; A0A2P6P6F1; A0A178WJV9; A0A2P2LSR8; B9RCL8; A0A078I347; A0A2I4HBM1; V4VQ61; A0A1J3J2J2; A0A067GLV0; A0A067GM48; A0A151SV42; A0A2K3MWI7; A0A0L9VQM6; A0A2H5QI39; A0A1U7XJV6; V4KGI3; A0A067GCN7; A0A200QD81; A0A078GLU9; M4E9M4; A0A0R0K737; A0A0D3C0I3; W9S0V2; A0A2C9W9Y7; A0A1S3ZWY7; A0A178UQL8; A0A251P6U8; A0A1S3USC5; F6HUQ8; A0A2G5CAM9; I1KPH6; A0A1U8A…	731332004 [152-161]	0	1230.7	10
FALSE	High	Unambiguous	QSVLAAITSAQQR	[R].QSVLAAITSAQQR.[L]					0.0773202	0.000962316	0.215	1	99	1	A0A1R3JWP9	A0A2I4GHD9; B6ST15; C5YX98; M0UNX1; A0A061EL41; A0A0E0N7G4; I1PV22; A0A0D9ZC53; A0A068UB37; K3ZTE0; A0A0E0KHY1; I1HV29; A0A1D5SSR2; A0A0A9GB62; A0A0A9R6G1; A0A0D9VXY0; A0A0A9T2J7; M0T5P9; A0A0E0LMU0; M0W8S9; A0A1D5V7Z1; A0A2I0A3A1; A0A0E0CCT4; A0A0E0L1U6; A0A0E0EDS9; A0A0K9S297; A0A0E0JTG2; A0A087SIE9; A0A059LQJ9; A0A0E0DQT2; A0A1R3JTF0; A0A2H3ZCJ1; M7YEJ3; A0A067L0F2; A0A2P6TW32; A0A0A9CEY3; M8C…	A0A1R3JWP9 [1120-1132]	0	1372.75	13
FALSE	High	Unambiguous	DGDLLAAVAPHSAR	[R].DGDLLAAVAPHSAR.[H]					0.0541225	0.00054243	0.273	1	1	1	A0A0J8FG47	A0A0J8FG47	A0A0J8FG47 [17-30]	0	1392.72	14
FALSE	High	Unambiguous	SAIEASPVAIAGR	[R].SAIEASPVAIAGR.[E]					0.0469835	0	0.296	1	1	1	731368649	731368649	731368649 [344-356]	0	1241.68	13
FALSE	High	Unambiguous	TDFIAYAASPR	[K].TDFIAYAASPR.[S]					0.0472734	0	0.295	1	1	1	731346056	731346056	731346056 [257-267]	0	1211.61	11
FALSE	High	Unambiguous	VLNELDALPAR	[K].VLNELDALPAR.[AV]					0.113212	0.00257247	0.153	1	2	1	A0A0K9RDC5	731357953; A0A0K9RDC5	A0A0K9RDC5 [440-450]	0	1210.68	11
FALSE	High	Unambiguous	VNAFDGIEEGGIR	[R].VNAFDGIEEGGIR.[A]					0.0452814	0	0.302	1	1	1	731336362	731336362	731336362 [12-24]	0	1376.68	13
FALSE	High	Unambiguous	TDGIDLSGDRLALQR	[K].TDGIDLSGDRLALQR.[L]					0.0541225	0.00054243	0.273	1	1	6	731359783	731359783	731359783 [293-307]	1	1629.86	15
FALSE	High	Unambiguous	LYDPGYLNTAPVR	[K].LYDPGYLNTAPVR.[S]					0.0428432	0	0.311	1	134	3	731356945	A0A2G5C3U0; A0A200QJ25; Q0E2K1; A0A1J3CJ89; M0RI43; A0A0D3BPF0; A0A0D3DU87; A0A2H3Y729; A0A218WM51; Q9SJH7; I1JJ62; A0A151U253; A0A2P6S031; A0A2H5PHC5; A0A0E0JXQ9; A0A2I4F961; D8QQT3; A0A022QYH6; A0A1R3L7Q7; M4DDI6; D7LW71; A0A178VTY9; J3LB53; A0A199V476; K3YR77; A0A0D9VE32; A0A0D9YPP5; A0A078IH04; A0A0K9QRK2; A0A251SMI6; A5B7I4; A0A178VNV2; A0A2K3LWU2; A0A0K9Q3I9; A0A2H5PHE1; I1M6V7; D6R061; A0A…	731356945 [103-115]	0	1478.76	13
FALSE	High	Unambiguous	QLWLSSPVSGPSR	[RK].QLWLSSPVSGPSR.[FY]					0.0174551	0	0.457	1	54	4	K3XL73	A0A2P5E2B9; A0A058ZZ18; B6TSR5; K3XL73; A0A1U7ZXJ0; I1HSA9; A0A0E0N3D4; B9SZC1; A0A2P5CUD9; A0A2G5DQM5; A0A0D9YFV8; A0A0A9FKR4; G7KHU6; A0A1Z5RB02; A0A2K1Y613; S8CDU5; B4FP34; A0A2C9U2F1; A0A151TAC9; A0A1J7HLP1; A0A2P4H356; 731330597; A0A1S2XT75; A0A2H5PHY1; G7L2K8; 731330593; I1NS86; A0A0K9NXF9; A0A067LBL8; I1N8F6; G7KHT5; A0A0K9RXY8; B8AAG1; A0A2I4HP87; A0A2I0HMI1; D7SQR3; A0A199VXW4; A0A218X0R…	K3XL73 [204-216]	0	1413.75	13
FALSE	High	Unambiguous	VEPLVNMGQITR	[RK].VEPLVNMGQITR.[LVASYE]					0.222688	0.00972005	0.043	1	52	1	A0A2P2Q5C0	A0A2R6PBG3; A0A0B0NV37; A0A2P4MYZ1; S8CYE4; A0A0E0EXF5; A0A2P5YBT0; B9S3N5; J3N2F0; B9TNF3; A0A2K3MQQ5; A0A1U8K544; A0A0K9Q1W8; M0SSF0; K3XW50; A0A2P5REF2; A0A2P5WLQ4; Q8L5K5; A0A1E5VXJ2; A0A2I0WJM7; M5XQ54; A0A072UME9; A0A0E0BA51; A0A0D2TTU1; A0A251R7M2; A0A1Q3B2M3; A0A1S2YJJ3; K4A7W1; A0A194YLZ0; A0A061E8X9; A0A0E0M7D7; A0A096QRL6; A0A059Q183; B7FM04; A0A1U8K4X6; P93472; A0A194YN00; A0A2H3YTH1;…	A0A2P2Q5C0 [129-140]	0	1356.73	12
FALSE	High	Unambiguous	NSEMGITSTSLVPR	[R].NSEMGITSTSLVPR.[T]					0.144787	0.00292848	0.113	1	1	1	731353243	731353243	731353243 [236-249]	0	1491.75	14
FALSE	High	Unambiguous	YVELFPSTSEEAR	[R].YVELFPSTSEEAR.[R]					0.0958907	0.00187066	0.18	1	2	1	731337750	731337750; 731337752	731337750 [255-267]	0	1527.73	13
FALSE	High	Unambiguous	VIMSSPLSGDLR	[R].VIMSSPLSGDLR.[T]					0.112518	0.00257247	0.154	1	1	1	731337150	731337150	731337150 [28-39]	0	1274.68	12
FALSE	High	Unambiguous	LAVGAPLTEER	[R].LAVGAPLTEER.[H]					0.209405	0.00721273	0.053	1	19	1	F6HZR8	A0A1D1Z4B5; A0A1U7V3C6; A0A2P5C0P9; A0A1D1YG92; A0A1S4CAR3; A0A1S4CAS9; A0A1S4CAR6; A5BUW7; A0A1S4CAG5; F6HZR8; M5VIX4; A0A0K9RYU8; A0A2P5B6F9; A0A1U7VCS2; 731347039; A0A022S4V2; A0A251N1B0; A0A1U7V8L6; 731347037	F6HZR8 [472-482]	0	1155.64	11
FALSE	High	Rejected	AGALGDSVSITR	[K].AGALGDSVSITR.[DE]					0.125689	0.00257247	0.136	0	8	1		A0A0D3AXB0; V4MLB1; D7M5H6; Q0WRH6; A0A1J3HSL2; A0A1J3FRI1; A0A0D3DCH6; A0A1J3K9Y8		0	1146.61	12
FALSE	High	Unambiguous	SQFSTDNISTSTGR	[R].SQFSTDNISTSTGR.[S]					0.0078953	0	0.586	1	2	1	731312085	731312085; 731312093	731312085 [226-239]	0	1500.69	14
FALSE	High	Unambiguous	IAGLDVQR	[RK].IAGLDVQR.[I]					0.186312	0.00627731	0.072	1	184	1	731359783	A0A2P2M811; A0A061E037; A0A2J6LBK5; Q6Z7L1; A0A251UN61; A0A0L9VFS7; M0ZU24; A0A287LMP1; A0A287Q3V5; A0A1S2X9H9; V4SBF3; A0A022PSA9; 731343764; U5D6M8; W5CXB0; M8CPM1; A0A1J3K1R2; A0A2G2W937; A0A287LMN1; A0A1D5WEY7; I1KQV7; A0A1R3HTP9; A0A078IIB3; W5C1U0; A0A287Q347; F2D0D8; A0A0E0NNQ2; A0A2G3BV37; A0A2G5DN61; A0A2N9HHI1; A0A287Q3V0; O50047; A0A175YE45; A0A1S3UUU6; A0A0S3S277; A0A067FKP0; A0A287Q3…	731359783 [212-219]	0	871.5	8
FALSE	High	Unambiguous	SSGITSIAVR	[K].SSGITSIAVR.[G]					0.0705065	0.000962316	0.23	1	1	2	A0A0J8B475	A0A0J8B475	A0A0J8B475 [34-43]	0	990.558	10
FALSE	High	Unambiguous	NALPAADTNVDDAVSHR	[R].NALPAADTNVDDAVSHR.[T]					0.00174979	0	0.831	1	1	3	731335609	731335609	731335609 [867-883]	0	1765.85	17
FALSE	High	Unambiguous	IADQVGVPVGQQR	[K].IADQVGVPVGQQR.[L]					0.019142	0	0.442	1	3	2	1108865121	1108865121; A0A0J8B373; A0A0J8DX51	1108865121 [53-65]	0	1366.74	13
FALSE	High	Unambiguous	TPWNTSEDETEIR	[R].TPWNTSEDETEIR.[M]					0.0496575	0	0.287	1	1	1	731327225	731327225	731327225 [87-99]	0	1577.71	13
FALSE	High	Unambiguous	FLEGLSSR	[R].FLEGLSSR.[MLGV]					0.166787	0.00487918	0.09	1	145	4	A0A2N9EUG9	A0A199UD96; M5VGC3; S8DHC5; A0A0D3A788; A0A2J6MIY7; A0A1S3TD35; I1LS24; A0A2K1WS09; A0A1J3ITQ3; A0A2G2YJ50; M1BKD2; A0A078FPI8; A0A1S3C082; A0A1J7G591; A0A2P2K4Z7; B9IQU2; A0A2P5WRP9; A0A124SDE2; A0A2I4G2Z7; A0A0D2RIM8; A5ARD4; F4JL78; A0A0V0IMR0; A0A0K9QNC3; A0A2K1WS10; A0A1U8JVG8; A0A251Q350; A0A2P5ARX2; A0A2P5EQL7; A0A2G2VRP5; A0A2K1WSL8; A0A1J3G975; A0A2H5QIA6; E0CTD6; A0A2K3NSW2; A0A251NYI9;…	A0A2N9EUG9 [97-104]	0	908.484	8
FALSE	High	Unambiguous	SGGMSVSLASPDGR	[R].SGGMSVSLASPDGR.[VI]					0.19813	0.00652397	0.062	1	184	1	731331401	A0A0B0NBC5; A0A151SNL1; 731331401; A0A1R3JR75; A0A0B0NRV9; A0A2G5E346; A0A2H3XZU6; I1MUV7; A0A2I0WI44; A0A0V0I4I0; A0A0E0AQ75; A0A061GBU0; A0A067K159; A0A1D6PWW9; A0A2H3YH12; A0A1Q3BR94; A0A1U7YFV6; A0A2P5BHX5; F6HUL3; A0A151TBP4; A0A1J6IL34; A0A0S3SY95; A0A0D2R5A2; A0A1D1XN03; V7ANJ4; A0A1U8BHJ3; A0A1D6BLM3; A0A2P5C8M2; A0A059C1E4; A0A1U8GA24; A0A1J7G2C2; A0A2H3YUV3; M0V795; M5WUW0; J3MPW5; B9IC…	731331401 [219-232]	0	1320.62	14
FALSE	High	Unambiguous	TDGPVVGTFGR	[K].TDGPVVGTFGR.[S]					0.119655	0.00257247	0.144	1	1	1	731329850	731329850	731329850 [134-144]	0	1105.56	11
FALSE	High	Unambiguous	FDSSTSSSSSALSSDNHLIR	[R].FDSSTSSSSSALSSDNHLIR.[S]					0.000183124	0	1.198	1	1	4	731352582	731352582	731352582 [28-47]	0	2097.97	20
FALSE	High	Unambiguous	TGIAAPVAAPAPSAR	[R].TGIAAPVAAPAPSAR.[N]					0.0390676	0	0.326	1	1	1	731353890	731353890	731353890 [345-359]	0	1349.75	15
FALSE	High	Unambiguous	YDRDESSDSSDYVFDTSR	[K].YDRDESSDSSDYVFDTSR.[A]					0.0292605	0	0.373	1	1	1	731365708	731365708	731365708 [573-590]	1	2143.87	18
FALSE	High	Unambiguous	TGLIMVDR	[KR].TGLIMVDR.[VI]					0.162734	0.00409645	0.094	2	33	3	1108920788; A0A1D5SN50	A0A287EJ80; A0A0R0HPA5; I1HMB7; A0A1J7GMB1; A0A0R0GZH8; M8A3Z6; A0A0E0JRG4; A0A287EJA7; A0A287EJ91; Q711H9; A0A0D9WC08; C6T497; A0A0B0Q104; 731331965; R7W8H2; A0A287EJ82; A0A287EJC1; A0A1D5SN53; W5A872; I1L8L8; A0A0C4BIU7; M0VL77; A0A2P5XS26; I1HMB8; A0A1D5SN49; 1108920788; I1LYV4; I1LYV5; J3L664; A0A1D5SN50; C6SY00; A0A287EJ75; A0A0D9V869	1108920788 [90-97]; A0A1D5SN50 [74-81]	0	904.492	8
FALSE	High	Unambiguous	NSSMNSVGSGGIQQPTGNVPGGR	[R].NSSMNSVGSGGIQQPTGNVPGGR.[Y]					0.0863715	0.000962316	0.197	1	1	1	731321726	731321726	731321726 [18-40]	0	2201.04	23
FALSE	High	Unambiguous	AASNEGIALIAPDTSPR	[R].AASNEGIALIAPDTSPR.[G]					0.0292605	0	0.373	1	1	1	731324306	731324306	731324306 [73-89]	0	1682.87	17
FALSE	High	Unambiguous	AGEVFVFPR	[KR].AGEVFVFPR.[G]					0.0858419	0.000962316	0.198	2	4	2	731329309; 731368278	731329309; 731368278; K3Z9D1; A0A0K9RTR7	731329309 [143-151]; 731368278 [143-151]	0	1021.55	9
FALSE	High	Unambiguous	TFVNDIAIEPQR	[K].TFVNDIAIEPQR.[Y]					0.107777	0.00224036	0.161	1	1	1	731334945	731334945	731334945 [390-401]	0	1402.73	12
FALSE	High	Unambiguous	LITGTALQLLR	[K].LITGTALQLLR.[R]					0.0575556	0.00054243	0.263	1	4	1	731326131	G4XKY2; A0A0K9RAD9; 731326131; A0A251SSU7	731326131 [28-38]	0	1198.75	11
FALSE	High	Unambiguous	FLGNSLDVYPVGR	[K].FLGNSLDVYPVGR.[T]					0.0718194	0.000962316	0.227	1	61	2	A0A0A0LXE9	A0A1R3J8U8; A0A2C9WNY4; Q9LZM1; A0A178UIY2; A0A2P5VVZ2; A0A2P5APV1; A0A2H5P6F4; A0A061GXS5; A0A2P5QR69; A0A067E7J5; 731348931; A0A1P8BCB9; A0A067EIY0; A0A067E7W7; A0A1Q3CDL3; A0A068UKS3; A0A2I0IXH4; A0A1J3HNS8; A0A061GX49; A0A022PRN1; R0G8R1; Q9SR33; A0A1S3C5K1; A0A0D2TGR1; A0A078F4C0; A0A2H5P6E6; A0A067L4Y1; A0A1P8BCC1; A0A0D3CLQ4; D7L7T7; M4EZ21; A0A0B0P049; A0A1R3HBS2; A0A0D3BAE7; A0A1U8PHD8; …	A0A0A0LXE9 [197-209]	0	1436.75	13
FALSE	High	Unambiguous	WIGEPQTLLINGR	[RK].WIGEPQTLLINGR.[G]					0.112518	0.00257247	0.154	1	34	3	731355863	M5WEE0; A0A1J6KX47; P24792; A0A0D6E321; A0A199W3Q7; Q40588; A0A022S2M9; A0A0R0EHK2; Q8LJU3; V4W1A1; A0A1S3VFV0; A0A067FJR6; A0A151QXD6; A0A0S3S8E0; M1D5U8; F6HA36; A0A067FSD3; A0A0J8EGV0; X5JRX8; A0A1S3YXX8; A0A1S4D7M5; A0A072VA87; A0A0V0IIL1; I1NE62; A0A067FT54; P37064; A0A1J7G0P8; 731355863; K4D955; A0A0B2RVW0; A0A1U7V9I8; A5AGG0; A0A078BFK6; M0RM27	731355863 [198-210]	0	1496.82	13
FALSE	High	Unambiguous	SFAPLPLDAVTR	[R].SFAPLPLDAVTR.[AT]					0.0469835	0	0.296	1	2	1	A0A0K9RLC0	731336801; A0A0K9RLC0	A0A0K9RLC0 [102-113]	0	1286.71	12
FALSE	High	Unambiguous	VSDILFFDQR	[K].VSDILFFDQR.[R]					0.0608311	0.00054243	0.254	1	2	1	A0A0K9RG17	A0A0K9RG17; 731348866	A0A0K9RG17 [174-183]	0	1239.64	10
FALSE	High	Unambiguous	TSPQWLGPQLEVIR	[R].TSPQWLGPQLEVIR.[AHTFQSVYMCNL]					0.0123694	0	0.513	1	259	6	A0A2G9G138	A0A1D6AQ04; J3M7E0; A0A1D5T7I5; Q9SS45; W8PYF4; Q5DJ36; A0A1D6A710; A0A1D6AQ03; V5KWZ6; A0A1U8NKA0; I7HB62; A0A087GXH4; A0A1B0YYB1; Q8H6V6; M1BPH2; P35513; P45729; A0A1D5U4P1; A0A0E0NI15; A0A0E0G9Y8; A8R7D3; W5A9M7; A0A287UBJ2; A0A1D6AQ02; A0A1U7ZDI2; C5XXT9; A0A2G9FZG8; O64963; A0A1U7VY30; Q4PJW0; W4ZUS2; P35511; A0A2I4HTB4; J3LZM0; A0A1U8IWE5; O49836; Q9FT38; W4ZZ52; A0A2I4FAV2; A0A218WDC4; L7Z…	A0A2G9G138 [231-244]	0	1623.89	14
FALSE	High	Unambiguous	EVFLTPAVLR	[KR].EVFLTPAVLR.[E]					0.144787	0.00292848	0.113	1	11	1	Q5YJQ9	A0A2I0X1Z0; Q5YJQ9; A0A2P2JK15; C7E3P3; A0A2P2JJX2; 731341461; A0A0K9Q7S2; A0A2H5Q0L3; A0A2I0ACP2; V4U923; A0A2I0VMV3	Q5YJQ9 [77-86]	0	1144.67	10
FALSE	High	Unambiguous	LFSTESATGRSSYTVVDHTYDAVVVGAGGAGLR	[R].LFSTESATGRSSYTVVDHTYDAVVVGAGGAGLR.[A]					0.167816	0.00563879	0.089	1	3	1	A0A251NBW0	A0A251NBW0; M5W1V2; A0A2P6RMG8	A0A251NBW0 [30-62]	1	3343.66	33
FALSE	High	Unambiguous	LSQEEIER	[R].LSQEEIER.[M]					0.184034	0.00627731	0.074	1	143	1	731321538	C1MKE9; A0A199V7A7; C6F656; Q03683; A0A2P2M7P8; B7U9Z3; Q42434; A0A022PZK2; A0A164WV60; C6F633; A0A061S6C8; O04223; A0A2P6R752; A0A2G3CX17; A0A1U8AUK4; Q587K1; A0A067KI98; A0A2P5WX97; A0A0D2T7I3; A0A059C3Q0; A0A022Q973; A0A251RKM4; A0A1S3YP64; A0A068U8Z8; A0A251NYN8; A0A0L9TH12; A0A2P5VNA6; 731321538; A0A103XR21; A0A2P5RHB8; A0A2H5NH09; I1K671; Q03681; A0A022QB98; A0A151RIG4; A0A1S3YJK2; A0A165ZM…	731321538 [541-548]	0	1003.51	8
FALSE	High	Unambiguous	LAEQFQSR	[K].LAEQFQSR.[A]					0.209405	0.00721273	0.053	1	3	1	731312251	A0A0K9R3R0; V5PZM8; 731312251	731312251 [115-122]	0	978.5	8
FALSE	High	Unambiguous	QEYDESGPSIVHR	[K].QEYDESGPSIVHR.[K]					0.0554704	0.00054243	0.269	1	6	1	A0A0D6QT83	D6C5B7; A0A0D6QUQ0; A0A2P4MJ31; A0A2P4M295; A0A0D6QT83; F2DZG9	A0A0D6QT83 [360-372]	0	1516.7	13
FALSE	High	Unambiguous	MGTDESALTR	[K].MGTDESALTR.[V]					0.15878	0.00409645	0.098	1	2	1	731338882	731338882; A0A0K9RLZ2	731338882 [257-266]	0	1080.5	10
FALSE	High	Unambiguous	NNNIIQGSPGPGR	[R].NNNIIQGSPGPGR.[T]					0.195707	0.00652397	0.064	1	1	1	731329959	731329959	731329959 [92-104]	0	1323.68	13
FALSE	High	Unambiguous	HDATDDVSLDAR	[K].HDATDDVSLDAR.[N]					0.0575556	0.00054243	0.263	1	1	1	731332836	731332836	731332836 [33-44]	0	1314.59	12
FALSE	High	Unambiguous	SQSLGIDYIPFR	[K].SQSLGIDYIPFR.[T]					0.101973	0.00224036	0.17	1	1	1	731325753	731325753	731325753 [296-307]	0	1395.73	12
FALSE	High	Unambiguous	IPGLNTLGVSMGR	[K].IPGLNTLGVSMGR.[I]					0.0579106	0.00054243	0.262	1	2	1	731337309	A0A0K9R898; 731337309	731337309 [85-97]	0	1314.72	13
FALSE	High	Unambiguous	IGPTVLVLAPTR	[RK].IGPTVLVLAPTR.[E]					0.0397951	0	0.323	1	9	2	A0A0J8FHS8	A0A0K9QDW7; A0A2R6XE55; A9SYT2; 731323731; A0A0J8FHS8; A0A2K1JW74; A0A176W8N1; A0A0K9QDW2; A0A199UYX3	A0A0J8FHS8 [576-587]	0	1236.77	12
FALSE	High	Unambiguous	QEGIEFPNLVNR	[K].QEGIEFPNLVNR.[H]					0.0890687	0.000962316	0.192	1	1	1	731350097	731350097	731350097 [178-189]	0	1415.73	12
FALSE	High	Unambiguous	IWDSLSGAETAVR	[R].IWDSLSGAETAVR.[T]					0.0407863	0	0.319	1	1	1	731338351	731338351	731338351 [343-355]	0	1404.71	13
FALSE	High	Unambiguous	LNNGAPVEFDGYMR	[K].LNNGAPVEFDGYMR.[I]					0.0679521	0.000962316	0.236	1	4	1	A0A0K9R8G1	731323359; A0A0K9RA06; A0A0K9R8G1; A0A0K9QAY4	A0A0K9R8G1 [514-527]	0	1582.73	14
FALSE	High	Unambiguous	LDTETFGNFPR	[KR].LDTETFGNFPR.[YNF]					0.0374214	0	0.333	1	5	2	731315650	A0A200RAR1; 1108878552; W1PMU6; 731315650; A0A0K9REM6	731315650 [537-547]	0	1296.62	11
FALSE	High	Unambiguous	NGNFEEGPYIFR	[K].NGNFEEGPYIFR.[N]					0.0324854	0	0.356	1	1	2	731320229	731320229	731320229 [198-209]	0	1442.67	12
FALSE	High	Unambiguous	LFISNPDLVQR	[R].LFISNPDLVQR.[F]					0.203064	0.00685958	0.058	1	1	1	731372169	731372169	731372169 [344-354]	0	1301.72	11
FALSE	High	Rejected	VAVLGASGYTGSEIVR	[R].VAVLGASGYTGSEIVR.[L]					0.00702459	0	0.605	0	2	1		A0A059ANA1; A0A059APB2		0	1578.85	16
FALSE	High	Unambiguous	MISAEAPVVFAR	[RK].MISAEAPVVFAR.[A]					0.116032	0.00257247	0.149	1	66	1	A0A2P2K993	A0A1U8E2U5; A0A1R3JKE4; M4EPM9; A0A2K3KZT7; K4AXN2; D7KIW9; B7FI76; E4MWL0; V4MER4; A0A2P5XFW0; A0A1U8MZ17; A0A0D2PMH4; W8EDQ7; A0A2R6P528; A0A1J3F653; M0ZUW6; A0A087H0F8; A0A1U8A2K9; A0A087HM49; Q9ZVL3; M1AHZ0; A0A2P2K921; A0A0D3C8M0; A0A2G2XQX0; A0A2P2K954; B9RF36; R0I491; A0A078GBD3; A0A078H3S3; A0A1U8LLN2; B9DFS3; I3SQH5; A5B819; A0A2P2K993; A0A2R6PK66; A0A1U8E0E6; A0A2G3AL57; A0A1J3IUN5; A0A…	A0A2P2K993 [139-150]	0	1290.69	12
FALSE	High	Unambiguous	SELLYAVGPYGR	[R].SELLYAVGPYGR.[L]					0.144787	0.00292848	0.113	1	1	1	731336020	731336020	731336020 [159-170]	0	1324.69	12
FALSE	High	Unambiguous	MGPTVLVLSPTR	[KR-].MGPTVLVLSPTR.[E]					0.0551303	0.00054243	0.27	1	29	1	A0A2I0XCY9	A0A2H3XZN7; A0A0K9PG21; A0A2G5F1P9; A0A2I0XCY9; A0A2I0B2M4; A0A218WGD2; A0A2G5F1R8; A0A1U8I3I6; A0A251SJS6; G7KHJ1; A0A2H3ZEQ1; A0A0B0NUZ3; A0A0D2NL27; A0A1U8I972; A0A2I0AMD0; A0A0D2Q2E1; A0A2P5RMW9; A0A2K3PHQ8; A0A1U8HQM7; A0A2G5F1Y7; A0A1S2XH10; A0A0D2SRC3; A0A2H3XZV5; 1108798190; A0A2I0WCC8; A0A0D2RWC2; A0A2P5VYC4; A0A2G5F1K1; A0A2I0LEV3	A0A2I0XCY9 [235-246]	0	1270.72	12
FALSE	High	Unambiguous	LDNVVLLPHVASGTVETR	[K].LDNVVLLPHVASGTVETR.[T]					0.000957704	0	0.929	1	2	2	731359538	A0A0K9RRG5; 731359538	731359538 [271-288]	0	1920.05	18
FALSE	High	Unambiguous	DHGAVWTSTPPPSGPLAIR	[R].DHGAVWTSTPPPSGPLAIR.[M]					0.01926	0	0.441	1	1	2	731367581	731367581	731367581 [201-219]	0	1959.01	19
FALSE	High	Unambiguous	YLAEFLAGDER	[R].YLAEFLAGDER.[K]					0.0452814	0	0.302	1	1	1	731339792	731339792	731339792 [137-147]	0	1283.63	11
FALSE	High	Unambiguous	AGVAAGMPVIGISTR	[KR].AGVAAGMPVIGISTR.[N]					0.00949506	0	0.556	1	6	2	731367585	A0A1S2YY27; 731367585; G7JYQ1; A0A2K3NR32; 731367587; I3T3F1	731367585 [200-214]	0	1399.77	15
FALSE	High	Unambiguous	NPPIEEVVQSGVVPR	[R].NPPIEEVVQSGVVPR.[L]					0.0822248	0.000962316	0.205	1	2	1	731346765	A0A0K9QZT7; 731346765	731346765 [107-121]	0	1619.88	15
FALSE	High	Unambiguous	TAIAPVNPTFLPR	[KR].TAIAPVNPTFLPR.[TSNV]					0.0388281	0	0.327	1	251	1	A0A2P5WWH9	A0A067GDP7; M1CYS1; A0A165XE82; A0A2P4HT42; A0A0D9X3U4; A0A0D2PB36; A0A2J6LQP2; A0A0D9X3U3; A0A2R6QPN9; A0A0D3GVS0; A0A2R6Q9B9; A0A1U8L420; A0A2P5DFD1; M0TF87; A0A2P5CJE2; A5CA87; A0A0D2PAU3; A0A2H3X0G8; A0A2P5RHC8; A0A287WXZ5; A0A2P5EDN9; 731371754; A0A1Q3BZD4; A0A2P5DJS0; A0A2I4HSK2; A0A0D2TFW8; A0A287WY71; A0A1R3IBB3; A0A0D2RY26; A0A067ENM9; A0A1J3K8U7; A0A1J3DXV9; A0A0D2SCM9; A0A103YG16; A0A2…	A0A2P5WWH9 [226-238]	0	1396.79	13
FALSE	High	Unambiguous	TSPNVADAAVAR	[K].TSPNVADAAVAR.[I]					0.0604582	0.00054243	0.255	1	2	1	731312585	731312585; A0A0K9RN31	731312585 [124-135]	0	1171.61	12
FALSE	High	Unambiguous	IGGTPAVIR	[K].IGGTPAVIR.[YHLF]					0.123392	0.00257247	0.139	1	94	2	A0A200R2E1	A0A1D1YZH9; A0A061EJZ9; A0A1J3ET87; V7BRV6; A0A1U8EW31; A0A2C9UE54; A0A0B0MP26; W9R9B5; A0A2G2ZK49; A0A2K2B8Q8; A0A1J3K3C9; A0A2P5DHU7; A0A061EST7; A0A067DPX1; A0A059B2H6; B9H085; A0A0K9NLI2; A0A0A0L6U0; G7IRL3; A0A067JC64; M4DEV1; M4EHV2; A0A251SF80; A0A1U8LIG4; A0A218WJ71; B9GMG3; K4C234; A0A078I644; A0A2P5SQ61; A0A2N9HBA6; A0A078FY76; A0A2G5CY72; A0A1S3ZK66; A0A0D2RUT1; K4DF90; A0A1U8PCH0; A0A…	A0A200R2E1 [387-395]	0	883.536	9
FALSE	High	Unambiguous	ISVGTPDEAR	[R].ISVGTPDEAR.[H]					0.0558126	0.00054243	0.268	1	1	1	731368735	731368735	731368735 [6-15]	0	1044.53	10
FALSE	High	Unambiguous	QAAAVLADEDVDDTSVSSSRR	[R].QAAAVLADEDVDDTSVSSSRR.[N]					6.05302e-05	0	1.378	1	1	3	731341935	731341935	731341935 [16-36]	1	2192.04	21
FALSE	High	Unambiguous	SQSSLEELYLMNDGISEEAAR	[K].SQSSLEELYLMNDGISEEAAR.[A]					0.0241815	0	0.404	1	5	1	731310828	F6HDM7; 731310828; A5ASC3; A5C807; F6H2F2	731310828 [238-258]	0	2342.08	21
FALSE	High	Unambiguous	VFTPSVIEPSFGIGR	[RK].VFTPSVIEPSFGIGR.[I]					0.00315789	0	0.735	1	151	1	A0A0J8B6U7	A0A1Q3BVT8; A0A0E0AY91; A0A162ABD2; A0A078HXF5; E5DD03; A0A2P6R011; D7SH83; A0A1U7WKT7; A0A2P5YW82; A0A1J3ISR6; A0A068TQK4; A0A2I0AH11; A0A151TDH7; A0A2N9FAV2; A0A1R3J560; K4BLW8; V7B3U0; M4EN09; A0A1D6KKI8; A0A1R3JJ07; F6HJ70; A0A1U7XSA6; E5DCZ9; A0A068VEG7; A0A0E0END1; A0A2G3CEI7; A0A2I4GCK7; A0A1J6J2V1; A0A2P2KBX2; A0A2K3NJG1; A0A0D3H2N3; A0A2I0VRZ9; A0A0Q3FLU4; A0A078GM45; A0A2P2KBT3; A0A2C9V…	A0A0J8B6U7 [528-542]	0	1605.86	15
FALSE	High	Unambiguous	NSYQLPVVAAATSSQPPPVAPVPVR	[R].NSYQLPVVAAATSSQPPPVAPVPVR.[S]					0.000911725	0	0.937	1	1	1	731361352	731361352	731361352 [104-128]	0	2545.38	25
FALSE	High	Unambiguous	SGAEEVFPLGPLNEYER	[R].SGAEEVFPLGPLNEYER.[A]					0.0558126	0.00054243	0.268	1	1	1	731339293	731339293	731339293 [318-334]	0	1906.92	17
FALSE	High	Selected	VVDLVGERDIPVIAAGGIVDAR	[R].VVDLVGERDIPVIAAGGIVDAR.[G]					0.00573428	0	0.638	1	3	2	D7MR91	731358046; D7MR94; D7MR91	D7MR91 [156-177]	1	2234.25	22
FALSE	High	Selected	VVDLVGDREIPVIAAGGIVDAR	[R].VVDLVGDREIPVIAAGGIVDAR.[G]					0.00640555	0	0.62	1	3	2	A0A151T0R0	C6T611; A0A151T0R0; K7L7D2	A0A151T0R0 [158-179]	1	2234.25	22
FALSE	High	Unambiguous	SPPIEEVIEAGVVPR	[R].SPPIEEVIEAGVVPR.[F]					0.090171	0.000962316	0.19	1	11	1	731320622	A0A0D6QSL4; 731320622; M4D8D0; A0A1J3FEU0; W1P9R3; A0A1J3I4A3; A0A1J3CWX9; A0A0D3DEC3; A0A078F8P7; A0A1J3IIN8; A0A0C9RX50	731320622 [106-120]	0	1591.87	15
FALSE	High	Unambiguous	LLASPSDDVREQAVWALGNVAGDSPR	[K].LLASPSDDVREQAVWALGNVAGDSPR.[C]					6.35829e-05	0	1.37	1	44	3	731320622	A0A1S2XYI7; A0A103XGG8; A0A2I0I5A3; A0A118JWV3; A0A218XU57; A0A067G0C0; A0A1U8HPC2; A0A0S3SQJ1; A0A1Q3B0L5; A0A0V0IM05; A0A1J7HK67; A0A1S3V6M0; A0A0D2VGH3; A0A067G8V5; I1NJ46; A0A251TE75; A0A1S8ACL4; G7KWI2; 731320622; A0A2P5SLT6; A0A2I0I583; K4AWF0; A0A1R3G689; V7BHI2; A0A2J6JLV3; A0A151U517; A0A1U8HVB9; A0A0B0PTG4; A0A1U8IBR0; A0A2R6PVV0; A0A1R3GK05; A0A2K3P583; A0A2J6L798; A0A2P6QYU8; M5XQ76; …	731320622 [167-192]	1	2723.37	26
FALSE	High	Unambiguous	EVNVISGLPAATSTERLDILDDTR	[R].EVNVISGLPAATSTERLDILDDTR.[C]					0.0439102	0	0.307	1	1	1	731332499	731332499	731332499 [121-144]	1	2585.34	24
FALSE	High	Selected	IFVGGLPPTLSEEGFR	[K].IFVGGLPPTLSEEGFR.[EQ]					0.19213	0.00652397	0.067	1	8	1	M5XFA4	M5XFA4; A0A2N9GTS0; A0A2J6MGJ5; A5BK88; A0A2N9GUX1; A0A2P5ABC9; F6H8S2; A0A2P5FAK9	M5XFA4 [112-127]	0	1718.91	16
FALSE	High	Rejected	IFVGGLPPTLTDEGFR	[K].IFVGGLPPTLTDEGFR.[Q]					0.19213	0.00652397	0.067	0	2	1		731320707; A0A0K9QI26		0	1718.91	16
FALSE	High	Unambiguous	DFRDPTTAWVGPDGIWR	[K].DFRDPTTAWVGPDGIWR.[L]					0.0544564	0.00054243	0.272	1	3	1	731322678	Q8VWP5; 731322678; Q8VXS6	731322678 [257-273]	1	1988.96	17
FALSE	High	Unambiguous	SMIPELLPQLDGR	[R].SMIPELLPQLDGR.[S]					0.205577	0.00685958	0.056	1	3	1	1108865121	1108865121; A0A0J8B373; A0A0J8DX51	1108865121 [829-841]	0	1468.78	13
FALSE	High	Unambiguous	MFVLDEADEMLSR	[-KRN].MFVLDEADEMLSR.[G]					0.0802267	0.000962316	0.209	1	252	1	731317796	F6H398; A0A250WZ14; A0A2P6TMQ5; A0A022QPW4; C6T8X3; A0A199VZB2; A0A1S4B711; A0A0V0GR74; Q9SE87; A0A1J6JRM8; A0A078IV54; A0A0D3CKF2; Q41741; A0A2R6PSV8; A0A0K9RJW6; A0A067G4Y2; C6TJ25; A0A251TQE9; A9PA36; A0A151T5F4; A0A2P5QXC6; A0A0N7KMN9; A0A1U7WLR1; D7L2A1; A0A2C9W2K9; A0A0E0HUY0; A0A1D6AHD7; Q40465; F2DPE3; M1AEQ1; A5BI23; A0A2I0IIZ6; A0A1U8EV12; A0A2K2B1D8; A0A2G2WKU9; D8SGB8; A0A2J6JSH1; M0T…	731317796 [185-197]	0	1555.71	13
FALSE	High	Unambiguous	VMLLPEDPNATHIMIATGTGVAPYR	[K].VMLLPEDPNATHIMIATGTGVAPYR.[G]					0.00229354	0	0.787	1	2	1	731360654	A0A0K9QK96; 731360654	731360654 [217-241]	0	2667.36	25
FALSE	High	Unambiguous	LPGLNTLGISLAR	[RK].LPGLNTLGISLAR.[ILV]					0.00497791	0	0.661	2	85	2	A0A2N9GJ55; A0A251KV71	A0A1S3B9J8; A0A2G9G5C7; A0A2N9GJ55; A0A2P4HC55; A0A2N9FGP7; A0A2C9VG88; M7Y5V3; A0A067JLV7; A0A2C9VH55; A0A251KEB5; A0A2N9ERR6; K3YLT0; A0A067JW65; A0A2P4MTD2; M8APR1; C5YI11; A0A2C9VHW5; B9T180; K3Y9I6; A0A2C9VIA9; A0A1D6PUN9; A0A067KFL3; A0A2P4H837; A0A2C9VHI8; A0A2G9GJT7; W5H6A7; A0A2P4HBT7; R7VZH4; A0A287JWH7; A0A2C9VFX7; A0A1D5WRI2; A0A2G9G5C4; A0A2N9F3P4; A0A2C9VI98; B9SX76; A0A2C9VG89; A0A…	A0A2N9GJ55 [88-100]; A0A251KV71 [89-101]	0	1324.79	13
FALSE	High	Unambiguous	SQSNLEELYLMNDGISEEAAR	[K].SQSNLEELYLMNDGISEEAAR.[A]					0.00304348	0	0.741	1	2	1	A0A2R6PKC5	A0A2R6PKC5; 731350697	A0A2R6PKC5 [241-261]	0	2369.09	21
FALSE	High	Unambiguous	DGRVSSSSDALNLPSPLESIASQR	[R].DGRVSSSSDALNLPSPLESIASQR.[Q]					0.00135146	0	0.873	1	1	1	731353308	731353308	731353308 [141-164]	1	2486.25	24
FALSE	High	Selected	EGLDAAIEGMNGQTLDDRQITVNEAQSR	[K].EGLDAAIEGMNGQTLDDRQITVNEAQSR.[S]					0.000441256	0	1.055	1	1	1	731358686	731358686	731358686 [60-87]	1	3031.44	28
FALSE	High	Rejected	DALDAAIEGMNGQTLDDRQITVNEAQSR	[K].DALDAAIEGMNGQTLDDRQITVNEAQSR.[S]					0.000441256	0	1.055	0	2	1		A0A0K9RE72; A0A0K9RDR0		1	3031.44	28
FALSE	High	Unambiguous	TMLTYTPLISNPVR	[R].TMLTYTPLISNPVR.[T]					0.0271788	0	0.385	1	1	1	731333104	731333104	731333104 [244-257]	0	1605.87	14
FALSE	High	Unambiguous	TGGAGAGDDWRTAFDAAANGPTDFSR	[R].TGGAGAGDDWRTAFDAAANGPTDFSR.[T]					0.00860522	0	0.572	1	1	1	731341935	731341935	731341935 [849-874]	1	2584.14	26
FALSE	High	Unambiguous	DVATAHILSFEVPSAEGR	[K].DVATAHILSFEVPSAEGR.[Y]					0.182906	0.00627731	0.075	1	1	1	731325753	731325753	731325753 [231-248]	0	1898.96	18
FALSE	High	Unambiguous	TINVPEGFDYELYNRDDINR	[K].TINVPEGFDYELYNRDDINR.[I]					0.0718194	0.000962316	0.227	1	1	1	K4BNE0	K4BNE0	K4BNE0 [52-71]	1	2443.15	20
FALSE	High	Unambiguous	LAYTLLYPSSGVGITGR	[K].LAYTLLYPSSGVGITGR.[G]					0.00291524	0	0.748	1	1	1	731327862	731327862	731327862 [817-833]	0	1767.96	17
FALSE	High	Unambiguous	LYEQQIEQLGNMQLR	[R].LYEQQIEQLGNMQLR.[I]					0.0292605	0	0.373	1	1	1	A0A0J8BAE9	A0A0J8BAE9	A0A0J8BAE9 [69-83]	0	1862.94	15
FALSE	High	Unambiguous	NEYILEDYAPGQFGDR	[K].NEYILEDYAPGQFGDR.[I]					0.00706792	0	0.604	1	1	1	731313066	731313066	731313066 [25-40]	0	1886.86	16
FALSE	High	Unambiguous	YDDSALIPEEQFLAQHPGPVR	[K].YDDSALIPEEQFLAQHPGPVR.[I]					0.00711152	0	0.603	1	1	1	731315358	731315358	731315358 [699-719]	0	2382.17	21
FALSE	High	Unambiguous	TEQPHPVDSSSAVDPLDVYDYVR	[R].TEQPHPVDSSSAVDPLDVYDYVR.[D]					0.00598654	0	0.631	1	1	1	731337313	731337313	731337313 [22-44]	0	2589.21	23
FALSE	High	Unambiguous	LTLDQDNFLLR	[K].LTLDQDNFLLR.[S]					0.0177801	0	0.454	1	1	2	731319852	731319852	731319852 [372-382]	0	1347.73	11
FALSE	High	Unambiguous	QQQQQQLLSQVLSEQQLVQR	[R].QQQQQQLLSQVLSEQQLVQR.[F]					0.00300628	0	0.743	1	2	1	1108875682	1108875682; A0A0K9QZV1	1108875682 [1000-1019]	0	2409.28	20
FALSE	High	Unambiguous	DATVLTGGPSWVVPLGRR	[R].DATVLTGGPSWVVPLGRR.[D]					0.00210433	0	0.801	1	1	7	731337449	731337449	731337449 [146-163]	1	1881.03	18
FALSE	High	Unambiguous	YGYEMPVDVLAR	[RK].YGYEMPVDVLAR.[WCV]					0.0631178	0.00054243	0.248	1	14	1	A0A0J8B475	S8DTP5; A0A2R6QUM0; A0A2R6PT30; A0A2R6Q5B1; M5WV12; A0A218XMP0; A0A2J6MCE7; A0A0J8B475; B9RR89; A0A2G9G8D3; A0A059LMA8; A5ALB2; A0A103XW12; A0A251UU89	A0A0J8B475 [105-116]	0	1412.69	12
FALSE	High	Unambiguous	IQSLLSLLPPSASTSDSLSSLADSDRPAR	[R].IQSLLSLLPPSASTSDSLSSLADSDRPAR.[S]					0.214621	0.00825917	0.049	1	2	1	A0A0J8B209	A0A0J8B209; 1108917318	A0A0J8B209 [86-114]	0	2984.55	29
FALSE	High	Unambiguous	VIHDNFGIVEGLMTTVHAITATQK	[K].VIHDNFGIVEGLMTTVHAITATQK.[T]					0.0464092	0	0.298	1	7	1	P08735	J3MQ06; A0A1D6PWR7; K7UBU0; C4JBS8; C0PC38; P08735; A0A1D6PWS2	P08735 [165-188]	0	2595.36	24
FALSE	High	Unambiguous	LDGTILKEFVAENYTAPR	[R].LDGTILKEFVAENYTAPR.[M]					0.182906	0.00627731	0.075	1	4	2	A0A2N9G0K0	A0A2I4GHA7; A0A2I4DVB7; A0A2N9G0K0; A0A2I4DVC1	A0A2N9G0K0 [238-255]	1	2037.07	18
FALSE	High	Unambiguous	IGGVNVPHLHPR	[K].IGGVNVPHLHPR.[A]					0.00503952	0	0.659	1	1	1	731345092	731345092	731345092 [106-117]	0	1295.73	12
FALSE	High	Unambiguous	HRQTQEVLYSAVATTDR	[R].HRQTQEVLYSAVATTDR.[T]					0.0144252	0	0.488	1	1	1	731312901	731312901	731312901 [62-78]	1	1975	17
FALSE	High	Unambiguous	VGPGGRELAGSFVNVPHR	[K].VGPGGRELAGSFVNVPHR.[H]					0.0953028	0.00187066	0.181	1	1	1	M0TB82	M0TB82	M0TB82 [485-502]	1	1848.98	18
FALSE	High	Unambiguous	NKFAAVGLDITDVVALSGGHTIGR	[K].NKFAAVGLDITDVVALSGGHTIGR.[A]					0.0469835	0	0.296	1	1	2	M0T641	M0T641	M0T641 [174-197]	1	2411.3	24
FALSE	High	Unambiguous	GLNAPHTHPR	[KR].GLNAPHTHPR.[GA]					0.107777	0.00224036	0.161	1	22	1	M0U695	C7S8C7; A0A0B2R5T4; A0A0R0EIG9; C7S8C8; M0U695; A0A151QWH8; C7S8B6; A0A0S3RVZ4; I1N7M4; C6T5N6; A0A151UFJ7; M0T1Z8; A0A0B2P951; A0A1S3W039; V7B8Q2; A0A0B2PP16; M0T201; M0T200; A0A0B2R578; A0A0B2RB71; A0A0B2RAK1; C7S8D4	M0U695 [102-111]	0	1099.58	10
FALSE	High	Rejected	IDYAPFGLNPPHVHPR	[R].IDYAPFGLNPPHVHPR.[A]					0.145681	0.00292848	0.112	0	1	1		A0A022R3Z6		0	1829.94	16
FALSE	High	Unambiguous	HSYGAVWQTNHVPAGPLR	[R].HSYGAVWQTNHVPAGPLR.[F]					0.00566418	0	0.64	1	1	3	731358315	731358315	731358315 [188-205]	0	1990	18
FALSE	High	Unambiguous	SHLQNYIATHYTAPR	[K].SHLQNYIATHYTAPR.[M]					0.0163133	0	0.468	1	1	2	731363369	731363369	731363369 [255-269]	0	1771.89	15
FALSE	High	Unambiguous	VVETFSEYPPLGR	[-].VVETFSEYPPLGR.[F]					0.0117033	0	0.522	1	1	1	A6N0I8	A6N0I8	A6N0I8 [1-13]	0	1493.76	13
FALSE	High	Unambiguous	IGRIEDVTPIPTDSTR	[KR].IGRIEDVTPIPTDSTR.[R]					0.00126306	0	0.884	1	202	4	A0A162ADI1	M4E2Q1; A0A162ADI1; A0A2P2LKL4; A0A1U8EGK0; A0A2P5WEL8; A0A0D3BAR1; A0A2H9ZW52; R0FRR7; A0A061GW32; A0A022R6A8; A0A087H309; A0A1J3DRM3; A0A2P5XLR8; A0A200Q0S8; A0A068V849; A0A2P2L0Y9; A0A0D2SYF1; A0A2G9GC36; A0A2P5RQ37; F2E3D6; D8SVD4; A0A2H5N4H1; A0A1U7ZTQ7; Q1H555; 731347406; A0A2H5N691; A0A2P5Y7M8; A0A2I0IUE7; M0TWT0; A0A218XCW4; A0A2G5DER7; M4DL77; A0A118K3B3; D7TK38; A0A078HYT7; A0A067KRG4; …	A0A162ADI1 [1211-1226]	1	1769.94	16
FALSE	High	Unambiguous	TRTHDLDDLFSR	[R].TRTHDLDDLFSR.[Y]					0.101348	0.00224036	0.171	1	6	1	A0A0K9RYU2	A0A0K9RYU2; A0A0K9RX61; 731318471; A0A0K9QJL2; 731318473; A0A0K9QHM1	A0A0K9RYU2 [39-50]	1	1475.72	12
FALSE	High	Unambiguous	TGDLGEILIR	[K].TGDLGEILIR.[C]					0.0705065	0.000962316	0.23	1	3	1	731312030	A0A0J8DVD8; 731312030; A0A0K9R4D7	731312030 [57-66]	0	1086.62	10
FALSE	High	Unambiguous	NPEYYEDEHLR	[R].NPEYYEDEHLR.[T]					0.0252452	0	0.397	1	4	4	731373639	731373639; 1108864194; 731373642; A0A0K9RII2	731373639 [467-477]	0	1464.64	11
FALSE	High	Unambiguous	GYSFTTTAER	[R].GYSFTTTAER.[EAK]					0.126465	0.00257247	0.135	1	253	1	A0A089VH99	A0A2P6VQQ9; P93587; A0A1U8PMS9; A0A1V0JJV7; A2WXB0; P53494; A0A1S6PCM4; A0A089VH99; K7SLD7; A0A0L9UNI8; A0A1U8JDB9; H1ZSM0; A2ZN74; A0A2J6KMQ2; P30167; O81221; R0F1E6; A0A087SSM0; I1QXY9; D9J011; A0A2R6PPX7; B6TQ08; A0A0D2TDU9; Q9LL43; A0A2I0BD67; A0A2R6QT42; A0A2H3XI76; B8AMT7; A0A0K0VH32; C5XQM4; A0A2I4HQN6; A0A0A7LWK3; A0A0U5BHY8; I0DHH3; J7EQ07; Q96484; A0A140KXU4; A0A288W8K9; A0A0E0BFP6; A0A…	A0A089VH99 [199-208]	0	1132.53	10
FALSE	High	Unambiguous	QITVNDLPVGR	[R].QITVNDLPVGR.[SN]					0.0174551	0	0.457	1	4	2	A0A1D2AEU0	A0A087SL52; A0A150GWX5; A0A1D2AEU0; A0A250WQI9	A0A1D2AEU0 [164-174]	0	1211.67	11
FALSE	High	Unambiguous	LWDDVLAAR	[K].LWDDVLAAR.[H]					0.162734	0.00409645	0.094	1	2	1	731350277	731350277; 1108961112	731350277 [7-15]	0	1058.56	9
FALSE	High	Unambiguous	LTSLGGQLIEHQEAALEASR	[K].LTSLGGQLIEHQEAALEASR.[I]					0.0257153	0	0.394	1	1	4	731317764	731317764	731317764 [729-748]	0	2123.11	20
FALSE	High	Rejected	NAVVTVPAYFSDNQR	[K].NAVVTVPAYFSDNQR.[Q]					0.0528073	0	0.277	0	4	3		A0A1J3G2C4; A0A1J3CQT6; A0A1J3HE52; A0A1J3JRC7		0	1680.83	15
FALSE	High	Unambiguous	VATSSVDPAAPLSEQTISQALALAR	[K].VATSSVDPAAPLSEQTISQALALAR.[E]					0.049353	0	0.288	1	2	1	731348171	A0A0K9RS97; 731348171	731348171 [151-175]	0	2496.33	25
FALSE	High	Unambiguous	SMTEAEQQQLIDDHFLFDKPVSPLLLASGMAR	[K].SMTEAEQQQLIDDHFLFDKPVSPLLLASGMAR.[D]					0.0450038	0	0.303	1	1	1	C0PBJ3	C0PBJ3	C0PBJ3 [178-209]	0	3587.79	32
FALSE	High	Unambiguous	DRASLPQPLPNPPPLAPLPMLAPDAR	[RK].DRASLPQPLPNPPPLAPLPMLAPDAR.[T]					0.205577	0.00685958	0.056	1	4	1	731326191	731326191; A0A0K9RPH1; 731326194; 1108906778	731326191 [182-207]	1	2744.49	26
FALSE	High	Unambiguous	FDGALNVDITEFQTNLVPYPR	[R].FDGALNVDITEFQTNLVPYPR.[I]					0.00306226	0	0.74	2	268	6	A0A164Y0E4; A0A067L0Y2	A0A0D9VRB2; A9NIV4; A0A022PWB6; A0A0U1WT57; A4K4Z0; A0A1U9X478; Q0ZUM7; G9FP74; A0A0K9RUV8; A0A059D910; A0A0D2UB54; A0A0D2TBH6; R0FBY0; A0A287PG34; A0A1D2A0Y0; V7CUY9; A0A2R6PQM7; A0A161XEE0; A0A162B2V9; A0A2H5PZQ2; D8QW18; D8RRS5; E1Z4E5; D8RNM7; A6YIK6; A0A1B2RWS0; A0A0D2IUV7; A0A2K3KUM7; A0A0D3B200; Q0ZUN6; A0A0S3RWI6; A0A061R7V3; V4U3G8; I1K3X9; C5WSQ3; R0GEE0; A0A0D3AK04; D8T2F5; A0A2R6WQP2;…	A0A164Y0E4 [242-262]; A0A067L0Y2 [244-264]	0	2409.21	21
FALSE	High	Unambiguous	LFGKIVITTSSGIMDHEEAR	[R].LFGKIVITTSSGIMDHEEAR.[R]					0.108442	0.00224036	0.16	1	1	1	A0A061RCF1	A0A061RCF1	A0A061RCF1 [123-142]	1	2204.14	20
FALSE	High	Unambiguous	NPVHNGHALLMTDTR	[R].NPVHNGHALLMTDTR.[RKTCGQ]					0.152089	0.00373344	0.105	1	207	1	A0A0K9QLM5	A0A0B0NFF7; A0A0D2R982; A0A173GQ24; A0A2H9ZZV3; A0A176VUX1; A0A2K1YQS0; A0A072W0C8; A0A1J3CP39; A0A0V0IDG9; A0A1J6IDU3; A5AV70; A0A2I7ZAW6; M0SEC4; A0A0D2SB12; V4NMD5; T2DN26; K4BDU9; 731376505; A0A287SBG6; A0A2P4J066; I1LDY8; B9RTI9; C5X183; A0A1E5VNW5; A0A0D9ZCZ8; A0A061ELW2; A0A218XRJ7; A0A2G2ZKU2; A0A1J3EHG0; A0A1U7WID1; A0A067GGC7; A0A200PZ76; W9RXT4; M0RZR6; A0A2G9GEW9; C0PFQ7; A0A2I4G6A4; …	A0A0K9QLM5 [254-268]	0	1675.83	15
FALSE	High	Unambiguous	IDVAPYGVNTPHHHPR	[R].IDVAPYGVNTPHHHPR.[A]					0.000811177	0	0.956	2	3	10	731313236; 731323526	731313236; 731323526; A0A0K9QRG3	731313236 [100-115]; 731323526 [100-115]	0	1809.91	16
FALSE	High	Unambiguous	IRNTSPDAGRYEERPVAAGTLNVAQLR	[R].IRNTSPDAGRYEERPVAAGTLNVAQLR.[H]					0.0782772	0.000962316	0.213	1	2	1	731373717	1108864229; 731373717	731373717 [108-134]	2	2954.56	27
FALSE	High	Rejected	IAPDEHPVLLTEAPLNPK	[R].IAPDEHPVLLTEAPLNPK.[A]					0.058989	0.00054243	0.259	0	1	1		A0A068TML6		0	1954.06	18
FALSE	High	Unambiguous	VAPEEHPVLLTEAPINPK	[R].VAPEEHPVLLTEAPINPK.[A-STVEY]					0.0586273	0.00054243	0.26	2	264	6	731311844; A0A0D6QT83	P93375; A0A075D1U0; E3UU93; F8J142; P93587; A0A2G9H4B2; A0A1U8PMS9; P53494; A0A068FKL6; P85911; A0A2P5EDE9; K7SLD7; A0A1U8JDB9; H1ZSM0; D7R817; A2ZN74; A0A1Z2THY3; A0A2J6KMQ2; A0A1S2X9D4; P30167; O81221; A0A087SSM0; I1QXY9; B6TQ08; A0A251T1X6; A0A075D1A6; A0A2G9FZY4; A0A2J6KDU7; K7TH60; A0A144KBS5; A0A1B6P5M1; A0A0G2YJA6; Q2XTC1; A0A2H3XI76; Q7XZJ5; A0A0K0VH32; P30171; P30165; P46258; D6C5B7; 731…	731311844 [98-115]; A0A0D6QT83 [96-113]	0	1954.06	18
FALSE	High	Unambiguous	FRTESGTEPDIDLATITDR	[K].FRTESGTEPDIDLATITDR.[M]					0.0320883	0	0.358	1	1	1	731350591	731350591	731350591 [47-65]	1	2137.04	19
FALSE	High	Selected	KGLSAKEMVALSGAHTIGQAR	[K].KGLSAKEMVALSGAHTIGQAR.[C]					0.134487	0.00292848	0.125	1	2	1	A0A2H5QU22	A0A2H5QU22; A0A067EED8	A0A2H5QU22 [51-71]	2	2125.15	21
FALSE	High	Unambiguous	TIGIIHPPPDIR	[RK].TIGIIHPPPDIR.[NTVSAGIM]					0.082732	0.000962316	0.204	1	102	1	731315358	A0A067L4F7; A0A2P5AJF7; A0A0K9PQD7; A0A0D2PTG6; C5XGI9; F2CXU0; I1KZW4; A0A2I4GE32; A0A0R0GC27; A0A067ET97; A0A1S3V643; A0A0D3CA72; A0A178W732; C0PG74; A0A067EU36; 731315358; D7KK48; A0A2K3NEW0; A0A199VRR9; A0A1U8JV36; A0A287MPK1; A0A1J7HJD6; W9SAG2; A0A1J3GBJ0; A0A2J6KII3; A0A2K2AE55; A0A2K1ZQJ1; A0A059Q077; A0A2N9GTP4; K7LLK0; A0A0D9YPT8; A0A251RM53; A0A0E0JXW9; A0A218VT88; V7BB20; A0A2K3N7M5; …	731315358 [53-64]	0	1328.77	12
FALSE	High	Unambiguous	THDLDDLFSR	[R].THDLDDLFSR.[Y]					0.0433734	0	0.309	1	6	1	A0A0K9RYU2	A0A0K9RYU2; A0A0K9RX61; 731318471; A0A0K9QJL2; 731318473; A0A0K9QHM1	A0A0K9RYU2 [41-50]	0	1218.57	10
FALSE	High	Unambiguous	LILPGELAK	[RK].LILPGELAK.[H]					0.0988852	0.00224036	0.175	1	54	9	A0A2P4LAL6	A9STF4; A0A176WS94; A0A1Y1IV48; D8SXE2; A0A061R453; A0A1D2A944; I0YL88; I0YL44; A0A061SNR7; C1E433; A0A1Y5I7C0; D8R882; D8SW41; A0A0D6R1Z8; A0A061S2K1; A0A2P4MCR9; D8RNW6; A0A090MEQ9; A0A087SME4; A9RXL7; A0A176WAZ2; A9SNM0; A9TL67; A0A2R6WE74; A0A2P4LAL6; A9SNM2; A0A061SDI2; A0A250XT46; A0A250WP29; C1EAM8; A0A1D1YWV8; A0A1U7Y626; K8EHQ7; A4S1C9; A0A2R6X600; T1N5G8; A0A1Y1I7E3; K8EZ76; A9TC10; D8S…	A0A2P4LAL6 [183-191]	0	953.603	9
FALSE	High	Unambiguous	LSASTPVADRDSATDTSAGR	[R].LSASTPVADRDSATDTSAGR.[T]					0.0113489	0	0.527	1	1	1	731336960	731336960	731336960 [89-108]	1	1977.95	20
FALSE	High	Unambiguous	AGEDADTLGLTGHER	[K].AGEDADTLGLTGHER.[YF]					0.00459542	0	0.674	2	69	2	A0A218X4F6; 731329677	A0A287PU24; A0A1D6JMZ9; M7YMT4; M4D1R9; A0A1D6PJK9; A0A1D6JN15; V4MDR7; M5XA02; A0A1R3ILJ6; A0A251Q3U4; A0A059DEW1; A0A2J6KZ38; A0A287PU28; A0A287PU39; A0A2P6S288; A0A103Y4C0; A0A1D5YLT8; A0A2I0ITX7; A0A251V7G1; A0A1D6JN16; Q1KSB0; A0A287PU22; A0A287PU20; A0A1E5VPZ9; N1QRT2; A0A1D6PJL1; A0A061DF56; A0A2I4GX61; A0A1D6JN12; A0A2G2WD65; A0A0A9FHY1; A0A287PU30; G3BMW4; A0A2G2Z3B6; W1NSR4; A0A2G3AYZ7;…	A0A218X4F6 [925-939]; 731329677 [942-956]	0	1541.72	15
FALSE	High	Unambiguous	QLQQETGTSIHVEDASNQSEER	[R].QLQQETGTSIHVEDASNQSEER.[V]					0.00101221	0	0.92	1	1	1	731315828	731315828	731315828 [333-354]	0	2486.14	22
FALSE	High	Unambiguous	SNEEAAVSVDTPSAVHSEAR	[K].SNEEAAVSVDTPSAVHSEAR.[N]					0.000409864	0	1.067	1	3	2	731373639	731373639; 1108864194; 731373642	731373639 [447-466]	0	2055.96	20
FALSE	High	Unambiguous	IDRTGNGGVIVDSGTSVTR	[K].IDRTGNGGVIVDSGTSVTR.[L]					0.0551303	0.00054243	0.27	1	1	1	731311266	731311266	731311266 [353-371]	1	1903.98	19
FALSE	High	Unambiguous	YGSDYNTGGGYGSTEGNRYGSDYNTTGGEGNR	[R].YGSDYNTGGGYGSTEGNRYGSDYNTTGGEGNR.[Y]					0.00021225	0	1.174	1	1	2	731313574	731313574	731313574 [35-66]	1	3326.35	32
FALSE	High	Unambiguous	TDEAILNHNPDLGR	[R].TDEAILNHNPDLGR.[G]					0.144787	0.00292848	0.113	1	1	1	731357976	731357976	731357976 [110-123]	0	1564.77	14
FALSE	High	Unambiguous	DHNPTVWYADNGER	[K].DHNPTVWYADNGER.[L]					0.0283745	0	0.378	1	3	1	731334129	A0A1S3B7E1; 731334129; A0A0A0LG05	731334129 [31-44]	0	1673.73	14
FALSE	High	Unambiguous	NDGPSGSITDTLRESSR	[R].NDGPSGSITDTLRESSR.[T]					0.0415458	0	0.316	1	1	1	1108951321	1108951321	1108951321 [101-117]	1	1791.85	17
FALSE	High	Unambiguous	FASINVENTEENRR	[R].FASINVENTEENRR.[A]					0.0792459	0.000962316	0.211	1	1	1	A0A0D9WIC8	A0A0D9WIC8	A0A0D9WIC8 [40-53]	1	1678.81	14
FALSE	High	Unambiguous	WIADSRDEYTEER	[R].WIADSRDEYTEER.[L]					0.149309	0.00333266	0.108	1	2	1	A0A0K9QMP7	731355245; A0A0K9QMP7	A0A0K9QMP7 [220-232]	1	1669.75	13
FALSE	High	Unambiguous	VGASLQGPPDSSNLDHVR	[R].VGASLQGPPDSSNLDHVR.[D]					0.0020786	0	0.803	1	1	2	731350729	731350729	731350729 [484-501]	0	1848.92	18
FALSE	High	Unambiguous	QEAQQDLQSRPSPAALGASAVR	[R].QEAQQDLQSRPSPAALGASAVR.[G]					0.00462377	0	0.673	1	36	2	A0A2G5D045	A0A1U8KNZ1; L0AUW5; A0A1U8B2Z7; A0A0L9TU15; A0A2N9EQZ7; 731350922; A0A059CEY5; A0A068UA17; A0A2R6RB81; A0A2P6Q2B8; A0A059CGI1; M5X9V9; A0A200RBC6; A0A2P5C6P7; A0A067JL16; A0A2G5D045; A0A2H5N6Q6; A0A061F4S2; A0A2R6PXB2; A0A2P5EPP7; A0A1U8KY53; A0A1U8KJS8; A0A067GSG8; A0A0K9Q9T9; B9HZH5; A0A1Q3B014; V4UL35; A0A1L6K494; V7C9P2; A0A1S3URM3; A0A1R3HEU2; A0A0D2Q3N8; A0A2P5RVJ6; A0A2R6Q9V0; B9RXE4; A0A2…	A0A2G5D045 [193-214]	0	2280.17	22
FALSE	High	Unambiguous	MIGTPEPDNVSAVHNATNATR	[K].MIGTPEPDNVSAVHNATNATR.[D]					0.00156642	0	0.849	1	2	1	731327828	1108910198; 731327828	731327828 [493-513]	0	2195.05	21
FALSE	High	Unambiguous	VDPSYQFENDRLR	[K].VDPSYQFENDRLR.[K]					0.19213	0.00652397	0.067	1	1	1	731317957	731317957	731317957 [82-94]	1	1638.79	13
FALSE	High	Unambiguous	TVEQTFDSTISAAHSR	[K].TVEQTFDSTISAAHSR.[F]					0.0099739	0	0.548	1	1	2	731361026	731361026	731361026 [53-68]	0	1749.84	16
FALSE	High	Unambiguous	TVEAPISSQAPASESDRWGR	[K].TVEAPISSQAPASESDRWGR.[R]					0.00197881	0	0.811	1	1	1	731326606	731326606	731326606 [910-929]	1	2144.04	20
FALSE	High	Unambiguous	DSTNNDEIYPNENGGSMGYREDR	[R].DSTNNDEIYPNENGGSMGYREDR.[D]					0.0290811	0	0.374	1	1	1	731332271	731332271	731332271 [90-112]	1	2633.08	23
FALSE	High	Unambiguous	IISDDPIDVERR	[K].IISDDPIDVERR.[Q]					0.111828	0.00224036	0.155	1	2	1	1108817092	1108817092; A0A0J8BB33	1108817092 [85-96]	1	1427.75	12
FALSE	High	Unambiguous	LQATLDTIQSTEQAREETR	[R].LQATLDTIQSTEQAREETR.[A]					0.00243903	0	0.777	1	1	1	731370585	731370585	731370585 [818-836]	1	2190.1	19
FALSE	High	Unambiguous	KRPSNSEFIDVNEHR	[R].KRPSNSEFIDVNEHR.[Q]					0.167816	0.00563879	0.089	1	1	1	B9R9I7	B9R9I7	B9R9I7 [185-199]	1	1827.91	15
FALSE	High	Unambiguous	TVQADDEQGRLLEER	[K].TVQADDEQGRLLEER.[D]					0.168851	0.00563879	0.088	1	2	1	A0A0K9RTW4	731353339; A0A0K9RTW4	A0A0K9RTW4 [323-337]	1	1758.86	15
FALSE	High	Unambiguous	TDNQLSAASEQQVGHPQQSSR	[R].TDNQLSAASEQQVGHPQQSSR.[A]					0.000395015	0	1.073	1	1	1	1108957645	1108957645	1108957645 [674-694]	0	2268.06	21
FALSE	High	Unambiguous	VNDRTDEYGGSIENR	[KR].VNDRTDEYGGSIENR.[C]					0.00887395	0	0.567	1	25	2	A0A2K3MVZ0	A0A2K3MVZ0; A0A151SD44; C6TIW2; A0A1S2YX76; G7K3S4; A0A1S2YX83; Q76FS1; I3SBD7; 731313931; I1JAQ7; G7K3R4; A0A022R305; A0A251TJ81; A0A022R467; Q76FS0; A0A068VLZ0; G7K3S2; B7FIY4; Q76FR7; G7K3R3; Q9AVK9; Q76FR8; V7CFQ8; A0A2K3L822; I3T1Y1	A0A2K3MVZ0 [200-214]	1	1724.78	15
FALSE	High	Unambiguous	SQGTTVMLADSHGDSSR	[R].SQGTTVMLADSHGDSSR.[D]					0.00317737	0	0.734	1	1	1	731358319	731358319	731358319 [84-100]	0	1748.79	17
FALSE	High	Unambiguous	AFIDASRPGGSR	[R].AFIDASRPGGSR.[T]					0.146579	0.00292848	0.111	1	3	1	731350942	A0A175YJI6; A0A0K9QEV6; 731350942	731350942 [260-271]	0	1233.63	12
FALSE	High	Unambiguous	EDATVTIVHSR	[KR].EDATVTIVHSR.[T]					0.153027	0.00373344	0.104	1	26	1	A0A022QWX8	A0A2G9GJ98; A0A2P5S8G4; A0A2G2VVL2; A0A0K9QPJ4; A0A0D2VQL8; A0A068U4M3; A0A2P5VZ77; A0A0K9QMZ3; 731311947; W9RX84; Q8W528; A0A1J6IVN4; A0A0K9R8C6; A0A1U8IFP4; A0A022QWX8; A0A1U8EB53; A0A0D2UWZ4; A0A0D2TC99; A0A068UM70; A0A1U8KI02; A0A1U8KCW0; A0A2G3BHC2; A0A1U8KHA1; A0A0K9R6A2; A0A1J7HVY9; 1108872342	A0A022QWX8 [259-269]	0	1227.63	11
FALSE	High	Unambiguous	MGAEDPYAAYGGDRR	[R].MGAEDPYAAYGGDRR.[S]					0.129614	0.00257247	0.131	1	1	1	1108819365	1108819365	1108819365 [87-101]	1	1628.71	15
FALSE	High	Unambiguous	VASMSEDLSVERDR	[K].VASMSEDLSVERDR.[V]					0.0461246	0	0.299	1	2	1	731351660	731351662; 731351660	731351660 [157-170]	1	1593.75	14
FALSE	High	Unambiguous	EDGSNMMSGQEATQPSHVR	[R].EDGSNMMSGQEATQPSHVR.[A]					0.00494739	0	0.662	1	1	1	731370585	731370585	731370585 [2041-2059]	0	2060.88	19
FALSE	High	Unambiguous	ASFDHSAPIPNR	[R].ASFDHSAPIPNR.[-]					0.0292605	0	0.373	1	1	2	731326031	731326031	731326031 [199-210]	0	1311.64	12
FALSE	High	Unambiguous	VGYATSRAPDDLDTR	[K].VGYATSRAPDDLDTR.[L]					0.0292605	0	0.373	1	2	2	731360225	A0A1Z4EAX4; 731360225	731360225 [433-447]	1	1636.79	15
FALSE	High	Unambiguous	FSDAPPLDDHR	[R].FSDAPPLDDHR.[S]					0.162734	0.00409645	0.094	1	1	1	731322202	731322202	731322202 [39-49]	0	1269.59	11
FALSE	High	Unambiguous	IEEEELETNPQPSTRPR	[K].IEEEELETNPQPSTRPR.[T]					0.00352755	0	0.717	1	1	1	731315190	731315190	731315190 [255-271]	0	2024.99	17
FALSE	High	Unambiguous	DREEEMQVLNR	[R].DREEEMQVLNR.[T]					0.0221865	0	0.418	1	1	1	731343882	731343882	731343882 [163-173]	1	1418.67	11
FALSE	High	Rejected	AGEDAESLGLTGHER	[K].AGEDAESLGLTGHER.[Y]					0.0544564	0.00054243	0.272	0	1	1		R0F3N9		0	1541.72	15
FALSE	High	Unambiguous	STNNDQVEEHNAAAQTAELSR	[R].STNNDQVEEHNAAAQTAELSR.[T]					0.0020406	0	0.806	1	1	1	731335609	731335609	731335609 [694-714]	0	2285.04	21
FALSE	High	Unambiguous	FGYDYSGGYDREVGGR	[R].FGYDYSGGYDREVGGR.[Q]					0.0623462	0.00054243	0.25	1	1	1	731348501	731348501	731348501 [152-167]	1	1797.78	16
FALSE	High	Unambiguous	MASSMTDSPQVSHPVVGPEVR	[K].MASSMTDSPQVSHPVVGPEVR.[T]					0.00262584	0	0.765	1	1	1	731327024	731327024	731327024 [71-91]	0	2211.05	21
FALSE	High	Unambiguous	TLYHTDDVPQDMVGR	[K].TLYHTDDVPQDMVGR.[R]					0.034546	0	0.346	1	1	1	731324331	731324331	731324331 [60-74]	0	1746.81	15
FALSE	High	Unambiguous	LGTNQSADFFRGDNPEGLEAR	[K].LGTNQSADFFRGDNPEGLEAR.[N]					0.00698152	0	0.606	1	3	2	A0A068ULY3	A0A068ULY3; 731355938; M0T2D7	A0A068ULY3 [396-416]	1	2294.08	21
FALSE	High	Unambiguous	YSGPTIHFVDEEYDTGR	[R].YSGPTIHFVDEEYDTGR.[I]					0.0837559	0.000962316	0.202	1	8	1	731334684	A0A0D3CF47; M4E317; 731334684; A0A087HS12; R0GS06; A0A078IQG2; V4KUI7; A0A178WAT3	731334684 [217-233]	0	1985.89	17
FALSE	High	Unambiguous	DRGPYPIEQIIR	[R].DRGPYPIEQIIR.[D]					0.14214	0.00292848	0.116	1	1	1	731364072	731364072	731364072 [114-125]	1	1456.79	12
FALSE	High	Unambiguous	IGELETEIESLRR	[K].IGELETEIESLRR.[E]					0.0337065	0	0.35	1	1	1	731365676	731365676	731365676 [53-65]	1	1544.83	13
FALSE	High	Unambiguous	FTSDIWHPNVYTDGR	[R].FTSDIWHPNVYTDGR.[V]					0.0230205	0	0.412	1	4	2	731349052	731349052; A0A1J3K3X3; A0A1J3EMD6; A0A1J3C8Z0	731349052 [75-89]	0	1807.84	15
FALSE	High	Unambiguous	VLQPTIATQSGRPSEANSLYELDR	[K].VLQPTIATQSGRPSEANSLYELDR.[A]					0.000951832	0	0.93	1	1	1	1108937926	1108937926	1108937926 [192-215]	0	2645.35	24
FALSE	High	Unambiguous	SLGLNYNMEGLTGNTLDSHR	[K].SLGLNYNMEGLTGNTLDSHR.[L]					0.00155681	0	0.85	1	1	2	731316086	731316086	731316086 [91-110]	0	2192.04	20
FALSE	High	Unambiguous	VVAVSAFQSDTPRPVMISR	[R].VVAVSAFQSDTPRPVMISR.[T]					0.0299893	0	0.369	1	1	1	731357927	731357927	731357927 [62-80]	0	2060.1	19
FALSE	High	Unambiguous	YVVNTTLGPALGRPLDSQAAAR	[R].YVVNTTLGPALGRPLDSQAAAR.[A]					0.0924168	0.00187066	0.186	1	1	1	731331084	731331084	731331084 [114-135]	0	2270.23	22
FALSE	High	Unambiguous	YTNPNSSNEVHYPNSGISSAPGAGGSFYGSTPEAPGMR	[R].YTNPNSSNEVHYPNSGISSAPGAGGSFYGSTPEAPGMR.[M]					0.000489888	0	1.038	1	1	1	731315828	731315828	731315828 [536-573]	0	3857.71	38
FALSE	High	Unambiguous	SAENSWVPDPVTGYYRPANR	[R].SAENSWVPDPVTGYYRPANR.[A]					0.00248444	0	0.774	1	1	1	731346245	731346245	731346245 [53-72]	0	2279.08	20
FALSE	High	Unambiguous	EFVSSDALENEREILR	[K].EFVSSDALENEREILR.[S]					0.00693871	0	0.607	1	1	1	731311599	731311599	731311599 [281-296]	1	1906.95	16
FALSE	High	Unambiguous	VFSAWSLSPR	[K].VFSAWSLSPR.[R]					0.0663009	0.000962316	0.24	1	2	1	731315644	731315646; 731315644	731315644 [8-17]	0	1149.61	10
FALSE	High	Unambiguous	TEMTTAERELDQNTNFDWNR	[K].TEMTTAERELDQNTNFDWNR.[IL]					0.00275826	0	0.757	1	65	1	A0A0J8BEJ3	A0A0A0LGD1; A0A022R422; A0A0L9V343; A0A0J8BEJ3; A0A061F5Z8; A0A2K1YJC3; A0A1J3H4F2; A0A0J8BAI6; A0A1J3F4P4; A0A1S3C0A1; A0A151QXE0; A0A0D3CHZ1; A0A0J8BE90; A0A1R3KC10; A0A2K1YJC7; A0A2N9IA02; A0A0B2PDP0; A0A2H5PJJ6; A9U459; A0A178VC00; M5X2S7; A0A2R6PRH3; A0A067G3X1; A0A0S3S9M3; M4CC67; Q8L6Y1; A0A1S3TKN6; A0A059BN02; A0A2R6PTB0; A0A2I4H6W1; R0I3N0; A0A2G9GLZ2; A0A1Q3C2T7; A0A2K1IYT1; A0A1S3BYL9;…	A0A0J8BEJ3 [276-295]	1	2471.09	20
FALSE	High	Unambiguous	DPYGFRPLVMGR	[R].DPYGFRPLVMGR.[RK]					0.171996	0.00596827	0.085	1	70	1	731318358	A0A2G3BW41; A0A2G2Z8U5; A0A2G2WJ40; M0ZMW1; A0A118K2B9; D7L7L4; A0A2G2WI98; Q9SI61; 731318358; A0A2P5YK47; A0A0C9S8D6; A0A200QJX6; A0A067JUP5; A0A2H5QGA7; A0A2G3C5B6; A0A1Y1INH9; W9RA62; A0A2G3BZE4; A0A0D2RL95; A0A1U8DZM0; A0A0D6QUQ5; A0A2P5YPI0; F6I180; A0A2G2XRB5; A0A2G2XNW1; A0A2I4E7D6; A0A0C9S696; A0A2K3NYV3; A0A1U8LMA9; A0A200PXH4; A0A176VE71; A0A1U8LM78; A0A2G2V333; A0A2R6XS49; D8R4A6; A0A1…	731318358 [249-260]	0	1407.72	12
FALSE	High	Unambiguous	LIGAPPGYVGHEEGGQLTEAVR	[R].LIGAPPGYVGHEEGGQLTEAVR.[R]					0.000132185	0	1.251	1	87	1	731366669	A0A1S4D6P6; A0A218XZ87; W1P4G4; A0A2R6PCN2; A0A1J3J210; A0A1S2YRA1; R0I6C7; A0A2G5DWL5; A0A0A0LQL1; S8D2V7; V7C1Z8; A0A0V0IVK6; A0A2K1XIJ9; A0A2G3A1Z9; A0A151SPH8; A0A251TYV4; A0A1Q3CYH1; B9RLP7; A0A0L9UBC4; A0A2P6P331; A0A0D3CWP6; M1CAJ2; A0A2H3ZAP4; 731366669; A0A200QH21; A0A2P5S6Z5; A0A0D2MLY0; A0A1U8B5M0; V4TVM6; A0A1U7XPT0; A0A072UQA8; A0A2J6M068; Q6PWH9; A0A061FWY3; 731366671; A0A150FYP7; A…	731366669 [647-668]	0	2250.15	22
FALSE	High	Unambiguous	LETAPADFRFPTTNQTR	[K].LETAPADFRFPTTNQTR.[H]					0.12803	0.00257247	0.133	1	125	2	J3MN27	A0A0B2RLP6; A0A2C9WE10; M1D1D2; A0A1J6KGB1; A0A0D3FJC2; I1GSA4; V7B6M8; A0A2N9J1S9; M1BI72; J3MN27; A0A067GQR8; A0A022R8B0; A0A0S3RMW1; A0A199W8B0; B4FNN1; A0A2P5R0S1; A0A2P4LTI2; A0A1U8B9F5; I1MAW4; A0A2I0A5G5; A0A078IBE5; A0A0L9UZP8; M0TRB6; A3BMA7; A0A1S4A9F8; B4FCQ4; A0A2I0HTH1; A0A1U7YM83; A0A2C9U0S0; K4DG42; B6UFG8; A0A0D9X1L7; A0A1D1YTZ3; A0A2G2VH05; I1PBX4; A0A2H3YWA8; B9RJN9; A0A200RDV6;…	J3MN27 [88-104]	1	1964.98	17
FALSE	High	Unambiguous	NYGNEAAGDGGVGGSGRPPGSGLGSGNFSLAR	[K].NYGNEAAGDGGVGGSGRPPGSGLGSGNFSLAR.[Q]					4.56151e-05	0	1.424	1	1	1	B5QTD2	B5QTD2	B5QTD2 [12-43]	0	2935.37	32
FALSE	High	Unambiguous	VDRLDESELLR	[K].VDRLDESELLR.[T]					0.116032	0.00257247	0.149	1	13	1	M1AER9	K4CL87; A0A0K9RXX0; A0A2G2W596; M1AER9; A0A251STM1; A0A1S3YJM7; A0A1U7VPI9; 731317833; A0A2G2YWH3; A0A1U8DRH7; A0A1S3XSW4; A0A1S3YIS7; A0A1J6I490	M1AER9 [112-122]	1	1344.71	11
FALSE	High	Unambiguous	YGVVDEHFEVTR	[K].YGVVDEHFEVTR.[F]					0.0134816	0	0.499	1	3	2	733214039	731358830; L7ZC15; 733214039	733214039 [115-126]	0	1450.7	12
FALSE	High	Unambiguous	AYQTASTTAESDLPPTHPIR	[K].AYQTASTTAESDLPPTHPIR.[L]					0.151157	0.00333266	0.106	1	2	1	A0A2C9UEK9	A0A2C9UEK4; A0A2C9UEK9	A0A2C9UEK9 [155-174]	0	2156.06	20
FALSE	High	Unambiguous	AAQDIANDLPPTHPIR	[K].AAQDIANDLPPTHPIR.[L]					0.0219153	0	0.42	1	1	3	731339703	731339703	731339703 [160-175]	0	1728.9	16
FALSE	High	Unambiguous	SLEEDVAQHTTGDFR	[KR].SLEEDVAQHTTGDFR.[K]					0.133662	0.00292848	0.126	1	6	2	731338882	A0A2P2NJ99; 731338882; A0A0C5A1R1; W1NKC0; A0A2C9U177; A0A0K9RLZ2	731338882 [132-146]	0	1704.78	15
FALSE	High	Unambiguous	EMSGSNIFAEGDRVEPR	[R].EMSGSNIFAEGDRVEPR.[D]					0.0149675	0	0.482	1	1	1	731338884	731338884	731338884 [261-277]	1	1893.88	17
FALSE	High	Unambiguous	LDDVNGRDWIVSR	[K].LDDVNGRDWIVSR.[V]					0.156839	0.00409645	0.1	1	2	2	731354498	731354498; Q1H8M9	731354498 [247-259]	1	1544.78	13
FALSE	High	Unambiguous	ADTLDPALLRPGR	[R].ADTLDPALLRPGR.[L]					0.0822248	0.000962316	0.205	1	235	2	A0A2J7ZYJ8	A0A1D6Q2Q4; A0A199V6V8; A0A0B2QTD8; A0A067DBV2; B1PBX8; A0A1J3DFS8; A0A0D6R5Y5; A0A1U7Z1S1; V4KX54; A0A1D1YDK7; A0A0D2S5X1; I1IQ49; D5A8Q6; A9PGI7; A0A2H5Q350; A0A1J6J0J9; A0A067DCZ2; A0A2P2LKA1; A9PJR7; A0A1S4BKX0; A9SHI2; A0A1R3GR86; A0A059DAS9; A0A087GBV7; M1BUA0; A0A1S3ZWP0; A0A1S3C3H0; M0TJN2; A0A068U697; I0YMK2; D8TL23; A0A2K3M8J7; A0A1U7ZEA3; A0A178UAH2; A0A2P6S9Y9; A0A1Y1IFI2; K8EJG2; A0A…	A0A2J7ZYJ8 [1996-2008]	0	1394.78	13
FALSE	High	Unambiguous	VATPDQAQEVHFELR	[K].VATPDQAQEVHFELR.[K]					0.036964	0	0.335	1	1	1	731348961	731348961	731348961 [176-190]	0	1739.87	15
FALSE	High	Unambiguous	IDMSEYMEQHSVAR	[R].IDMSEYMEQHSVAR.[L]					0.00648483	0	0.618	1	118	2	731366669	A0A2G9GIF2; K3Z3N1; A0A1S4D6P6; A0A218XZ87; U3N2T5; A0A061S551; W1P4G4; Q334I0; K4CAB3; A0A1D5RWU1; Q334I1; A0A2R6PCN2; A0A2G5DWL5; A0A0U3J3S9; S8D2V7; G1EIL5; A0A2G9IA76; A0A0U3U5J3; Q9XEI1; A0A0V0IVK6; A0A0U3TEZ4; A0A0A9D202; A0A2G3A1Z9; A0A251TYV4; A0A2P6P331; M1CAJ2; A0A1S3XS86; A0A0U3IYU8; A0A2H3ZAP4; H6UG39; F2E1V5; 731366669; K3Z3M6; J3M8Y7; A0A200QH21; A0A193KUX8; A0A2P5S6Z5; A0A0D2MLY0; …	731366669 [633-646]	0	1695.75	14
FALSE	High	Unambiguous	LRSGGPDDMGGFSGEEEAMEER	[K].LRSGGPDDMGGFSGEEEAMEER.[E]					0.00199102	0	0.81	1	1	1	731330539	731330539	731330539 [192-213]	1	2355.98	22
FALSE	High	Unambiguous	TALTYIDGNGNWHR	[R].TALTYIDGNGNWHR.[AVC]					0.12803	0.00257247	0.133	1	11	3	A0A2K3P5K5	G7JUD3; A0A022QDP7; A0A2K3P5K5; G7JUD2; 731354199; R0F0R3; D7M098; R0GUU0; A0A087GBN1; A0A059CWC4; A0A1S2YPD3	A0A2K3P5K5 [419-432]	0	1617.78	14
FALSE	High	Unambiguous	VQQDTGAVLIHPFNDSR	[K].VQQDTGAVLIHPFNDSR.[I]					0.0654904	0.000962316	0.242	1	1	1	731331092	731331092	731331092 [146-162]	0	1896.96	17
FALSE	High	Unambiguous	INVNGGAMALGHPLGATGAR	[KR].INVNGGAMALGHPLGATGAR.[C]					0.0447279	0	0.304	2	70	2	731368458; Q42918	A0A1R3J0F3; A0A0M4BM04; A0A1Z1G6V5; I3T435; A0A022QYH8; A0A2K2CZN3; A0A2K2BSP2; A0A251VJB1; A0A0V0ID11; A0A1R3G4P1; A0A0F6MU03; A0A103XHZ1; A0A2G2W245; Q6W6X6; A0A1J3DUB8; A0A2I0HXQ7; A5BXL8; V4M6J2; A0A2C9W7S4; A0A2R6PX71; B9GMG4; A0A072VIH3; A0A078G370; V7BHN0; M4E2C7; A0A0B0N1S6; A0A0A0LNB2; A0A1U8IKY8; M1CWA6; Q43742; 731368458; I1I4F5; B9RWL7; A0A2K3P5R8; D7LFQ1; A0A2I4DRB3; A0A1S4BFQ9; A0A1…	731368458 [382-401]; Q42918 [382-401]	0	1876.98	20
FALSE	High	Unambiguous	VLTPEVVNTQTGAYLHR	[K].VLTPEVVNTQTGAYLHR.[F]					0.0116316	0	0.523	1	3	1	A0A059BST5	731359368; A0A059BST5; A0A059BTR8	A0A059BST5 [202-218]	0	1898.01	17
FALSE	High	Selected	GGGGGGYGGR	[R].GGGGGGYGGR.[GRQ]					0.090171	0.000962316	0.19	1	17	1	A0A061DZ10	A0A2G9I733; A0A151TGB8; A0A2K3P4T0; A0A2K3CUN5; A0A0B0MVD1; A0A061DZ10; A0A0E0JEG3; A8ISE0; A0A0Q3IR60; A0A1S3CE16; F2D9E7; A0A1S2Y9J2; Q8RW11; A0A1S2Y6Q8; D2D310; A0A1U8NV97; A0A1D6RRV7	A0A061DZ10 [105-114]	0	794.354	10
FALSE	High	Unambiguous	GGGGGGYGGGGGGR	[R].GGGGGGYGGGGGGR.[RY]					0.0537907	0	0.274	1	2	2	A0A1E5VY28	A0A1E5VY28; A0A0R0HA70	A0A1E5VY28 [88-101]	0	1022.44	14
FALSE	High	Unambiguous	VILDRETGR	[RK].VILDRETGR.[S]					0.109784	0.00224036	0.158	1	36	2	731358686	A0A1J3J049; A0A2R6PU50; A0A1D1Z073; A0A2H3XZY3; A0A2I0ADQ1; A0A1J3I6A5; A0A218VWD0; A0A078G9J0; A0A067KHN1; A0A2G9GFM7; K7KHJ7; M4F4E4; A0A0D3DDH8; A0A1J3F184; A0A022RYZ8; B9RLN6; A0A2I0W8V8; A0A022RVV8; A0A0D3E1P2; A0A0V0HTR9; D7MUG8; A0A2R6PRT5; M4D926; A0A178UBT5; A0A2I0A2G9; A0A2C9VR70; K4BC34; R0EXZ8; A0A1J3CX73; Q941H8; A0A1Q3B8Q8; A0A2G9HAK1; 731358686; M0ZM56; A0A2I0VNU1; A0A078FQR8	731358686 [39-47]	1	1058.6	9
FALSE	High	Unambiguous	QGLDLVDLVALSGAHTIGNAR	[R].QGLDLVDLVALSGAHTIGNAR.[C]					0.0156259	0	0.475	2	2	2	731337443; 731337447	731337443; 731337447	731337443 [184-204]; 731337447 [183-203]	0	2120.15	21
FALSE	High	Unambiguous	FSQVPDEQNSMSTEHSSYSPAAQTAMNQR	[R].FSQVPDEQNSMSTEHSSYSPAAQTAMNQR.[R]					0.000867953	0	0.945	1	1	1	731341195	731341195	731341195 [439-467]	0	3228.4	29
FALSE	High	Unambiguous	TTTGGSLRESPEDESPMELQDTAAR	[R].TTTGGSLRESPEDESPMELQDTAAR.[L]					0.00170727	0	0.835	1	2	1	A0A0J8B5U3	A0A0J8B5U3; 731376535	A0A0J8B5U3 [26-50]	1	2678.22	25
FALSE	High	Unambiguous	MIMLDDNGEHAETIR	[K].MIMLDDNGEHAETIR.[I]					0.00465229	0	0.672	1	2	2	731323410	A0A0K9QZW2; 731323410	731323410 [162-176]	0	1744.8	15
FALSE	High	Unambiguous	FTDTGNFTLR	[K].FTDTGNFTLR.[C]					0.0455608	0	0.301	1	5	1	A0A176WNU7	A0A2K1ICL1; A0A176WNU7; 731329661; A9RFF7; A0A2R6WDH2	A0A176WNU7 [241-250]	0	1171.57	10
FALSE	High	Unambiguous	SMMGMFSGESQADPQNNADGRPASR	[R].SMMGMFSGESQADPQNNADGRPASR.[-]					0.0126775	0	0.509	1	1	1	731361533	731361533	731361533 [471-495]	0	2641.12	25
FALSE	High	Unambiguous	FPAVNTQGVSMAR	[R].FPAVNTQGVSMAR.[V]					0.0700742	0.000962316	0.231	2	4	1	731312085; 731312089	731312085; 731312091; 731312087; 731312089	731312085 [98-110]; 731312089 [98-110]	0	1377.69	13
FALSE	High	Unambiguous	MIAAIDAVR	[K].MIAAIDAVR.[TIVE]					0.122635	0.00257247	0.14	1	99	1	731318977	A0A0D2UXG6; A0A0D2TCZ6; A0A176WSY8; A0A0D2RSA3; M1C9E1; B9HUE4; V7BCX4; A0A2K1ZBF9; A0A2H5PB62; A0A251SEG6; A0A2K1YYG2; U3PHS9; M5XCG9; R0ISW2; A0A2I0JJA4; A0A2P5XC01; A0A059BGQ9; D8S047; A0A0V0IE13; D7TMA3; A0A067DU93; F4I032; A0A2K1YYF7; A0A061FUZ7; M4ETY6; A0A2K1YYF2; A0A2K1ZBG3; A9PGP7; A0A2K1ZBG0; A0A178W8K1; A0A0B0P3P4; A0A0K9R3V3; A0A2P5RCB6; A0A251TV65; A0A0D2VR55; A0A0D2TV43; A0A0A0KDM6;…	731318977 [247-255]	0	959.534	9
FALSE	High	Unambiguous	DRTLEEMSQEASDYR	[K].DRTLEEMSQEASDYR.[A]					0.132028	0.00257247	0.128	1	3	1	731354896	731354900; 731354898; 731354896	731354896 [193-207]	1	1829.8	15
FALSE	High	Unambiguous	EGGNSGGVTVVGSDAPNEYHLAPR	[K].EGGNSGGVTVVGSDAPNEYHLAPR.[N]					0.000945996	0	0.931	1	1	1	731331401	731331401	731331401 [5-28]	0	2383.13	24
FALSE	High	Unambiguous	TALTYIDGDGNWHR	[R].TALTYIDGDGNWHR.[VACS]					0.00559494	0	0.642	1	5	6	M5XKS4	C5Y9I0; M5XKS4; V4NA43; A0A2I4HMD8; A0A0A0LTH0	M5XKS4 [413-426]	0	1618.76	14
FALSE	High	Unambiguous	WFASMPASTQPNR	[R].WFASMPASTQPNR.[LF]					0.00814186	0	0.581	1	8	1	731360652	A0A0K9QM76; A0A2P5C6I6; 731360652; A0A2P5EPQ9; B8LR27; A0A2C9WFT3; M0TQH8; A0A2I0WBR6	731360652 [145-157]	0	1492.7	13
FALSE	High	Unambiguous	IFDTTLRDGEQSPGASMTPR	[R].IFDTTLRDGEQSPGASMTPR.[E]					0.00115886	0	0.898	1	1	1	731323486	731323486	731323486 [88-107]	1	2179.04	20
FALSE	High	Unambiguous	DMVVLSGGHTVGLAR	[K].DMVVLSGGHTVGLAR.[C]					0.0337065	0	0.35	1	1	1	731316476	731316476	731316476 [183-197]	0	1511.8	15
FALSE	High	Unambiguous	EQQDDEYFAALQADRER	[R].EQQDDEYFAALQADRER.[E]					0.00920752	0	0.561	1	1	1	731331209	731331209	731331209 [447-463]	1	2083.93	17
FALSE	High	Unambiguous	QEDGESRPLQASQPSQGDIGLGMNR	[R].QEDGESRPLQASQPSQGDIGLGMNR.[R]					0.000171145	0	1.209	1	1	1	1108951321	1108951321	1108951321 [432-456]	0	2670.25	25
FALSE	High	Unambiguous	VLNQQMDYYSNDPNADRLNR	[R].VLNQQMDYYSNDPNADRLNR.[L]					0.00915107	0	0.562	1	2	2	731353162	A0A151RR40; 731353162	731353162 [110-129]	1	2426.12	20
FALSE	High	Unambiguous	DIVALSGGHTIGR	[KR].DIVALSGGHTIGR.[ACG]					0.00519689	0	0.654	4	255	6	V4P2D5; A0A2R6P7L3; A0A2P5BXC0; B1A3K6	L0CTS4; D7L8B0; A0A1Q1G9C1; Q5JBR8; A0A2R6QQA1; A0A2G2W9I8; A0A1J3CQC3; A2ZQE5; K9K869; V4P2D5; Q9XGS8; A0A067FKW0; J9Z324; A0A1S3Z5I5; A0A0V0HEG4; A0A1J6I7J3; A0A1S3WYG6; R0GPK4; A0A087H8A3; J3MPG1; M0TIG6; A0A251MYR0; A0A0E0LQ61; C5J0H7; A0A2K1Z169; A0A2P2LNY6; H9CTH6; A0A067JYU6; K4CQB7; A0A2P5EV08; A0A2R6QT82; A0A1S3YCX4; A0A199UFP9; A0A1J7H8E5; A0A2I0K239; A0A067G3X2; B8B6B6; A0A2P5QBZ1; A0A…	V4P2D5 [150-162]; A0A2R6P7L3 [155-167]; A0A2P5BXC0 [152-164]; B1A3K6 [155-167]	0	1295.71	13
FALSE	High	Unambiguous	NGRDEGDAELDLGETSVPNQSR	[R].NGRDEGDAELDLGETSVPNQSR.[K]					0.00197881	0	0.811	1	1	2	731359936	731359936	731359936 [896-917]	1	2359.08	22
FALSE	High	Unambiguous	LDGGGVASGGFR	[K].LDGGGVASGGFR.[E]					0.184034	0.00627731	0.074	1	9	1	A0A0K9QXI8	A0A0D2QUU1; A0A0K9RRT8; 731317255; A0A1U8KNS4; A0A1U8K6Q1; A0A0D2RWB0; A0A0D2P9B2; A0A2P5YAP9; A0A0K9QXI8	A0A0K9QXI8 [208-219]	0	1092.54	12
FALSE	High	Unambiguous	YNDVSAADRSQESATASMTAAPR	[R].YNDVSAADRSQESATASMTAAPR.[R]					0.000867953	0	0.945	1	1	2	731335609	731335609	731335609 [630-652]	1	2399.09	23
FALSE	High	Unambiguous	NDQTHATAVEPVVVSSTGSR	[R].NDQTHATAVEPVVVSSTGSR.[S]					0.0164139	0	0.467	1	2	1	731348116	731348116; 731348118	731348116 [312-331]	0	2055.01	20
FALSE	High	Unambiguous	DTHLGGEDFDNR	[R].DTHLGGEDFDNR.[M]					0.0221865	0	0.418	1	2	1	A0A2P5Q841	A0A2P5Q841; A0A2P6PJ61	A0A2P5Q841 [106-117]	0	1375.59	12
FALSE	High	Unambiguous	ETATIVGDGSTQEAVVRR	[K].ETATIVGDGSTQEAVVRR.[I]					0.000427894	0	1.06	1	1	2	731359729	731359729	731359729 [391-408]	1	1888.97	18
FALSE	High	Unambiguous	EMMQNSDVLR	[R].EMMQNSDVLR.[Q]					0.114613	0.00257247	0.151	1	2	1	731357482	731357482; A0A0K9RF84	731357482 [423-432]	0	1222.56	10
FALSE	High	Rejected	FQGQATDIDLAR	[R].FQGQATDIDLAR.[K]					0.190952	0.00652397	0.068	0	9	1		A0A2I4EPX2; D7TGE8; A0A059C1V4; W9RPN0; A0A1U7ZY18; A0A2I4E5P6; F6I796; A0A059C106; A0A1U7ZDP6		0	1334.67	12
FALSE	High	Unambiguous	YGSDYNTTGGEGNRYGSDYNTATGGGYGSTEGNR	[R].YGSDYNTTGGEGNRYGSDYNTATGGGYGSTEGNR.[Y]					0.000687068	0	0.983	1	1	2	731313574	731313574	731313574 [53-86]	1	3498.43	34
FALSE	High	Unambiguous	GGGGAGGGGGGIDVDSSDPSPPPATAHVASR	[R].GGGGAGGGGGGIDVDSSDPSPPPATAHVASR.[N]					0.00138512	0	0.869	1	1	1	731312502	731312502	731312502 [188-218]	0	2660.23	31
FALSE	High	Unambiguous	GQGPPSGNSPPYFGPSR	[R].GQGPPSGNSPPYFGPSR.[K]					0.108442	0.00224036	0.16	1	1	1	731350872	731350872	731350872 [182-198]	0	1701.8	17
FALSE	High	Unambiguous	DMVALSGAHTLGQAR	[KR].DMVALSGAHTLGQAR.[CL]					0.0736081	0.000962316	0.223	1	80	4	731349380	C5Y359; A0A1J3D4X1; A0A218WCG3; W5BUC5; A0A199UUI8; A0A0H4CVY7; A0A2P2IPJ1; C0PGF4; M1B3Q2; K4C5I8; Q6T1D0; A0A067DSE4; A0A2J6L8I7; A0A199VVV5; A0A1D6QGH7; B4FBC8; C6JSB7; A0A2G2WU02; A0A067K111; A0A1D6LS36; A0A1S3Z4N1; 731349380; W5BDE0; A0A2G3CHC5; K3YCH7; M4CRC8; N1QSE4; A0A1S3ZGG3; A0A0A0KHH0; A0A1D6LS37; D8RVX4; A0A1J3HXW4; Q9LVL1; A0A178UDA9; A0A118K2S6; M8C0L2; A0A1S4A3W2; V4LFR3; Q84ZT6; …	731349380 [183-197]	0	1526.77	15
FALSE	High	Unambiguous	LNVTAIDTYDDHR	[KR].LNVTAIDTYDDHR.[M]					0.0604582	0.00054243	0.255	1	108	1	731361191	A0A172QP98; A0A0E0L7E6; G4U4J5; A0A2P5X9W2; G8FH01; Q8RUZ9; Q946V0; H6T5X2; A0A251V1I3; A0A2R6R9C4; A0A0P0KT88; A0A1E5W859; A0A287VJQ7; A0AR18; A0A0A1C3V2; Q6E6L3; M0U232; Q9AT37; Q8RV48; A0A287VK38; Q8RV47; A0A1R3K0M4; A0A0A1C3J0; O24566; A7Y7Y2; A0A0E0L7E8; Q8RV15; G8FH00; A0A142J9E5; A0A251S0N3; U5D9W1; A0A1S3AVE7; A0A200R9Y2; A0A061DTZ2; A0A2I6QQM5; A0A1D6NVZ6; A0A0B2QZU7; A0A0A1C4R9; A0A0A0L…	731361191 [465-477]	0	1532.73	13
FALSE	High	Rejected	APGGAPANVAVAISR	[K].APGGAPANVAVAISR.[L]					0.0169265	0	0.462	0	2	1		D8T075; D8RV45		0	1350.75	15
FALSE	High	Unambiguous	YTPNAGTLELR	[R].YTPNAGTLELR.[TQKSN]					0.0185623	0	0.447	1	88	4	A0A0J8E360	A0A076FWK3; A0A2K3L154; A0A1D6N631; A0A0J8E360; I3SD46; A0A1J7HYQ8; A0A1D6FPP1; A0A1U8B044; A0A2G9HKC5; I1HTT8; A0A0E0CAW8; A0A0P0VB29; A0A0Q3RCE5; A0A2G9IAH1; A0A0S3S105; E0CRG5; A0A2J6KRC7; A0A2H5QDD9; A0A067E7Y0; W1NGB5; A0A1E5W1L1; A0A022QUS0; A0A0L9UAV9; A0A072U3J0; M5WP84; Q7F2K1; A0A1U8P3N2; V4UPF7; I1LN02; A0A067DVJ1; A0A1D1YKH8; A0A0D3EWT8; A0A1B6Q798; A0A2I0B401; A0A0D2TKK9; V7D314; A0A…	A0A0J8E360 [131-141]	0	1234.64	11
FALSE	High	Unambiguous	LDPNNQELLDGVRR	[K].LDPNNQELLDGVRR.[C]					0.0608311	0.00054243	0.254	1	3	2	731330539	A0A1E5WBA4; 731330539; K3YR55	731330539 [488-501]	1	1638.86	14
FALSE	High	Unambiguous	IANTDTDLQLLNNAERDR	[R].IANTDTDLQLLNNAERDR.[L]					0.00668733	0	0.613	1	2	1	731317772	731317774; 731317772	731317772 [372-389]	1	2072.04	18
FALSE	High	Unambiguous	TLSPEFTSLVPPR	[K].TLSPEFTSLVPPR.[L]					0.0174551	0	0.457	1	1	3	731323024	731323024	731323024 [134-146]	0	1443.78	13
FALSE	High	Unambiguous	TTAFGDDVVIVAAHR	[R].TTAFGDDVVIVAAHR.[T]					0.00624989	0	0.624	1	1	2	731368458	731368458	731368458 [45-59]	0	1571.82	15
FALSE	High	Unambiguous	YMVIQGEPGSVIR	[K].YMVIQGEPGSVIR.[G]					0.0982789	0.00187066	0.176	1	13	1	731354014	M0SW80; A0A2H3Y6E0; H9XAV3; A0A1S3UX21; A0A2H3YGT0; 731354014; A0A0S3QX27; A0A1S3UX04; A0A2H3Y6D4; P49231; A0A0K9NTB4; S8CNS6; A0A0L9VS04	731354014 [72-84]	0	1448.76	13
FALSE	High	Unambiguous	NISRPSAPQFDDAPDYVNDIEEEMIR	[R].NISRPSAPQFDDAPDYVNDIEEEMIR.[A]					0.00344183	0	0.721	1	1	1	731331209	731331209	731331209 [189-214]	0	3021.39	26
FALSE	High	Unambiguous	NDNSHNTNFPDSPEPIYGTQFLPR	[R].NDNSHNTNFPDSPEPIYGTQFLPR.[K]					0.000520963	0	1.028	1	3	1	731325703	A0A2G5ED28; A0A2G5ED15; 731325703	731325703 [256-279]	0	2760.26	24
FALSE	High	Unambiguous	FINTDNQHLAVPEAVDFVDR	[K].FINTDNQHLAVPEAVDFVDR.[L]					0.0142489	0	0.49	1	2	1	1108933362	1108933362; 731337121	1108933362 [382-401]	0	2300.13	20
FALSE	High	Unambiguous	DAVTTISGPWWEVPTGRR	[R].DAVTTISGPWWEVPTGRR.[D]					0.0108707	0	0.534	1	1	1	731356248	731356248	731356248 [136-153]	1	2028.03	18
FALSE	High	Unambiguous	FRDLANSVPLATDEEPSTTDAVATFRGP	[K].FRDLANSVPLATDEEPSTTDAVATFRGP.[-]					7.1026e-05	0	1.352	1	4	3	731346220	Q42652; A6ZEA3; Q94G60; 731346220	731346220 [795-822]	2	2977.45	28
FALSE	High	Unambiguous	DIRVVINSPFPTGIEDYVHR	[K].DIRVVINSPFPTGIEDYVHR.[I]					0.0383534	0	0.329	1	1	2	A2WR82	A2WR82	A2WR82 [462-481]	1	2327.21	20
FALSE	High	Unambiguous	IGQISHSVVLGTLNVGDQGEGGVTDLSR	[R].IGQISHSVVLGTLNVGDQGEGGVTDLSR.[V]					8.80847e-05	0	1.317	1	3	2	1108865121	1108865121; A0A0J8B373; A0A0J8DX51	1108865121 [128-155]	0	2808.45	28
FALSE	High	Unambiguous	ASFANQSLDERDLVALSGAHTIGR	[K].ASFANQSLDERDLVALSGAHTIGR.[V]					0.121136	0.00257247	0.142	1	2	1	A0A2K1IBL0	A0A2K1IBL0; A9TSH6	A0A2K1IBL0 [176-199]	1	2528.29	24
FALSE	High	Unambiguous	NSDVIEMASYAPLFVNTNDRR	[K].NSDVIEMASYAPLFVNTNDRR.[W]					0.00189543	0	0.818	1	1	5	731324866	731324866	731324866 [487-507]	1	2412.16	21
FALSE	High	Unambiguous	STFDRQGLNTTDLVALSGAHTIGR	[K].STFDRQGLNTTDLVALSGAHTIGR.[S]					0.0110732	0	0.531	1	1	1	A0A0R4J5E9	A0A0R4J5E9	A0A0R4J5E9 [182-205]	1	2530.3	24
FALSE	High	Unambiguous	APVYGATLEELGLYKAQTKLPFNAFGTMAMAR	[K].APVYGATLEELGLYKAQTKLPFNAFGTMAMAR.[D]					0.116032	0.00257247	0.149	1	7	1	A0A2P5B999	A0A2I4EUQ0; A0A1S3VDM2; A0A151QQR2; A0A2P5B999; V7C142; A0A2P5AJD1; A0A059AQ13	A0A2P5B999 [345-376]	2	3459.78	32
FALSE	High	Unambiguous	VEFVDPREPVAVIPILR	[K].VEFVDPREPVAVIPILR.[A]					0.0450038	0	0.303	1	1	2	731361384	731361384	731361384 [123-139]	1	1949.12	17
FALSE	High	Unambiguous	GFEGDNMIER	[-].GFEGDNMIER.[S]					0.122635	0.00257247	0.14	1	1	1	H1ZY43	H1ZY43	H1ZY43 [1-10]	0	1167.51	10
FALSE	High	Unambiguous	VGSNVTLVSAVQLPGLNTLGISIAR	[K].VGSNVTLVSAVQLPGLNTLGISIAR.[I]					0.0547923	0.00054243	0.271	1	1	4	J3MR00	J3MR00	J3MR00 [80-104]	0	2479.42	25
FALSE	High	Unambiguous	FDPFGPPGVPGFEPDGIHGR	[R].FDPFGPPGVPGFEPDGIHGR.[F]					0.000369176	0	1.084	1	1	1	1108898286	1108898286	1108898286 [251-270]	0	2095	20
FALSE	High	Unambiguous	ELSELNGGDDVRPPLPVIR	[K].ELSELNGGDDVRPPLPVIR.[E]					0.161736	0.00409645	0.095	1	1	1	731337909	731337909	731337909 [86-104]	0	2076.11	19
FALSE	High	Rejected	DIFYRMGLSGKDIVALSGGHTLGR	[KR].DIFYRMGLSGKDIVALSGGHTLGR.[A]					0.0822248	0.000962316	0.205	0	8	1		A0A1U8KH60; A0A0D2NQD1; A0A1U8KMD8; A0A2P5S0X9; A0A1U8KHF9; A0A2P5Y3T3; F6I106; A0A0D2R9B9		2	2563.34	24
FALSE	High	Selected	AVFYRMGLSDKDIVALSGGHTLGR	[R].AVFYRMGLSDKDIVALSGGHTLGR.[A]					0.0490504	0	0.289	1	1	1	A0A2P5BXC0	A0A2P5BXC0	A0A2P5BXC0 [141-164]	2	2563.34	24
FALSE	High	Unambiguous	IIEAPSEFVDVEHPR	[K].IIEAPSEFVDVEHPR.[L]					0.00453924	0	0.676	1	1	2	731339915	731339915	731339915 [257-271]	0	1737.88	15
FALSE	High	Selected	IGEVHDGAATMDWMEQEQER	[K].IGEVHDGAATMDWMEQEQER.[G]					0.0374214	0	0.333	1	1	1	A0A270R698	A0A270R698	A0A270R698 [40-59]	0	2332	20
FALSE	High	Rejected	IGEVHEGGATMDWMEQEQER	[K].IGEVHEGGATMDWMEQEQER.[G]					0.0597191	0.00054243	0.257	0	2	1		A0A061R211; A0A061QY45		0	2332	20
FALSE	High	Unambiguous	EISSQLQNQRFVELDEALQR	[K].EISSQLQNQRFVELDEALQR.[A]					0.118921	0.00257247	0.145	1	1	1	A0A1D5X6T7	A0A1D5X6T7	A0A1D5X6T7 [58-77]	1	2403.23	20
FALSE	High	Unambiguous	NLDNPQSVDVYGEHAYPVTVAR	[R].NLDNPQSVDVYGEHAYPVTVAR.[Y]					0.00015227	0	1.228	1	1	2	731340962	731340962	731340962 [45-66]	0	2444.18	22
FALSE	High	Unambiguous	SFSDQGLSTTDMVALSGAHTIGQAR	[K].SFSDQGLSTTDMVALSGAHTIGQAR.[C]					0.000169053	0	1.211	1	2	5	731316489	731316489; O81266	731316489 [178-202]	0	2550.23	25
FALSE	High	Unambiguous	LYMEARPMEEGLAEAIDEGR	[R].LYMEARPMEEGLAEAIDEGR.[IV]					0.000662177	0	0.989	1	15	1	A0A251STB4	B9SD38; A0A1D1Z1H1; K4CL74; A0A2J6LVB1; A0A2G2W631; A0A0J8BGW2; A0A0E0KM97; A0A199V0A3; A0A2P2MJI9; O23755; A0A2P5FD05; M0SK19; A0A103Y4H2; K4CL75; A0A251STB4	A0A251STB4 [1001-1020]	0	2280.06	20
FALSE	High	Unambiguous	ALDALGPNPAAWTPPRTER	[R].ALDALGPNPAAWTPPRTER.[N]					0.000987611	0	0.924	1	2	4	1108782925	A0A0J8BEJ9; 1108782925	1108782925 [189-207]	1	2033.06	19
FALSE	High	Unambiguous	LREEVATLQNISSAGDAENLDGDESGER	[K].LREEVATLQNISSAGDAENLDGDESGER.[L]					5.63052e-06	0	1.76416	1	1	1	731336105	731336105	731336105 [246-273]	1	2975.38	28
FALSE	High	Unambiguous	DSTVIAGGPNWEVPVGRR	[R].DSTVIAGGPNWEVPVGRR.[D]					0.00920752	0	0.561	1	1	1	731337445	731337445	731337445 [136-153]	1	1909.99	18
FALSE	High	Unambiguous	NTTSVTDVDELNQRIETLER	[K].NTTSVTDVDELNQRIETLER.[E]					0.0108707	0	0.534	1	1	1	731365676	731365676	731365676 [25-44]	1	2333.16	20
FALSE	High	Unambiguous	QMGLSDQDIVVLSGGHTLGR	[K].QMGLSDQDIVVLSGGHTLGR.[C]					0.0365121	0	0.337	1	1	1	A0A2G2WJ41	A0A2G2WJ41	A0A2G2WJ41 [148-167]	0	2083.06	20
FALSE	High	Unambiguous	ITQNPDSFTDDMITHLR	[R].ITQNPDSFTDDMITHLR.[N]					0.00632724	0	0.622	1	1	1	731338783	731338783	731338783 [200-216]	0	2003.95	17
FALSE	High	Unambiguous	TLFSRMGLSDRDIVALSGGHTLGR	[R].TLFSRMGLSDRDIVALSGGHTLGR.[A]					0.0433734	0	0.309	1	2	1	V4P2D5	V4P2D5; D7MBQ9	V4P2D5 [139-162]	2	2559.35	24
FALSE	High	Unambiguous	AHTDMVTAIATPIDNSDMIVTASR	[R].AHTDMVTAIATPIDNSDMIVTASR.[D]					0.000417496	0	1.064	1	6	3	A0A0K9RIC1	A0A2H5Q9B7; A0A2P5AHD4; A0A067F699; A0A2P5DF52; 731334235; A0A0K9RIC1	A0A0K9RIC1 [13-36]	0	2530.23	24
FALSE	High	Unambiguous	FYPQFGSGSSDVVR	[R].FYPQFGSGSSDVVR.[R]					0.0125225	0	0.511	1	2	1	731352263	Q9XFW7; 731352263	731352263 [104-117]	0	1545.73	14
FALSE	High	Unambiguous	VFSQMAENER	[K].VFSQMAENER.[T]					0.0367373	0	0.336	1	1	3	731318984	731318984	731318984 [334-343]	0	1210.55	10
FALSE	High	Unambiguous	AIYKLLEELIQR	[K].AIYKLLEELIQR.[T]					0.149309	0.00333266	0.108	1	3	1	V4KZU2	A0A087GA19; M4E185; V4KZU2	V4KZU2 [429-440]	1	1488.88	12
FALSE	High	Unambiguous	QFSTPEDMLTGSSRPR	[R].QFSTPEDMLTGSSRPR.[T]					0.00134318	0	0.874	1	1	7	731350182	731350182	731350182 [15-30]	0	1808.86	16
FALSE	High	Unambiguous	SGSGEGGVSASTGLSTSLTSR	[R].SGSGEGGVSASTGLSTSLTSR.[L]					0.000654082	0	0.991	1	1	1	731350447	731350447	731350447 [269-289]	0	1897.91	21
FALSE	High	Unambiguous	VYDSFTISR	[KRL].VYDSFTISR.[DENGA]					0.0787601	0.000962316	0.212	2	113	4	731377532; 731333999	A0A1R3INE3; A0A251RV34; K4CPW9; F6GSV7; A0A067K7B9; A0A2G2Z1X7; A0A2P5DFT7; A0A2G3AD35; A0A059A5M9; A0A2P5VRG7; A0A0D2QJH5; A0A2N9IFA5; A0A2G5EXA5; A0A2H5PFE3; A0A0B0N1E6; A0A0B0M7C6; A0A2G3DAD3; M1AWF6; A0A1S4DNM3; A0A0A0LR86; A0A2K1YBI0; M1AWF5; A0A1S4DNL6; A0A2R6QGE0; A0A2I0I2A6; V9NC17; A0A2P4J507; A0A200PRH3; A0A0D2TYC2; K4CBX4; A0A0K9NPL3; A0A2G5EPR7; A0A072UZJ4; A0A1U7WLZ7; A0A1S4CAQ1; A0A…	731377532 [589-597]; 731333999 [613-621]	0	1087.54	9
FALSE	High	Unambiguous	IAANAFLAQR	[K].IAANAFLAQR.[IMV]					0.0309258	0	0.364	3	254	6	A0A0S3T1M9; 1108977069; A0A2I4EMJ7	A0A2P5D6M2; 731334816; A0A0E0D2B8; A0A0A9V598; A0A0K9S177; A0A2I0A2F6; C5WT74; A0A199V6A0; D3Y4F7; A0A2G2V9E2; Q75GS4; A0A151SZZ3; A0A1B6QHX7; A0A1S3Y1V9; A0A0E0GQD2; A0A1D5YI90; M0ZM42; M0SNU7; A0A0E0KF91; A0A0D3HU41; A0A0S3T1M9; 731347914; A0A0E0BS68; D7MJP7; A0A2P5VXE0; A0A1U8N5N6; A0A2G2Z2X2; A0A0V0ICK4; W5FDW8; A0A0E0RGU3; A0A0K9QFN6; A0A0E0KJ79; A0A0D2ZQD4; I3T6B5; A0A2R6WCS2; A0A0E0KG73; A…	A0A0S3T1M9 [217-226]; 1108977069 [217-226]; A0A2I4EMJ7 [217-226]	0	1074.61	10
FALSE	High	Unambiguous	SISISTSNWR	[R].SISISTSNWR.[CS]					0.0773202	0.000962316	0.215	1	102	2	A0A2J6LDY6	A0A2P2L364; A0A2C9UQB0; A0A0D3CZA9; A0A2P2L354; Q8L6J8; B9V283; 731326185; A0A151TQT1; A0A2G2X3T0; V7AWN8; A0A2I4F803; A0A165XM41; D7L800; A0A0K9QD87; B9V284; A0A067L423; A0A251NIQ0; A0A078I2R1; V4JSL1; I1KBG0; A0A2K2BY42; A0A103XTA0; A0A072V1L4; A0A1S3VZ78; A0A0V0I9G2; A0A2N9EKY8; I3SBA2; A0A2P2L350; A0A200PV31; A0A068UWK6; A0A1J3CRW5; A0A2K2B3H2; D6BV77; 731344984; C6TER7; M0ZHI1; A0A2P2L370; A…	A0A2J6LDY6 [133-142]	0	1150.59	10
FALSE	High	Unambiguous	MFVDYNEPQQER	[K].MFVDYNEPQQER.[VA]					0.00955363	0	0.555	1	39	4	731329677	A0A2P5SS84; A0A2P2MJ04; A0A067EUS4; A0A0D2TYS7; A0A2H5PWT1; A0A1U8JBK3; A0A067ETX2; A0A0D2UXD7; V4UEU0; A0A2C9UUG7; A0A0B0MRK8; A0A067EHV3; A0A067EHL2; A0A1U8BBF0; A0A067EUT1; A0A2P5PX19; A0A1U8M0P1; A0A0A0K6U7; D3GQL2; A0A1U8PCX6; A0A2P5QAZ7; A0A0D2QS08; A0A2R6QTG2; A0A1S3C1M6; A0A067EL88; A0A1U8N052; A0A2P2MJ87; A0A067JFR1; A0A061EGN8; A0A2P2MJ27; A0A2C9W6Z7; V4U9I2; A0A2P4IDC8; A0A2P2MJ16; B9S…	731329677 [463-474]	0	1555.68	12
FALSE	High	Unambiguous	IGVLTGNAGEIR	[R].IGVLTGNAGEIR.[K-R]					0.105158	0.00224036	0.165	1	9	1	A0A2P4KQJ7	A0A2P4KQJ7; A0A2P6Q2Z9; P85996; F6HIK4; M5WKI7; J7IER7; A0A2P6Q2X6; A0A2P4L008; 731337363	A0A2P4KQJ7 [772-783]	0	1199.67	12
FALSE	High	Unambiguous	SLGSILPR	[RK].SLGSILPR.[NKV]					0.176279	0.00596827	0.081	1	15	6	731313066	A0A1B6QNM0; A0A1D6K0L7; A0A1D6K0K9; A0A1D6K0P1; A0A1D6K0K5; A0A1D6K0P0; A0A1D6K0M0; A0A1D6K0N2; A0A1D6K0M9; A0A1D6K0P3; A0A1B6QNL7; 731313066; A0A0K9NYF3; K3ZR34; A0A1D6K0P5	731313066 [221-228]	0	842.509	8
FALSE	High	Unambiguous	LMAGTSEGGAAVFR	[K].LMAGTSEGGAAVFR.[L]					0.00613564	0	0.627	1	1	1	731323589	731323589	731323589 [266-279]	0	1366.68	14
FALSE	High	Unambiguous	TFADSVVVDR	[K].TFADSVVVDR.[K]					0.0696445	0.000962316	0.232	1	2	1	731329926	731329926; 1108914226	731329926 [582-591]	0	1108.56	10
FALSE	High	Unambiguous	SGQSPALQDAVDVER	[R].SGQSPALQDAVDVER.[G]					0.00636628	0	0.621	1	2	1	731334675	731334675; A0A0K9RQG3	731334675 [509-523]	0	1571.77	15
FALSE	High	Unambiguous	QGELEEIYAR	[K].QGELEEIYAR.[A]					0.0650888	0.000962316	0.243	1	2	1	A0A0K9QDB0	731329827; A0A0K9QDB0	A0A0K9QDB0 [324-333]	0	1207.6	10
FALSE	High	Unambiguous	FITVMEDQR	[R].FITVMEDQR.[QL]					0.122635	0.00257247	0.14	1	4	1	731314158	731314158; 1108875856; A0A0K9QLH6; 731314160	731314158 [201-209]	0	1138.56	9
FALSE	High	Unambiguous	FGWSANMER	[KR].FGWSANMER.[LI-]					0.188617	0.00652397	0.07	2	255	1	731360552; A0A250WVK3	A0A0D3HV11; H2KX39; A9SU16; A0A0K9RDS4; A0A0E0IL65; A0A2R6PB01; A0A087GGT3; A0A0D2PE67; A0A1S3ZAW0; A0A2G2Z336; A0A218XX77; A0A0S3RIP9; D0EWD6; Q9STX5; A0A0D3A5V9; A9TMP2; A0A0D3E7V5; A0A2P5RNX8; A0A2R6WNG7; A0A067F4L3; A0A151RR65; V4K5U1; A0A1D5ZZZ5; A0A0J8B8Z8; A0A1L6K4Q7; K8E9D6; A0A067G490; A0A0V0IUJ9; A0A1U8AUM4; A0A059DDX8; A0A2H5QIZ4; A0A1D5YSH5; A0A0K9PSM4; E1ZRI2; A0A0D2ND13; A0A2R6QCY6;…	731360552 [680-688]; A0A250WVK3 [679-687]	0	1097.48	9
FALSE	High	Unambiguous	TSGEYLVYNGVR	[R].TSGEYLVYNGVR.[T]					0.00503952	0	0.659	2	3	8	731310533; 731344436	731310533; 731344436; A0A2R6RXR4	731310533 [341-352]; 731344436 [341-352]	0	1357.67	12
FALSE	High	Unambiguous	IISGQGFASTIR	[R].IISGQGFASTIR.[A]					0.0134816	0	0.499	1	2	6	731352251	731352251; A0A0K9RKK2	731352251 [214-225]	0	1249.69	12
FALSE	High	Unambiguous	NILEISQASGAR	[R].NILEISQASGAR.[I]					0.019984	0	0.435	1	6	3	731374939	A0A0K9QJU0; 731374939; A0A0K9QHU2; 731374941; A0A0A0KWP6; A0A1S3BFZ8	731374939 [275-286]	0	1258.67	12
FALSE	High	Unambiguous	FSNVDLTYR	[K].FSNVDLTYR.[R]					0.111828	0.00224036	0.155	1	1	1	731324005	731324005	731324005 [384-392]	0	1114.55	9
FALSE	High	Unambiguous	QGAAVWGGASGFNR	[R].QGAAVWGGASGFNR.[I]					0.0058771	0	0.634	1	2	1	731328793	731366969; 731328793	731328793 [230-243]	0	1377.67	14
FALSE	High	Unambiguous	ASLASYVNVSR	[K].ASLASYVNVSR.[W]					0.0260336	0	0.392	1	2	4	733214909	A0A0J8B4D2; 733214909	733214909 [46-56]	0	1166.62	11
FALSE	High	Unambiguous	YVGTSDLQLER	[RKW].YVGTSDLQLER.[V]					0.0332945	0	0.352	1	68	1	J3LJ13	A0A0E0FK81; J9RMU3; Q43697; A0A2G5EW64; A2ZRW5; J3KYV5; A0A1D5W0J0; A0A1D5W0J1; 731324610; T1LKT2; A0A1D6FAY2; A0A249Y720; H9BFL1; J9R5N1; A0A0E0C0W9; K4D2Y1; A0A0E0JH70; A0A287E965; W5AET6; A0A2G9I5J2; A0A022PS56; A0A0D9WGI1; A0A1D5RW77; K3XHT4; K3Z679; J9RVN8; A9PHP0; A0A1L5JKB3; A0A287FZI3; Q9ZPN7; A0A1D5SHX1; I1HI54; J9RQW7; A0A287FZI0; A0A1S4C3U3; J9R5L3; A5ATG8; A0A1D5RZA3; J9RXZ6; N1R4U9; …	J3LJ13 [36-46]	0	1280.65	11
FALSE	High	Unambiguous	VSEQFTAMFR	[R].VSEQFTAMFR.[R]					0.0341237	0	0.348	5	256	1	731325985; A0A223HBR2; 731360530; J3LJ13; 731348756	A0A1U8HY47; A0A2G9HY56; M1BNF0; A0A0E0FK81; A0A251SNE7; B9I2F1; A0A1Y1I761; A0A1U8JUU9; A0A2H5NS51; N0DT81; Q40106; P28551; A0A2H5NCY8; A0A1D5X8S9; Q43697; A0A2H5NDH5; A0A178VS27; A0A1D5VCW1; P11482; B8ALG6; 731325985; A0A1U8JEV9; Q6VAF7; P29516; A0A0E0JW01; A0A2H5N0Y2; A0A251ST28; P18025; Q0ZUM9; A0A1D6C8W6; A0A067JZL4; Q65C76; A0A2G9FXJ1; A0A078FPV3; A3ANA0; E1CBS2; A0A2I4FGF9; A0A251N950; A0A1…	731325985 [381-390]; A0A223HBR2 [381-390]; 731360530 [386-395]; J3LJ13 [381-390]; 731348756 [381-390]	0	1215.58	10
FALSE	High	Unambiguous	ISAYQDGILR	[R].ISAYQDGILR.[V]					0.0418021	0	0.315	1	1	1	731327205	731327205	731327205 [108-117]	0	1135.61	10
FALSE	High	Unambiguous	QGNTAIVEYAYQR	[R].QGNTAIVEYAYQR.[T]					0.0464092	0	0.298	1	1	1	731358544	731358544	731358544 [686-698]	0	1512.74	13
FALSE	High	Unambiguous	TASEVNAAILTSQSR	[K].TASEVNAAILTSQSR.[E]					0.0033582	0	0.725	1	5	2	731350591	731350591; A0A2K1YFM8; U5FV49; A0A2K1YFK6; B9HYM5	731350591 [170-184]	0	1547.8	15
[truncated: 1,237 more rows]
[truncated: 20 more columns]
